# Supplementary material
Source: publisher figshare collection journal article supplement (https://acs.figshare.com/ndownloader/files/5691780)
Supplement: Supplementary file 1 [file 5691780]

 
# ic010695k.cif

data_Sn9W(CO)34-
 
_audit_creation_method            SHELXL
_chemical_name_systematic
;
  ?
;
_chemical_name_common             ?
_chemical_formula_moiety          ?
_chemical_formula_structural      ?
_chemical_formula_analytical      ?
_chemical_formula_sum             'C76 H152 K4 N10 O27 Sn9 W'
_chemical_formula_weight          3046.54
_chemical_melting_point           ?
_chemical_compound_source         ?
 
loop_
  _atom_type_symbol
  _atom_type_description
  _atom_type_scat_dispersion_real
  _atom_type_scat_dispersion_imag
  _atom_type_scat_source
  'C'  'C'   0.0033   0.0016
  'International Tables Vol C Tables 4.2.6.8 and 6.1.1.4'
  'H'  'H'   0.0000   0.0000
  'International Tables Vol C Tables 4.2.6.8 and 6.1.1.4'
  'N'  'N'   0.0061   0.0033
  'International Tables Vol C Tables 4.2.6.8 and 6.1.1.4'
  'O'  'O'   0.0106   0.0060
  'International Tables Vol C Tables 4.2.6.8 and 6.1.1.4'
  'K'  'K'   0.2009   0.2494
  'International Tables Vol C Tables 4.2.6.8 and 6.1.1.4'
  'Sn'  'Sn'  -0.6537   1.4246
  'International Tables Vol C Tables 4.2.6.8 and 6.1.1.4'
  'W'  'W'  -0.8490   6.8722
  'International Tables Vol C Tables 4.2.6.8 and 6.1.1.4'
 
_symmetry_cell_setting            ?
_symmetry_space_group_name_H-M    ?
 
loop_
  _symmetry_equiv_pos_as_xyz
  'x, y, z'
  '-x, -y, -z'
 
_cell_length_a                    17.018(3)
_cell_length_b                    27.057(5)
_cell_length_c                    28.298(6)
_cell_angle_alpha                 66.42(3)
_cell_angle_beta                  76.72(3)
_cell_angle_gamma                 87.27(3)
_cell_volume                      11608.1(40)
_cell_formula_units_Z             4
_cell_measurement_temperature     293(2)
_cell_measurement_reflns_used     ?
_cell_measurement_theta_min       ?
_cell_measurement_theta_max       ?
 
_exptl_crystal_description        ?
_exptl_crystal_colour             ?
_exptl_crystal_size_max           ?
_exptl_crystal_size_mid           ?
_exptl_crystal_size_min           ?
_exptl_crystal_density_meas       ?
_exptl_crystal_density_diffrn     1.743
_exptl_crystal_density_method     ?
_exptl_crystal_F_000              5976
_exptl_absorpt_coefficient_mu     3.095
_exptl_absorpt_correction_type    ?
_exptl_absorpt_correction_T_min   ?
_exptl_absorpt_correction_T_max   ?
 
_exptl_special_details
;
  ?
;
 
_diffrn_ambient_temperature       293(2)
_diffrn_radiation_wavelength      0.71073
_diffrn_radiation_type            MoK\a
_diffrn_radiation_source          'fine-focus sealed tube'
_diffrn_radiation_monochromator   graphite
_diffrn_measurement_device        ?
_diffrn_measurement_method        ?
_diffrn_standards_number          ?
_diffrn_standards_interval_count  ?
_diffrn_standards_interval_time   ?
_diffrn_standards_decay_%         ?
_diffrn_reflns_number             96256
_diffrn_reflns_av_R_equivalents   0.0604
_diffrn_reflns_av_sigmaI/netI     0.0564
_diffrn_reflns_limit_h_min        -19
_diffrn_reflns_limit_h_max        19
_diffrn_reflns_limit_k_min        -30
_diffrn_reflns_limit_k_max        30
_diffrn_reflns_limit_l_min        -32
_diffrn_reflns_limit_l_max        32
_diffrn_reflns_theta_min          2.53
_diffrn_reflns_theta_max          24.08
_reflns_number_total              33889
_reflns_number_observed           21318
_reflns_observed_criterion        >2sigma(I)
 
_computing_data_collection        ?
_computing_cell_refinement        ?
_computing_data_reduction         ?
_computing_structure_solution     'SHELXS-86 (Sheldrick, 1990)'
_computing_structure_refinement   'SHELXL-93 (Sheldrick, 1993)'
_computing_molecular_graphics     ?
_computing_publication_material   ?
 
_refine_special_details
;
  Refinement on F^2^ for ALL reflections except for 569 with very negative F^2^
  or flagged by the user for potential systematic errors.  Weighted R-factors
  wR and all goodnesses of fit S are based on F^2^, conventional R-factors R
  are based on F, with F set to zero for negative F^2^. The observed criterion
  of F^2^ > 2sigma(F^2^) is used only for calculating _R_factor_obs etc. and is
  not relevant to the choice of reflections for refinement.  R-factors based
  on F^2^ are statistically about twice as large as those based on F, and R-
  factors based on ALL data will be even larger.
;
 
_refine_ls_structure_factor_coef  Fsqd
_refine_ls_matrix_type            fullcycle
_refine_ls_weighting_scheme
  'calc w=1/[\s^2^(Fo^2^)+(0.1846P)^2^+0.0034P] where P=(Fo^2^+2Fc^2^)/3'
_atom_sites_solution_primary      direct
_atom_sites_solution_secondary    difmap
_atom_sites_solution_hydrogens    geom
_refine_ls_hydrogen_treatment     ?
_refine_ls_extinction_method      SHELXL
_refine_ls_extinction_coef        0.00000(5)
_refine_ls_extinction_expression
  'Fc^*^=kFc[1+0.001xFc^2^\l^3^/sin(2\q)]^-1/4^'
_refine_ls_number_reflns          33320
_refine_ls_number_parameters      1786
_refine_ls_number_restraints      0
_refine_ls_R_factor_all           0.1692
_refine_ls_R_factor_obs           0.1215
_refine_ls_wR_factor_all          0.4243
_refine_ls_wR_factor_obs          0.3794
_refine_ls_goodness_of_fit_all    1.653
_refine_ls_goodness_of_fit_obs    1.911
_refine_ls_restrained_S_all       1.687
_refine_ls_restrained_S_obs       1.911
_refine_ls_shift/esd_max          -3.130
_refine_ls_shift/esd_mean         0.127
 
loop_
  _atom_site_label
  _atom_site_type_symbol
  _atom_site_fract_x
  _atom_site_fract_y
  _atom_site_fract_z
  _atom_site_U_iso_or_equiv
  _atom_site_thermal_displace_type
  _atom_site_occupancy
  _atom_site_calc_flag
  _atom_site_refinement_flags
  _atom_site_disorder_group
Sn11 Sn 0.0203(2) 0.15840(8) -0.17293(8) 0.088 Uani 1 d . .
Sn12 Sn -0.1303(2) 0.21254(8) -0.15126(7) 0.082 Uani 1 d . .
Sn13 Sn -0.12510(13) 0.10769(7) -0.17804(7) 0.070 Uani 1 d . .
Sn14 Sn 0.01852(11) 0.16358(7) -0.27980(7) 0.064 Uani 1 d . .
Sn15 Sn 0.01281(12) 0.26825(7) -0.25175(7) 0.069 Uani 1 d . .
Sn16 Sn -0.15789(12) 0.29902(7) -0.25092(6) 0.061 Uani 1 d . .
Sn17 Sn -0.25114(11) 0.18793(7) -0.20136(6) 0.061 Uani 1 d . .
Sn18 Sn -0.15221(10) 0.15477(6) -0.28745(6) 0.049 Uani 1 d . .
Sn19 Sn -0.05526(9) 0.26456(6) -0.33802(6) 0.049 Uani 1 d . .
W110 W -0.23636(5) 0.26041(4) -0.31353(3) 0.042 Uani 1 d . .
C11 C -0.3488(13) 0.2454(9) -0.2936(9) 0.053 Uani 1 d . .
O11 O -0.4214(11) 0.2370(7) -0.2766(7) 0.069 Uani 1 d . .
C12 C -0.2345(11) 0.2556(8) -0.3779(8) 0.039 Uani 1 d . .
O12 O -0.2325(8) 0.2514(6) -0.4211(5) 0.045 Uani 1 d . .
C13 C -0.2605(11) 0.3359(8) -0.3472(8) 0.035 Uani 1 d . .
O13 O -0.2739(9) 0.3793(6) -0.3682(7) 0.057 Uani 1 d . .
Sn21 Sn 0.46291(12) 0.34633(8) 0.16906(8) 0.075 Uani 1 d . .
Sn22 Sn 0.61294(12) 0.29167(9) 0.14746(7) 0.070 Uani 1 d . .
Sn23 Sn 0.61081(11) 0.39676(7) 0.17312(7) 0.059 Uani 1 d . .
Sn24 Sn 0.46767(10) 0.34175(7) 0.27523(7) 0.056 Uani 1 d . .
Sn25 Sn 0.47095(10) 0.23680(7) 0.24850(7) 0.056 Uani 1 d . .
Sn26 Sn 0.64041(10) 0.20593(7) 0.24788(6) 0.050 Uani 1 d . .
Sn27 Sn 0.73640(9) 0.31612(7) 0.19661(6) 0.052 Uani 1 d . .
Sn28 Sn 0.63956(9) 0.34995(6) 0.28215(6) 0.045 Uani 1 d . .
Sn29 Sn 0.54106(8) 0.24044(6) 0.33431(6) 0.042 Uani 1 d . .
W210 W 0.72231(5) 0.24415(3) 0.30922(3) 0.038 Uani 1 d . .
C21 C 0.7523(13) 0.1687(9) 0.3429(9) 0.048 Uani 1 d . .
O21 O 0.7691(9) 0.1270(6) 0.3610(6) 0.056 Uani 1 d . .
C22 C 0.7181(10) 0.2477(8) 0.3767(7) 0.031 Uani 1 d . .
O22 O 0.7170(8) 0.2521(6) 0.4164(5) 0.044 Uani 1 d . .
C23 C 0.8340(11) 0.2601(8) 0.2863(8) 0.037 Uani 1 d . .
O23 O 0.9081(10) 0.2707(7) 0.2717(7) 0.065 Uani 1 d . .
K1 K 0.6027(2) 0.6311(2) 0.4639(2) 0.035 Uani 1 d . .
N100 N 0.5176(12) 0.6927(8) 0.5248(8) 0.057 Uani 1 d . .
C101 C 0.4787(18) 0.6529(12) 0.5761(12) 0.084 Uani 1 d . .
H10A H 0.4312(18) 0.6377(12) 0.5723(12) 0.101 Uiso 1 calc R .
H10B H 0.4598(18) 0.6715(12) 0.5993(12) 0.101 Uiso 1 calc R .
C102 C 0.5250(17) 0.6089(12) 0.6023(11) 0.075 Uani 1 d . .
H10C H 0.5765(17) 0.6227(12) 0.6025(11) 0.090 Uiso 1 calc R .
H10D H 0.4962(17) 0.5893(12) 0.6388(11) 0.090 Uiso 1 calc R .
O103 O 0.5382(8) 0.5734(6) 0.5748(6) 0.052 Uani 1 d . .
C104 C 0.5814(11) 0.5298(9) 0.6016(8) 0.043 Uani 1 d . .
H10E H 0.5497(11) 0.5097(9) 0.6372(8) 0.051 Uiso 1 calc R .
H10F H 0.6313(11) 0.5432(9) 0.6042(8) 0.051 Uiso 1 calc R .
C105 C 0.5993(14) 0.4947(10) 0.5741(9) 0.055 Uani 1 d . .
H10G H 0.6276(14) 0.4643(10) 0.5940(9) 0.066 Uiso 1 calc R .
H10H H 0.5491(14) 0.4807(10) 0.5725(9) 0.066 Uiso 1 calc R .
O106 O 0.6479(9) 0.5211(6) 0.5214(6) 0.055 Uani 1 d . .
C107 C 0.6660(15) 0.4889(11) 0.4924(10) 0.063 Uani 1 d . .
H10I H 0.6165(15) 0.4788(11) 0.4863(10) 0.075 Uiso 1 calc R .
H10J H 0.6890(15) 0.4560(11) 0.5130(10) 0.075 Uiso 1 calc R .
C108 C 0.7259(14) 0.5176(10) 0.4386(9) 0.057 Uani 1 d . .
H10K H 0.7763(14) 0.5268(10) 0.4443(9) 0.068 Uiso 1 calc R .
H10L H 0.7372(14) 0.4936(10) 0.4203(9) 0.068 Uiso 1 calc R .
N109 N 0.6909(11) 0.5682(8) 0.4051(7) 0.050 Uani 1 d . .
C110 C 0.7598(16) 0.6010(12) 0.3626(11) 0.070 Uani 1 d . .
H11A H 0.7948(16) 0.5774(12) 0.3501(11) 0.084 Uiso 1 calc R .
H11B H 0.7391(16) 0.6262(12) 0.3331(11) 0.084 Uiso 1 calc R .
C111 C 0.8063(13) 0.6307(10) 0.3797(10) 0.055 Uani 1 d . .
H11C H 0.8274(13) 0.6060(10) 0.4092(10) 0.066 Uiso 1 calc R .
H11D H 0.8517(13) 0.6502(10) 0.3510(10) 0.066 Uiso 1 calc R .
O112 O 0.7561(8) 0.6678(6) 0.3955(6) 0.050 Uani 1 d . .
C113 C 0.8026(12) 0.7058(9) 0.4058(9) 0.045 Uani 1 d . .
H11E H 0.8420(12) 0.7271(9) 0.3739(9) 0.054 Uiso 1 calc R .
H11F H 0.8313(12) 0.6859(9) 0.4331(9) 0.054 Uiso 1 calc R .
C114 C 0.7423(17) 0.7441(12) 0.4243(12) 0.079 Uani 1 d . .
H11G H 0.7727(17) 0.7688(12) 0.4314(12) 0.095 Uiso 1 calc R .
H11H H 0.7169(17) 0.7655(12) 0.3957(12) 0.095 Uiso 1 calc R .
O115 O 0.6873(10) 0.7190(7) 0.4656(7) 0.065 Uani 1 d . .
C116 C 0.6365(14) 0.7561(10) 0.4800(10) 0.061 Uani 1 d . .
H11I H 0.6097(14) 0.7766(10) 0.4518(10) 0.073 Uiso 1 calc R .
H11J H 0.6685(14) 0.7812(10) 0.4856(10) 0.073 Uiso 1 calc R .
C117 C 0.5755(15) 0.7257(11) 0.5295(10) 0.065 Uani 1 d . .
H11K H 0.6037(15) 0.7029(11) 0.5560(10) 0.078 Uiso 1 calc R .
H11L H 0.5469(15) 0.7514(11) 0.5424(10) 0.078 Uiso 1 calc R .
C118 C 0.4570(13) 0.7270(10) 0.4981(9) 0.054 Uani 1 d . .
H11M H 0.4839(13) 0.7605(10) 0.4711(9) 0.065 Uiso 1 calc R .
H11N H 0.4174(13) 0.7359(10) 0.5239(9) 0.065 Uiso 1 calc R .
C119 C 0.4119(14) 0.6994(10) 0.4718(10) 0.058 Uani 1 d . .
H11O H 0.3847(14) 0.6658(10) 0.4985(10) 0.070 Uiso 1 calc R .
H11P H 0.3714(14) 0.7228(10) 0.4566(10) 0.070 Uiso 1 calc R .
O120 O 0.4643(7) 0.6895(5) 0.4343(5) 0.036 Uani 1 d . .
C121 C 0.4247(13) 0.6674(9) 0.4069(9) 0.047 Uani 1 d . .
H12A H 0.3939(13) 0.6345(9) 0.4320(9) 0.056 Uiso 1 calc R .
H12B H 0.3876(13) 0.6930(9) 0.3899(9) 0.056 Uiso 1 calc R .
C122 C 0.4839(14) 0.6559(10) 0.3674(10) 0.058 Uani 1 d . .
H12C H 0.5171(14) 0.6884(10) 0.3440(10) 0.070 Uiso 1 calc R .
H12D H 0.4561(14) 0.6454(10) 0.3463(10) 0.070 Uiso 1 calc R .
O123 O 0.5349(9) 0.6138(6) 0.3902(6) 0.055 Uani 1 d . .
C124 C 0.5818(15) 0.5944(11) 0.3548(10) 0.065 Uani 1 d . .
H12E H 0.6146(15) 0.6242(11) 0.3257(10) 0.078 Uiso 1 calc R .
H12F H 0.5464(15) 0.5801(11) 0.3404(10) 0.078 Uiso 1 calc R .
C125 C 0.6388(14) 0.5490(10) 0.3807(10) 0.057 Uani 1 d . .
H12G H 0.6062(14) 0.5175(10) 0.4074(10) 0.069 Uiso 1 calc R .
H12H H 0.6719(14) 0.5384(10) 0.3538(10) 0.069 Uiso 1 calc R .
K2 K 1.0047(2) 0.4255(2) 0.3832(2) 0.038 Uani 1 d . .
N200 N 0.8842(10) 0.4042(7) 0.3293(7) 0.041 Uani 1 d . .
C201 C 0.8418(11) 0.4499(8) 0.3119(8) 0.039 Uani 1 d . .
H20A H 0.8018(11) 0.4509(8) 0.3420(8) 0.047 Uiso 1 calc R .
H20B H 0.8128(11) 0.4469(8) 0.2873(8) 0.047 Uiso 1 calc R .
C202 C 0.8917(12) 0.5042(9) 0.2844(8) 0.045 Uani 1 d . .
H20C H 0.9360(12) 0.5032(9) 0.2563(8) 0.054 Uiso 1 calc R .
H20D H 0.8579(12) 0.5335(9) 0.2692(8) 0.054 Uiso 1 calc R .
O203 O 0.9214(8) 0.5117(6) 0.3236(5) 0.041 Uani 1 d . .
C204 C 0.9678(11) 0.5616(8) 0.3008(8) 0.038 Uani 1 d . .
H20E H 0.9348(11) 0.5910(8) 0.2846(8) 0.046 Uiso 1 calc R .
H20F H 1.0136(11) 0.5608(8) 0.2734(8) 0.046 Uiso 1 calc R .
C205 C 0.9972(14) 0.5706(10) 0.3436(9) 0.056 Uani 1 d . .
H20G H 1.0198(14) 0.6071(10) 0.3307(9) 0.067 Uiso 1 calc R .
H20H H 0.9535(14) 0.5640(10) 0.3745(9) 0.067 Uiso 1 calc R .
O206 O 1.0617(8) 0.5297(6) 0.3564(6) 0.045 Uani 1 d . .
C207 C 1.1034(13) 0.5427(9) 0.3912(9) 0.046 Uani 1 d . .
H20I H 1.0653(13) 0.5399(9) 0.4236(9) 0.055 Uiso 1 calc R .
H20J H 1.1273(13) 0.5792(9) 0.3732(9) 0.055 Uiso 1 calc R .
C208 C 1.1678(12) 0.5027(9) 0.4035(8) 0.043 Uani 1 d . .
H20K H 1.2040(12) 0.5049(9) 0.3707(8) 0.051 Uiso 1 calc R .
H20L H 1.1992(12) 0.5116(9) 0.4239(8) 0.051 Uiso 1 calc R .
N209 N 1.1323(10) 0.4469(7) 0.4339(7) 0.040 Uani 1 d . .
C210 C 1.1966(13) 0.4054(9) 0.4366(9) 0.050 Uani 1 d . .
H21A H 1.1746(13) 0.3707(9) 0.4640(9) 0.060 Uiso 1 calc R .
H21B H 1.2422(13) 0.4162(9) 0.4462(9) 0.060 Uiso 1 calc R .
C211 C 1.2251(13) 0.3998(9) 0.3850(9) 0.048 Uani 1 d . .
H21C H 1.2444(13) 0.4349(9) 0.3572(9) 0.058 Uiso 1 calc R .
H21D H 1.2700(13) 0.3762(9) 0.3872(9) 0.058 Uiso 1 calc R .
O212 O 1.1634(8) 0.3788(6) 0.3720(5) 0.041 Uani 1 d . .
C213 C 1.1893(14) 0.3683(11) 0.3272(10) 0.063 Uani 1 d . .
H21E H 1.2353(14) 0.3457(11) 0.3311(10) 0.075 Uiso 1 calc R .
H21F H 1.2073(14) 0.4021(11) 0.2969(10) 0.075 Uiso 1 calc R .
C214 C 1.1220(14) 0.3394(11) 0.3155(10) 0.060 Uani 1 d . .
H21G H 1.1430(14) 0.3334(11) 0.2834(10) 0.072 Uiso 1 calc R .
H21H H 1.1049(14) 0.3047(11) 0.3446(10) 0.072 Uiso 1 calc R .
O215 O 1.0553(8) 0.3739(6) 0.3094(6) 0.044 Uani 1 d . .
C216 C 0.9898(15) 0.3472(11) 0.3037(10) 0.061 Uani 1 d . .
H21I H 0.9666(15) 0.3176(11) 0.3371(10) 0.074 Uiso 1 calc R .
H21J H 1.0088(15) 0.3327(11) 0.2771(10) 0.074 Uiso 1 calc R .
C217 C 0.9256(14) 0.3891(10) 0.2871(10) 0.056 Uani 1 d . .
H21K H 0.9517(14) 0.4210(10) 0.2571(10) 0.067 Uiso 1 calc R .
H21L H 0.8863(14) 0.3741(10) 0.2758(10) 0.067 Uiso 1 calc R .
C218 C 0.8278(13) 0.3569(10) 0.3721(9) 0.052 Uani 1 d . .
H21M H 0.7817(13) 0.3535(10) 0.3585(9) 0.062 Uiso 1 calc R .
H21N H 0.8564(13) 0.3238(10) 0.3785(9) 0.062 Uiso 1 calc R .
C219 C 0.7986(14) 0.3622(10) 0.4218(10) 0.059 Uani 1 d . .
H21O H 0.7665(14) 0.3939(10) 0.4161(10) 0.071 Uiso 1 calc R .
H21P H 0.7637(14) 0.3309(10) 0.4464(10) 0.071 Uiso 1 calc R .
O220 O 0.8627(8) 0.3671(6) 0.4448(5) 0.041 Uani 1 d . .
C221 C 0.8310(11) 0.3726(9) 0.4936(8) 0.043 Uani 1 d . .
H22A H 0.7860(11) 0.3466(9) 0.5146(8) 0.052 Uiso 1 calc R .
H22B H 0.8117(11) 0.4086(9) 0.4868(8) 0.052 Uiso 1 calc R .
C222 C 0.9001(12) 0.3624(8) 0.5243(8) 0.042 Uani 1 d . .
H22C H 0.8791(12) 0.3640(8) 0.5585(8) 0.050 Uiso 1 calc R .
H22D H 0.9203(12) 0.3268(8) 0.5301(8) 0.050 Uiso 1 calc R .
O223 O 0.9697(7) 0.4060(5) 0.4915(5) 0.037 Uani 1 d . .
C224 C 1.0343(12) 0.3937(9) 0.5164(8) 0.044 Uani 1 d . .
H22E H 1.0592(12) 0.3614(9) 0.5143(8) 0.053 Uiso 1 calc R .
H22F H 1.0160(12) 0.3878(9) 0.5534(8) 0.053 Uiso 1 calc R .
C225 C 1.0907(12) 0.4394(9) 0.4887(8) 0.045 Uani 1 d . .
H22G H 1.1313(12) 0.4357(9) 0.5089(8) 0.054 Uiso 1 calc R .
H22H H 1.0622(12) 0.4717(9) 0.4873(8) 0.054 Uiso 1 calc R .
K3 K 0.0905(3) 0.1316(2) 0.4602(2) 0.044 Uani 1 d . .
N300 N 0.0003(14) 0.1885(10) 0.5213(9) 0.075 Uani 1 d . .
C301 C 0.0603(20) 0.2222(15) 0.5300(14) 0.098 Uani 1 d . .
H30A H 0.0311(20) 0.2484(15) 0.5417(14) 0.117 Uiso 1 calc R .
H30K H 0.0852(20) 0.1987(15) 0.5581(14) 0.117 Uiso 1 calc R .
C302 C 0.1137(22) 0.2461(16) 0.4906(15) 0.116 Uani 1 d . .
H30B H 0.1432(22) 0.2708(16) 0.4983(15) 0.139 Uiso 1 calc R .
H30L H 0.0881(22) 0.2679(16) 0.4622(15) 0.139 Uiso 1 calc R .
O303 O 0.1734(12) 0.2129(9) 0.4706(8) 0.088 Uani 1 d . .
C304 C 0.2346(19) 0.2377(14) 0.4257(13) 0.092 Uani 1 d . .
H30C H 0.2649(19) 0.2633(14) 0.4317(13) 0.110 Uiso 1 calc R .
H30D H 0.2099(19) 0.2581(14) 0.3964(13) 0.110 Uiso 1 calc R .
C305 C 0.2916(22) 0.2017(16) 0.4099(15) 0.115 Uani 1 d . .
H30E H 0.3363(22) 0.2227(16) 0.3815(15) 0.139 Uiso 1 calc R .
H30F H 0.3131(22) 0.1780(16) 0.4396(15) 0.139 Uiso 1 calc R .
O306 O 0.2501(11) 0.1722(8) 0.3932(8) 0.080 Uani 1 d . .
C307 C 0.3010(21) 0.1299(15) 0.3837(14) 0.103 Uani 1 d . .
H30G H 0.3092(21) 0.1030(15) 0.4171(14) 0.124 Uiso 1 calc R .
H30H H 0.3534(21) 0.1457(15) 0.3612(14) 0.124 Uiso 1 calc R .
C308 C 0.2584(22) 0.1036(16) 0.3569(15) 0.111 Uani 1 d . .
H30I H 0.2411(22) 0.1307(16) 0.3270(15) 0.133 Uiso 1 calc R .
H30J H 0.2938(22) 0.0797(16) 0.3448(15) 0.133 Uiso 1 calc R .
N309 N 0.1884(16) 0.0729(12) 0.3986(11) 0.094 Uani 1 d . .
C310 C 0.1344(20) 0.0572(14) 0.3689(14) 0.100 Uani 1 d . .
H31A H 0.0994(20) 0.0260(14) 0.3936(14) 0.120 Uiso 1 calc R .
H31B H 0.1683(20) 0.0475(14) 0.3417(14) 0.120 Uiso 1 calc R .
C311 C 0.0798(17) 0.1066(12) 0.3421(11) 0.076 Uani 1 d . .
H31C H 0.1147(17) 0.1370(12) 0.3156(11) 0.092 Uiso 1 calc R .
H31D H 0.0456(17) 0.0955(12) 0.3246(11) 0.092 Uiso 1 calc R .
O312 O 0.0335(10) 0.1216(8) 0.3790(7) 0.070 Uani 1 d . .
C313 C -0.0218(16) 0.1615(12) 0.3572(11) 0.070 Uani 1 d . .
H31E H 0.0090(16) 0.1949(12) 0.3333(11) 0.084 Uiso 1 calc R .
H31F H -0.0482(16) 0.1495(12) 0.3364(11) 0.084 Uiso 1 calc R .
C314 C -0.0828(13) 0.1725(10) 0.3955(9) 0.053 Uani 1 d . .
H31G H -0.1152(13) 0.1398(10) 0.4195(9) 0.063 Uiso 1 calc R .
H31H H -0.1182(13) 0.1992(10) 0.3779(9) 0.063 Uiso 1 calc R .
O315 O -0.0422(9) 0.1933(6) 0.4258(6) 0.055 Uani 1 d . .
C316 C -0.1012(17) 0.1996(13) 0.4676(12) 0.083 Uani 1 d . .
H31I H -0.1253(17) 0.1647(13) 0.4932(12) 0.099 Uiso 1 calc R .
H31J H -0.1436(17) 0.2218(13) 0.4535(12) 0.099 Uiso 1 calc R .
C317 C -0.0618(20) 0.2246(14) 0.4921(14) 0.099 Uani 1 d . .
H31K H -0.1023(20) 0.2336(14) 0.5173(14) 0.119 Uiso 1 calc R .
H31L H -0.0343(20) 0.2580(14) 0.4653(14) 0.119 Uiso 1 calc R .
C318 C -0.0546(21) 0.1432(15) 0.5710(14) 0.111 Uani 1 d . .
H31M H -0.0898(21) 0.1252(15) 0.5596(14) 0.133 Uiso 1 calc R .
H31N H -0.0880(21) 0.1591(15) 0.5934(14) 0.133 Uiso 1 calc R .
C319 C 0.0008(21) 0.1014(15) 0.6026(15) 0.108 Uani 1 d . .
H31O H 0.0498(21) 0.1186(15) 0.6022(15) 0.130 Uiso 1 calc R .
H31P H -0.0274(21) 0.0804(15) 0.6389(15) 0.130 Uiso 1 calc R .
O320 O 0.0175(9) 0.0680(7) 0.5706(7) 0.065 Uani 1 d . .
C321 C 0.0645(16) 0.0226(12) 0.5987(11) 0.074 Uani 1 d . .
H32A H 0.1102(16) 0.0365(12) 0.6056(11) 0.089 Uiso 1 calc R .
H32B H 0.0307(16) -0.0008(12) 0.6324(11) 0.089 Uiso 1 calc R .
C322 C 0.0927(17) -0.0075(12) 0.5669(11) 0.078 Uani 1 d . .
H32C H 0.0462(17) -0.0245(12) 0.5639(11) 0.094 Uiso 1 calc R .
H32H H 0.1250(17) -0.0361(12) 0.5853(11) 0.094 Uiso 1 calc R .
O323 O 0.1406(10) 0.0234(7) 0.5137(7) 0.065 Uani 1 d . .
C324 C 0.1577(18) -0.0109(13) 0.4840(12) 0.087 Uani 1 d . .
H32D H 0.1097(18) -0.0182(13) 0.4744(12) 0.105 Uiso 1 calc R .
H32E H 0.1788(18) -0.0449(13) 0.5042(12) 0.105 Uiso 1 calc R .
C325 C 0.2190(17) 0.0223(12) 0.4370(11) 0.080 Uani 1 d . .
H32F H 0.2421(17) 0.0002(12) 0.4180(11) 0.096 Uiso 1 calc R .
H32G H 0.2620(17) 0.0331(12) 0.4487(11) 0.096 Uiso 1 calc R .
K4 K 0.4922(3) 0.0726(2) 0.6135(2) 0.043 Uani 1 d . .
N400 N 0.3629(13) 0.0485(10) 0.5633(9) 0.072 Uani 1 d . .
C401 C 0.2929(16) 0.0868(12) 0.5663(11) 0.073 Uani 1 d . .
H40A H 0.3094(16) 0.1229(12) 0.5395(11) 0.087 Uiso 1 calc R .
H40B H 0.2463(16) 0.0744(12) 0.5590(11) 0.087 Uiso 1 calc R .
C402 C 0.2708(19) 0.0887(14) 0.6179(12) 0.090 Uani 1 d . .
H40C H 0.2209(19) 0.1073(14) 0.6208(12) 0.108 Uiso 1 calc R .
H40D H 0.2609(19) 0.0521(14) 0.6448(12) 0.108 Uiso 1 calc R .
O403 O 0.3331(11) 0.1162(8) 0.6284(8) 0.076 Uani 1 d . .
C404 C 0.3018(17) 0.1210(13) 0.6758(12) 0.081 Uani 1 d . .
H40E H 0.2888(17) 0.0859(13) 0.7050(12) 0.097 Uiso 1 calc R .
H40F H 0.2539(17) 0.1419(13) 0.6744(12) 0.097 Uiso 1 calc R .
C405 C 0.3733(15) 0.1512(11) 0.6810(11) 0.066 Uani 1 d . .
H40G H 0.3838(15) 0.1859(11) 0.6510(11) 0.079 Uiso 1 calc R .
H40H H 0.3555(15) 0.1585(11) 0.7126(11) 0.079 Uiso 1 calc R .
O406 O 0.4457(12) 0.1259(8) 0.6836(7) 0.077 Uani 1 d . .
C407 C 0.5016(19) 0.1503(14) 0.6856(13) 0.091 Uani 1 d . .
H40I H 0.4801(19) 0.1686(14) 0.7088(13) 0.109 Uiso 1 calc R .
H40J H 0.5216(19) 0.1781(14) 0.6504(13) 0.109 Uiso 1 calc R .
C408 C 0.5785(23) 0.1179(17) 0.7052(15) 0.118 Uani 1 d . .
H40K H 0.6182(23) 0.1419(17) 0.7062(15) 0.141 Uiso 1 calc R .
H40L H 0.5621(23) 0.0888(17) 0.7400(15) 0.141 Uiso 1 calc R .
N409 N 0.6110(14) 0.0965(11) 0.6632(10) 0.082 Uani 1 d . .
C410 C 0.6637(17) 0.1420(12) 0.6248(11) 0.076 Uani 1 d . .
H41A H 0.7097(17) 0.1446(12) 0.6387(11) 0.091 Uiso 1 calc R .
H41B H 0.6348(17) 0.1749(12) 0.6191(11) 0.091 Uiso 1 calc R .
C411 C 0.6960(14) 0.1367(11) 0.5686(10) 0.061 Uani 1 d . .
H41C H 0.7305(14) 0.1681(11) 0.5438(10) 0.073 Uiso 1 calc R .
H41D H 0.7275(14) 0.1049(11) 0.5735(10) 0.073 Uiso 1 calc R .
O412 O 0.6332(11) 0.1329(8) 0.5496(7) 0.074 Uani 1 d . .
C413 C 0.6600(18) 0.1253(14) 0.5050(12) 0.087 Uani 1 d . .
H41E H 0.6770(18) 0.0886(14) 0.5134(12) 0.104 Uiso 1 calc R .
H41P H 0.7064(18) 0.1498(14) 0.4832(12) 0.104 Uiso 1 calc R .
C414 C 0.5900(14) 0.1360(10) 0.4731(10) 0.058 Uani 1 d . .
H41F H 0.5681(14) 0.1710(10) 0.4683(10) 0.070 Uiso 1 calc R .
H41G H 0.6115(14) 0.1356(10) 0.4384(10) 0.070 Uiso 1 calc R .
O415 O 0.5255(10) 0.0923(7) 0.5045(7) 0.066 Uani 1 d . .
C416 C 0.4584(15) 0.1059(11) 0.4783(11) 0.071 Uani 1 d . .
H41H H 0.4760(15) 0.1114(11) 0.4414(11) 0.085 Uiso 1 calc R .
H41I H 0.4335(15) 0.1381(11) 0.4806(11) 0.085 Uiso 1 calc R .
C417 C 0.3990(16) 0.0554(12) 0.5101(11) 0.074 Uani 1 d . .
H41J H 0.3565(16) 0.0583(12) 0.4915(11) 0.088 Uiso 1 calc R .
H41K H 0.4281(16) 0.0235(12) 0.5108(11) 0.088 Uiso 1 calc R .
C418 C 0.3348(18) -0.0037(13) 0.5917(12) 0.086 Uani 1 d . .
H41L H 0.3055(18) -0.0140(13) 0.5712(12) 0.103 Uiso 1 calc R .
H41M H 0.2966(18) -0.0058(13) 0.6238(12) 0.103 Uiso 1 calc R .
C419 C 0.3994(17) -0.0450(12) 0.6074(12) 0.079 Uani 1 d . .
H41N H 0.3742(17) -0.0811(12) 0.6260(12) 0.094 Uiso 1 calc R .
H41O H 0.4384(17) -0.0437(12) 0.5759(12) 0.094 Uiso 1 calc R .
O420 O 0.4388(11) -0.0326(7) 0.6404(7) 0.075 Uani 1 d . .
C421 C 0.5067(13) -0.0700(10) 0.6548(9) 0.052 Uani 1 d . .
H42A H 0.5481(13) -0.0644(10) 0.6230(9) 0.062 Uiso 1 calc R .
H42B H 0.4858(13) -0.1072(10) 0.6698(9) 0.062 Uiso 1 calc R .
C422 C 0.5434(16) -0.0601(11) 0.6938(10) 0.069 Uani 1 d . .
H42C H 0.5011(16) -0.0615(11) 0.7240(10) 0.082 Uiso 1 calc R .
H42D H 0.5804(16) -0.0881(11) 0.7065(10) 0.082 Uiso 1 calc R .
O423 O 0.5837(10) -0.0112(7) 0.6709(7) 0.062 Uani 1 d . .
C424 C 0.6073(17) -0.0038(12) 0.7136(11) 0.076 Uani 1 d . .
H42E H 0.6382(17) -0.0335(12) 0.7317(11) 0.091 Uiso 1 calc R .
H42F H 0.5606(17) -0.0004(12) 0.7390(11) 0.091 Uiso 1 calc R .
C425 C 0.6635(18) 0.0532(13) 0.6819(12) 0.086 Uani 1 d . .
H42G H 0.6913(18) 0.0592(13) 0.7056(12) 0.103 Uiso 1 calc R .
H42H H 0.7037(18) 0.0513(13) 0.6523(12) 0.103 Uiso 1 calc R .
K5 K 1.0579(4) 0.5409(3) 0.0965(2) 0.069 Uani 1 d . .
N500 N 0.9819(13) 0.6464(9) 0.0958(9) 0.069 Uani 1 d . .
C501 C 0.9875(14) 0.6504(11) 0.1431(10) 0.061 Uiso 1 d . .
C502 C 1.0697(15) 0.6360(11) 0.1583(10) 0.067 Uiso 1 d . .
O503 O 1.0811(10) 0.5789(7) 0.1698(7) 0.066 Uani 1 d . .
C504 C 1.1559(17) 0.5670(13) 0.1868(12) 0.079 Uiso 1 d . .
C505 C 1.1600(19) 0.5047(14) 0.2025(14) 0.094 Uiso 1 d . .
O506 O 1.1703(13) 0.4907(9) 0.1594(9) 0.094 Uani 1 d . .
C507 C 1.1766(26) 0.4313(20) 0.1798(18) 0.138 Uiso 1 d . .
C508 C 1.1885(22) 0.4198(15) 0.1264(15) 0.103 Uiso 1 d . .
N509 N 1.1413(21) 0.4360(15) 0.1032(14) 0.127 Uani 1 d . .
C510 C 1.1597(21) 0.4430(15) 0.0414(14) 0.101 Uiso 1 d . .
C511 C 1.2027(29) 0.4998(22) 0.0060(19) 0.144 Uiso 1 d . .
O512 O 1.1575(22) 0.5365(18) 0.0089(15) 0.177 Uani 1 d . .
C513 C 1.1786(36) 0.5862(29) -0.0249(25) 0.186 Uiso 1 d . .
C514 C 1.1467(37) 0.6332(26) -0.0454(24) 0.188 Uiso 1 d . .
O515 O 1.0980(16) 0.6392(11) 0.0064(10) 0.116 Uani 1 d . .
C516 C 1.0527(21) 0.6776(15) 0.0037(14) 0.099 Uiso 1 d . .
C517 C 1.0269(23) 0.6933(16) 0.0491(16) 0.114 Uiso 1 d . .
C518 C 0.8967(25) 0.6385(18) 0.0894(16) 0.126 Uiso 1 d . .
C519 C 0.8492(23) 0.5813(17) 0.1328(15) 0.112 Uiso 1 d . .
O520 O 0.8890(23) 0.5519(14) 0.1053(17) 0.118 Uani 1 d . .
C521 C 0.8796(47) 0.5350(30) 0.1048(35) 0.161 Uiso 1 d . .
C522 C 0.8628(27) 0.4894(21) 0.1313(18) 0.135 Uiso 1 d . .
O523 O 0.9598(23) 0.4442(17) 0.1356(15) 0.194 Uani 1 d . .
C524 C 0.9853(25) 0.4028(18) 0.1184(17) 0.128 Uiso 1 d . .
C525 C 1.0686(26) 0.3868(19) 0.1317(17) 0.133 Uiso 1 d . .
K6 K -0.0192(4) 0.1304(3) 0.1072(2) 0.078 Uani 1 d . .
N600 N -0.0720(10) 0.1767(8) 0.1858(7) 0.050 Uiso 1 d . .
C601 C -0.0756(31) 0.2423(22) 0.1405(20) 0.167 Uiso 1 d . .
C602 C -0.1776(26) 0.2014(19) 0.1469(18) 0.140 Uiso 1 d . .
O603 O -0.1385(12) 0.2031(8) 0.0952(8) 0.083 Uiso 1 d . .
C604 C -0.1939(29) 0.1922(20) 0.0697(20) 0.152 Uiso 1 d . .
C605 C -0.1576(28) 0.1886(20) 0.0222(19) 0.139 Uiso 1 d . .
O606 O -0.1210(16) 0.1396(12) 0.0380(11) 0.122 Uiso 1 d . .
C607 C -0.0747(27) 0.1355(20) -0.0109(18) 0.138 Uiso 1 d . .
C608 C -0.0560(25) 0.0781(19) 0.0104(17) 0.128 Uiso 1 d . .
N609 N 0.0574(11) 0.1020(8) 0.0221(7) 0.050 Uiso 1 d . .
C610 C -0.0047(35) 0.1799(25) 0.2060(24) 0.182 Uiso 1 d . .
C611 C 0.0128(36) 0.2160(25) 0.1587(24) 0.174 Uiso 1 d . .
O612 O 0.0920(13) 0.2092(9) 0.1203(10) 0.102 Uiso 1 d . .
C613 C 0.1155(27) 0.1984(19) 0.0757(19) 0.135 Uiso 1 d . .
C614 C 0.1830(25) 0.2033(17) 0.0461(16) 0.123 Uiso 1 d . .
O615 O 0.1316(14) 0.1815(10) 0.0247(10) 0.108 Uiso 1 d . .
C616 C 0.1590(13) 0.1488(10) -0.0014(9) 0.050 Uiso 1 d . .
C617 C 0.1114(13) 0.1272(9) -0.0117(9) 0.050 Uiso 1 d . .
C618 C 0.0758(13) 0.0482(9) 0.0360(9) 0.050 Uiso 1 d . .
C619 C -0.0094(13) 0.0089(9) 0.0846(9) 0.050 Uiso 1 d . .
O620 O -0.0577(8) 0.0098(6) 0.1389(6) 0.050 Uiso 1 d . .
C621 C -0.1375(13) 0.0235(9) 0.1918(9) 0.050 Uiso 1 d . .
C622 C -0.1523(13) 0.0495(9) 0.2360(9) 0.050 Uiso 1 d . .
O623 O -0.0789(8) 0.0707(6) 0.2153(6) 0.050 Uiso 1 d . .
C624 C -0.0892(13) 0.0866(10) 0.2496(9) 0.050 Uiso 1 d . .
C625 C -0.1060(13) 0.1343(10) 0.2368(9) 0.050 Uiso 1 d . .
K7 K 1.4760(4) 0.6277(3) 0.1123(3) 0.077 Uani 1 d . .
N700 N 1.5280(22) 0.7043(16) 0.1630(15) 0.142 Uiso 1 d . .
C701 C 1.6187(13) 0.7177(9) 0.1359(9) 0.050 Uiso 1 d . .
C702 C 1.6374(13) 0.7050(9) 0.1014(9) 0.050 Uiso 1 d . .
O703 O 1.6386(8) 0.6830(6) 0.0693(6) 0.050 Uiso 1 d . .
C704 C 1.6420(13) 0.6702(10) 0.0277(9) 0.050 Uiso 1 d . .
C705 C 1.6480(13) 0.6447(10) 0.0032(9) 0.050 Uiso 1 d . .
O706 O 1.5777(8) 0.6078(6) 0.0352(6) 0.050 Uiso 1 d . .
C707 C 1.5721(13) 0.5558(10) 0.0292(9) 0.050 Uiso 1 d . .
C708 C 1.5098(13) 0.5211(9) 0.0651(9) 0.050 Uiso 1 d . .
N709 N 1.4345(21) 0.5490(15) 0.0749(14) 0.142 Uiso 1 d . .
C710 C 1.3655(13) 0.5053(9) 0.1170(9) 0.050 Uiso 1 d . .
C711 C 1.4340(13) 0.5072(10) 0.1407(9) 0.050 Uiso 1 d . .
O712 O 1.3562(8) 0.5324(6) 0.1873(6) 0.050 Uiso 1 d . .
C713 C 1.3614(13) 0.5287(10) 0.2340(9) 0.050 Uiso 1 d . .
C714 C 1.3532(13) 0.5641(10) 0.2462(9) 0.050 Uiso 1 d . .
O715 O 1.4221(8) 0.5898(6) 0.2275(6) 0.050 Uiso 1 d . .
C716 C 1.4162(13) 0.6374(9) 0.2468(9) 0.050 Uiso 1 d . .
C717 C 1.4923(13) 0.6666(10) 0.2245(9) 0.050 Uiso 1 d . .
C718 C 1.4652(13) 0.7407(10) 0.1506(9) 0.050 Uiso 1 d . .
O720 O 1.3717(18) 0.7140(13) 0.0940(12) 0.148 Uiso 1 d . .
C721 C 1.3233(13) 0.7073(10) 0.0494(9) 0.050 Uiso 1 d . .
C722 C 1.3619(13) 0.6971(10) 0.0167(9) 0.050 Uiso 1 d . .
O723 O 1.3708(9) 0.6492(6) 0.0441(6) 0.050 Uiso 1 d . .
C724 C 1.4105(13) 0.6334(10) -0.0018(9) 0.050 Uiso 1 d . .
C725 C 1.4223(13) 0.5788(10) 0.0233(9) 0.050 Uiso 1 d . .
K8 K 0.4421(5) -0.0401(4) 0.9071(4) 0.126 Uani 1 d . .
N11 N 0.5175(11) -0.1383(8) 0.9007(7) 0.050 Uiso 1 d . .
C1 C 0.5150(13) -0.1470(9) 0.8568(9) 0.050 Uiso 1 d . .
C2 C 0.4306(13) -0.1283(10) 0.8385(9) 0.050 Uiso 1 d . .
O3 O 0.4168(9) -0.0773(6) 0.8320(6) 0.050 Uiso 1 d . .
C3 C 0.3432(13) -0.0601(10) 0.8134(9) 0.050 Uiso 1 d . .
C4 C 0.3400(13) 0.0032(10) 0.7929(9) 0.050 Uiso 1 d . .
O4 O 0.3267(9) 0.0107(6) 0.8423(6) 0.050 Uiso 1 d . .
C9 C 0.3212(13) 0.0716(10) 0.8139(9) 0.050 Uiso 1 d . .
C10 C 0.3210(13) 0.1036(9) 0.8636(9) 0.050 Uiso 1 d . .
C5 C 0.4164(13) 0.1009(10) 0.8699(9) 0.050 Uiso 1 d . .
N630 N 0.1077(28) 0.0527(20) 0.1738(18) 0.186 Uiso 1 d . .
C631 C 0.1441(37) 0.0827(27) 0.1867(25) 0.194 Uiso 1 d . .
C632 C 0.1826(33) 0.0406(24) 0.2297(22) 0.162 Uiso 1 d . .
N633 N 0.1144(27) 0.0006(19) 0.2683(18) 0.170 Uiso 1 d . .
C732 C 1.6445(13) 0.5740(10) 0.1938(9) 0.050 Uiso 1 d . .
N732 N 1.6082(11) 0.5477(8) 0.1750(7) 0.050 Uiso 1 d . .
C731 C 1.6739(35) 0.5342(24) 0.2381(23) 0.172 Uiso 1 d . .
N733 N 1.6012(25) 0.5041(18) 0.2677(17) 0.156 Uiso 1 d . .
C719 C 1.4142(13) 0.7572(9) 0.1139(9) 0.050 Uiso 1 d . .
O89 O 0.3279(9) -0.0356(6) 0.9859(6) 0.050 Uiso 1 d . .
O5 O 0.6107(9) -0.0417(6) 0.8992(6) 0.050 Uiso 1 d . .
C130 C 0.5832(13) 0.0754(9) 0.8348(9) 0.050 Uiso 1 d . .
C8 C 0.6283(13) 0.0108(10) 0.8761(9) 0.050 Uiso 1 d . .
O40 O 0.5177(9) 0.0635(6) 0.8609(6) 0.050 Uiso 1 d . .
C6 C 0.5963(13) -0.1378(10) 0.9200(9) 0.050 Uiso 1 d . .
C68 C 0.3302(13) -0.0918(10) 1.0306(9) 0.050 Uiso 1 d . .
C56 C 1.3498(13) 0.8666(10) 0.0377(9) 0.050 Uiso 1 d . .
C67 C 0.4884(13) -0.1878(10) 0.9385(9) 0.050 Uiso 1 d . .
C567 C 0.4968(13) 0.0862(9) 0.9003(9) 0.050 Uiso 1 d . .
C7 C 0.6396(13) -0.0727(10) 0.8679(9) 0.050 Uiso 1 d . .
N10 N 0.3395(11) 0.0591(8) 0.9037(7) 0.050 Uiso 1 d . .
C65 C 0.3252(13) 0.0617(10) 0.9527(9) 0.050 Uiso 1 d . .
O97 O 0.4150(9) -0.1473(6) 1.0039(6) 0.050 Uiso 1 d . .
C90 C 0.2729(13) -0.0054(10) 0.9887(9) 0.050 Uiso 1 d . .
C900 C 0.4539(13) -0.1871(10) 0.9866(9) 0.050 Uiso 1 d . .
 
loop_
  _atom_site_aniso_label
  _atom_site_aniso_U_11
  _atom_site_aniso_U_22
  _atom_site_aniso_U_33
  _atom_site_aniso_U_23
  _atom_site_aniso_U_13
  _atom_site_aniso_U_12
Sn11 0.132 0.054 0.063 0.012 -0.056 -0.028
Sn12 0.145 0.058 0.033 0.002 -0.032 -0.029
Sn13 0.101 0.037 0.050 0.009 -0.023 -0.027
Sn14 0.068 0.053 0.059 -0.001 -0.026 -0.012
Sn15 0.102 0.045 0.051 0.008 -0.041 -0.034
Sn16 0.106 0.036 0.038 -0.005 -0.027 -0.025
Sn17 0.086 0.043 0.037 -0.003 -0.002 -0.026
Sn18 0.059 0.040 0.049 -0.015 -0.015 -0.012
Sn19 0.056 0.047 0.033 0.002 -0.015 -0.022
W110 0.056 0.033 0.035 -0.010 -0.010 -0.014
C11 0.054 0.050 0.054 -0.024 -0.005 0.000
O11 0.076 0.065 0.072 -0.034 -0.013 -0.002
C12 0.040 0.036 0.040 -0.012 -0.012 -0.004
O12 0.059 0.041 0.031 -0.014 -0.002 -0.002
C13 0.035 0.035 0.035 -0.014 -0.008 0.002
O13 0.056 0.042 0.072 -0.018 -0.021 -0.002
Sn21 0.083 0.067 0.074 -0.013 -0.038 -0.015
Sn22 0.084 0.081 0.046 -0.026 -0.013 -0.019
Sn23 0.070 0.044 0.050 -0.001 -0.018 -0.018
Sn24 0.051 0.049 0.061 -0.016 -0.012 0.000
Sn25 0.057 0.050 0.060 -0.018 -0.016 -0.018
Sn26 0.060 0.051 0.047 -0.028 -0.007 -0.012
Sn27 0.053 0.053 0.038 -0.012 0.004 -0.018
Sn28 0.054 0.033 0.049 -0.017 -0.010 -0.006
Sn29 0.040 0.039 0.038 -0.012 0.001 -0.009
W210 0.042 0.034 0.037 -0.016 -0.002 -0.008
C21 0.048 0.046 0.049 -0.019 -0.006 -0.004
O21 0.056 0.042 0.067 -0.019 -0.011 -0.003
C22 0.028 0.033 0.036 -0.017 -0.006 -0.002
O22 0.053 0.045 0.039 -0.025 -0.004 -0.003
C23 0.041 0.032 0.040 -0.017 -0.006 -0.004
O23 0.069 0.069 0.064 -0.043 0.000 0.004
K1 0.038 0.030 0.038 -0.017 -0.004 0.007
N100 0.061 0.056 0.054 -0.025 -0.012 0.018
C101 0.090 0.079 0.084 -0.037 -0.011 0.011
C102 0.082 0.073 0.071 -0.030 -0.018 0.011
O103 0.051 0.051 0.045 -0.015 -0.005 0.012
C104 0.030 0.042 0.046 -0.010 -0.005 0.001
C105 0.056 0.055 0.049 -0.017 -0.009 0.003
O106 0.059 0.047 0.059 -0.026 -0.006 0.016
C107 0.067 0.058 0.063 -0.027 -0.010 0.008
C108 0.055 0.057 0.055 -0.021 -0.009 0.004
N109 0.049 0.044 0.054 -0.021 -0.007 0.008
C110 0.073 0.071 0.067 -0.031 -0.012 0.012
C111 0.051 0.053 0.055 -0.020 -0.006 0.008
O112 0.045 0.055 0.049 -0.020 -0.011 0.003
C113 0.036 0.045 0.048 -0.014 -0.008 -0.003
C114 0.078 0.076 0.083 -0.031 -0.019 0.004
O115 0.072 0.056 0.071 -0.030 -0.018 0.007
C116 0.066 0.057 0.064 -0.028 -0.016 -0.002
C117 0.070 0.063 0.068 -0.033 -0.017 0.012
C118 0.051 0.054 0.056 -0.022 -0.008 0.011
C119 0.056 0.055 0.060 -0.023 -0.006 0.008
O120 0.032 0.040 0.040 -0.019 -0.011 0.001
C121 0.053 0.045 0.049 -0.026 -0.011 0.001
C122 0.059 0.056 0.057 -0.022 -0.013 0.008
O123 0.059 0.051 0.057 -0.024 -0.014 0.008
C124 0.070 0.068 0.063 -0.032 -0.016 0.005
C125 0.059 0.057 0.057 -0.029 -0.007 0.010
K2 0.041 0.033 0.039 -0.012 -0.006 -0.009
N200 0.040 0.037 0.046 -0.014 -0.011 -0.002
C201 0.036 0.039 0.042 -0.016 -0.009 0.000
C202 0.044 0.045 0.044 -0.017 -0.006 0.000
O203 0.048 0.038 0.039 -0.016 -0.009 0.002
C204 0.032 0.037 0.038 -0.008 -0.007 -0.001
C205 0.061 0.050 0.059 -0.026 -0.012 0.005
O206 0.045 0.039 0.047 -0.016 -0.008 0.001
C207 0.050 0.044 0.044 -0.017 -0.015 -0.006
C208 0.040 0.044 0.044 -0.015 -0.011 -0.006
N209 0.043 0.038 0.040 -0.015 -0.007 -0.006
C210 0.051 0.048 0.052 -0.016 -0.017 0.002
C211 0.050 0.048 0.047 -0.017 -0.012 -0.002
O212 0.047 0.037 0.039 -0.015 -0.014 0.004
C213 0.059 0.062 0.061 -0.021 -0.010 0.005
C214 0.057 0.061 0.064 -0.024 -0.018 -0.002
O215 0.050 0.039 0.047 -0.019 -0.014 0.004
C216 0.067 0.062 0.061 -0.030 -0.018 0.004
C217 0.059 0.056 0.058 -0.027 -0.016 -0.002
C218 0.053 0.052 0.052 -0.022 -0.013 0.001
C219 0.055 0.056 0.063 -0.019 -0.015 -0.004
O220 0.038 0.041 0.041 -0.015 -0.007 -0.006
C221 0.034 0.042 0.050 -0.015 -0.010 -0.003
C222 0.047 0.037 0.040 -0.017 -0.007 0.003
O223 0.035 0.035 0.036 -0.012 -0.001 0.000
C224 0.045 0.042 0.042 -0.015 -0.006 0.003
C225 0.048 0.042 0.049 -0.019 -0.013 -0.008
K3 0.040 0.050 0.041 -0.019 -0.006 -0.008
N300 0.079 0.071 0.072 -0.027 -0.017 0.015
C301 0.098 0.098 0.098 -0.039 -0.022 0.005
C302 0.116 0.116 0.116 -0.047 -0.027 0.006
O303 0.088 0.085 0.095 -0.033 -0.032 0.002
C304 0.092 0.092 0.092 -0.037 -0.021 0.005
C305 0.115 0.115 0.115 -0.046 -0.027 0.006
O306 0.075 0.082 0.076 -0.021 -0.020 0.003
C307 0.103 0.103 0.103 -0.041 -0.024 0.005
C308 0.111 0.111 0.111 -0.044 -0.025 0.006
N309 0.094 0.096 0.090 -0.037 -0.017 0.007
C310 0.100 0.100 0.100 -0.040 -0.023 0.005
C311 0.076 0.076 0.076 -0.031 -0.018 0.004
O312 0.074 0.077 0.069 -0.035 -0.025 0.002
C313 0.070 0.070 0.070 -0.028 -0.016 0.003
C314 0.053 0.053 0.053 -0.021 -0.012 0.003
O315 0.053 0.053 0.057 -0.019 -0.016 0.007
C316 0.083 0.083 0.083 -0.033 -0.019 0.004
C317 0.099 0.099 0.099 -0.040 -0.023 0.005
C318 0.111 0.111 0.111 -0.044 -0.026 0.006
C319 0.108 0.108 0.108 -0.043 -0.025 0.005
O320 0.059 0.062 0.062 -0.019 -0.003 0.009
C321 0.074 0.074 0.074 -0.030 -0.017 0.004
C322 0.078 0.078 0.078 -0.031 -0.018 0.004
O323 0.062 0.064 0.071 -0.033 -0.010 0.014
C324 0.087 0.087 0.087 -0.035 -0.020 0.004
C325 0.080 0.080 0.080 -0.032 -0.018 0.004
K4 0.052 0.027 0.045 -0.010 -0.009 -0.008
N400 0.072 0.068 0.073 -0.029 -0.012 0.002
C401 0.073 0.073 0.073 -0.029 -0.017 0.004
C402 0.090 0.090 0.090 -0.036 -0.021 0.004
O403 0.074 0.074 0.077 -0.028 -0.014 0.009
C404 0.081 0.081 0.081 -0.032 -0.019 0.004
C405 0.066 0.066 0.066 -0.026 -0.015 0.003
O406 0.082 0.076 0.080 -0.032 -0.031 0.000
C407 0.091 0.091 0.091 -0.036 -0.021 0.005
C408 0.118 0.118 0.118 -0.047 -0.027 0.006
N409 0.081 0.084 0.078 -0.029 -0.019 0.010
C410 0.076 0.076 0.076 -0.030 -0.017 0.004
C411 0.061 0.061 0.061 -0.024 -0.014 0.003
O412 0.068 0.067 0.077 -0.020 -0.015 0.001
C413 0.087 0.087 0.087 -0.035 -0.020 0.004
C414 0.058 0.058 0.058 -0.023 -0.013 0.003
O415 0.065 0.061 0.069 -0.026 -0.011 -0.002
C416 0.071 0.071 0.071 -0.028 -0.016 0.004
C417 0.074 0.074 0.074 -0.029 -0.017 0.004
C418 0.086 0.086 0.086 -0.034 -0.020 0.004
C419 0.079 0.079 0.079 -0.031 -0.018 0.004
O420 0.076 0.062 0.081 -0.029 -0.011 0.006
C421 0.052 0.052 0.052 -0.021 -0.012 0.003
C422 0.069 0.069 0.069 -0.027 -0.016 0.003
O423 0.064 0.055 0.067 -0.021 -0.023 0.000
C424 0.076 0.076 0.076 -0.030 -0.018 0.004
C425 0.086 0.086 0.086 -0.035 -0.020 0.004
K5 0.091 0.070 0.043 -0.027 0.007 -0.023
N500 0.068 0.066 0.068 -0.024 -0.009 -0.002
O503 0.062 0.064 0.067 -0.023 -0.013 0.003
O506 0.094 0.094 0.093 -0.041 -0.017 0.012
N509 0.131 0.128 0.126 -0.057 -0.026 0.012
O512 0.178 0.180 0.174 -0.070 -0.044 0.010
O515 0.124 0.119 0.109 -0.051 -0.024 0.001
O520 0.121 0.117 0.121 -0.053 -0.026 -0.002
O523 0.189 0.191 0.195 -0.070 -0.045 0.012
K6 0.083 0.108 0.069 -0.060 -0.027 0.034
K7 0.069 0.117 0.084 -0.081 -0.023 0.033
K8 0.137 0.122 0.125 -0.093 0.053 -0.063
 
_geom_special_details
;
  All esds (except the esd in the dihedral angle between two l.s. planes)
  are estimated using the full covariance matrix.  The cell esds are taken
  into account individually in the estimation of esds in distances, angles
  and torsion angles; correlations between esds in cell parameters are only
  used when they are defined by crystal symmetry.  An approximate (isotropic)
  treatment of cell esds is used for estimating esds involving l.s. planes.
;
 
loop_
  _geom_bond_atom_site_label_1
  _geom_bond_atom_site_label_2
  _geom_bond_distance
  _geom_bond_site_symmetry_2
  _geom_bond_publ_flag
Sn11 Sn15 2.935(3) . ?
Sn11 Sn13 2.946(3) . ?
Sn11 Sn12 2.955(5) . ?
Sn11 Sn14 2.978(3) . ?
Sn12 Sn16 2.979(3) . ?
Sn12 Sn17 2.984(3) . ?
Sn12 Sn15 3.167(4) . ?
Sn12 Sn13 3.209(4) . ?
Sn13 Sn17 2.968(4) . ?
Sn13 Sn18 2.977(3) . ?
Sn13 Sn14 3.192(3) . ?
Sn14 Sn19 2.963(3) . ?
Sn14 Sn18 2.990(3) . ?
Sn14 Sn15 3.225(3) . ?
Sn15 Sn19 2.969(3) . ?
Sn15 Sn16 2.981(4) . ?
Sn16 W110 2.952(2) . ?
Sn16 Sn17 3.095(3) . ?
Sn16 Sn19 3.115(3) . ?
Sn17 W110 2.947(2) . ?
Sn17 Sn18 3.049(3) . ?
Sn18 W110 3.029(2) . ?
Sn18 Sn19 3.094(3) . ?
Sn19 W110 2.997(2) . ?
W110 C12 1.87(2) . ?
W110 C11 1.88(3) . ?
W110 C13 1.95(2) . ?
C11 O11 1.22(3) . ?
C12 O12 1.26(3) . ?
C13 O13 1.12(3) . ?
Sn21 Sn25 2.937(3) . ?
Sn21 Sn22 2.954(4) . ?
Sn21 Sn23 2.966(3) . ?
Sn21 Sn24 2.977(3) . ?
Sn22 Sn26 2.985(3) . ?
Sn22 Sn27 3.000(3) . ?
Sn22 Sn25 3.161(3) . ?
Sn22 Sn23 3.201(3) . ?
Sn23 Sn27 2.970(3) . ?
Sn23 Sn28 2.978(3) . ?
Sn23 Sn24 3.189(3) . ?
Sn24 Sn29 2.972(3) . ?
Sn24 Sn28 3.001(3) . ?
Sn24 Sn25 3.213(3) . ?
Sn25 Sn26 2.962(3) . ?
Sn25 Sn29 2.977(3) . ?
Sn26 W210 2.951(2) . ?
Sn26 Sn29 3.080(3) . ?
Sn26 Sn27 3.094(3) . ?
Sn27 W210 2.955(2) . ?
Sn27 Sn28 3.035(3) . ?
Sn28 W210 3.020(2) . ?
Sn28 Sn29 3.099(3) . ?
Sn29 W210 2.999(2) . ?
W210 C23 1.87(2) . ?
W210 C22 1.94(2) . ?
W210 C21 1.98(3) . ?
C21 O21 1.09(3) . ?
C22 O22 1.17(3) . ?
C23 O23 1.24(3) . ?
K1 O123 2.80(2) . ?
K1 O112 2.82(2) . ?
K1 O103 2.86(2) . ?
K1 O120 2.87(2) . ?
K1 O115 2.86(2) . ?
K1 O106 2.93(2) . ?
K1 N100 2.96(2) . ?
K1 N109 2.97(2) . ?
N100 C101 1.44(4) . ?
N100 C117 1.42(4) . ?
N100 C118 1.48(3) . ?
C101 C102 1.44(5) . ?
C102 O103 1.44(4) . ?
O103 C104 1.40(3) . ?
C104 C105 1.43(4) . ?
C105 O106 1.43(3) . ?
O106 C107 1.40(3) . ?
C107 C108 1.54(4) . ?
C108 N109 1.51(4) . ?
N109 C125 1.46(4) . ?
N109 C110 1.49(4) . ?
C110 C111 1.43(4) . ?
C111 O112 1.43(3) . ?
O112 C113 1.48(3) . ?
C113 C114 1.58(4) . ?
C114 O115 1.27(4) . ?
O115 C116 1.42(4) . ?
C116 C117 1.49(4) . ?
C118 C119 1.57(4) . ?
C119 O120 1.33(3) . ?
O120 C121 1.44(3) . ?
C121 C122 1.45(4) . ?
C122 O123 1.43(3) . ?
O123 C124 1.39(3) . ?
C124 C125 1.58(4) . ?
K2 O220 2.76(2) . ?
K2 O206 2.77(2) . ?
K2 O223 2.81(2) . ?
K2 O203 2.82(2) . ?
K2 O215 2.91(2) . ?
K2 O212 2.93(2) . ?
K2 N200 3.02(2) . ?
K2 N209 3.05(2) . ?
N200 C201 1.37(3) . ?
N200 C217 1.44(3) . ?
N200 C218 1.54(3) . ?
C201 C202 1.54(3) . ?
C202 O203 1.41(3) . ?
O203 C204 1.43(3) . ?
C204 C205 1.52(4) . ?
C205 O206 1.52(3) . ?
O206 C207 1.49(3) . ?
C207 C208 1.50(4) . ?
C208 N209 1.48(3) . ?
N209 C225 1.48(3) . ?
N209 C210 1.52(3) . ?
C210 C211 1.49(4) . ?
C211 O212 1.40(3) . ?
O212 C213 1.38(3) . ?
C213 C214 1.58(4) . ?
C214 O215 1.43(3) . ?
O215 C216 1.43(3) . ?
C216 C217 1.55(4) . ?
C218 C219 1.44(4) . ?
C219 O220 1.43(3) . ?
O220 C221 1.42(3) . ?
C221 C222 1.57(3) . ?
C222 O223 1.55(3) . ?
O223 C224 1.40(3) . ?
C224 C225 1.43(3) . ?
K3 O312 2.80(2) . ?
K3 O303 2.81(3) . ?
K3 O315 2.86(2) . ?
K3 O320 2.90(2) . ?
K3 O306 2.90(2) . ?
K3 O323 2.90(2) . ?
K3 N300 2.90(3) . ?
K3 N309 2.99(3) . ?
N300 C318 1.57(5) . ?
N300 C317 1.55(5) . ?
N300 C301 1.52(5) . ?
C301 C302 1.22(5) . ?
C302 O303 1.49(5) . ?
O303 C304 1.39(4) . ?
C304 C305 1.47(6) . ?
C305 O306 1.37(5) . ?
O306 C307 1.48(5) . ?
C307 C308 1.53(6) . ?
C308 N309 1.47(5) . ?
N309 C310 1.55(5) . ?
N309 C325 1.53(5) . ?
C310 C311 1.62(5) . ?
C311 O312 1.34(4) . ?
O312 C313 1.44(4) . ?
C313 C314 1.44(4) . ?
C314 O315 1.49(3) . ?
O315 C316 1.43(4) . ?
C316 C317 1.42(5) . ?
C318 C319 1.56(6) . ?
C319 O320 1.49(5) . ?
O320 C321 1.48(4) . ?
C321 C322 1.43(5) . ?
C322 O323 1.46(4) . ?
O323 C324 1.46(4) . ?
C324 C325 1.47(5) . ?
K4 O412 2.78(2) . ?
K4 O420 2.78(2) . ?
K4 O415 2.83(2) . ?
K4 O406 2.85(2) . ?
K4 O423 2.84(2) . ?
K4 O403 2.91(2) . ?
K4 N409 2.94(3) . ?
K4 N400 3.10(3) . ?
K4 C413 3.53(4) . ?
N400 C418 1.36(4) . ?
N400 C417 1.43(4) . ?
N400 C401 1.55(4) . ?
C401 C402 1.44(5) . ?
C402 O403 1.47(4) . ?
O403 C404 1.38(4) . ?
C404 C405 1.56(4) . ?
C405 O406 1.38(4) . ?
O406 C407 1.21(4) . ?
C407 C408 1.62(6) . ?
C408 N409 1.51(5) . ?
N409 C410 1.44(4) . ?
N409 C425 1.44(5) . ?
C410 C411 1.62(4) . ?
C411 O412 1.33(4) . ?
O412 C413 1.33(4) . ?
C413 C414 1.60(4) . ?
C414 O415 1.49(3) . ?
O415 C416 1.46(4) . ?
C416 C417 1.56(4) . ?
C418 C419 1.54(5) . ?
C419 O420 1.41(4) . ?
O420 C421 1.52(3) . ?
C421 C422 1.50(4) . ?
C422 O423 1.36(4) . ?
O423 C424 1.44(4) . ?
C424 C425 1.65(5) . ?
K5 O515 2.83(3) . ?
K5 O512 2.71(5) . ?
K5 O520 2.84(5) . ?
K5 O503 2.77(2) . ?
K5 O523 2.85(5) . ?
K5 O506 2.84(3) . ?
K5 N500 3.07(3) . ?
K5 N509 3.07(4) . ?
K5 C521 3.00(9) . ?
K5 C513 3.34(8) . ?
N500 C501 1.41(4) . ?
N500 C517 1.49(5) . ?
N500 C518 1.54(6) . ?
C501 C502 1.55(4) . ?
C502 O503 1.46(4) . ?
O503 C504 1.44(4) . ?
C504 C505 1.56(5) . ?
C505 O506 1.39(5) . ?
O506 C507 1.48(6) . ?
C507 C508 1.63(7) . ?
C508 N509 1.12(6) . ?
N509 C510 1.64(6) . ?
N509 C525 1.67(6) . ?
C510 C511 1.56(7) . ?
C511 O512 1.24(7) . ?
O512 C513 1.31(8) . ?
C513 C514 1.32(10) . ?
C514 O515 1.57(8) . ?
O515 C516 1.25(5) . ?
C516 C517 1.48(6) . ?
C518 C519 1.64(7) . ?
C519 O520 1.37(5) . ?
O520 C521 0.50(10) . ?
C521 C522 1.17(8) . ?
C522 O523 2.00(7) . ?
O523 C524 1.40(7) . ?
C524 C525 1.55(7) . ?
K6 O603 2.74(3) . ?
K6 O623 2.79(2) . ?
K6 O606 2.83(4) . ?
K6 N609 2.84(2) . ?
K6 N600 2.92(2) . ?
K6 O615 2.99(3) . ?
K6 O612 3.10(3) . ?
K6 O620 3.08(2) . ?
K6 C613 2.75(6) . ?
K6 C621 3.31(3) . ?
K6 N630 3.30(7) . ?
K6 C602 3.47(6) . ?
N600 C625 1.44(3) . ?
N600 C610 1.41(7) . ?
N600 C601 1.73(7) . ?
C602 O603 1.44(6) . ?
O603 C604 1.42(6) . ?
C604 C605 1.39(7) . ?
C605 O606 1.39(6) . ?
O606 C607 1.47(6) . ?
C607 C608 1.47(7) . ?
C608 N609 2.20(6) . ?
N609 C617 1.16(3) . ?
N609 C618 1.39(3) . ?
C610 C611 1.28(8) . ?
C611 O612 1.58(7) . ?
O612 C613 1.37(6) . ?
C613 C614 1.23(6) . ?
C613 O615 1.65(6) . ?
C614 O615 1.43(6) . ?
O615 C616 1.37(4) . ?
C616 C617 1.17(4) . ?
C617 C618 2.05(4) . ?
C618 C619 1.78(4) . ?
C619 O620 1.58(3) . ?
O620 C621 1.92(3) . ?
C621 C622 1.63(4) . ?
C622 O623 1.30(3) . ?
C622 C624 1.71(4) . ?
O623 C624 1.19(3) . ?
C624 C625 1.23(4) . ?
K7 O706 2.68(2) . ?
K7 O720 2.82(4) . ?
K7 O723 2.80(2) . ?
K7 N709 2.91(5) . ?
K7 O715 2.93(2) . ?
K7 O703 2.96(2) . ?
K7 O712 3.07(2) . ?
K7 C704 3.17(3) . ?
K7 C711 3.10(3) . ?
K7 N732 3.35(2) . ?
K7 N700 3.21(5) . ?
K7 C722 3.55(3) . ?
N700 C701 1.55(5) . ?
N700 C717 1.61(5) . ?
N700 C718 1.42(5) . ?
C701 C702 1.14(3) . ?
C702 O703 1.27(3) . ?
O703 C704 1.34(3) . ?
C704 C705 1.14(4) . ?
C705 O706 1.46(3) . ?
O706 C707 1.49(3) . ?
C707 C708 1.37(4) . ?
C708 N709 1.48(5) . ?
N709 C725 1.42(5) . ?
N709 C710 1.60(5) . ?
C710 C711 1.49(4) . ?
C711 O712 1.95(3) . ?
O712 C713 1.31(3) . ?
C713 C714 1.13(4) . ?
C713 O715 1.92(3) . ?
C714 O715 1.28(3) . ?
O715 C716 1.58(3) . ?
C716 C717 1.42(3) . ?
C718 C719 1.43(4) . ?
O720 C721 1.73(5) . ?
O720 C719 1.73(5) . ?
C721 C722 1.13(4) . ?
C721 O723 1.78(3) . ?
C722 O723 1.24(3) . ?
O723 C724 1.53(3) . ?
C724 C725 1.39(4) . ?
K8 O5 2.83(2) . ?
K8 O89 2.64(2) . ?
K8 O40 2.81(2) . ?
K8 O3 2.81(2) . ?
K8 N11 2.95(3) . ?
K8 O4 2.91(2) . ?
K8 O97 3.05(2) . ?
K8 N10 3.11(3) . ?
K8 C68 3.33(3) . ?
K8 C900 3.73(3) . ?
K8 C7 3.48(3) . ?
K8 C8 3.30(3) . ?
N11 C1 1.37(3) . ?
N11 C6 1.56(3) . ?
N11 C67 1.36(4) . ?
C1 C2 1.63(4) . ?
C2 O3 1.34(3) . ?
O3 C3 1.46(3) . ?
C3 C4 1.58(4) . ?
C4 O4 1.46(3) . ?
O4 C9 1.53(3) . ?
C9 C10 1.92(4) . ?
C10 N10 1.37(3) . ?
C10 C5 1.67(4) . ?
C5 N10 1.61(3) . ?
C5 C567 1.73(4) . ?
N630 C631 1.25(9) . ?
C631 C632 1.55(10) . ?
C632 N633 1.52(8) . ?
C732 N732 1.29(3) . ?
C732 C731 1.46(8) . ?
C731 N733 1.40(8) . ?
O89 C90 1.22(3) . ?
O89 C68 1.55(3) . ?
O5 C8 1.32(3) . ?
O5 C7 1.44(3) . ?
C130 O40 1.16(3) . ?
C130 C8 1.91(4) . ?
O40 C567 1.45(3) . ?
C6 C7 1.84(4) . ?
C68 C56 1.11(4) 1_446 ?
C56 C68 1.11(4) 1_664 ?
C56 O97 1.43(3) 1_664 ?
C67 C900 1.36(3) . ?
N10 C65 1.38(3) . ?
C65 C90 1.84(4) . ?
O97 C900 1.43(3) . ?
O97 C56 1.43(3) 1_446 ?
 
loop_
  _geom_angle_atom_site_label_1
  _geom_angle_atom_site_label_2
  _geom_angle_atom_site_label_3
  _geom_angle
  _geom_angle_site_symmetry_1
  _geom_angle_site_symmetry_3
  _geom_angle_publ_flag
Sn15 Sn11 Sn13 99.69(10) . . ?
Sn15 Sn11 Sn12 65.04(10) . . ?
Sn13 Sn11 Sn12 65.88(10) . . ?
Sn15 Sn11 Sn14 66.09(8) . . ?
Sn13 Sn11 Sn14 65.20(8) . . ?
Sn12 Sn11 Sn14 100.15(10) . . ?
Sn11 Sn12 Sn16 110.62(11) . . ?
Sn11 Sn12 Sn17 109.31(11) . . ?
Sn16 Sn12 Sn17 62.54(7) . . ?
Sn11 Sn12 Sn15 57.17(9) . . ?
Sn16 Sn12 Sn15 57.94(8) . . ?
Sn17 Sn12 Sn15 100.69(8) . . ?
Sn11 Sn12 Sn13 56.91(9) . . ?
Sn16 Sn12 Sn13 101.80(8) . . ?
Sn17 Sn12 Sn13 57.14(8) . . ?
Sn15 Sn12 Sn13 89.66(10) . . ?
Sn11 Sn13 Sn17 110.02(10) . . ?
Sn11 Sn13 Sn18 110.86(9) . . ?
Sn17 Sn13 Sn18 61.70(7) . . ?
Sn11 Sn13 Sn14 57.90(8) . . ?
Sn17 Sn13 Sn14 101.04(8) . . ?
Sn18 Sn13 Sn14 57.86(7) . . ?
Sn11 Sn13 Sn12 57.20(10) . . ?
Sn17 Sn13 Sn12 57.62(8) . . ?
Sn18 Sn13 Sn12 101.49(8) . . ?
Sn14 Sn13 Sn12 90.62(8) . . ?
Sn19 Sn14 Sn11 109.02(11) . . ?
Sn19 Sn14 Sn18 62.63(7) . . ?
Sn11 Sn14 Sn18 109.60(11) . . ?
Sn19 Sn14 Sn13 100.94(9) . . ?
Sn11 Sn14 Sn13 56.91(8) . . ?
Sn18 Sn14 Sn13 57.47(7) . . ?
Sn19 Sn14 Sn15 57.17(7) . . ?
Sn11 Sn14 Sn15 56.31(8) . . ?
Sn18 Sn14 Sn15 100.76(9) . . ?
Sn13 Sn14 Sn15 88.94(9) . . ?
Sn11 Sn15 Sn19 110.02(9) . . ?
Sn11 Sn15 Sn16 111.11(10) . . ?
Sn19 Sn15 Sn16 63.12(7) . . ?
Sn11 Sn15 Sn12 57.79(10) . . ?
Sn19 Sn15 Sn12 101.70(8) . . ?
Sn16 Sn15 Sn12 57.86(8) . . ?
Sn11 Sn15 Sn14 57.60(8) . . ?
Sn19 Sn15 Sn14 56.97(7) . . ?
Sn16 Sn15 Sn14 102.15(8) . . ?
Sn12 Sn15 Sn14 90.78(8) . . ?
W110 Sn16 Sn15 114.39(9) . . ?
W110 Sn16 Sn12 114.38(8) . . ?
Sn15 Sn16 Sn12 64.20(9) . . ?
W110 Sn16 Sn17 58.27(6) . . ?
Sn15 Sn16 Sn17 102.44(9) . . ?
Sn12 Sn16 Sn17 58.82(7) . . ?
W110 Sn16 Sn19 59.13(5) . . ?
Sn15 Sn16 Sn19 58.26(7) . . ?
Sn12 Sn16 Sn19 102.72(10) . . ?
Sn17 Sn16 Sn19 88.23(8) . . ?
W110 Sn17 Sn13 116.40(9) . . ?
W110 Sn17 Sn12 114.37(8) . . ?
Sn13 Sn17 Sn12 65.24(9) . . ?
W110 Sn17 Sn18 60.65(6) . . ?
Sn13 Sn17 Sn18 59.30(8) . . ?
Sn12 Sn17 Sn18 105.19(10) . . ?
W110 Sn17 Sn16 58.44(6) . . ?
Sn13 Sn17 Sn16 104.78(9) . . ?
Sn12 Sn17 Sn16 58.64(7) . . ?
Sn18 Sn17 Sn16 91.77(8) . . ?
Sn13 Sn18 Sn14 64.66(8) . . ?
Sn13 Sn18 W110 113.65(9) . . ?
Sn14 Sn18 W110 113.76(8) . . ?
Sn13 Sn18 Sn17 59.00(8) . . ?
Sn14 Sn18 Sn17 103.93(9) . . ?
W110 Sn18 Sn17 58.01(6) . . ?
Sn13 Sn18 Sn19 102.91(8) . . ?
Sn14 Sn18 Sn19 58.25(7) . . ?
W110 Sn18 Sn19 58.60(6) . . ?
Sn17 Sn18 Sn19 89.44(8) . . ?
Sn14 Sn19 Sn15 65.86(8) . . ?
Sn14 Sn19 W110 115.52(8) . . ?
Sn15 Sn19 W110 113.42(9) . . ?
Sn14 Sn19 Sn18 59.12(7) . . ?
Sn15 Sn19 Sn18 104.34(7) . . ?
W110 Sn19 Sn18 59.61(6) . . ?
Sn14 Sn19 Sn16 105.25(8) . . ?
Sn15 Sn19 Sn16 58.62(8) . . ?
W110 Sn19 Sn16 57.74(6) . . ?
Sn18 Sn19 Sn16 90.54(7) . . ?
C12 W110 C11 89.3(11) . . ?
C12 W110 C13 87.1(10) . . ?
C11 W110 C13 86.5(11) . . ?
C12 W110 Sn17 138.8(7) . . ?
C11 W110 Sn17 81.0(9) . . ?
C13 W110 Sn17 131.6(7) . . ?
C12 W110 Sn16 148.9(7) . . ?
C11 W110 Sn16 119.7(8) . . ?
C13 W110 Sn16 84.0(7) . . ?
Sn17 W110 Sn16 63.29(6) . . ?
C12 W110 Sn19 90.2(7) . . ?
C11 W110 Sn19 170.6(9) . . ?
C13 W110 Sn19 102.8(6) . . ?
Sn17 W110 Sn19 93.31(7) . . ?
Sn16 W110 Sn19 63.14(7) . . ?
C12 W110 Sn18 84.8(7) . . ?
C11 W110 Sn18 108.8(9) . . ?
C13 W110 Sn18 162.5(7) . . ?
Sn17 W110 Sn18 61.34(7) . . ?
Sn16 W110 Sn18 95.03(7) . . ?
Sn19 W110 Sn18 61.79(6) . . ?
O11 C11 W110 173.7(24) . . ?
O12 C12 W110 178.8(20) . . ?
O13 C13 W110 177.6(21) . . ?
Sn25 Sn21 Sn22 64.89(9) . . ?
Sn25 Sn21 Sn23 99.20(9) . . ?
Sn22 Sn21 Sn23 65.46(8) . . ?
Sn25 Sn21 Sn24 65.81(8) . . ?
Sn22 Sn21 Sn24 99.58(9) . . ?
Sn23 Sn21 Sn24 64.90(8) . . ?
Sn21 Sn22 Sn26 110.31(10) . . ?
Sn21 Sn22 Sn27 109.82(10) . . ?
Sn26 Sn22 Sn27 62.27(7) . . ?
Sn21 Sn22 Sn25 57.30(8) . . ?
Sn26 Sn22 Sn25 57.55(7) . . ?
Sn27 Sn22 Sn25 100.75(8) . . ?
Sn21 Sn22 Sn23 57.45(8) . . ?
Sn26 Sn22 Sn23 101.28(8) . . ?
Sn27 Sn22 Sn23 57.12(7) . . ?
Sn25 Sn22 Sn23 89.92(8) . . ?
Sn21 Sn23 Sn27 110.33(9) . . ?
Sn21 Sn23 Sn28 110.97(9) . . ?
Sn27 Sn23 Sn28 61.36(7) . . ?
Sn21 Sn23 Sn24 57.72(8) . . ?
Sn27 Sn23 Sn24 101.01(8) . . ?
Sn28 Sn23 Sn24 58.11(7) . . ?
Sn21 Sn23 Sn22 57.09(8) . . ?
Sn27 Sn23 Sn22 58.03(7) . . ?
Sn28 Sn23 Sn22 101.43(8) . . ?
Sn24 Sn23 Sn22 90.29(8) . . ?
Sn29 Sn24 Sn21 109.55(10) . . ?
Sn29 Sn24 Sn28 62.51(7) . . ?
Sn21 Sn24 Sn28 110.04(9) . . ?
Sn29 Sn24 Sn23 101.11(8) . . ?
Sn21 Sn24 Sn23 57.38(7) . . ?
Sn28 Sn24 Sn23 57.43(7) . . ?
Sn29 Sn24 Sn25 57.39(6) . . ?
Sn21 Sn24 Sn25 56.50(8) . . ?
Sn28 Sn24 Sn25 100.79(8) . . ?
Sn23 Sn24 Sn25 89.21(8) . . ?
Sn21 Sn25 Sn26 111.41(9) . . ?
Sn21 Sn25 Sn29 110.52(9) . . ?
Sn26 Sn25 Sn29 62.48(6) . . ?
Sn21 Sn25 Sn22 57.82(9) . . ?
Sn26 Sn25 Sn22 58.24(7) . . ?
Sn29 Sn25 Sn22 101.80(7) . . ?
Sn21 Sn25 Sn24 57.69(7) . . ?
Sn26 Sn25 Sn24 101.67(7) . . ?
Sn29 Sn25 Sn24 57.24(6) . . ?
Sn22 Sn25 Sn24 90.58(8) . . ?
W210 Sn26 Sn25 115.54(8) . . ?
W210 Sn26 Sn22 114.95(8) . . ?
Sn25 Sn26 Sn22 64.21(8) . . ?
W210 Sn26 Sn29 59.59(5) . . ?
Sn25 Sn26 Sn29 59.00(7) . . ?
Sn22 Sn26 Sn29 103.54(9) . . ?
W210 Sn26 Sn27 58.47(6) . . ?
Sn25 Sn26 Sn27 103.16(8) . . ?
Sn22 Sn26 Sn27 59.10(7) . . ?
Sn29 Sn26 Sn27 89.03(7) . . ?
W210 Sn27 Sn23 116.46(8) . . ?
W210 Sn27 Sn22 114.38(8) . . ?
Sn23 Sn27 Sn22 64.85(8) . . ?
W210 Sn27 Sn28 60.54(6) . . ?
Sn23 Sn27 Sn28 59.46(7) . . ?
Sn22 Sn27 Sn28 104.91(8) . . ?
W210 Sn27 Sn26 58.34(6) . . ?
Sn23 Sn27 Sn26 104.16(8) . . ?
Sn22 Sn27 Sn26 58.62(7) . . ?
Sn28 Sn27 Sn26 91.07(7) . . ?
Sn23 Sn28 Sn24 64.46(8) . . ?
Sn23 Sn28 W210 114.21(8) . . ?
Sn24 Sn28 W210 113.90(7) . . ?
Sn23 Sn28 Sn27 59.18(7) . . ?
Sn24 Sn28 Sn27 103.94(8) . . ?
W210 Sn28 Sn27 58.42(6) . . ?
Sn23 Sn28 Sn29 103.09(8) . . ?
Sn24 Sn28 Sn29 58.30(6) . . ?
W210 Sn28 Sn29 58.68(5) . . ?
Sn27 Sn28 Sn29 89.77(7) . . ?
Sn24 Sn29 Sn25 65.37(7) . . ?
Sn24 Sn29 W210 115.37(7) . . ?
Sn25 Sn29 W210 113.65(7) . . ?
Sn24 Sn29 Sn26 104.62(8) . . ?
Sn25 Sn29 Sn26 58.52(6) . . ?
W210 Sn29 Sn26 58.06(5) . . ?
Sn24 Sn29 Sn28 59.19(6) . . ?
Sn25 Sn29 Sn28 104.02(7) . . ?
W210 Sn29 Sn28 59.35(6) . . ?
Sn26 Sn29 Sn28 90.13(7) . . ?
C23 W210 C22 92.7(9) . . ?
C23 W210 C21 84.9(10) . . ?
C22 W210 C21 85.8(10) . . ?
C23 W210 Sn26 119.0(7) . . ?
C22 W210 Sn26 146.4(6) . . ?
C21 W210 Sn26 86.3(8) . . ?
C23 W210 Sn27 79.0(7) . . ?
C22 W210 Sn27 140.3(6) . . ?
C21 W210 Sn27 131.1(8) . . ?
Sn26 W210 Sn27 63.19(6) . . ?
C23 W210 Sn29 169.4(7) . . ?
C22 W210 Sn29 88.6(6) . . ?
C21 W210 Sn29 105.7(7) . . ?
Sn26 W210 Sn29 62.35(6) . . ?
Sn27 W210 Sn29 93.28(7) . . ?
C23 W210 Sn28 107.6(7) . . ?
C22 W210 Sn28 85.6(6) . . ?
C21 W210 Sn28 165.1(7) . . ?
Sn26 W210 Sn28 94.20(6) . . ?
Sn27 W210 Sn28 61.04(6) . . ?
Sn29 W210 Sn28 61.98(6) . . ?
O21 C21 W210 179.3(25) . . ?
O22 C22 W210 177.0(19) . . ?
O23 C23 W210 179.3(20) . . ?
O123 K1 O112 95.6(6) . . ?
O123 K1 O103 120.2(6) . . ?
O112 K1 O103 137.3(5) . . ?
O123 K1 O120 61.1(5) . . ?
O112 K1 O120 118.7(5) . . ?
O103 K1 O120 99.8(5) . . ?
O123 K1 O115 135.7(6) . . ?
O112 K1 O115 60.6(6) . . ?
O103 K1 O115 99.8(6) . . ?
O120 K1 O115 96.3(5) . . ?
O123 K1 O106 99.5(6) . . ?
O112 K1 O106 95.9(5) . . ?
O103 K1 O106 58.3(5) . . ?
O120 K1 O106 140.5(5) . . ?
O115 K1 O106 118.3(6) . . ?
O123 K1 N100 120.7(6) . . ?
O112 K1 N100 120.6(7) . . ?
O103 K1 N100 62.1(6) . . ?
O120 K1 N100 60.5(6) . . ?
O115 K1 N100 60.8(7) . . ?
O106 K1 N100 119.0(6) . . ?
O123 K1 N109 60.8(6) . . ?
O112 K1 N109 59.1(6) . . ?
O103 K1 N109 116.9(6) . . ?
O120 K1 N109 121.1(6) . . ?
O115 K1 N109 118.7(6) . . ?
O106 K1 N109 59.7(6) . . ?
N100 K1 N109 178.4(7) . . ?
C101 N100 C117 110.8(27) . . ?
C101 N100 C118 110.6(25) . . ?
C117 N100 C118 109.7(24) . . ?
C101 N100 K1 105.9(19) . . ?
C117 N100 K1 108.8(17) . . ?
C118 N100 K1 111.1(16) . . ?
N100 C101 C102 118.0(30) . . ?
O103 C102 C101 109.0(27) . . ?
C104 O103 C102 108.6(20) . . ?
C104 O103 K1 116.8(13) . . ?
C102 O103 K1 111.6(16) . . ?
O103 C104 C105 110.6(21) . . ?
O106 C105 C104 112.9(22) . . ?
C107 O106 C105 115.3(21) . . ?
C107 O106 K1 116.1(16) . . ?
C105 O106 K1 114.2(14) . . ?
O106 C107 C108 112.7(24) . . ?
N109 C108 C107 110.2(22) . . ?
C125 N109 C110 108.2(23) . . ?
C125 N109 C108 104.1(22) . . ?
C110 N109 C108 106.2(21) . . ?
C125 N109 K1 112.3(15) . . ?
C110 N109 K1 110.9(17) . . ?
C108 N109 K1 114.6(15) . . ?
C111 C110 N109 113.2(27) . . ?
O112 C111 C110 109.2(24) . . ?
C111 O112 C113 112.5(19) . . ?
C111 O112 K1 119.2(16) . . ?
C113 O112 K1 116.1(14) . . ?
O112 C113 C114 108.9(21) . . ?
O115 C114 C113 113.7(29) . . ?
C114 O115 C116 110.2(26) . . ?
C114 O115 K1 115.8(21) . . ?
C116 O115 K1 114.3(17) . . ?
O115 C116 C117 108.8(27) . . ?
N100 C117 C116 115.6(28) . . ?
N100 C118 C119 113.2(23) . . ?
O120 C119 C118 110.1(22) . . ?
C119 O120 C121 111.9(20) . . ?
C119 O120 K1 116.7(16) . . ?
C121 O120 K1 112.3(13) . . ?
C122 C121 O120 110.1(23) . . ?
C121 C122 O123 112.7(24) . . ?
C124 O123 C122 114.3(22) . . ?
C124 O123 K1 119.8(17) . . ?
C122 O123 K1 112.5(16) . . ?
O123 C124 C125 113.2(25) . . ?
N109 C125 C124 110.8(25) . . ?
O220 K2 O206 133.5(5) . . ?
O220 K2 O223 63.3(5) . . ?
O206 K2 O223 90.7(5) . . ?
O220 K2 O203 92.2(5) . . ?
O206 K2 O203 62.1(5) . . ?
O223 K2 O203 113.3(5) . . ?
O220 K2 O215 101.3(5) . . ?
O206 K2 O215 119.9(5) . . ?
O223 K2 O215 143.0(5) . . ?
O203 K2 O215 100.0(5) . . ?
O220 K2 O212 124.4(5) . . ?
O206 K2 O212 96.4(5) . . ?
O223 K2 O212 100.3(5) . . ?
O203 K2 O212 139.1(5) . . ?
O215 K2 O212 59.0(5) . . ?
O220 K2 N200 61.2(5) . . ?
O206 K2 N200 120.9(6) . . ?
O223 K2 N200 123.5(5) . . ?
O203 K2 N200 60.4(5) . . ?
O215 K2 N200 60.3(5) . . ?
O212 K2 N200 118.6(5) . . ?
O220 K2 N209 120.8(5) . . ?
O206 K2 N209 59.0(5) . . ?
O223 K2 N209 58.7(5) . . ?
O203 K2 N209 120.1(5) . . ?
O215 K2 N209 117.5(5) . . ?
O212 K2 N209 59.4(5) . . ?
N200 K2 N209 177.6(6) . . ?
C201 N200 C217 112.6(20) . . ?
C201 N200 C218 110.5(19) . . ?
C217 N200 C218 109.7(20) . . ?
C201 N200 K2 107.8(15) . . ?
C217 N200 K2 109.9(15) . . ?
C218 N200 K2 106.1(14) . . ?
N200 C201 C202 116.4(19) . . ?
O203 C202 C201 106.7(20) . . ?
C202 O203 C204 109.5(18) . . ?
C202 O203 K2 116.0(15) . . ?
C204 O203 K2 112.1(12) . . ?
O203 C204 C205 109.4(20) . . ?
O206 C205 C204 103.9(20) . . ?
C207 O206 C205 106.7(19) . . ?
C207 O206 K2 121.4(14) . . ?
C205 O206 K2 112.3(15) . . ?
O206 C207 C208 106.8(20) . . ?
N209 C208 C207 111.4(20) . . ?
C208 N209 C225 110.3(19) . . ?
C208 N209 C210 111.5(20) . . ?
C225 N209 C210 108.8(20) . . ?
C208 N209 K2 110.2(14) . . ?
C225 N209 K2 106.8(13) . . ?
C210 N209 K2 109.1(14) . . ?
N209 C210 C211 111.9(21) . . ?
O212 C211 C210 111.6(21) . . ?
C211 O212 C213 113.4(20) . . ?
C211 O212 K2 117.7(14) . . ?
C213 O212 K2 115.5(15) . . ?
O212 C213 C214 113.6(23) . . ?
O215 C214 C213 107.5(24) . . ?
C216 O215 C214 109.6(21) . . ?
C216 O215 K2 113.0(15) . . ?
C214 O215 K2 118.4(15) . . ?
O215 C216 C217 107.9(24) . . ?
N200 C217 C216 112.5(23) . . ?
C219 C218 N200 114.4(22) . . ?
O220 C219 C218 112.5(23) . . ?
C219 O220 C221 110.4(19) . . ?
C219 O220 K2 121.4(15) . . ?
C221 O220 K2 116.5(13) . . ?
O220 C221 C222 108.3(19) . . ?
O223 C222 C221 109.4(18) . . ?
C224 O223 C222 109.2(17) . . ?
C224 O223 K2 117.0(13) . . ?
C222 O223 K2 112.0(12) . . ?
O223 C224 C225 105.9(20) . . ?
C224 C225 N209 114.9(21) . . ?
O312 K3 O303 135.6(7) . . ?
O312 K3 O315 60.8(6) . . ?
O303 K3 O315 97.6(7) . . ?
O312 K3 O320 121.3(7) . . ?
O303 K3 O320 99.8(7) . . ?
O315 K3 O320 101.2(6) . . ?
O312 K3 O306 93.4(7) . . ?
O303 K3 O306 60.0(8) . . ?
O315 K3 O306 116.3(6) . . ?
O320 K3 O306 138.6(6) . . ?
O312 K3 O323 101.7(7) . . ?
O303 K3 O323 114.3(7) . . ?
O315 K3 O323 144.3(6) . . ?
O320 K3 O323 59.2(6) . . ?
O306 K3 O323 94.4(6) . . ?
O312 K3 N300 120.6(7) . . ?
O303 K3 N300 62.0(8) . . ?
O315 K3 N300 60.6(7) . . ?
O320 K3 N300 62.8(7) . . ?
O306 K3 N300 120.7(8) . . ?
O323 K3 N300 120.1(7) . . ?
O312 K3 N309 61.3(8) . . ?
O303 K3 N309 116.5(9) . . ?
O315 K3 N309 121.1(8) . . ?
O320 K3 N309 116.8(8) . . ?
O306 K3 N309 58.1(8) . . ?
O323 K3 N309 59.1(8) . . ?
N300 K3 N309 178.1(9) . . ?
C318 N300 C317 103.3(29) . . ?
C318 N300 C301 118.9(30) . . ?
C317 N300 C301 111.1(30) . . ?
C318 N300 K3 104.6(22) . . ?
C317 N300 K3 110.6(21) . . ?
C301 N300 K3 108.1(21) . . ?
C302 C301 N300 114.1(39) . . ?
C301 C302 O303 117.4(41) . . ?
C304 O303 C302 120.0(31) . . ?
C304 O303 K3 110.2(22) . . ?
C302 O303 K3 109.3(24) . . ?
O303 C304 C305 116.1(34) . . ?
O306 C305 C304 107.2(36) . . ?
C305 O306 C307 109.9(32) . . ?
C305 O306 K3 114.3(25) . . ?
C307 O306 K3 113.5(23) . . ?
O306 C307 C308 108.6(37) . . ?
N309 C308 C307 104.3(37) . . ?
C308 N309 C310 104.6(33) . . ?
C308 N309 C325 107.9(32) . . ?
C310 N309 C325 110.1(32) . . ?
C308 N309 K3 116.2(27) . . ?
C310 N309 K3 109.1(23) . . ?
C325 N309 K3 108.8(21) . . ?
N309 C310 C311 111.0(35) . . ?
O312 C311 C310 110.6(31) . . ?
C311 O312 C313 111.7(24) . . ?
C311 O312 K3 123.1(20) . . ?
C313 O312 K3 115.1(18) . . ?
C314 C313 O312 115.0(27) . . ?
C313 C314 O315 108.4(24) . . ?
C316 O315 C314 109.5(22) . . ?
C316 O315 K3 113.6(19) . . ?
C314 O315 K3 113.6(14) . . ?
O315 C316 C317 108.0(31) . . ?
C316 C317 N300 113.3(34) . . ?
N300 C318 C319 108.9(34) . . ?
O320 C319 C318 99.1(32) . . ?
C319 O320 C321 106.0(26) . . ?
C319 O320 K3 112.3(21) . . ?
C321 O320 K3 115.9(17) . . ?
C322 C321 O320 109.7(27) . . ?
C321 C322 O323 115.7(28) . . ?
C322 O323 C324 109.7(25) . . ?
C322 O323 K3 116.0(17) . . ?
C324 O323 K3 117.8(20) . . ?
O323 C324 C325 102.1(30) . . ?
C324 C325 N309 115.3(31) . . ?
O412 K4 O420 132.8(7) . . ?
O412 K4 O415 62.9(7) . . ?
O420 K4 O415 90.5(7) . . ?
O412 K4 O406 99.9(7) . . ?
O420 K4 O406 122.1(7) . . ?
O415 K4 O406 141.6(7) . . ?
O412 K4 O423 90.6(6) . . ?
O420 K4 O423 63.2(6) . . ?
O415 K4 O423 112.7(6) . . ?
O406 K4 O423 100.9(7) . . ?
O412 K4 O403 125.0(7) . . ?
O420 K4 O403 96.7(7) . . ?
O415 K4 O403 101.5(7) . . ?
O406 K4 O403 58.6(7) . . ?
O423 K4 O403 139.6(6) . . ?
O412 K4 N409 60.9(8) . . ?
O420 K4 N409 121.4(8) . . ?
O415 K4 N409 122.9(7) . . ?
O406 K4 N409 59.7(7) . . ?
O423 K4 N409 59.8(7) . . ?
O403 K4 N409 117.8(8) . . ?
O412 K4 N400 120.3(7) . . ?
O420 K4 N400 59.0(7) . . ?
O415 K4 N400 58.5(7) . . ?
O406 K4 N400 118.6(7) . . ?
O423 K4 N400 121.0(7) . . ?
O403 K4 N400 60.5(7) . . ?
N409 K4 N400 178.2(8) . . ?
O412 K4 C413 20.2(8) . . ?
O420 K4 C413 116.5(8) . . ?
O415 K4 C413 44.6(8) . . ?
O406 K4 C413 119.4(8) . . ?
O423 K4 C413 91.7(8) . . ?
O403 K4 C413 128.5(8) . . ?
N409 K4 C413 78.3(9) . . ?
N400 K4 C413 103.1(8) . . ?
C418 N400 C417 108.7(29) . . ?
C418 N400 C401 109.8(27) . . ?
C417 N400 C401 112.3(26) . . ?
C418 N400 K4 108.5(22) . . ?
C417 N400 K4 109.4(20) . . ?
C401 N400 K4 108.0(19) . . ?
C402 C401 N400 111.0(29) . . ?
O403 C402 C401 113.1(30) . . ?
C404 O403 C402 107.9(26) . . ?
C404 O403 K4 118.0(20) . . ?
C402 O403 K4 113.7(20) . . ?
O403 C404 C405 101.9(28) . . ?
O406 C405 C404 117.6(28) . . ?
C407 O406 C405 117.3(28) . . ?
C407 O406 K4 112.8(23) . . ?
C405 O406 K4 115.0(18) . . ?
O406 C407 C408 119.5(37) . . ?
N409 C408 C407 102.1(33) . . ?
C410 N409 C408 99.7(31) . . ?
C410 N409 C425 105.5(29) . . ?
C408 N409 C425 110.1(29) . . ?
C410 N409 K4 109.6(21) . . ?
C408 N409 K4 116.5(24) . . ?
C425 N409 K4 114.0(22) . . ?
N409 C410 C411 112.3(29) . . ?
O412 C411 C410 109.2(24) . . ?
C413 O412 C411 108.8(26) . . ?
C413 O412 K4 113.9(22) . . ?
C411 O412 K4 122.5(18) . . ?
O412 C413 C414 110.1(30) . . ?
O412 C413 K4 46.0(17) . . ?
C414 C413 K4 81.1(19) . . ?
O415 C414 C413 107.7(25) . . ?
C414 O415 C416 107.2(22) . . ?
C414 O415 K4 111.0(16) . . ?
C416 O415 K4 117.6(16) . . ?
O415 C416 C417 103.2(25) . . ?
N400 C417 C416 114.2(29) . . ?
N400 C418 C419 115.7(31) . . ?
O420 C419 C418 109.0(29) . . ?
C419 O420 C421 111.7(24) . . ?
C419 O420 K4 120.6(20) . . ?
C421 O420 K4 109.0(17) . . ?
O420 C421 C422 111.5(25) . . ?
O423 C422 C421 110.4(26) . . ?
C422 O423 C424 104.9(24) . . ?
C422 O423 K4 112.8(17) . . ?
C424 O423 K4 114.9(18) . . ?
O423 C424 C425 102.2(27) . . ?
N409 C425 C424 108.0(29) . . ?
O515 K5 O512 63.0(13) . . ?
O515 K5 O520 93.4(10) . . ?
O512 K5 O520 122.0(12) . . ?
O515 K5 O503 97.0(8) . . ?
O512 K5 O503 132.5(11) . . ?
O520 K5 O503 100.6(9) . . ?
O515 K5 O523 140.7(13) . . ?
O512 K5 O523 101.5(16) . . ?
O520 K5 O523 63.0(13) . . ?
O503 K5 O523 117.2(12) . . ?
O515 K5 O506 121.6(9) . . ?
O512 K5 O506 91.9(12) . . ?
O520 K5 O506 140.7(10) . . ?
O503 K5 O506 61.0(7) . . ?
O523 K5 O506 93.3(13) . . ?
O515 K5 N500 58.7(8) . . ?
O512 K5 N500 121.6(13) . . ?
O520 K5 N500 59.9(9) . . ?
O503 K5 N500 61.0(7) . . ?
O523 K5 N500 120.5(12) . . ?
O506 K5 N500 121.3(8) . . ?
O515 K5 N509 122.7(11) . . ?
O512 K5 N509 60.4(14) . . ?
O520 K5 N509 123.3(11) . . ?
O503 K5 N509 114.6(10) . . ?
O523 K5 N509 61.7(14) . . ?
O506 K5 N509 54.1(10) . . ?
N500 K5 N509 175.5(11) . . ?
O515 K5 C521 98.6(19) . . ?
O512 K5 C521 117.5(20) . . ?
O520 K5 C521 9.3(18) . . ?
O503 K5 C521 107.5(17) . . ?
O523 K5 C521 54.5(17) . . ?
O506 K5 C521 138.5(20) . . ?
N500 K5 C521 69.1(15) . . ?
N509 K5 C521 114.1(16) . . ?
O515 K5 C513 41.5(16) . . ?
O512 K5 C513 22.0(16) . . ?
O520 K5 C513 117.9(16) . . ?
O503 K5 C513 120.3(14) . . ?
O523 K5 C513 120.5(18) . . ?
O506 K5 C513 100.9(15) . . ?
N500 K5 C513 100.1(16) . . ?
N509 K5 C513 81.3(17) . . ?
C521 K5 C513 117.3(22) . . ?
C501 N500 C517 109.9(31) . . ?
C501 N500 C518 117.0(28) . . ?
C517 N500 C518 110.7(32) . . ?
C501 N500 K5 107.5(20) . . ?
C517 N500 K5 109.9(24) . . ?
C518 N500 K5 101.5(24) . . ?
N500 C501 C502 115.0(26) . . ?
O503 C502 C501 108.5(25) . . ?
C504 O503 C502 106.0(24) . . ?
C504 O503 K5 117.0(19) . . ?
C502 O503 K5 117.8(17) . . ?
O503 C504 C505 102.8(31) . . ?
O506 C505 C504 112.9(33) . . ?
C505 O506 C507 106.8(35) . . ?
C505 O506 K5 111.4(21) . . ?
C507 O506 K5 120.0(29) . . ?
O506 C507 C508 102.4(40) . . ?
N509 C508 C507 115.3(46) . . ?
C508 N509 C510 119.5(45) . . ?
C508 N509 C525 103.5(45) . . ?
C510 N509 C525 101.2(38) . . ?
C508 N509 K5 122.5(36) . . ?
C510 N509 K5 101.3(28) . . ?
C525 N509 K5 106.3(28) . . ?
C511 C510 N509 107.8(43) . . ?
C510 C511 O512 111.3(52) . . ?
C513 O512 C511 119.1(57) . . ?
C513 O512 K5 107.3(41) . . ?
C511 O512 K5 127.7(39) . . ?
C514 C513 O512 140.6(81) . . ?
C514 C513 K5 98.6(60) . . ?
O512 C513 K5 50.7(33) . . ?
C513 C514 O515 100.7(68) . . ?
C514 O515 C516 120.7(43) . . ?
C514 O515 K5 114.7(33) . . ?
C516 O515 K5 118.1(29) . . ?
C517 C516 O515 120.7(43) . . ?
N500 C517 C516 108.9(41) . . ?
N500 C518 C519 114.0(40) . . ?
O520 C519 C518 93.5(39) . . ?
C521 O520 C519 128.9(100) . . ?
C521 O520 K5 103.6(100) . . ?
C519 O520 K5 118.8(28) . . ?
O520 C521 C522 141.8(100) . . ?
O520 C521 K5 67.0(100) . . ?
C522 C521 K5 101.9(59) . . ?
C521 C522 O523 112.6(61) . . ?
C524 O523 C522 133.2(47) . . ?
C524 O523 K5 120.2(36) . . ?
C522 O523 K5 88.2(31) . . ?
O523 C524 C525 106.8(48) . . ?
C524 C525 N509 115.8(44) . . ?
O603 K6 O623 96.2(7) . . ?
O603 K6 O606 59.3(9) . . ?
O623 K6 O606 117.9(8) . . ?
O603 K6 N609 120.2(7) . . ?
O623 K6 N609 133.2(6) . . ?
O606 K6 N609 67.4(8) . . ?
O603 K6 N600 60.5(7) . . ?
O623 K6 N600 55.2(6) . . ?
O606 K6 N600 117.7(9) . . ?
N609 K6 N600 168.4(7) . . ?
O603 K6 O615 109.5(9) . . ?
O623 K6 O615 143.4(8) . . ?
O606 K6 O615 97.8(10) . . ?
N609 K6 O615 52.4(8) . . ?
N600 K6 O615 116.0(8) . . ?
O603 K6 O612 90.9(8) . . ?
O623 K6 O612 95.8(7) . . ?
O606 K6 O612 135.5(10) . . ?
N609 K6 O612 110.7(8) . . ?
N600 K6 O612 58.1(7) . . ?
O615 K6 O612 59.2(9) . . ?
O603 K6 O620 121.1(7) . . ?
O623 K6 O620 64.9(5) . . ?
O606 K6 O620 80.6(8) . . ?
N609 K6 O620 71.1(6) . . ?
N600 K6 O620 119.2(6) . . ?
O615 K6 O620 117.8(7) . . ?
O612 K6 O620 142.9(7) . . ?
O603 K6 C613 100.8(13) . . ?
O623 K6 C613 118.4(12) . . ?
O606 K6 C613 121.7(13) . . ?
N609 K6 C613 84.7(13) . . ?
N600 K6 C613 83.8(12) . . ?
O615 K6 C613 32.9(12) . . ?
O612 K6 C613 26.3(11) . . ?
O620 K6 C613 137.8(12) . . ?
O603 K6 C621 96.4(7) . . ?
O623 K6 C621 37.9(6) . . ?
O606 K6 C621 85.4(9) . . ?
N609 K6 C621 104.7(7) . . ?
N600 K6 C621 86.4(7) . . ?
O615 K6 C621 151.7(8) . . ?
O612 K6 C621 133.6(8) . . ?
O620 K6 C621 34.7(6) . . ?
C613 K6 C621 152.7(12) . . ?
O603 K6 N630 152.7(12) . . ?
O623 K6 N630 62.9(11) . . ?
O606 K6 N630 144.7(13) . . ?
N609 K6 N630 86.9(12) . . ?
N600 K6 N630 92.3(12) . . ?
O615 K6 N630 83.7(13) . . ?
O612 K6 N630 75.1(12) . . ?
O620 K6 N630 68.0(11) . . ?
C613 K6 N630 77.0(16) . . ?
C621 K6 N630 78.0(12) . . ?
O603 K6 C602 23.3(10) . . ?
O623 K6 C602 74.1(10) . . ?
O606 K6 C602 77.5(12) . . ?
N609 K6 C602 142.8(10) . . ?
N600 K6 C602 40.2(10) . . ?
O615 K6 C602 124.6(11) . . ?
O612 K6 C602 85.7(11) . . ?
O620 K6 C602 115.8(10) . . ?
C613 K6 C602 104.5(15) . . ?
C621 K6 C602 83.6(10) . . ?
N630 K6 C602 130.1(14) . . ?
C625 N600 C610 87.5(37) . . ?
C625 N600 C601 148.5(28) . . ?
C610 N600 C601 102.7(40) . . ?
C625 N600 K6 109.6(16) . . ?
C610 N600 K6 107.5(33) . . ?
C601 N600 K6 95.9(23) . . ?
O603 C602 K6 48.5(21) . . ?
C604 O603 C602 112.1(38) . . ?
C604 O603 K6 111.3(30) . . ?
C602 O603 K6 108.2(27) . . ?
O603 C604 C605 113.7(48) . . ?
O603 C604 K6 46.6(23) . . ?
C605 C604 K6 82.9(35) . . ?
O606 C605 C604 103.1(48) . . ?
C605 O606 C607 106.0(44) . . ?
C605 O606 K6 113.2(32) . . ?
C607 O606 K6 110.8(30) . . ?
C608 C607 O606 99.9(53) . . ?
C607 C608 N609 88.5(46) . . ?
C617 N609 C618 106.4(23) . . ?
C617 N609 C608 125.3(26) . . ?
C618 N609 C608 85.8(24) . . ?
C617 N609 K6 123.5(19) . . ?
C618 N609 K6 115.7(16) . . ?
C608 N609 K6 94.6(18) . . ?
N600 C610 C611 76.5(61) . . ?
O612 C611 C610 117.1(60) . . ?
C611 O612 C613 140.4(47) . . ?
C611 O612 K6 83.4(35) . . ?
C613 O612 K6 62.7(26) . . ?
C614 C613 O612 129.9(62) . . ?
C614 C613 O615 57.6(37) . . ?
O612 C613 O615 172.4(44) . . ?
C614 C613 K6 134.8(48) . . ?
O612 C613 K6 90.9(26) . . ?
O615 C613 K6 81.6(23) . . ?
C613 C614 O615 75.7(48) . . ?
C614 O615 C616 122.5(34) . . ?
C614 O615 C613 46.7(28) . . ?
C616 O615 C613 154.0(34) . . ?
C614 O615 K6 109.7(29) . . ?
C616 O615 K6 109.3(20) . . ?
C613 O615 K6 65.5(24) . . ?
C617 C616 O615 118.2(26) . . ?
C616 C617 N609 118.8(30) . . ?
C616 C617 C618 119.2(24) . . ?
N609 C617 C618 40.5(16) . . ?
C616 C617 K6 83.9(19) . . ?
N609 C617 K6 40.9(16) . . ?
C618 C617 K6 74.9(11) . . ?
N609 C618 C619 106.9(21) . . ?
N609 C618 C617 33.1(13) . . ?
C619 C618 C617 139.9(20) . . ?
O620 C619 C618 132.7(20) . . ?
C619 O620 C621 162.8(18) . . ?
C619 O620 K6 95.2(12) . . ?
C621 O620 K6 79.2(11) . . ?
C622 C621 O620 144.6(20) . . ?
C622 C621 K6 89.3(14) . . ?
O620 C621 K6 66.1(10) . . ?
O623 C622 C621 87.5(21) . . ?
O623 C622 C624 43.9(14) . . ?
C621 C622 C624 131.3(21) . . ?
O623 C622 K6 39.1(13) . . ?
C621 C622 K6 64.3(13) . . ?
C624 C622 K6 75.0(13) . . ?
C624 O623 C622 86.5(22) . . ?
C624 O623 K6 127.0(18) . . ?
C622 O623 K6 123.7(17) . . ?
O623 C624 C625 115.5(25) . . ?
O623 C624 C622 49.6(15) . . ?
C625 C624 C622 113.6(22) . . ?
N600 C625 C624 124.0(23) . . ?
O706 K7 O720 123.9(9) . . ?
O706 K7 O723 82.9(6) . . ?
O720 K7 O723 56.4(9) . . ?
O706 K7 N709 58.2(10) . . ?
O720 K7 N709 112.3(13) . . ?
O723 K7 N709 57.5(10) . . ?
O706 K7 O715 143.1(6) . . ?
O720 K7 O715 93.0(9) . . ?
O723 K7 O715 123.8(6) . . ?
N709 K7 O715 111.7(10) . . ?
O706 K7 O703 61.6(5) . . ?
O720 K7 O703 103.1(9) . . ?
O723 K7 O703 118.4(6) . . ?
N709 K7 O703 119.7(10) . . ?
O715 K7 O703 113.5(5) . . ?
O706 K7 O712 113.5(6) . . ?
O720 K7 O712 100.7(9) . . ?
O723 K7 O712 85.1(6) . . ?
N709 K7 O712 60.4(10) . . ?
O715 K7 O712 52.8(5) . . ?
O703 K7 O712 153.2(6) . . ?
O706 K7 C704 38.2(6) . . ?
O720 K7 C704 107.6(10) . . ?
O723 K7 C704 99.7(7) . . ?
N709 K7 C704 96.1(10) . . ?
O715 K7 C704 136.0(7) . . ?
O703 K7 C704 25.0(6) . . ?
O712 K7 C704 148.8(7) . . ?
O706 K7 C711 77.0(6) . . ?
O720 K7 C711 128.0(10) . . ?
O723 K7 C711 84.9(6) . . ?
N709 K7 C711 33.6(10) . . ?
O715 K7 C711 80.4(6) . . ?
O703 K7 C711 127.0(6) . . ?
O712 K7 C711 36.7(6) . . ?
C704 K7 C711 112.5(7) . . ?
O706 K7 N732 76.8(6) . . ?
O720 K7 N732 153.3(9) . . ?
O723 K7 N732 149.8(6) . . ?
N709 K7 N732 92.6(11) . . ?
O715 K7 N732 67.9(5) . . ?
O703 K7 N732 70.4(5) . . ?
O712 K7 N732 82.8(6) . . ?
C704 K7 N732 77.7(7) . . ?
C711 K7 N732 69.1(6) . . ?
O706 K7 N700 122.1(9) . . ?
O720 K7 N700 72.8(12) . . ?
O723 K7 N700 128.1(10) . . ?
N709 K7 N700 174.1(13) . . ?
O715 K7 N700 64.2(9) . . ?
O703 K7 N700 60.6(9) . . ?
O712 K7 N700 116.4(9) . . ?
C704 K7 N700 84.9(10) . . ?
C711 K7 N700 140.9(10) . . ?
N732 K7 N700 81.9(9) . . ?
O706 K7 C722 86.5(6) . . ?
O720 K7 C722 43.4(9) . . ?
O723 K7 C722 18.0(6) . . ?
N709 K7 C722 74.3(11) . . ?
O715 K7 C722 127.2(6) . . ?
O703 K7 C722 105.8(6) . . ?
O712 K7 C722 99.8(6) . . ?
C704 K7 C722 92.2(7) . . ?
C711 K7 C722 102.9(7) . . ?
N732 K7 C722 162.7(6) . . ?
N700 K7 C722 111.5(10) . . ?
C701 N700 C717 125.4(39) . . ?
C701 N700 C718 124.9(36) . . ?
C717 N700 C718 102.4(29) . . ?
C701 N700 K7 102.9(26) . . ?
C717 N700 K7 98.3(22) . . ?
C718 N700 K7 94.7(21) . . ?
C702 C701 N700 112.1(33) . . ?
C701 C702 O703 163.1(29) . . ?
C701 C702 K7 104.5(19) . . ?
O703 C702 K7 58.7(13) . . ?
C704 O703 C702 168.1(24) . . ?
C704 O703 K7 86.1(15) . . ?
C702 O703 K7 99.9(14) . . ?
O703 C704 C705 159.6(29) . . ?
O703 C704 K7 68.9(14) . . ?
C705 C704 K7 104.4(19) . . ?
C704 C705 O706 97.4(22) . . ?
C705 O706 C707 118.4(19) . . ?
C705 O706 K7 119.3(14) . . ?
C707 O706 K7 121.6(14) . . ?
C708 C707 O706 114.1(25) . . ?
C707 C708 N709 112.9(28) . . ?
C725 N709 C710 118.2(34) . . ?
C725 N709 C708 103.2(29) . . ?
C710 N709 C708 109.1(30) . . ?
C725 N709 K7 106.4(26) . . ?
C710 N709 K7 113.1(24) . . ?
C708 N709 K7 105.8(23) . . ?
C711 C710 N709 68.9(25) . . ?
C710 C711 O712 85.4(23) . . ?
C710 C711 K7 107.7(17) . . ?
O712 C711 K7 70.8(12) . . ?
C713 O712 C711 126.0(20) . . ?
C713 O712 K7 102.3(15) . . ?
C711 O712 K7 72.5(13) . . ?
C714 C713 O712 123.1(30) . . ?
C714 C713 O715 40.3(18) . . ?
O712 C713 O715 110.5(20) . . ?
C714 C713 K7 83.1(21) . . ?
O712 C713 K7 56.8(13) . . ?
O715 C713 K7 54.6(9) . . ?
C713 C714 O715 104.8(26) . . ?
C714 O715 C716 107.2(19) . . ?
C714 O715 C713 34.9(15) . . ?
C716 O715 C713 142.0(16) . . ?
C714 O715 K7 113.4(16) . . ?
C716 O715 K7 112.5(12) . . ?
C713 O715 K7 93.2(11) . . ?
C717 C716 O715 106.7(21) . . ?
C716 C717 N700 126.6(30) . . ?
C719 C718 N700 138.5(27) . . ?
C721 O720 C719 147.3(31) . . ?
C721 O720 K7 102.9(21) . . ?
C719 O720 K7 103.1(21) . . ?
C722 C721 O720 116.6(28) . . ?
C722 C721 O723 43.7(18) . . ?
O720 C721 O723 98.7(21) . . ?
C721 C722 O723 97.2(26) . . ?
C721 C722 K7 84.3(20) . . ?
O723 C722 K7 44.4(13) . . ?
C722 O723 C724 96.7(21) . . ?
C722 O723 C721 39.1(15) . . ?
C724 O723 C721 135.1(18) . . ?
C722 O723 K7 117.6(16) . . ?
C724 O723 K7 108.6(14) . . ?
C721 O723 K7 102.0(11) . . ?
C725 C724 O723 103.3(24) . . ?
C724 C725 N709 129.8(32) . . ?
O5 K8 O89 127.5(7) . . ?
O5 K8 O40 67.1(6) . . ?
O89 K8 O40 102.8(6) . . ?
O5 K8 O3 105.4(6) . . ?
O89 K8 O3 124.6(7) . . ?
O40 K8 O3 112.9(7) . . ?
O5 K8 N11 65.0(7) . . ?
O89 K8 N11 126.3(7) . . ?
O40 K8 N11 125.5(7) . . ?
O3 K8 N11 59.4(6) . . ?
O5 K8 O4 139.8(6) . . ?
O89 K8 O4 84.7(6) . . ?
O40 K8 O4 84.2(6) . . ?
O3 K8 O4 59.6(6) . . ?
N11 K8 O4 118.7(7) . . ?
O5 K8 O97 91.1(7) . . ?
O89 K8 O97 68.1(6) . . ?
O40 K8 O97 145.0(7) . . ?
O3 K8 O97 98.8(6) . . ?
N11 K8 O97 59.1(6) . . ?
O4 K8 O97 126.3(6) . . ?
O5 K8 N10 124.2(6) . . ?
O89 K8 N10 54.4(6) . . ?
O40 K8 N10 60.3(6) . . ?
O3 K8 N10 110.7(7) . . ?
N11 K8 N10 169.4(8) . . ?
O4 K8 N10 51.2(6) . . ?
O97 K8 N10 122.5(6) . . ?
O5 K8 C68 114.5(8) . . ?
O89 K8 C68 27.0(6) . . ?
O40 K8 C68 122.6(7) . . ?
O3 K8 C68 120.3(7) . . ?
N11 K8 C68 100.0(7) . . ?
O4 K8 C68 104.4(7) . . ?
O97 K8 C68 41.2(6) . . ?
N10 K8 C68 81.4(7) . . ?
O5 K8 C900 81.9(7) . . ?
O89 K8 C900 89.0(7) . . ?
O40 K8 C900 147.8(8) . . ?
O3 K8 C900 82.6(7) . . ?
N11 K8 C900 37.7(7) . . ?
O4 K8 C900 127.1(7) . . ?
O97 K8 C900 21.5(5) . . ?
N10 K8 C900 142.7(7) . . ?
C68 K8 C900 62.4(7) . . ?
O5 K8 C7 23.7(6) . . ?
O89 K8 C7 146.3(8) . . ?
O40 K8 C7 80.7(6) . . ?
O3 K8 C7 82.3(6) . . ?
N11 K8 C7 45.8(7) . . ?
O4 K8 C7 128.9(7) . . ?
O97 K8 C7 89.6(7) . . ?
N10 K8 C7 141.0(7) . . ?
C68 K8 C7 124.9(8) . . ?
C900 K8 C7 73.4(7) . . ?
O5 K8 C8 23.3(6) . . ?
O89 K8 C8 123.9(7) . . ?
O40 K8 C8 43.8(6) . . ?
O3 K8 C8 111.2(6) . . ?
N11 K8 C8 85.9(7) . . ?
O4 K8 C8 121.8(7) . . ?
O97 K8 C8 111.7(7) . . ?
N10 K8 C8 102.2(7) . . ?
C68 K8 C8 123.2(8) . . ?
C900 K8 C8 105.0(8) . . ?
C7 K8 C8 40.6(7) . . ?
C1 N11 C6 124.2(21) . . ?
C1 N11 C67 98.8(22) . . ?
C6 N11 C67 95.5(20) . . ?
C1 N11 K8 116.0(17) . . ?
C6 N11 K8 101.9(16) . . ?
C67 N11 K8 120.0(15) . . ?
N11 C1 C2 111.4(20) . . ?
O3 C2 C1 111.5(20) . . ?
C2 O3 C3 111.1(19) . . ?
C2 O3 K8 120.2(15) . . ?
C3 O3 K8 115.0(15) . . ?
O3 C3 C4 109.6(23) . . ?
O4 C4 C3 101.5(22) . . ?
C4 O4 C9 92.1(20) . . ?
C4 O4 K8 114.9(14) . . ?
C9 O4 K8 124.4(15) . . ?
O4 C9 C10 108.2(20) . . ?
N10 C10 C5 63.3(17) . . ?
N10 C10 C9 98.4(20) . . ?
C5 C10 C9 104.3(19) . . ?
N10 C5 C10 49.3(16) . . ?
N10 C5 C567 112.4(22) . . ?
C10 C5 C567 159.0(23) . . ?
N10 C5 K8 60.8(14) . . ?
C10 C5 K8 99.6(16) . . ?
C567 C5 K8 73.9(13) . . ?
C631 N630 K6 105.3(82) . . ?
N630 C631 C632 101.1(94) . . ?
N633 C632 C631 105.9(52) . . ?
N732 C732 C731 107.3(41) . . ?
C732 N732 K7 108.5(20) . . ?
N733 C731 C732 99.0(58) . . ?
C718 C719 O720 124.3(25) . . ?
C90 O89 C68 122.5(20) . . ?
C90 O89 K8 133.8(16) . . ?
C68 O89 K8 102.2(14) . . ?
C8 O5 C7 116.9(21) . . ?
C8 O5 K8 98.9(16) . . ?
C7 O5 K8 104.3(14) . . ?
O40 C130 C8 94.8(20) . . ?
O40 C130 K8 38.9(14) . . ?
C8 C130 K8 65.0(11) . . ?
O5 C8 C130 138.9(21) . . ?
O5 C8 K8 57.9(13) . . ?
C130 C8 K8 83.3(11) . . ?
C130 O40 C567 114.1(22) . . ?
C130 O40 K8 125.9(17) . . ?
C567 O40 K8 106.6(14) . . ?
N11 C6 C7 96.7(20) . . ?
C56 C68 O89 142.3(29) 1_446 . ?
C56 C68 K8 93.3(22) 1_446 . ?
O89 C68 K8 50.8(11) . . ?
C68 C56 O97 125.2(28) 1_664 1_664 ?
C900 C67 N11 113.3(29) . . ?
O40 C567 C5 76.3(17) . . ?
O5 C7 C6 95.3(20) . . ?
O5 C7 K8 51.9(11) . . ?
C6 C7 K8 78.9(13) . . ?
C65 N10 C5 103.2(23) . . ?
C65 N10 C10 116.1(24) . . ?
C5 N10 C10 67.4(18) . . ?
C65 N10 K8 108.7(17) . . ?
C5 N10 K8 92.3(15) . . ?
C10 N10 K8 133.8(17) . . ?
N10 C65 C90 94.6(24) . . ?
C900 O97 C56 149.1(22) . 1_446 ?
C900 O97 K8 106.9(18) . . ?
C56 O97 K8 99.1(12) 1_446 . ?
O89 C90 C65 102.4(21) . . ?
C67 C900 O97 134.5(35) . . ?
C67 C900 K8 83.4(24) . . ?
O97 C900 K8 51.6(16) . . ?
 
_refine_diff_density_max    3.481
_refine_diff_density_min   -5.959
_refine_diff_density_rms    0.323

#===END

data_Sn9Mo(CO)34-
 
_audit_creation_method            SHELXL
_chemical_name_systematic
;
  ?
;
_chemical_name_common             ?
_chemical_formula_moiety          ?
_chemical_formula_structural      ?
_chemical_formula_analytical      ?
_chemical_formula_sum             'C77 H152 K4 Mo N10 O27 Sn9'
_chemical_formula_weight          2970.64
_chemical_melting_point           ?
_chemical_compound_source         ?
 
loop_
  _atom_type_symbol
  _atom_type_description
  _atom_type_scat_dispersion_real
  _atom_type_scat_dispersion_imag
  _atom_type_scat_source
  'C'  'C'   0.0033   0.0016
  'International Tables Vol C Tables 4.2.6.8 and 6.1.1.4'
  'H'  'H'   0.0000   0.0000
  'International Tables Vol C Tables 4.2.6.8 and 6.1.1.4'
  'N'  'N'   0.0061   0.0033
  'International Tables Vol C Tables 4.2.6.8 and 6.1.1.4'
  'O'  'O'   0.0106   0.0060
  'International Tables Vol C Tables 4.2.6.8 and 6.1.1.4'
  'K'  'K'   0.2009   0.2494
  'International Tables Vol C Tables 4.2.6.8 and 6.1.1.4'
  'Mo'  'Mo'  -1.6832   0.6857
  'International Tables Vol C Tables 4.2.6.8 and 6.1.1.4'
  'Sn'  'Sn'  -0.6537   1.4246
  'International Tables Vol C Tables 4.2.6.8 and 6.1.1.4'
 
_symmetry_cell_setting            ?
_symmetry_space_group_name_H-M    ?
 
loop_
  _symmetry_equiv_pos_as_xyz
  'x, y, z'
  '-x, -y, -z'
 
_cell_length_a                    16.187(3)
_cell_length_b                    25.832(4)
_cell_length_c                    29.855(5)
_cell_angle_alpha                 111.460(10)
_cell_angle_beta                  102.84(2)
_cell_angle_gamma                 92.87(2)
_cell_volume                      11208.3(33)
_cell_formula_units_Z             4
_cell_measurement_temperature     178(2)
_cell_measurement_reflns_used     ?
_cell_measurement_theta_min       ?
_cell_measurement_theta_max       ?
 
_exptl_crystal_description        ?
_exptl_crystal_colour             ?
_exptl_crystal_size_max           0.51
_exptl_crystal_size_mid           0.44
_exptl_crystal_size_min           0.33
_exptl_crystal_density_meas       ?
_exptl_crystal_density_diffrn     1.760
_exptl_crystal_density_method     ?
_exptl_crystal_F_000              5872
_exptl_absorpt_coefficient_mu     2.293
_exptl_absorpt_correction_type    ?
_exptl_absorpt_correction_T_min   ?
_exptl_absorpt_correction_T_max   ?
 
_exptl_special_details
;
  ?
;
 
_diffrn_ambient_temperature       178(2)
_diffrn_radiation_wavelength      0.71073
_diffrn_radiation_type            MoK\a
_diffrn_radiation_source          'fine-focus sealed tube'
_diffrn_radiation_monochromator   graphite
_diffrn_measurement_device        ?
_diffrn_measurement_method        ?
_diffrn_standards_number          ?
_diffrn_standards_interval_count  ?
_diffrn_standards_interval_time   ?
_diffrn_standards_decay_%         ?
_diffrn_reflns_number             31594
_diffrn_reflns_av_R_equivalents   0.0969
_diffrn_reflns_av_sigmaI/netI     0.0719
_diffrn_reflns_limit_h_min        0
_diffrn_reflns_limit_h_max        17
_diffrn_reflns_limit_k_min        -26
_diffrn_reflns_limit_k_max        26
_diffrn_reflns_limit_l_min        -32
_diffrn_reflns_limit_l_max        32
_diffrn_reflns_theta_min          1.52
_diffrn_reflns_theta_max          23.06
_reflns_number_total              30064
_reflns_number_observed           19043
_reflns_observed_criterion        >2sigma(I)
 
_computing_data_collection        ?
_computing_cell_refinement        ?
_computing_data_reduction         ?
_computing_structure_solution     'SHELXS-86 (Sheldrick, 1990)'
_computing_structure_refinement   'SHELXL-93 (Sheldrick, 1993)'
_computing_molecular_graphics     ?
_computing_publication_material   ?
 
_refine_special_details
;
  Refinement on F^2^ for ALL reflections except for 15 with very negative F^2^
  or flagged by the user for potential systematic errors.  Weighted R-factors
  wR and all goodnesses of fit S are based on F^2^, conventional R-factors R
  are based on F, with F set to zero for negative F^2^. The observed criterion
  of F^2^ > 2sigma(F^2^) is used only for calculating _R_factor_obs etc. and is
  not relevant to the choice of reflections for refinement.  R-factors based
  on F^2^ are statistically about twice as large as those based on F, and R-
  factors based on ALL data will be even larger.
;
 
_refine_ls_structure_factor_coef  Fsqd
_refine_ls_matrix_type            fullcycle
_refine_ls_weighting_scheme
  'calc w=1/[\s^2^(Fo^2^)+(0.1404P)^2^+0.0000P] where P=(Fo^2^+2Fc^2^)/3'
_atom_sites_solution_primary      direct
_atom_sites_solution_secondary    difmap
_atom_sites_solution_hydrogens    geom
_refine_ls_hydrogen_treatment     ?
_refine_ls_extinction_method      none
_refine_ls_extinction_coef        ?
_refine_ls_number_reflns          30049
_refine_ls_number_parameters      1923
_refine_ls_number_restraints      1020
_refine_ls_R_factor_all           0.1554
_refine_ls_R_factor_obs           0.0982
_refine_ls_wR_factor_all          0.3186
_refine_ls_wR_factor_obs          0.2759
_refine_ls_goodness_of_fit_all    1.498
_refine_ls_goodness_of_fit_obs    1.669
_refine_ls_restrained_S_all       1.491
_refine_ls_restrained_S_obs       1.621
_refine_ls_shift/esd_max          1.092
_refine_ls_shift/esd_mean         0.028
 
loop_
  _atom_site_label
  _atom_site_type_symbol
  _atom_site_fract_x
  _atom_site_fract_y
  _atom_site_fract_z
  _atom_site_U_iso_or_equiv
  _atom_site_thermal_displace_type
  _atom_site_occupancy
  _atom_site_calc_flag
  _atom_site_refinement_flags
  _atom_site_disorder_group
Sn11 Sn 0.68771(10) 0.95568(6) 0.66877(5) 0.057 Uani 1 d . .
Sn12 Sn 0.77706(10) 0.88663(6) 0.71885(5) 0.059 Uani 1 d . .
Sn13 Sn 0.57446(11) 0.86939(6) 0.67627(4) 0.066 Uani 1 d . .
Sn14 Sn 0.57826(9) 1.00468(6) 0.73629(5) 0.052 Uani 1 d . .
Sn15 Sn 0.77791(9) 1.01731(5) 0.77491(5) 0.051 Uani 1 d . .
Sn16 Sn 0.79356(9) 0.93827(5) 0.82800(5) 0.051 Uani 1 d . .
Sn17 Sn 0.65561(10) 0.83799(5) 0.75958(4) 0.055 Uani 1 d . .
Sn18 Sn 0.51901(9) 0.91834(6) 0.76929(5) 0.051 Uani 1 d . .
Sn19 Sn 0.65904(9) 1.01619(5) 0.83851(4) 0.046 Uani 1 d . .
Mo1 Mo 0.63604(11) 0.91151(6) 0.85892(5) 0.042 Uani 1 d . .
C11 C 0.7206(14) 0.9019(7) 0.9092(6) 0.060 Uani 1 d U .
O11 O 0.7682(9) 0.8965(6) 0.9419(5) 0.071 Uani 1 d U .
C12 C 0.5655(14) 0.8547(8) 0.8628(6) 0.062 Uani 1 d U .
O12 O 0.5183(9) 0.8197(5) 0.8668(4) 0.066 Uani 1 d U .
C13 C 0.5830(12) 0.9541(7) 0.9074(7) 0.054 Uani 1 d U .
O13 O 0.5509(10) 0.9786(6) 0.9407(5) 0.074 Uani 1 d U .
Sn21 Sn 0.16494(15) 0.41045(8) 0.86490(6) 0.101 Uani 1 d . .
Sn22 Sn 0.27224(12) 0.35123(8) 0.79908(7) 0.089 Uani 1 d . .
Sn23 Sn 0.28045(13) 0.48564(7) 0.84399(5) 0.085 Uani 1 d . .
Sn24 Sn 0.08011(12) 0.47218(7) 0.80558(6) 0.080 Uani 1 d . .
Sn25 Sn 0.07124(10) 0.33881(6) 0.76172(5) 0.062 Uani 1 d . .
Sn26 Sn 0.18707(11) 0.32379(5) 0.69422(6) 0.067 Uani 1 d . .
Sn27 Sn 0.33204(10) 0.42380(6) 0.75271(5) 0.057 Uani 1 d . .
Sn28 Sn 0.19831(11) 0.50590(5) 0.75409(5) 0.063 Uani 1 d . .
Sn29 Sn 0.05418(10) 0.40507(6) 0.69761(5) 0.061 Uani 1 d . .
Mo2 Mo 0.20762(13) 0.41487(7) 0.65867(6) 0.056 Uani 1 d . .
C21 C 0.2958(13) 0.4557(7) 0.6559(6) 0.052 Uani 1 d U .
O21 O 0.3461(11) 0.4866(7) 0.6455(6) 0.095 Uani 1 d U .
C22 C 0.1217(17) 0.4307(10) 0.6149(9) 0.083 Uani 1 d U .
O22 O 0.0800(11) 0.4394(7) 0.5806(6) 0.092 Uani 1 d U .
C23 C 0.2317(16) 0.3558(10) 0.6081(8) 0.079 Uani 1 d U .
O23 O 0.2505(13) 0.3154(8) 0.5743(7) 0.114 Uani 1 d U .
K1 K 0.8584(3) 0.19673(13) 1.06821(12) 0.038 Uani 1 d . .
N100 N 0.8150(11) 0.3009(5) 1.1411(5) 0.052 Uani 1 d U .
C101 C 0.8619(14) 0.3072(9) 1.1926(7) 0.067 Uani 1 d U .
H10A H 0.8589(14) 0.3453(9) 1.2161(7) 0.081 Uiso 1 calc R .
H10L H 0.8314(14) 0.2800(9) 1.2018(7) 0.081 Uiso 1 calc R .
C102 C 0.9494(12) 0.2991(7) 1.1996(6) 0.045 Uani 1 d U .
H10B H 0.9811(12) 0.3263(7) 1.1910(6) 0.054 Uiso 1 calc R .
H10C H 0.9746(12) 0.3065(7) 1.2352(6) 0.054 Uiso 1 calc R .
O103 O 0.9590(7) 0.2441(4) 1.1701(3) 0.041 Uani 1 d U .
C104 C 1.0423(12) 0.2323(7) 1.1758(6) 0.049 Uani 1 d U .
H10D H 1.0693(12) 0.2432(7) 1.2117(6) 0.059 Uiso 1 calc R .
H10E H 1.0747(12) 0.2557(7) 1.1638(6) 0.059 Uiso 1 calc R .
C105 C 1.0498(12) 0.1740(7) 1.1497(6) 0.046 Uani 1 d U .
H10F H 1.1105(12) 0.1682(7) 1.1573(6) 0.055 Uiso 1 calc R .
H10G H 1.0165(12) 0.1496(7) 1.1604(6) 0.055 Uiso 1 calc R .
O106 O 1.0169(7) 0.1599(4) 1.0962(4) 0.037 Uani 1 d U .
C107 C 1.0255(12) 0.1050(7) 1.0678(6) 0.046 Uani 1 d U .
H10H H 0.9919(12) 0.0785(7) 1.0763(6) 0.055 Uiso 1 calc R .
H10I H 1.0864(12) 0.0998(7) 1.0761(6) 0.055 Uiso 1 calc R .
C108 C 0.9950(12) 0.0918(7) 1.0126(6) 0.051 Uani 1 d U .
H10J H 1.0282(12) 0.1186(7) 1.0043(6) 0.061 Uiso 1 calc R .
H10K H 1.0060(12) 0.0535(7) 0.9938(6) 0.061 Uiso 1 calc R .
N109 N 0.9043(11) 0.0949(5) 0.9973(5) 0.052 Uani 1 d U .
C110 C 0.8826(14) 0.0979(8) 0.9461(7) 0.060 Uani 1 d U .
H11A H 0.9091(14) 0.0691(8) 0.9236(7) 0.072 Uiso 1 calc R .
H11B H 0.8198(14) 0.0893(8) 0.9319(7) 0.072 Uiso 1 calc R .
C111 C 0.9140(15) 0.1551(8) 0.9486(8) 0.070 Uani 1 d U .
H11C H 0.9763(15) 0.1648(8) 0.9645(8) 0.084 Uiso 1 calc R .
H11D H 0.9040(15) 0.1546(8) 0.9145(8) 0.084 Uiso 1 calc R .
O112 O 0.8707(10) 0.1955(5) 0.9761(4) 0.065 Uani 1 d U .
C113 C 0.8862(15) 0.2460(8) 0.9719(8) 0.072 Uani 1 d U .
H11E H 0.8725(15) 0.2408(8) 0.9364(8) 0.087 Uiso 1 calc R .
H11F H 0.9473(15) 0.2622(8) 0.9873(8) 0.087 Uiso 1 calc R .
C114 C 0.8304(15) 0.2845(9) 0.9983(7) 0.072 Uani 1 d U .
H11G H 0.8348(15) 0.3200(9) 0.9928(7) 0.087 Uiso 1 calc R .
H11H H 0.7699(15) 0.2665(9) 0.9850(7) 0.087 Uiso 1 calc R .
O115 O 0.8577(10) 0.2962(5) 1.0504(4) 0.064 Uani 1 d U .
C116 C 0.8200(15) 0.3420(9) 1.0805(7) 0.071 Uani 1 d U .
H11I H 0.8380(15) 0.3771(9) 1.0768(7) 0.085 Uiso 1 calc R .
H11J H 0.7568(15) 0.3334(9) 1.0686(7) 0.085 Uiso 1 calc R .
C117 C 0.8458(13) 0.3498(7) 1.1313(6) 0.053 Uani 1 d U .
H11K H 0.8239(13) 0.3834(7) 1.1513(6) 0.064 Uiso 1 calc R .
H11L H 0.9091(13) 0.3570(7) 1.1426(6) 0.064 Uiso 1 calc R .
C118 C 0.7226(13) 0.2967(8) 1.1354(7) 0.062 Uani 1 d U .
H11M H 0.7112(13) 0.3253(8) 1.1653(7) 0.074 Uiso 1 calc R .
H11N H 0.6954(13) 0.3052(8) 1.1062(7) 0.074 Uiso 1 calc R .
C119 C 0.6835(14) 0.2408(8) 1.1287(7) 0.062 Uani 1 d U .
H11O H 0.6220(14) 0.2409(8) 1.1279(7) 0.074 Uiso 1 calc R .
H11P H 0.7121(14) 0.2308(8) 1.1567(7) 0.074 Uiso 1 calc R .
O120 O 0.6934(9) 0.1999(5) 1.0816(4) 0.060 Uani 1 d U .
C121 C 0.6470(15) 0.1443(8) 1.0707(7) 0.068 Uani 1 d U .
H12A H 0.6690(15) 0.1319(8) 1.0983(7) 0.081 Uiso 1 calc R .
H12B H 0.5852(15) 0.1465(8) 1.0675(7) 0.081 Uiso 1 calc R .
C122 C 0.6595(15) 0.1046(9) 1.0249(7) 0.071 Uani 1 d U .
H12C H 0.6236(15) 0.0681(9) 1.0153(7) 0.085 Uiso 1 calc R .
H12D H 0.6416(15) 0.1186(9) 0.9980(7) 0.085 Uiso 1 calc R .
O123 O 0.7456(8) 0.0970(4) 1.0308(4) 0.053 Uani 1 d U .
C124 C 0.7592(13) 0.0514(7) 0.9885(6) 0.055 Uani 1 d U .
H12E H 0.7368(13) 0.0582(7) 0.9578(6) 0.065 Uiso 1 calc R .
H12F H 0.7275(13) 0.0158(7) 0.9850(6) 0.065 Uiso 1 calc R .
C125 C 0.8515(13) 0.0465(8) 0.9949(7) 0.062 Uani 1 d U .
H12G H 0.8731(13) 0.0402(8) 1.0260(7) 0.075 Uiso 1 calc R .
H12H H 0.8579(13) 0.0130(8) 0.9669(7) 0.075 Uiso 1 calc R .
K2 K 0.2853(3) 0.45273(14) 0.42086(12) 0.040 Uani 1 d . .
N200 N 0.3321(10) 0.3537(5) 0.3483(4) 0.047 Uani 1 d U .
C201 C 0.4282(13) 0.3603(7) 0.3548(7) 0.055 Uani 1 d U .
H20A H 0.4570(13) 0.3539(7) 0.3848(7) 0.067 Uiso 1 calc R .
H20B H 0.4418(13) 0.3319(7) 0.3256(7) 0.067 Uiso 1 calc R .
C202 C 0.4606(14) 0.4174(8) 0.3598(7) 0.063 Uani 1 d U .
H20C H 0.5205(14) 0.4192(8) 0.3573(7) 0.076 Uiso 1 calc R .
H20D H 0.4252(14) 0.4270(8) 0.3331(7) 0.076 Uiso 1 calc R .
O203 O 0.4559(8) 0.4561(5) 0.4078(4) 0.051 Uani 1 d U .
C204 C 0.4965(15) 0.5106(8) 0.4179(7) 0.073 Uani 1 d U .
H20E H 0.4692(15) 0.5230(8) 0.3911(7) 0.087 Uiso 1 calc R .
H20F H 0.5575(15) 0.5090(8) 0.4178(7) 0.087 Uiso 1 calc R .
C205 C 0.4909(15) 0.5519(9) 0.4665(8) 0.078 Uani 1 d U .
H20G H 0.5168(15) 0.5396(9) 0.4936(8) 0.094 Uiso 1 calc R .
H20H H 0.5219(15) 0.5891(9) 0.4734(8) 0.094 Uiso 1 calc R .
O206 O 0.4009(8) 0.5551(4) 0.4635(4) 0.051 Uani 1 d U .
C207 C 0.3871(15) 0.5968(9) 0.5059(8) 0.074 Uani 1 d U .
H20I H 0.4077(15) 0.5868(9) 0.5350(8) 0.089 Uiso 1 calc R .
H20K H 0.4212(15) 0.6329(9) 0.5122(8) 0.089 Uiso 1 calc R .
C208 C 0.3000(14) 0.6042(8) 0.5011(8) 0.069 Uani 1 d U .
H20J H 0.2797(14) 0.6142(8) 0.4719(8) 0.082 Uiso 1 calc R .
H20L H 0.2956(14) 0.6362(8) 0.5310(8) 0.082 Uiso 1 calc R .
N209 N 0.2441(12) 0.5554(7) 0.4952(5) 0.065 Uani 1 d U .
C210 C 0.1545(14) 0.5580(8) 0.4755(7) 0.063 Uani 1 d U .
H21A H 0.1411(14) 0.5947(8) 0.4962(7) 0.076 Uiso 1 calc R .
H21B H 0.1194(14) 0.5285(8) 0.4797(7) 0.076 Uiso 1 calc R .
C211 C 0.1259(14) 0.5510(8) 0.4212(7) 0.060 Uani 1 d U .
H21C H 0.0655(14) 0.5572(8) 0.4127(7) 0.073 Uiso 1 calc R .
H21D H 0.1621(14) 0.5782(8) 0.4148(7) 0.073 Uiso 1 calc R .
O212 O 0.1352(8) 0.4942(5) 0.3921(4) 0.053 Uani 1 d U .
C213 C 0.1041(14) 0.4824(8) 0.3393(7) 0.062 Uani 1 d U .
H21E H 0.1393(14) 0.5073(8) 0.3300(7) 0.075 Uiso 1 calc R .
H21F H 0.0441(14) 0.4897(8) 0.3319(7) 0.075 Uiso 1 calc R .
C214 C 0.1091(13) 0.4222(7) 0.3101(7) 0.057 Uani 1 d U .
H21G H 0.0743(13) 0.3976(7) 0.3198(7) 0.068 Uiso 1 calc R .
H21H H 0.0855(13) 0.4133(7) 0.2741(7) 0.068 Uiso 1 calc R .
O215 O 0.1921(8) 0.4120(5) 0.3185(4) 0.052 Uani 1 d U .
C216 C 0.1996(13) 0.3558(8) 0.2903(7) 0.060 Uani 1 d U .
H21I H 0.1685(13) 0.3303(8) 0.3010(7) 0.072 Uiso 1 calc R .
H21J H 0.1723(13) 0.3467(8) 0.2547(7) 0.072 Uiso 1 calc R .
C217 C 0.2859(13) 0.3462(8) 0.2959(7) 0.058 Uani 1 d U .
H21K H 0.3170(13) 0.3724(8) 0.2859(7) 0.070 Uiso 1 calc R .
H21L H 0.2875(13) 0.3074(8) 0.2730(7) 0.070 Uiso 1 calc R .
C218 C 0.3071(14) 0.3033(8) 0.3580(7) 0.063 Uani 1 d U .
H21M H 0.2446(14) 0.2915(8) 0.3438(7) 0.076 Uiso 1 calc R .
H21N H 0.3358(14) 0.2722(8) 0.3401(7) 0.076 Uiso 1 calc R .
C219 C 0.3280(14) 0.3112(8) 0.4112(7) 0.066 Uani 1 d U .
H21O H 0.3111(14) 0.2754(8) 0.4142(7) 0.080 Uiso 1 calc R .
H21P H 0.3904(14) 0.3225(8) 0.4261(7) 0.080 Uiso 1 calc R .
O220 O 0.2838(9) 0.3528(5) 0.4364(4) 0.053 Uani 1 d U .
C221 C 0.2912(13) 0.3564(8) 0.4865(7) 0.057 Uani 1 d U .
H22A H 0.3515(13) 0.3694(8) 0.5063(7) 0.069 Uiso 1 calc R .
H22B H 0.2738(13) 0.3188(8) 0.4859(7) 0.069 Uiso 1 calc R .
C222 C 0.2340(14) 0.3974(8) 0.5102(7) 0.063 Uani 1 d U .
H22C H 0.1736(14) 0.3852(8) 0.4904(7) 0.075 Uiso 1 calc R .
H22D H 0.2375(14) 0.4000(8) 0.5445(7) 0.075 Uiso 1 calc R .
O223 O 0.2657(10) 0.4509(6) 0.5108(5) 0.068 Uani 1 d U .
C224 C 0.2168(15) 0.4931(8) 0.5388(8) 0.067 Uani 1 d U .
H22E H 0.2242(15) 0.4939(8) 0.5728(8) 0.081 Uiso 1 calc R .
H22F H 0.1550(15) 0.4838(8) 0.5215(8) 0.081 Uiso 1 calc R .
C225 C 0.2530(14) 0.5492(8) 0.5406(7) 0.065 Uani 1 d U .
H22G H 0.2255(14) 0.5786(8) 0.5616(7) 0.078 Uiso 1 calc R .
H22H H 0.3149(14) 0.5566(8) 0.5577(7) 0.078 Uiso 1 calc R .
K3 K 0.6945(3) 0.6086(2) 0.85725(13) 0.049 Uani 1 d . .
N300 N 0.5131(10) 0.6135(6) 0.8135(5) 0.053 Uani 1 d U .
C301 C 0.4887(12) 0.5808(7) 0.7582(6) 0.045 Uani 1 d U .
H30A H 0.4257(12) 0.5711(7) 0.7463(6) 0.054 Uiso 1 calc R .
H30B H 0.5070(12) 0.6046(7) 0.7416(6) 0.054 Uiso 1 calc R .
C302 C 0.5281(12) 0.5284(7) 0.7437(6) 0.048 Uani 1 d U .
H30C H 0.5141(12) 0.5057(7) 0.7622(6) 0.058 Uiso 1 calc R .
H30D H 0.5047(12) 0.5058(7) 0.7076(6) 0.058 Uiso 1 calc R .
O303 O 0.6184(8) 0.5421(5) 0.7546(4) 0.052 Uani 1 d U .
C304 C 0.6592(12) 0.4928(7) 0.7331(7) 0.053 Uani 1 d U .
H30E H 0.6415(12) 0.4787(7) 0.6963(7) 0.063 Uiso 1 calc R .
H30F H 0.6418(12) 0.4624(7) 0.7433(7) 0.063 Uiso 1 calc R .
C305 C 0.7543(14) 0.5102(9) 0.7516(7) 0.072 Uani 1 d U .
H30G H 0.7842(14) 0.4789(9) 0.7353(7) 0.087 Uiso 1 calc R .
H30H H 0.7712(14) 0.5428(9) 0.7440(7) 0.087 Uiso 1 calc R .
O306 O 0.7759(10) 0.5246(6) 0.8028(5) 0.070 Uani 1 d U .
C307 C 0.8674(17) 0.5302(11) 0.8179(9) 0.091 Uani 1 d U .
H30I H 0.8937(17) 0.5616(11) 0.8118(9) 0.109 Uiso 1 calc R .
H30J H 0.8876(17) 0.4952(11) 0.7991(9) 0.109 Uiso 1 calc R .
C308 C 0.8914(18) 0.5419(10) 0.8736(9) 0.094 Uani 1 d U .
H30K H 0.9531(18) 0.5398(10) 0.8844(9) 0.113 Uiso 1 calc R .
H30L H 0.8588(18) 0.5125(10) 0.8793(9) 0.113 Uiso 1 calc R .
N309 N 0.8735(14) 0.5976(8) 0.9040(6) 0.085 Uani 1 d U .
C310 C 0.8794(18) 0.6013(11) 0.9539(9) 0.100 Uani 1 d U .
H31A H 0.9342(18) 0.5897(11) 0.9665(9) 0.120 Uiso 1 calc R .
H31B H 0.8800(18) 0.6409(11) 0.9756(9) 0.120 Uiso 1 calc R .
C311 C 0.8095(17) 0.5666(11) 0.9573(10) 0.096 Uani 1 d U .
H31C H 0.8076(17) 0.5270(11) 0.9350(10) 0.115 Uiso 1 calc R .
H31M H 0.8197(17) 0.5685(11) 0.9918(10) 0.115 Uiso 1 calc R .
O312 O 0.7297(12) 0.5846(7) 0.9437(7) 0.102 Uani 1 d U .
C313 C 0.6634(22) 0.5570(14) 0.9500(12) 0.132 Uani 1 d U .
H31D H 0.6503(22) 0.5179(14) 0.9251(12) 0.159 Uiso 1 calc R .
H31N H 0.6780(22) 0.5560(14) 0.9837(12) 0.159 Uiso 1 calc R .
C314 C 0.5941(24) 0.5841(15) 0.9445(13) 0.153 Uani 1 d U .
H31E H 0.5468(24) 0.5651(15) 0.9516(13) 0.184 Uiso 1 calc R .
H31O H 0.6089(24) 0.6229(15) 0.9700(13) 0.184 Uiso 1 calc R .
O315 O 0.5669(10) 0.5866(9) 0.9026(5) 0.120 Uani 1 d U .
C316 C 0.4921(15) 0.6105(9) 0.8918(7) 0.069 Uani 1 d U .
H31F H 0.5057(15) 0.6520(9) 0.9060(7) 0.083 Uiso 1 calc R .
H31G H 0.4488(15) 0.5999(9) 0.9069(7) 0.083 Uiso 1 calc R .
C317 C 0.4565(14) 0.5889(8) 0.8351(7) 0.061 Uani 1 d U .
H31H H 0.4519(14) 0.5474(8) 0.8204(7) 0.074 Uiso 1 calc R .
H31I H 0.3985(14) 0.5991(8) 0.8271(7) 0.074 Uiso 1 calc R .
C318 C 0.5079(14) 0.6731(8) 0.8235(7) 0.065 Uani 1 d U .
H31J H 0.4538(14) 0.6761(8) 0.8019(7) 0.078 Uiso 1 calc R .
H31K H 0.5060(14) 0.6926(8) 0.8585(7) 0.078 Uiso 1 calc R .
C319 C 0.5797(13) 0.7019(8) 0.8149(7) 0.064 Uani 1 d U .
H31L H 0.5890(13) 0.6794(8) 0.7820(7) 0.077 Uiso 1 calc R .
H31P H 0.5667(13) 0.7390(8) 0.8150(7) 0.077 Uiso 1 calc R .
O320 O 0.6548(9) 0.7091(5) 0.8533(5) 0.061 Uani 1 d U .
C321 C 0.7238(13) 0.7491(8) 0.8557(7) 0.056 Uani 1 d U .
H32A H 0.7056(13) 0.7866(8) 0.8622(7) 0.067 Uiso 1 calc R .
H32B H 0.7406(13) 0.7365(8) 0.8238(7) 0.067 Uiso 1 calc R .
C322 C 0.7953(15) 0.7516(9) 0.8963(8) 0.076 Uani 1 d U .
H32C H 0.8412(15) 0.7820(9) 0.9023(8) 0.091 Uiso 1 calc R .
H32D H 0.7759(15) 0.7604(9) 0.9271(8) 0.091 Uiso 1 calc R .
O323 O 0.8277(9) 0.7002(6) 0.8847(5) 0.067 Uani 1 d U .
C324 C 0.8978(17) 0.7022(10) 0.9211(9) 0.093 Uani 1 d U .
H32E H 0.8819(17) 0.7107(10) 0.9529(9) 0.112 Uiso 1 calc R .
H32F H 0.9429(17) 0.7325(10) 0.9260(9) 0.112 Uiso 1 calc R .
C325 C 0.9316(19) 0.6470(11) 0.9066(11) 0.111 Uani 1 d U .
H32G H 0.9434(19) 0.6380(11) 0.8736(11) 0.133 Uiso 1 calc R .
H32H H 0.9869(19) 0.6514(11) 0.9309(11) 0.133 Uiso 1 calc R .
K4 K 0.1661(3) 0.7423(2) 0.66433(14) 0.049 Uani 1 d . .
N400 N 0.3461(10) 0.7289(6) 0.6986(5) 0.057 Uani 1 d U .
C401 C 0.3736(13) 0.7580(7) 0.7546(6) 0.055 Uani 1 d U .
H40A H 0.3526(13) 0.7329(7) 0.7693(6) 0.066 Uiso 1 calc R .
H40B H 0.4369(13) 0.7643(7) 0.7656(6) 0.066 Uiso 1 calc R .
C402 C 0.3423(13) 0.8120(7) 0.7740(7) 0.056 Uani 1 d U .
H40C H 0.3707(13) 0.8321(7) 0.8099(7) 0.068 Uiso 1 calc R .
H40D H 0.3557(13) 0.8358(7) 0.7562(7) 0.068 Uiso 1 calc R .
O403 O 0.2523(8) 0.8021(4) 0.7669(4) 0.048 Uani 1 d U .
C404 C 0.2202(13) 0.8544(8) 0.7891(7) 0.058 Uani 1 d U .
H40E H 0.2382(13) 0.8820(8) 0.7760(7) 0.070 Uiso 1 calc R .
H40F H 0.2444(13) 0.8702(8) 0.8257(7) 0.070 Uiso 1 calc R .
C405 C 0.1226(13) 0.8438(8) 0.7769(7) 0.060 Uani 1 d U .
H40G H 0.1049(13) 0.8147(8) 0.7885(7) 0.072 Uiso 1 calc R .
H40H H 0.1013(13) 0.8788(8) 0.7947(7) 0.072 Uiso 1 calc R .
O406 O 0.0879(10) 0.8267(6) 0.7278(4) 0.069 Uani 1 d U .
C407 C -0.0001(18) 0.8163(11) 0.7157(9) 0.098 Uani 1 d U .
H40I H -0.0226(18) 0.8491(11) 0.7363(9) 0.117 Uiso 1 calc R .
H40L H -0.0184(18) 0.7833(11) 0.7225(9) 0.117 Uiso 1 calc R .
C408 C -0.0340(20) 0.8053(12) 0.6634(10) 0.113 Uani 1 d U .
H40J H -0.0119(20) 0.8381(12) 0.6575(10) 0.136 Uiso 1 calc R .
H40K H -0.0969(20) 0.8038(12) 0.6569(10) 0.136 Uiso 1 calc R .
N409 N -0.0166(15) 0.7555(8) 0.6269(7) 0.097 Uani 1 d U .
C410 C -0.0708(25) 0.7028(15) 0.6188(14) 0.163 Uani 1 d U .
H41A H -0.1262(25) 0.7000(15) 0.5953(14) 0.196 Uiso 1 calc R .
H41B H -0.0828(25) 0.7069(15) 0.6509(14) 0.196 Uiso 1 calc R .
C411 C -0.0361(21) 0.6465(13) 0.5989(12) 0.129 Uani 1 d U .
H41C H -0.0806(21) 0.6147(13) 0.5914(12) 0.155 Uiso 1 calc R .
H41D H -0.0193(21) 0.6421(13) 0.5679(12) 0.155 Uiso 1 calc R .
O412 O 0.0333(9) 0.6475(6) 0.6348(5) 0.075 Uani 1 d U .
C413 C 0.0653(15) 0.5929(9) 0.6179(8) 0.071 Uani 1 d U .
H41E H 0.0787(15) 0.5855(9) 0.5856(8) 0.085 Uiso 1 calc R .
H41F H 0.0206(15) 0.5624(9) 0.6132(8) 0.085 Uiso 1 calc R .
C414 C 0.1432(14) 0.5938(8) 0.6554(7) 0.065 Uani 1 d U .
H41G H 0.1313(14) 0.6037(8) 0.6884(7) 0.078 Uiso 1 calc R .
H41H H 0.1624(14) 0.5564(8) 0.6457(7) 0.078 Uiso 1 calc R .
O415 O 0.2069(8) 0.6345(5) 0.6572(4) 0.053 Uani 1 d U .
C416 C 0.2882(14) 0.6340(9) 0.6914(7) 0.068 Uani 1 d U .
H41I H 0.3017(14) 0.5952(9) 0.6835(7) 0.081 Uiso 1 calc R .
H41J H 0.2847(14) 0.6500(9) 0.7264(7) 0.081 Uiso 1 calc R .
C417 C 0.3552(15) 0.6698(8) 0.6830(8) 0.072 Uani 1 d U .
H41K H 0.4124(15) 0.6664(8) 0.7011(8) 0.086 Uiso 1 calc R .
H41L H 0.3530(15) 0.6547(8) 0.6470(8) 0.086 Uiso 1 calc R .
C418 C 0.4026(15) 0.7588(9) 0.6786(7) 0.070 Uani 1 d U .
H41M H 0.4578(15) 0.7439(9) 0.6796(7) 0.084 Uiso 1 calc R .
H41N H 0.4144(15) 0.7995(9) 0.6997(7) 0.084 Uiso 1 calc R .
C419 C 0.3554(20) 0.7494(12) 0.6226(10) 0.110 Uani 1 d U .
H41O H 0.3953(20) 0.7651(12) 0.6084(10) 0.132 Uiso 1 calc R .
H41P H 0.3403(20) 0.7086(12) 0.6023(10) 0.132 Uiso 1 calc R .
O420 O 0.2860(12) 0.7730(9) 0.6196(6) 0.112 Uani 1 d U .
C421 C 0.2528(15) 0.7772(9) 0.5738(8) 0.074 Uani 1 d U .
H42A H 0.2967(15) 0.7991(9) 0.5669(8) 0.088 Uiso 1 calc R .
H42E H 0.2390(15) 0.7391(9) 0.5470(8) 0.088 Uiso 1 calc R .
C422 C 0.1822(20) 0.8021(13) 0.5736(11) 0.117 Uani 1 d U .
H42B H 0.1627(20) 0.8053(13) 0.5410(11) 0.141 Uiso 1 calc R .
H42F H 0.1978(20) 0.8408(13) 0.5994(11) 0.141 Uiso 1 calc R .
O423 O 0.1122(13) 0.7749(7) 0.5822(6) 0.098 Uani 1 d U .
C424 C 0.0387(16) 0.7957(10) 0.5780(9) 0.085 Uani 1 d U .
H42C H 0.0206(16) 0.7992(10) 0.5454(9) 0.102 Uiso 1 calc R .
H42G H 0.0451(16) 0.8334(10) 0.6048(9) 0.102 Uiso 1 calc R .
C425 C -0.0211(21) 0.7588(13) 0.5821(11) 0.122 Uani 1 d U .
H42D H -0.0185(21) 0.7207(13) 0.5583(11) 0.147 Uiso 1 calc R .
H42H H -0.0783(21) 0.7683(13) 0.5706(11) 0.147 Uiso 1 calc R .
K5 K 0.5956(3) 0.21571(14) 0.61655(13) 0.045 Uani 1 d . .
N500 N 0.6356(10) 0.1147(5) 0.6362(5) 0.044 Uani 1 d U .
C501 C 0.7154(14) 0.1268(9) 0.6737(8) 0.070 Uani 1 d U .
H50A H 0.7351(14) 0.0908(9) 0.6725(8) 0.084 Uiso 1 calc R .
H50B H 0.7049(14) 0.1460(9) 0.7069(8) 0.084 Uiso 1 calc R .
C502 C 0.7865(15) 0.1629(9) 0.6683(8) 0.079 Uani 1 d U .
H50C H 0.8386(15) 0.1696(9) 0.6956(8) 0.095 Uiso 1 calc R .
H50D H 0.8005(15) 0.1432(9) 0.6362(8) 0.095 Uiso 1 calc R .
O503 O 0.7608(9) 0.2140(5) 0.6701(5) 0.064 Uani 1 d U .
C504 C 0.8302(16) 0.2460(9) 0.6646(9) 0.080 Uani 1 d U .
H50E H 0.8408(16) 0.2267(9) 0.6315(9) 0.096 Uiso 1 calc R .
H50F H 0.8832(16) 0.2497(9) 0.6904(9) 0.096 Uiso 1 calc R .
C505 C 0.8070(17) 0.3013(10) 0.6700(9) 0.086 Uani 1 d U .
H50G H 0.7966(17) 0.3197(10) 0.7033(9) 0.104 Uiso 1 calc R .
H50H H 0.8559(17) 0.3245(10) 0.6683(9) 0.104 Uiso 1 calc R .
O506 O 0.7335(10) 0.3000(5) 0.6333(5) 0.075 Uani 1 d U .
C507 C 0.7089(17) 0.3519(10) 0.6385(9) 0.093 Uani 1 d U .
H50I H 0.7580(17) 0.3780(10) 0.6408(9) 0.112 Uiso 1 calc R .
H50J H 0.6898(17) 0.3678(10) 0.6695(9) 0.112 Uiso 1 calc R .
C508 C 0.6410(18) 0.3455(11) 0.5967(10) 0.102 Uani 1 d U .
H50K H 0.6579(18) 0.3238(11) 0.5660(10) 0.123 Uiso 1 calc R .
H50L H 0.6328(18) 0.3831(11) 0.5967(10) 0.123 Uiso 1 calc R .
N509 N 0.5578(13) 0.3167(7) 0.5952(8) 0.083 Uani 1 d U .
C510 C 0.4945(17) 0.2966(10) 0.5441(9) 0.093 Uani 1 d U .
H51A H 0.4874(17) 0.3287(10) 0.5337(9) 0.112 Uiso 1 calc R .
H51B H 0.4382(17) 0.2827(10) 0.5464(9) 0.112 Uiso 1 calc R .
C511 C 0.5236(17) 0.2504(10) 0.5053(9) 0.091 Uani 1 d U .
H51C H 0.4860(17) 0.2424(10) 0.4717(9) 0.109 Uiso 1 calc R .
H51D H 0.5830(17) 0.2621(10) 0.5055(9) 0.109 Uiso 1 calc R .
O512 O 0.5197(10) 0.2023(6) 0.5166(5) 0.070 Uani 1 d U .
C513 C 0.5323(15) 0.1511(8) 0.4767(8) 0.074 Uani 1 d U .
H51E H 0.4916(15) 0.1453(8) 0.4445(8) 0.089 Uiso 1 calc R .
H51F H 0.5913(15) 0.1550(8) 0.4729(8) 0.089 Uiso 1 calc R .
C514 C 0.5178(14) 0.1049(8) 0.4905(7) 0.066 Uani 1 d U .
H51G H 0.4612(14) 0.1037(8) 0.4979(7) 0.080 Uiso 1 calc R .
H51P H 0.5183(14) 0.0692(8) 0.4628(7) 0.080 Uiso 1 calc R .
O515 O 0.5823(9) 0.1111(4) 0.5326(4) 0.053 Uani 1 d U .
C516 C 0.5779(13) 0.0633(8) 0.5461(7) 0.059 Uani 1 d U .
H51H H 0.5208(13) 0.0569(8) 0.5516(7) 0.071 Uiso 1 calc R .
H51I H 0.5841(13) 0.0296(8) 0.5181(7) 0.071 Uiso 1 calc R .
C517 C 0.6431(14) 0.0699(8) 0.5905(7) 0.060 Uani 1 d U .
H51J H 0.6999(14) 0.0777(8) 0.5853(7) 0.073 Uiso 1 calc R .
H51K H 0.6406(14) 0.0340(8) 0.5953(7) 0.073 Uiso 1 calc R .
C518 C 0.5669(15) 0.0969(9) 0.6517(8) 0.075 Uani 1 d U .
H51L H 0.5835(15) 0.0673(9) 0.6641(8) 0.090 Uiso 1 calc R .
H51M H 0.5171(15) 0.0799(9) 0.6224(8) 0.090 Uiso 1 calc R .
C519 C 0.5396(15) 0.1429(9) 0.6919(8) 0.072 Uani 1 d U .
H51N H 0.4985(15) 0.1264(9) 0.7048(8) 0.086 Uiso 1 calc R .
H51O H 0.5900(15) 0.1640(9) 0.7199(8) 0.086 Uiso 1 calc R .
O520 O 0.5011(9) 0.1789(5) 0.6706(5) 0.062 Uani 1 d U .
C521 C 0.4726(16) 0.2248(9) 0.7065(8) 0.077 Uani 1 d U .
H52A H 0.4311(16) 0.2097(9) 0.7201(8) 0.092 Uiso 1 calc R .
H52B H 0.5221(16) 0.2475(9) 0.7345(8) 0.092 Uiso 1 calc R .
C522 C 0.4331(15) 0.2594(9) 0.6821(8) 0.075 Uani 1 d U .
H52C H 0.3862(15) 0.2357(9) 0.6529(8) 0.090 Uiso 1 calc R .
H52D H 0.4075(15) 0.2880(9) 0.7053(8) 0.090 Uiso 1 calc R .
O523 O 0.4895(9) 0.2858(6) 0.6668(6) 0.074 Uani 1 d U .
C524 C 0.4523(17) 0.3216(10) 0.6440(9) 0.093 Uani 1 d U .
H52E H 0.4248(17) 0.3489(10) 0.6671(9) 0.111 Uiso 1 calc R .
H52F H 0.4073(17) 0.2988(10) 0.6134(9) 0.111 Uiso 1 calc R .
C525 C 0.5131(18) 0.3508(11) 0.6318(10) 0.101 Uani 1 d U .
H52G H 0.5570(18) 0.3739(11) 0.6628(10) 0.121 Uiso 1 calc R .
H52H H 0.4842(18) 0.3771(11) 0.6185(10) 0.121 Uiso 1 calc R .
K6 K 0.1227(3) 1.0056(2) 0.62045(14) 0.047 Uani 1 d . .
N600 N 0.2828(10) 0.9905(6) 0.5870(6) 0.053 Uani 1 d U .
C601 C 0.3513(14) 0.9904(8) 0.6279(7) 0.064 Uani 1 d U .
H60A H 0.3703(14) 1.0297(8) 0.6518(7) 0.077 Uiso 1 calc R .
H60B H 0.4003(14) 0.9770(8) 0.6143(7) 0.077 Uiso 1 calc R .
O603 O 0.2604(8) 0.9733(5) 0.6755(5) 0.056 Uani 1 d U .
C602 C 0.3321(15) 0.9558(9) 0.6563(8) 0.072 Uani 1 d U .
H60C H 0.3191(15) 0.9155(9) 0.6340(8) 0.086 Uiso 1 calc R .
H60D H 0.3825(15) 0.9609(9) 0.6841(8) 0.086 Uiso 1 calc R .
C604 C 0.2406(13) 0.9448(7) 0.7066(6) 0.052 Uani 1 d U .
H60E H 0.2221(13) 0.9042(7) 0.6860(6) 0.062 Uiso 1 calc R .
H60F H 0.2929(13) 0.9485(7) 0.7328(6) 0.062 Uiso 1 calc R .
C605 C 0.1747(13) 0.9672(8) 0.7297(7) 0.063 Uani 1 d U .
H60G H 0.1940(13) 1.0072(8) 0.7520(7) 0.076 Uiso 1 calc R .
H60H H 0.1621(13) 0.9463(8) 0.7499(7) 0.076 Uiso 1 calc R .
O606 O 0.0970(9) 0.9623(5) 0.6908(4) 0.058 Uani 1 d U .
C607 C 0.0299(15) 0.9768(10) 0.7116(8) 0.081 Uani 1 d U .
H60I H 0.0471(15) 1.0144(10) 0.7390(8) 0.097 Uiso 1 calc R .
H60J H 0.0164(15) 0.9495(10) 0.7261(8) 0.097 Uiso 1 calc R .
C608 C -0.0512(14) 0.9780(8) 0.6737(7) 0.069 Uani 1 d U .
H60K H -0.0704(14) 0.9399(8) 0.6473(7) 0.082 Uiso 1 calc R .
H60L H -0.0974(14) 0.9883(8) 0.6907(7) 0.082 Uiso 1 calc R .
N609 N -0.0378(11) 1.0185(7) 0.6500(7) 0.067 Uani 1 d U .
C610 C -0.0251(16) 1.0766(9) 0.6899(8) 0.085 Uani 1 d U .
H61A H 0.0197(16) 1.0787(9) 0.7194(8) 0.102 Uiso 1 calc R .
H61B H -0.0790(16) 1.0833(9) 0.7001(8) 0.102 Uiso 1 calc R .
C611 C 0.0013(15) 1.1235(9) 0.6729(8) 0.077 Uani 1 d U .
H61C H -0.0402(15) 1.1209(9) 0.6420(8) 0.092 Uiso 1 calc R .
H61D H 0.0047(15) 1.1612(9) 0.6991(8) 0.092 Uiso 1 calc R .
O612 O 0.0835(9) 1.1137(5) 0.6644(5) 0.065 Uani 1 d U .
C613 C 0.1160(14) 1.1548(8) 0.6479(7) 0.063 Uani 1 d U .
H61E H 0.1144(14) 1.1930(8) 0.6718(7) 0.076 Uiso 1 calc R .
H61O H 0.0784(14) 1.1500(8) 0.6151(7) 0.076 Uiso 1 calc R .
C614 C 0.2036(14) 1.1497(8) 0.6434(7) 0.066 Uani 1 d U .
H61F H 0.2222(14) 1.1777(8) 0.6309(7) 0.079 Uiso 1 calc R .
H61P H 0.2421(14) 1.1582(8) 0.6768(7) 0.079 Uiso 1 calc R .
O615 O 0.2108(8) 1.0976(5) 0.6122(4) 0.056 Uani 1 d U .
C616 C 0.2952(15) 1.0946(9) 0.6069(8) 0.072 Uani 1 d U .
H61G H 0.3354(15) 1.1026(9) 0.6397(8) 0.087 Uiso 1 calc R .
H61H H 0.3117(15) 1.1234(9) 0.5946(8) 0.087 Uiso 1 calc R .
C617 C 0.3014(14) 1.0370(7) 0.5708(7) 0.061 Uani 1 d U .
H61I H 0.2609(14) 1.0296(7) 0.5382(7) 0.073 Uiso 1 calc R .
H61J H 0.3599(14) 1.0369(7) 0.5658(7) 0.073 Uiso 1 calc R .
C618 C 0.2688(14) 0.9358(8) 0.5463(7) 0.070 Uani 1 d U .
H61K H 0.2691(14) 0.9067(8) 0.5606(7) 0.084 Uiso 1 calc R .
H61L H 0.3182(14) 0.9332(8) 0.5315(7) 0.084 Uiso 1 calc R .
C619 C 0.1868(15) 0.9212(9) 0.5042(8) 0.075 Uani 1 d U .
H61M H 0.1872(15) 0.9477(9) 0.4872(8) 0.090 Uiso 1 calc R .
H61N H 0.1839(15) 0.8827(9) 0.4793(8) 0.090 Uiso 1 calc R .
O620 O 0.1154(9) 0.9244(5) 0.5237(5) 0.065 Uani 1 d U .
C621 C 0.0394(15) 0.9173(9) 0.4870(8) 0.076 Uani 1 d U .
H62A H 0.0362(15) 0.8826(9) 0.4574(8) 0.091 Uiso 1 calc R .
H62B H 0.0393(15) 0.9495(9) 0.4765(8) 0.091 Uiso 1 calc R .
C622 C -0.0334(17) 0.9134(10) 0.5061(9) 0.096 Uani 1 d U .
H62C H -0.0860(17) 0.9061(10) 0.4790(9) 0.115 Uiso 1 calc R .
H62D H -0.0327(17) 0.8808(10) 0.5160(9) 0.115 Uiso 1 calc R .
O623 O -0.0371(9) 0.9612(6) 0.5467(5) 0.071 Uani 1 d U .
C624 C -0.1103(17) 0.9570(10) 0.5628(9) 0.095 Uani 1 d U .
H62E H -0.1148(17) 0.9224(10) 0.5696(9) 0.113 Uiso 1 calc R .
H62F H -0.1612(17) 0.9540(10) 0.5360(9) 0.113 Uiso 1 calc R .
C625 C -0.1093(16) 1.0051(10) 0.6073(8) 0.086 Uani 1 d U .
H62G H -0.1126(16) 1.0384(10) 0.5984(8) 0.103 Uiso 1 calc R .
H62H H -0.1621(16) 0.9991(10) 0.6174(8) 0.103 Uiso 1 calc R .
K7 K 0.2573(3) 0.1315(2) 0.88981(14) 0.054 Uani 1 d G .
N700 N 0.1562(16) 0.2137(8) 0.8611(7) 0.128 Uani 1 d GU .
C701 C 0.1654(20) 0.2662(7) 0.9074(9) 0.139 Uiso 1 d G .
H70A H 0.1688(20) 0.2996(7) 0.8987(14) 0.167 Uiso 1 calc R .
H70F H 0.1140(29) 0.2653(14) 0.9201(14) 0.167 Uiso 1 calc R .
C702 C 0.2437(22) 0.2712(14) 0.9474(12) 0.135 Uiso 1 d . .
H70B H 0.2925(22) 0.2770(14) 0.9340(12) 0.162 Uiso 1 calc R .
H70G H 0.2446(22) 0.3073(14) 0.9751(12) 0.162 Uiso 1 calc R .
O703 O 0.2640(20) 0.2384(13) 0.9678(11) 0.198 Uiso 1 d . .
C704 C 0.3458(22) 0.2530(13) 1.0088(12) 0.130 Uiso 1 d . .
H70C H 0.3389(22) 0.2789(13) 1.0413(12) 0.156 Uiso 1 calc R .
H70D H 0.3944(22) 0.2692(13) 1.0007(12) 0.156 Uiso 1 calc R .
C705 C 0.3542(31) 0.2011(20) 1.0079(17) 0.209 Uiso 1 d . .
H70H H 0.3875(31) 0.2086(20) 1.0423(17) 0.250 Uiso 1 calc R .
H70I H 0.2954(31) 0.1861(20) 1.0060(17) 0.250 Uiso 1 calc R .
O706 O 0.3786(16) 0.1624(10) 0.9848(8) 0.141 Uiso 1 d . .
C707 C 0.3934(26) 0.1089(16) 0.9964(14) 0.164 Uiso 1 d . .
H70E H 0.3414(26) 0.0916(16) 1.0008(14) 0.197 Uiso 1 calc R .
H70J H 0.4422(26) 0.1163(16) 1.0257(14) 0.197 Uiso 1 calc R .
C708 C 0.4126(30) 0.0761(20) 0.9501(17) 0.204 Uiso 1 d . .
H70K H 0.4309(30) 0.1020(20) 0.9354(17) 0.245 Uiso 1 calc R .
H70L H 0.4613(30) 0.0562(20) 0.9574(17) 0.245 Uiso 1 calc R .
N709 N 0.3438(26) 0.0364(16) 0.9147(14) 0.183 Uani 1 d U .
C710 C 0.3833(33) 0.0030(21) 0.8669(18) 0.231 Uiso 1 d . .
H71A H 0.4257(33) -0.0203(21) 0.8758(18) 0.277 Uiso 1 calc R .
H71O H 0.3370(33) -0.0217(21) 0.8378(18) 0.277 Uiso 1 calc R .
C711 C 0.4263(27) 0.0488(18) 0.8546(15) 0.176 Uiso 1 d . .
H71B H 0.4651(27) 0.0757(18) 0.8862(15) 0.211 Uiso 1 calc R .
H71P H 0.4631(27) 0.0304(18) 0.8328(15) 0.211 Uiso 1 calc R .
O712 O 0.3812(25) 0.0788(16) 0.8336(14) 0.241 Uiso 1 d . .
C713 C 0.3784(20) 0.0964(13) 0.7994(11) 0.111 Uiso 1 d . .
H71Q H 0.3672(20) 0.0616(13) 0.7689(11) 0.134 Uiso 1 calc R .
H71R H 0.4384(20) 0.1125(13) 0.8051(11) 0.134 Uiso 1 calc R .
C714 C 0.3350(30) 0.1296(19) 0.7855(16) 0.193 Uiso 1 d . .
H71S H 0.3765(30) 0.1572(19) 0.7829(16) 0.231 Uiso 1 calc R .
H71T H 0.3002(30) 0.1072(19) 0.7511(16) 0.231 Uiso 1 calc R .
O715 O 0.2850(18) 0.1575(11) 0.8084(9) 0.155 Uiso 1 d . .
C716 C 0.2324(23) 0.1930(14) 0.7961(12) 0.138 Uiso 1 d . .
H71C H 0.1786(23) 0.1697(14) 0.7726(12) 0.165 Uiso 1 calc R .
H71D H 0.2602(23) 0.2106(14) 0.7778(12) 0.165 Uiso 1 calc R .
C717 C 0.2073(34) 0.2419(22) 0.8393(19) 0.248 Uiso 1 d . .
H71E H 0.1735(34) 0.2662(22) 0.8258(19) 0.298 Uiso 1 calc R .
H71F H 0.2594(34) 0.2653(22) 0.8648(19) 0.298 Uiso 1 calc R .
C718 C 0.0813(23) 0.1890(14) 0.8377(13) 0.141 Uiso 1 d . .
H71G H 0.0815(23) 0.1750(14) 0.8021(13) 0.169 Uiso 1 calc R .
H71H H 0.0450(23) 0.2193(14) 0.8426(13) 0.169 Uiso 1 calc R .
C719 C 0.0306(26) 0.1413(16) 0.8429(15) 0.170 Uiso 1 d . .
H71I H -0.0001(26) 0.1582(16) 0.8688(15) 0.204 Uiso 1 calc R .
H71J H -0.0134(26) 0.1213(16) 0.8111(15) 0.204 Uiso 1 calc R .
O720 O 0.0723(15) 0.1039(10) 0.8543(8) 0.132 Uiso 1 d . .
C721 C 0.0412(21) 0.0654(13) 0.8607(12) 0.121 Uiso 1 d . .
H72A H -0.0136(21) 0.0512(13) 0.8346(12) 0.145 Uiso 1 calc R .
H72B H 0.0255(21) 0.0826(13) 0.8926(12) 0.145 Uiso 1 calc R .
C722 C 0.0718(33) 0.0207(21) 0.8623(18) 0.235 Uiso 1 d . .
H72C H 0.0368(33) 0.0024(21) 0.8772(18) 0.282 Uiso 1 calc R .
H72F H 0.0678(33) -0.0061(21) 0.8280(18) 0.282 Uiso 1 calc R .
O723 O 0.1635(13) 0.0336(7) 0.8923(6) 0.102 Uiso 1 d . .
C724 C 0.2071(30) -0.0011(19) 0.8950(17) 0.196 Uiso 1 d . .
H72D H 0.2091(30) -0.0232(19) 0.8604(17) 0.235 Uiso 1 calc R .
H72E H 0.1740(30) -0.0266(19) 0.9048(17) 0.235 Uiso 1 calc R .
C725 C 0.2897(28) 0.0074(18) 0.9236(16) 0.178 Uiso 1 d . .
H72G H 0.2898(28) 0.0260(18) 0.9591(16) 0.214 Uiso 1 calc R .
H72H H 0.3085(28) -0.0297(18) 0.9188(16) 0.214 Uiso 1 calc R .
K801 K 0.6968(3) 0.3213(2) 0.89028(14) 0.075 Uani 0.50 d PG .
N800 N 0.8321(5) 0.3388(4) 0.8436(3) 0.177 Uiso 0.50 d PG .
C801 C 0.9153(4) 0.3701(5) 0.8842(4) 0.254 Uiso 0.50 d PG .
H80A H 0.9542(5) 0.3831(6) 0.8692(5) 0.305 Uiso 0.50 d PG .
H80I H 0.9423(3) 0.3453(5) 0.8984(5) 0.305 Uiso 0.50 d PG .
C802 C 0.8967(5) 0.4187(4) 0.9240(4) 0.254 Uiso 0.50 d PG .
H80B H 0.8619(6) 0.4405(4) 0.9096(4) 0.305 Uiso 0.50 d PG .
H80J H 0.9485(5) 0.4425(5) 0.9461(5) 0.305 Uiso 0.50 d PG .
O803 O 0.8509(4) 0.3996(3) 0.9524(3) 0.191 Uiso 0.50 d PG .
C804 C 0.8411(6) 0.4437(3) 0.9910(3) 0.254 Uiso 0.50 d PG .
H80C H 0.8095(7) 0.4695(3) 0.9805(3) 0.305 Uiso 0.50 d PG .
H80D H 0.8968(7) 0.4634(4) 1.0111(4) 0.305 Uiso 0.50 d PG .
C805 C 0.7936(7) 0.4204(4) 1.0233(2) 0.254 Uiso 0.50 d PG .
H80E H 0.7891(9) 0.4513(4) 1.0524(2) 0.305 Uiso 0.50 d PG .
H80K H 0.8234(8) 0.3938(5) 1.0336(2) 0.305 Uiso 0.50 d PG .
O806 O 0.7097(6) 0.3942(3) 0.9899(2) 0.191 Uiso 0.50 d PG .
C807 C 0.6554(8) 0.3770(5) 1.0157(2) 0.254 Uiso 0.50 d PG .
H80F H 0.6554(9) 0.4082(6) 1.0456(3) 0.305 Uiso 0.50 d PG .
H80G H 0.6784(9) 0.3477(5) 1.0251(2) 0.305 Uiso 0.50 d PG .
C808 C 0.5706(7) 0.3550(5) 0.9842(4) 0.254 Uiso 0.50 d PG .
H80H H 0.5481(7) 0.3846(5) 0.9753(4) 0.305 Uiso 0.50 d PG .
H80L H 0.5365(8) 0.3464(6) 1.0039(4) 0.305 Uiso 0.50 d PG .
N809 N 0.5626(5) 0.3087(5) 0.9404(4) 0.177 Uiso 0.50 d PG .
C810 C 0.4784(5) 0.2987(5) 0.9064(5) 0.254 Uiso 0.50 d PG .
H81A H 0.4345(5) 0.3009(7) 0.9237(6) 0.305 Uiso 0.50 d PG .
H81B H 0.4701(5) 0.2612(5) 0.8816(5) 0.305 Uiso 0.50 d PG .
C811 C 0.4672(3) 0.3385(5) 0.8777(4) 0.254 Uiso 0.50 d PG .
H81C H 0.4807(5) 0.3765(5) 0.9018(5) 0.305 Uiso 0.50 d PG .
H81D H 0.4093(3) 0.3329(7) 0.8581(5) 0.305 Uiso 0.50 d PG .
O812 O 0.5267(3) 0.3288(4) 0.8479(3) 0.191 Uiso 0.50 d PG .
C813 C 0.5085(5) 0.3627(5) 0.8171(4) 0.254 Uiso 0.50 d PG .
H81E H 0.5241(6) 0.4014(5) 0.8394(4) 0.305 Uiso 0.50 d PG .
H81F H 0.4499(6) 0.3570(6) 0.7985(5) 0.305 Uiso 0.50 d PG .
C814 C 0.5729(7) 0.3490(5) 0.7841(3) 0.254 Uiso 0.50 d PG .
H81G H 0.5640(8) 0.3690(6) 0.7622(3) 0.305 Uiso 0.50 d PG .
H81M H 0.5607(7) 0.3095(5) 0.7641(2) 0.305 Uiso 0.50 d PG .
O815 O 0.6575(6) 0.3628(4) 0.8117(2) 0.191 Uiso 0.50 d PG .
C816 C 0.7165(8) 0.3541(5) 0.7817(3) 0.254 Uiso 0.50 d PG .
H81H H 0.7047(9) 0.3733(6) 0.7593(3) 0.305 Uiso 0.50 d PG .
H81N H 0.7088(8) 0.3145(5) 0.7621(2) 0.305 Uiso 0.50 d PG .
C817 C 0.8040(7) 0.3711(5) 0.8114(3) 0.254 Uiso 0.50 d PG .
H81I H 0.8410(8) 0.3670(6) 0.7897(4) 0.305 Uiso 0.50 d PG .
H81O H 0.8100(7) 0.4103(4) 0.8320(4) 0.305 Uiso 0.50 d PG .
C818 C 0.8544(7) 0.2822(5) 0.8117(4) 0.254 Uiso 0.50 d PG .
H81J H 0.9076(7) 0.2876(6) 0.8037(5) 0.305 Uiso 0.50 d PG .
H81K H 0.8101(8) 0.2667(5) 0.7811(3) 0.305 Uiso 0.50 d PG .
C819 C 0.8579(6) 0.2421(4) 0.8373(4) 0.254 Uiso 0.50 d PG .
H81L H 0.9010(6) 0.2578(5) 0.8684(5) 0.305 Uiso 0.50 d PG .
H81P H 0.8731(8) 0.2074(5) 0.8170(5) 0.305 Uiso 0.50 d PG .
O820 O 0.7795(6) 0.2304(3) 0.8468(3) 0.191 Uiso 0.50 d PG .
C821 C 0.7773(8) 0.1874(3) 0.8649(4) 0.254 Uiso 0.50 d PG .
H82A H 0.8191(8) 0.1973(4) 0.8962(5) 0.305 Uiso 0.50 d PG .
H82B H 0.7914(10) 0.1549(3) 0.8410(5) 0.305 Uiso 0.50 d PG .
C822 C 0.6826(9) 0.1730(2) 0.8693(4) 0.254 Uiso 0.50 d PG .
H82C H 0.6811(10) 0.1430(3) 0.8810(5) 0.305 Uiso 0.50 d PG .
H82F H 0.6401(9) 0.1622(2) 0.8382(4) 0.305 Uiso 0.50 d PG .
O823 O 0.6703(7) 0.2217(3) 0.9048(4) 0.191 Uiso 0.50 d PG .
C824 C 0.5852(8) 0.2063(4) 0.9128(5) 0.254 Uiso 0.50 d PG .
H82D H 0.5863(10) 0.1750(4) 0.9230(5) 0.305 Uiso 0.50 d PG .
H82E H 0.5402(7) 0.1967(4) 0.8829(5) 0.305 Uiso 0.50 d PG .
C825 C 0.5704(8) 0.2592(5) 0.9556(4) 0.254 Uiso 0.50 d PG .
H82G H 0.5198(9) 0.2510(6) 0.9648(5) 0.305 Uiso 0.50 d PG .
H82H H 0.6180(9) 0.2689(5) 0.9842(4) 0.305 Uiso 0.50 d PG .
K802 K 0.7028(3) 0.3423(2) 0.89178(14) 0.054 Uani 0.50 d PG .
N840 N 0.8451(5) 0.3304(4) 0.8425(3) 0.069 Uiso 0.50 d PG .
C841 C 0.8702(6) 0.2726(5) 0.8306(4) 0.132 Uiso 0.50 d PG .
H84A H 0.9074(5) 0.2719(5) 0.8602(5) 0.158 Uiso 0.50 d PG .
H84B H 0.9017(7) 0.2650(6) 0.8057(5) 0.158 Uiso 0.50 d PG .
C842 C 0.7937(7) 0.2276(4) 0.8144(3) 0.132 Uiso 0.50 d PG .
H84I H 0.8115(9) 0.1911(4) 0.8031(4) 0.158 Uiso 0.50 d PG .
H84J H 0.7519(7) 0.2306(4) 0.7874(3) 0.158 Uiso 0.50 d PG .
O843 O 0.7571(6) 0.2350(2) 0.8537(3) 0.140 Uiso 0.50 d PG .
C844 C 0.6955(8) 0.1868(2) 0.8418(4) 0.132 Uiso 0.50 d PG .
H84K H 0.7231(9) 0.1544(2) 0.8403(5) 0.158 Uiso 0.50 d PG .
H84L H 0.6556(8) 0.1783(2) 0.8101(4) 0.158 Uiso 0.50 d PG .
C845 C 0.6508(7) 0.2017(2) 0.8828(4) 0.132 Uiso 0.50 d PG .
H84C H 0.6912(8) 0.2125(3) 0.9147(4) 0.158 Uiso 0.50 d PG .
H84D H 0.6120(9) 0.1696(3) 0.8779(5) 0.158 Uiso 0.50 d PG .
O846 O 0.6054(5) 0.2461(3) 0.8839(3) 0.140 Uiso 0.50 d PG .
C847 C 0.5547(6) 0.2519(4) 0.9173(4) 0.132 Uiso 0.50 d PG .
H84E H 0.5884(7) 0.2626(5) 0.9510(4) 0.158 Uiso 0.50 d PG .
H84F H 0.5192(7) 0.2167(5) 0.9076(5) 0.158 Uiso 0.50 d PG .
C848 C 0.4994(5) 0.2952(5) 0.9148(4) 0.132 Uiso 0.50 d PG .
H84G H 0.4540(6) 0.2946(6) 0.9306(5) 0.158 Uiso 0.50 d PG .
H84H H 0.4740(4) 0.2871(5) 0.8802(4) 0.158 Uiso 0.50 d PG .
N849 N 0.5555(5) 0.3547(4) 0.9367(3) 0.069 Uiso 0.50 d PG .
C850 C 0.5022(5) 0.3938(5) 0.9236(4) 0.132 Uiso 0.50 d PG .
H85M H 0.5319(7) 0.4314(5) 0.9421(4) 0.158 Uiso 0.50 d PG .
H85N H 0.4486(6) 0.3916(6) 0.9320(5) 0.158 Uiso 0.50 d PG .
C851 C 0.4843(5) 0.3844(5) 0.8683(4) 0.132 Uiso 0.50 d PG .
H85O H 0.4459(6) 0.4081(6) 0.8591(5) 0.158 Uiso 0.50 d PG .
H85P H 0.4588(4) 0.3459(6) 0.8496(5) 0.158 Uiso 0.50 d PG .
O852 O 0.5641(5) 0.3903(4) 0.8559(3) 0.140 Uiso 0.50 d PG .
C853 C 0.5531(7) 0.3875(5) 0.8089(4) 0.132 Uiso 0.50 d PG .
H85K H 0.5139(8) 0.4131(6) 0.8047(4) 0.158 Uiso 0.50 d PG .
H85L H 0.5271(6) 0.3503(5) 0.7856(3) 0.158 Uiso 0.50 d PG .
C854 C 0.6247(8) 0.4033(5) 0.8012(3) 0.132 Uiso 0.50 d PG .
H85I H 0.6428(9) 0.4430(4) 0.8189(4) 0.158 Uiso 0.50 d PG .
H85J H 0.6125(9) 0.3958(6) 0.7662(4) 0.158 Uiso 0.50 d PG .
O855 O 0.6901(7) 0.3775(4) 0.8114(3) 0.140 Uiso 0.50 d PG .
C856 C 0.7700(8) 0.3905(5) 0.8042(4) 0.132 Uiso 0.50 d PG .
H85G H 0.8028(8) 0.4234(5) 0.8315(4) 0.158 Uiso 0.50 d PG .
H85H H 0.7588(10) 0.3987(6) 0.7747(4) 0.158 Uiso 0.50 d PG .
C857 C 0.8176(7) 0.3385(5) 0.7952(3) 0.132 Uiso 0.50 d PG .
H85E H 0.7842(8) 0.3052(5) 0.7688(3) 0.158 Uiso 0.50 d PG .
H85F H 0.8688(8) 0.3467(6) 0.7864(4) 0.158 Uiso 0.50 d PG .
C858 C 0.9169(4) 0.3709(5) 0.8781(4) 0.132 Uiso 0.50 d PG .
H85A H 0.9099(6) 0.4072(5) 0.8771(5) 0.158 Uiso 0.50 d PG .
H85B H 0.9683(5) 0.3605(6) 0.8684(5) 0.158 Uiso 0.50 d PG .
C859 C 0.9285(3) 0.3755(5) 0.9297(4) 0.132 Uiso 0.50 d PG .
H85C H 0.9826(4) 0.3971(6) 0.9507(5) 0.158 Uiso 0.50 d PG .
H85D H 0.9274(3) 0.3384(5) 0.9299(4) 0.158 Uiso 0.50 d PG .
O860 O 0.8615(4) 0.3995(3) 0.9493(3) 0.140 Uiso 0.50 d PG .
C861 C 0.8806(6) 0.4167(4) 1.0029(3) 0.132 Uiso 0.50 d PG .
H86A H 0.9325(6) 0.4429(5) 1.0189(4) 0.158 Uiso 0.50 d PG .
H86B H 0.8873(6) 0.3845(5) 1.0115(3) 0.158 Uiso 0.50 d PG .
C862 C 0.8054(7) 0.4416(4) 1.0163(2) 0.132 Uiso 0.50 d PG .
H86C H 0.7949(8) 0.4712(3) 1.0045(3) 0.158 Uiso 0.50 d PG .
H86D H 0.8158(9) 0.4568(4) 1.0519(2) 0.158 Uiso 0.50 d PG .
O863 O 0.7315(6) 0.4004(3) 0.9977(2) 0.140 Uiso 0.50 d PG .
C864 C 0.6584(8) 0.4241(4) 1.0138(3) 0.132 Uiso 0.50 d PG .
H86G H 0.6456(8) 0.4540(4) 1.0028(3) 0.158 Uiso 0.50 d PG .
H86H H 0.6719(10) 0.4385(5) 1.0496(3) 0.158 Uiso 0.50 d PG .
C865 C 0.5880(7) 0.3761(5) 0.9909(3) 0.132 Uiso 0.50 d PG .
H86E H 0.6069(8) 0.3453(5) 0.9992(3) 0.158 Uiso 0.50 d PG .
H86F H 0.5415(8) 0.3874(6) 1.0057(4) 0.158 Uiso 0.50 d PG .
N900 N -0.2199(17) 0.8423(11) 0.5740(9) 0.134 Uiso 1 d . .
H90E H -0.1833(17) 0.8712(11) 0.5765(9) 0.160 Uiso 1 d R .
H90F H -0.2132(17) 0.8302(11) 0.5992(9) 0.160 Uiso 1 d R .
C901 C -0.2841(23) 0.8176(14) 0.5344(12) 0.144 Uiso 1 d . .
H90A H -0.3363(23) 0.8200(14) 0.5447(12) 0.173 Uiso 1 d R .
H90B H -0.2782(23) 0.7785(14) 0.5211(12) 0.173 Uiso 1 d R .
C902 C -0.3041(24) 0.8376(15) 0.4915(13) 0.150 Uiso 1 d . .
H90C H -0.3007(24) 0.8778(15) 0.5036(13) 0.180 Uiso 1 d R .
H90D H -0.3586(24) 0.8209(15) 0.4680(13) 0.180 Uiso 1 d R .
N903 N -0.2402(19) 0.8175(12) 0.4665(11) 0.161 Uiso 1 d . .
H90G H -0.2024(19) 0.7987(12) 0.4790(11) 0.193 Uiso 1 d R .
H90H H -0.2350(19) 0.8249(12) 0.4400(11) 0.193 Uiso 1 d R .
N910 N -0.0523(23) 0.7480(14) 0.4409(12) 0.205 Uiso 1 d . .
H91A H -0.0705(23) 0.7246(14) 0.4539(12) 0.246 Uiso 1 d R .
H91B H -0.0856(23) 0.7728(14) 0.4347(12) 0.246 Uiso 1 d R .
C911 C 0.0347(26) 0.7500(16) 0.4280(14) 0.171 Uiso 1 d . .
H91C H 0.0734(26) 0.7843(16) 0.4471(14) 0.205 Uiso 1 d R .
H91D H 0.0305(26) 0.7396(16) 0.3931(14) 0.205 Uiso 1 d R .
C912 C 0.0501(26) 0.6994(16) 0.4482(14) 0.166 Uiso 1 d . .
H91E H 0.0107(26) 0.6655(16) 0.4286(14) 0.199 Uiso 1 d R .
H91F H 0.0511(26) 0.7099(16) 0.4827(14) 0.199 Uiso 1 d R .
N913 N 0.1408(25) 0.6955(16) 0.4389(13) 0.228 Uiso 1 d . .
H91G H 0.1647(25) 0.7176(16) 0.4264(13) 0.273 Uiso 1 d R .
H91H H 0.1696(25) 0.6697(16) 0.4465(13) 0.273 Uiso 1 d R .
 
loop_
  _atom_site_aniso_label
  _atom_site_aniso_U_11
  _atom_site_aniso_U_22
  _atom_site_aniso_U_33
  _atom_site_aniso_U_23
  _atom_site_aniso_U_13
  _atom_site_aniso_U_12
Sn11 0.065 0.062 0.057 0.032 0.026 0.008
Sn12 0.073 0.055 0.061 0.024 0.035 0.027
Sn13 0.078 0.073 0.033 0.017 0.002 -0.028
Sn14 0.042 0.071 0.060 0.040 0.016 0.016
Sn15 0.038 0.048 0.065 0.020 0.015 -0.001
Sn16 0.042 0.055 0.052 0.021 0.005 0.012
Sn17 0.088 0.035 0.039 0.009 0.021 0.005
Sn18 0.037 0.069 0.048 0.029 0.002 -0.006
Sn19 0.051 0.038 0.046 0.012 0.012 0.006
Mo1 0.047 0.037 0.037 0.010 0.009 0.005
C11 0.067 0.046 0.038 0.005 -0.022 0.010
O11 0.059 0.092 0.058 0.036 -0.003 0.013
C12 0.072 0.055 0.038 0.014 -0.006 -0.026
O12 0.074 0.064 0.049 0.013 0.015 -0.016
C13 0.039 0.043 0.061 0.007 -0.001 0.013
O13 0.078 0.069 0.061 0.009 0.014 0.026
Sn21 0.127 0.108 0.056 0.033 0.012 -0.046
Sn22 0.070 0.107 0.114 0.081 0.007 0.005
Sn23 0.096 0.088 0.054 0.018 0.015 -0.038
Sn24 0.090 0.067 0.087 0.015 0.054 0.015
Sn25 0.059 0.060 0.068 0.029 0.011 -0.010
Sn26 0.081 0.037 0.082 0.018 0.026 0.012
Sn27 0.047 0.059 0.072 0.032 0.020 0.007
Sn28 0.094 0.036 0.062 0.014 0.032 0.016
Sn29 0.061 0.060 0.061 0.027 0.011 0.009
Mo2 0.071 0.048 0.052 0.018 0.023 0.011
C21 0.052 0.052 0.052 0.020 0.013 0.008
O21 0.095 0.095 0.095 0.037 0.024 0.014
C22 0.083 0.083 0.083 0.032 0.021 0.012
O22 0.092 0.092 0.092 0.036 0.024 0.013
C23 0.079 0.079 0.079 0.031 0.021 0.012
O23 0.114 0.114 0.114 0.044 0.029 0.016
K1 0.046 0.030 0.033 0.005 0.011 0.008
N100 0.070 0.034 0.035 -0.005 0.017 -0.002
C101 0.067 0.067 0.067 0.026 0.017 0.010
C102 0.045 0.045 0.045 0.017 0.012 0.007
O103 0.034 0.047 0.028 0.001 0.003 0.005
C104 0.049 0.049 0.049 0.019 0.013 0.007
C105 0.046 0.046 0.046 0.018 0.012 0.007
O106 0.028 0.034 0.047 0.018 0.005 0.005
C107 0.046 0.046 0.046 0.018 0.012 0.007
C108 0.051 0.051 0.051 0.020 0.013 0.007
N109 0.060 0.036 0.058 0.007 0.029 -0.001
C110 0.060 0.060 0.060 0.023 0.015 0.009
C111 0.070 0.070 0.070 0.027 0.018 0.010
O112 0.113 0.033 0.051 0.010 0.035 0.010
C113 0.072 0.072 0.072 0.028 0.019 0.010
C114 0.072 0.072 0.072 0.028 0.019 0.010
O115 0.106 0.042 0.043 0.016 0.013 0.021
C116 0.071 0.071 0.071 0.027 0.018 0.010
C117 0.053 0.053 0.053 0.021 0.014 0.008
C118 0.062 0.062 0.062 0.024 0.016 0.009
C119 0.062 0.062 0.062 0.024 0.016 0.009
O120 0.050 0.050 0.064 0.000 0.019 0.006
C121 0.068 0.068 0.068 0.026 0.018 0.010
C122 0.071 0.071 0.071 0.027 0.018 0.010
O123 0.048 0.038 0.051 0.001 -0.001 -0.004
C124 0.055 0.055 0.055 0.021 0.014 0.008
C125 0.062 0.062 0.062 0.024 0.016 0.009
K2 0.043 0.037 0.032 0.005 0.009 0.006
N200 0.054 0.042 0.031 0.003 0.007 0.009
C201 0.055 0.055 0.055 0.021 0.014 0.008
C202 0.063 0.063 0.063 0.025 0.016 0.009
O203 0.048 0.045 0.057 0.014 0.015 0.011
C204 0.073 0.073 0.073 0.028 0.019 0.011
C205 0.078 0.078 0.078 0.030 0.020 0.011
O206 0.059 0.036 0.036 0.000 -0.005 -0.006
C207 0.074 0.074 0.074 0.029 0.019 0.011
C208 0.069 0.069 0.069 0.027 0.018 0.010
N209 0.079 0.066 0.041 0.009 0.020 0.008
C210 0.063 0.063 0.063 0.025 0.016 0.009
C211 0.060 0.060 0.060 0.023 0.016 0.009
O212 0.061 0.042 0.054 0.007 0.025 0.021
C213 0.062 0.062 0.062 0.024 0.016 0.009
C214 0.057 0.057 0.057 0.022 0.015 0.008
O215 0.045 0.051 0.043 0.000 0.010 0.001
C216 0.060 0.060 0.060 0.023 0.015 0.009
C217 0.058 0.058 0.058 0.023 0.015 0.008
C218 0.063 0.063 0.063 0.024 0.016 0.009
C219 0.066 0.066 0.066 0.026 0.017 0.010
O220 0.071 0.043 0.046 0.015 0.020 0.018
C221 0.057 0.057 0.057 0.022 0.015 0.008
C222 0.063 0.063 0.063 0.024 0.016 0.009
O223 0.078 0.072 0.055 0.018 0.028 0.016
C224 0.067 0.067 0.067 0.026 0.017 0.010
C225 0.065 0.065 0.065 0.025 0.017 0.009
K3 0.045 0.053 0.044 0.013 0.014 0.006
N300 0.040 0.053 0.057 0.013 0.015 -0.011
C301 0.045 0.045 0.045 0.017 0.012 0.007
C302 0.048 0.048 0.048 0.019 0.012 0.007
O303 0.044 0.059 0.047 0.010 0.023 -0.006
C304 0.053 0.053 0.053 0.020 0.014 0.008
C305 0.072 0.072 0.072 0.028 0.019 0.010
O306 0.075 0.074 0.052 0.007 0.024 0.026
C307 0.091 0.091 0.091 0.035 0.024 0.013
C308 0.094 0.094 0.094 0.036 0.024 0.014
N309 0.108 0.084 0.060 0.024 0.021 0.024
C310 0.100 0.100 0.100 0.039 0.026 0.014
C311 0.096 0.096 0.096 0.037 0.025 0.014
O312 0.111 0.095 0.164 0.087 0.088 0.042
C313 0.132 0.132 0.132 0.051 0.034 0.019
C314 0.153 0.153 0.153 0.059 0.040 0.022
O315 0.056 0.265 0.040 0.085 -0.017 -0.033
C316 0.069 0.069 0.069 0.027 0.018 0.010
C317 0.061 0.061 0.061 0.024 0.016 0.009
C318 0.065 0.065 0.065 0.025 0.017 0.009
C319 0.064 0.064 0.064 0.025 0.017 0.009
O320 0.077 0.044 0.068 0.021 0.031 -0.003
C321 0.056 0.056 0.056 0.022 0.014 0.008
C322 0.076 0.076 0.076 0.030 0.020 0.011
O323 0.063 0.076 0.067 0.042 0.002 0.011
C324 0.093 0.093 0.093 0.036 0.024 0.014
C325 0.111 0.111 0.111 0.043 0.029 0.016
K4 0.041 0.062 0.045 0.022 0.010 0.008
N400 0.038 0.066 0.041 -0.002 0.000 -0.002
C401 0.055 0.055 0.055 0.021 0.014 0.008
C402 0.056 0.056 0.056 0.022 0.015 0.008
O403 0.064 0.047 0.034 0.016 0.014 0.005
C404 0.058 0.058 0.058 0.023 0.015 0.008
C405 0.060 0.060 0.060 0.023 0.015 0.009
O406 0.070 0.097 0.050 0.039 0.012 0.036
C407 0.098 0.098 0.098 0.038 0.025 0.014
C408 0.113 0.113 0.113 0.044 0.029 0.016
N409 0.119 0.078 0.072 0.010 0.012 0.033
C410 0.163 0.163 0.163 0.063 0.042 0.024
C411 0.129 0.129 0.129 0.050 0.033 0.019
O412 0.035 0.090 0.077 0.016 -0.004 0.001
C413 0.071 0.071 0.071 0.027 0.018 0.010
C414 0.065 0.065 0.065 0.025 0.017 0.009
O415 0.049 0.043 0.050 0.004 0.007 -0.012
C416 0.068 0.068 0.068 0.026 0.018 0.010
C417 0.072 0.072 0.072 0.028 0.019 0.010
C418 0.070 0.070 0.070 0.027 0.018 0.010
C419 0.110 0.110 0.110 0.043 0.028 0.016
O420 0.078 0.170 0.067 0.032 0.010 -0.035
C421 0.074 0.074 0.074 0.029 0.019 0.011
C422 0.117 0.117 0.117 0.045 0.030 0.017
O423 0.142 0.092 0.088 0.054 0.051 0.021
C424 0.085 0.085 0.085 0.033 0.022 0.012
C425 0.122 0.122 0.122 0.047 0.032 0.018
K5 0.052 0.037 0.050 0.017 0.017 0.011
N500 0.050 0.044 0.042 0.020 0.014 0.004
C501 0.070 0.070 0.070 0.027 0.018 0.010
C502 0.079 0.079 0.079 0.031 0.020 0.011
O503 0.066 0.048 0.072 0.027 0.000 0.003
C504 0.080 0.080 0.080 0.031 0.021 0.012
C505 0.086 0.086 0.086 0.033 0.022 0.013
O506 0.073 0.034 0.103 0.028 -0.003 -0.007
C507 0.093 0.093 0.093 0.036 0.024 0.013
C508 0.102 0.102 0.102 0.040 0.026 0.015
N509 0.075 0.063 0.129 0.049 0.041 0.015
C510 0.093 0.093 0.093 0.036 0.024 0.014
C511 0.091 0.091 0.091 0.035 0.024 0.013
O512 0.090 0.072 0.059 0.038 0.013 0.029
C513 0.074 0.074 0.074 0.029 0.019 0.011
C514 0.066 0.066 0.066 0.026 0.017 0.010
O515 0.073 0.040 0.034 0.005 0.008 0.017
C516 0.059 0.059 0.059 0.023 0.015 0.009
C517 0.060 0.060 0.060 0.023 0.016 0.009
C518 0.075 0.075 0.075 0.029 0.019 0.011
C519 0.072 0.072 0.072 0.028 0.019 0.010
O520 0.064 0.054 0.063 0.008 0.032 0.004
C521 0.077 0.077 0.077 0.030 0.020 0.011
C522 0.075 0.075 0.075 0.029 0.019 0.011
O523 0.059 0.060 0.100 0.021 0.035 0.008
C524 0.093 0.093 0.093 0.036 0.024 0.013
C525 0.101 0.101 0.101 0.039 0.026 0.015
K6 0.037 0.051 0.061 0.032 0.012 0.004
N600 0.041 0.046 0.070 0.016 0.024 0.000
C601 0.064 0.064 0.064 0.025 0.017 0.009
O603 0.038 0.058 0.073 0.031 0.009 0.012
C602 0.072 0.072 0.072 0.028 0.019 0.010
C604 0.052 0.052 0.052 0.020 0.013 0.007
C605 0.063 0.063 0.063 0.025 0.016 0.009
O606 0.061 0.064 0.057 0.030 0.023 0.004
C607 0.081 0.081 0.081 0.031 0.021 0.012
C608 0.069 0.069 0.069 0.027 0.018 0.010
N609 0.048 0.062 0.117 0.053 0.036 0.015
C610 0.085 0.085 0.085 0.033 0.022 0.012
C611 0.077 0.077 0.077 0.030 0.020 0.011
O612 0.052 0.058 0.099 0.036 0.031 0.021
C613 0.063 0.063 0.063 0.024 0.016 0.009
C614 0.066 0.066 0.066 0.026 0.017 0.010
O615 0.039 0.060 0.067 0.026 0.010 -0.007
C616 0.072 0.072 0.072 0.028 0.019 0.010
C617 0.061 0.061 0.061 0.023 0.016 0.009
C618 0.070 0.070 0.070 0.027 0.018 0.010
C619 0.075 0.075 0.075 0.029 0.019 0.011
O620 0.049 0.059 0.066 0.021 -0.016 -0.008
C621 0.076 0.076 0.076 0.029 0.020 0.011
C622 0.096 0.096 0.096 0.037 0.025 0.014
O623 0.052 0.082 0.082 0.043 0.004 0.014
C624 0.095 0.095 0.095 0.037 0.024 0.014
C625 0.086 0.086 0.086 0.033 0.022 0.012
K7 0.041 0.071 0.049 0.017 0.023 0.011
N700 0.128 0.128 0.128 0.050 0.033 0.019
N709 0.183 0.183 0.183 0.071 0.047 0.026
K801 0.132 0.054 0.032 0.021 0.014 -0.033
K802 0.060 0.035 0.054 0.009 0.007 -0.014
 
_geom_special_details
;
  All esds (except the esd in the dihedral angle between two l.s. planes)
  are estimated using the full covariance matrix.  The cell esds are taken
  into account individually in the estimation of esds in distances, angles
  and torsion angles; correlations between esds in cell parameters are only
  used when they are defined by crystal symmetry.  An approximate (isotropic)
  treatment of cell esds is used for estimating esds involving l.s. planes.
;
 
loop_
  _geom_bond_atom_site_label_1
  _geom_bond_atom_site_label_2
  _geom_bond_distance
  _geom_bond_site_symmetry_2
  _geom_bond_publ_flag
Sn11 Sn13 2.919(2) . ?
Sn11 Sn15 2.954(2) . ?
Sn11 Sn14 2.958(2) . ?
Sn11 Sn12 2.959(2) . ?
Sn12 Sn17 2.976(2) . ?
Sn12 Sn16 2.978(2) . ?
Sn12 Sn15 3.170(2) . ?
Sn12 Sn13 3.187(3) . ?
Sn13 Sn17 2.950(2) . ?
Sn13 Sn18 2.961(2) . ?
Sn13 Sn14 3.283(2) . ?
Sn14 Sn19 2.939(2) . ?
Sn14 Sn18 2.946(2) . ?
Sn14 Sn15 3.137(2) . ?
Sn15 Sn19 2.995(2) . ?
Sn15 Sn16 2.998(2) . ?
Sn16 Mo1 3.028(2) . ?
Sn16 Sn19 3.029(2) . ?
Sn16 Sn17 3.064(2) . ?
Sn17 Mo1 2.976(2) . ?
Sn17 Sn18 3.096(2) . ?
Sn18 Mo1 2.984(2) . ?
Sn18 Sn19 3.053(2) . ?
Sn19 Mo1 3.004(2) . ?
Mo1 C13 1.88(2) . ?
Mo1 C12 1.87(2) . ?
Mo1 C11 1.89(2) . ?
C11 O11 1.16(2) . ?
C12 O12 1.21(2) . ?
C13 O13 1.21(2) . ?
Sn21 Sn25 2.947(2) . ?
Sn21 Sn23 2.950(2) . ?
Sn21 Sn24 2.961(3) . ?
Sn21 Sn22 2.967(3) . ?
Sn22 Sn26 2.926(2) . ?
Sn22 Sn27 2.946(2) . ?
Sn22 Sn25 3.155(3) . ?
Sn22 Sn23 3.216(3) . ?
Sn23 Sn27 2.939(2) . ?
Sn23 Sn28 2.959(2) . ?
Sn23 Sn24 3.146(3) . ?
Sn24 Sn29 2.968(2) . ?
Sn24 Sn28 2.984(2) . ?
Sn24 Sn25 3.189(2) . ?
Sn25 Sn29 2.980(2) . ?
Sn25 Sn26 2.984(2) . ?
Sn26 Mo2 2.946(2) . ?
Sn26 Sn29 3.073(2) . ?
Sn26 Sn27 3.082(2) . ?
Sn27 Mo2 2.993(2) . ?
Sn27 Sn28 3.102(2) . ?
Sn28 Mo2 2.999(2) . ?
Sn28 Sn29 3.082(2) . ?
Sn29 Mo2 3.004(3) . ?
Mo2 C21 1.77(2) . ?
Mo2 C23 1.84(2) . ?
Mo2 C22 1.86(3) . ?
C21 O21 1.27(2) . ?
C22 O22 1.20(3) . ?
C23 O23 1.27(3) . ?
K1 O123 2.780(12) . ?
K1 O120 2.787(14) . ?
K1 O112 2.789(12) . ?
K1 O115 2.808(12) . ?
K1 O106 2.839(12) . ?
K1 O103 2.877(10) . ?
K1 N109 2.963(14) . ?
K1 N100 3.009(14) . ?
N100 C118 1.46(3) . ?
N100 C101 1.50(2) . ?
N100 C117 1.48(2) . ?
C101 C102 1.42(3) . ?
C102 O103 1.41(2) . ?
O103 C104 1.39(2) . ?
C104 C105 1.45(2) . ?
C105 O106 1.46(2) . ?
O106 C107 1.39(2) . ?
C107 C108 1.51(2) . ?
C108 N109 1.45(2) . ?
N109 C125 1.45(2) . ?
N109 C110 1.52(2) . ?
C110 C111 1.51(3) . ?
C111 O112 1.40(2) . ?
O112 C113 1.37(2) . ?
C113 C114 1.50(3) . ?
C114 O115 1.43(2) . ?
O115 C116 1.45(2) . ?
C116 C117 1.42(2) . ?
C118 C119 1.47(3) . ?
C119 O120 1.47(2) . ?
O120 C121 1.47(2) . ?
C121 C122 1.44(3) . ?
C122 O123 1.40(2) . ?
O123 C124 1.44(2) . ?
C124 C125 1.48(3) . ?
K2 O223 2.790(13) . ?
K2 O220 2.784(12) . ?
K2 O212 2.792(13) . ?
K2 O206 2.846(12) . ?
K2 O215 2.858(12) . ?
K2 O203 2.875(14) . ?
K2 N200 2.947(14) . ?
K2 N209 2.99(2) . ?
N200 C217 1.51(2) . ?
N200 C218 1.49(2) . ?
N200 C201 1.52(2) . ?
C201 C202 1.48(3) . ?
C202 O203 1.44(2) . ?
O203 C204 1.42(2) . ?
C204 C205 1.48(3) . ?
C205 O206 1.45(3) . ?
O206 C207 1.40(2) . ?
C207 C208 1.41(3) . ?
C208 N209 1.45(3) . ?
N209 C225 1.40(2) . ?
N209 C210 1.45(3) . ?
C210 C211 1.52(2) . ?
C211 O212 1.44(2) . ?
O212 C213 1.45(2) . ?
C213 C214 1.50(3) . ?
C214 O215 1.37(2) . ?
O215 C216 1.42(2) . ?
C216 C217 1.42(3) . ?
C218 C219 1.48(3) . ?
C219 O220 1.40(2) . ?
O220 C221 1.44(2) . ?
C221 C222 1.53(3) . ?
C222 O223 1.44(2) . ?
O223 C224 1.49(2) . ?
C224 C225 1.51(3) . ?
K3 O320 2.745(13) . ?
K3 O306 2.783(14) . ?
K3 O312 2.81(2) . ?
K3 O303 2.848(12) . ?
K3 O315 2.85(2) . ?
K3 O323 2.864(15) . ?
K3 N300 2.97(2) . ?
K3 N309 3.00(2) . ?
K3 C319 3.54(2) . ?
N300 C318 1.47(2) . ?
N300 C317 1.47(2) . ?
N300 C301 1.50(2) . ?
C301 C302 1.48(2) . ?
C302 O303 1.42(2) . ?
O303 C304 1.46(2) . ?
C304 C305 1.50(3) . ?
C305 O306 1.39(2) . ?
O306 C307 1.43(3) . ?
C307 C308 1.53(3) . ?
C308 N309 1.48(3) . ?
N309 C310 1.44(3) . ?
N309 C325 1.51(3) . ?
C310 C311 1.45(3) . ?
C311 O312 1.42(3) . ?
O312 C313 1.35(3) . ?
C313 C314 1.36(4) . ?
C314 O315 1.26(3) . ?
O315 C316 1.41(3) . ?
C316 C317 1.54(3) . ?
C318 C319 1.47(3) . ?
C319 O320 1.42(2) . ?
O320 C321 1.45(2) . ?
C321 C322 1.46(3) . ?
C322 O323 1.40(2) . ?
O323 C324 1.37(3) . ?
C324 C325 1.50(3) . ?
K4 O420 2.82(2) . ?
K4 O415 2.837(13) . ?
K4 O423 2.85(2) . ?
K4 O403 2.852(11) . ?
K4 O406 2.876(14) . ?
K4 O412 2.91(2) . ?
K4 N400 2.95(2) . ?
K4 N409 3.00(2) . ?
N400 C417 1.45(2) . ?
N400 C401 1.51(2) . ?
N400 C418 1.52(3) . ?
C401 C402 1.47(3) . ?
C402 O403 1.42(2) . ?
O403 C404 1.45(2) . ?
C404 C405 1.53(3) . ?
C405 O406 1.34(2) . ?
O406 C407 1.38(3) . ?
C407 C408 1.45(3) . ?
C408 N409 1.44(3) . ?
N409 C425 1.36(3) . ?
N409 C410 1.49(4) . ?
C410 C411 1.54(4) . ?
C411 O412 1.36(3) . ?
O412 C413 1.48(2) . ?
C413 C414 1.48(3) . ?
C414 O415 1.41(2) . ?
O415 C416 1.48(2) . ?
C416 C417 1.51(3) . ?
C418 C419 1.60(3) . ?
C419 O420 1.31(3) . ?
O420 C421 1.40(3) . ?
C421 C422 1.34(3) . ?
C422 O423 1.42(3) . ?
O423 C424 1.33(3) . ?
C424 C425 1.38(3) . ?
K5 O520 2.814(13) . ?
K5 O503 2.805(14) . ?
K5 O523 2.820(15) . ?
K5 O506 2.863(14) . ?
K5 O512 2.848(13) . ?
K5 O515 2.894(11) . ?
K5 N500 2.947(14) . ?
K5 N509 2.97(2) . ?
N500 C518 1.41(3) . ?
N500 C501 1.44(2) . ?
N500 C517 1.46(2) . ?
C501 C502 1.52(3) . ?
C502 O503 1.39(2) . ?
O503 C504 1.44(3) . ?
C504 C505 1.46(3) . ?
C505 O506 1.42(3) . ?
O506 C507 1.38(3) . ?
C507 C508 1.42(3) . ?
C508 N509 1.49(3) . ?
N509 C510 1.52(3) . ?
N509 C525 1.48(3) . ?
C510 C511 1.51(3) . ?
C511 O512 1.41(2) . ?
O512 C513 1.48(2) . ?
C513 C514 1.43(3) . ?
C514 O515 1.39(2) . ?
O515 C516 1.44(2) . ?
C516 C517 1.45(3) . ?
C518 C519 1.51(3) . ?
C519 O520 1.41(2) . ?
O520 C521 1.45(2) . ?
C521 C522 1.44(3) . ?
C522 O523 1.37(2) . ?
O523 C524 1.42(3) . ?
C524 C525 1.40(3) . ?
K6 O612 2.791(13) . ?
K6 O606 2.811(12) . ?
K6 O603 2.815(13) . ?
K6 O615 2.825(12) . ?
K6 O620 2.853(14) . ?
K6 O623 2.859(15) . ?
K6 N609 2.92(2) . ?
K6 N600 2.97(2) . ?
N600 C618 1.45(2) . ?
N600 C601 1.46(2) . ?
N600 C617 1.49(2) . ?
C601 C602 1.50(3) . ?
O603 C602 1.43(2) . ?
O603 C604 1.46(2) . ?
C604 C605 1.43(3) . ?
C605 O606 1.47(2) . ?
O606 C607 1.37(3) . ?
C607 C608 1.54(3) . ?
C608 N609 1.49(2) . ?
N609 C625 1.44(3) . ?
N609 C610 1.50(3) . ?
C610 C611 1.55(3) . ?
C611 O612 1.43(3) . ?
O612 C613 1.45(2) . ?
C613 C614 1.46(3) . ?
C614 O615 1.36(2) . ?
O615 C616 1.41(2) . ?
C616 C617 1.51(3) . ?
C618 C619 1.53(3) . ?
C619 O620 1.40(3) . ?
O620 C621 1.41(2) . ?
C621 C622 1.43(3) . ?
C622 O623 1.39(3) . ?
O623 C624 1.39(3) . ?
C624 C625 1.45(3) . ?
K7 O720 2.90(2) . ?
K7 O723 2.92(2) . ?
K7 O712 2.97(4) . ?
K7 O715 2.86(3) . ?
K7 O706 2.87(2) . ?
K7 O703 2.86(3) . ?
K7 N709 3.13(4) . ?
K7 N700 3.00 . ?
N700 C718 1.26(4) . ?
N700 C717 1.47(5) . ?
N700 C701 1.51 . ?
C701 C702 1.50(4) . ?
C702 O703 1.23(4) . ?
O703 C704 1.51(4) . ?
C704 C705 1.35(5) . ?
C705 O706 1.13(5) . ?
O706 C707 1.56(4) . ?
C707 C708 1.44(5) . ?
C708 N709 1.41(5) . ?
N709 C710 1.66(5) . ?
N709 C725 1.26(5) . ?
C710 C711 1.54(5) . ?
C711 O712 1.32(5) . ?
O712 C713 1.25(4) . ?
C713 C714 1.26(5) . ?
C714 O715 1.26(4) . ?
O715 C716 1.37(4) . ?
C716 C717 1.59(5) . ?
C718 C719 1.52(4) . ?
C719 O720 1.31(4) . ?
O720 C721 1.19(3) . ?
C721 C722 1.29(5) . ?
C722 O723 1.50(5) . ?
O723 C724 1.18(4) . ?
C724 C725 1.38(5) . ?
K801 K802 0.53 . ?
K801 O846 2.31 . ?
K801 O843 2.46 . ?
K801 O823 2.79 . ?
K801 O820 2.80 . ?
K801 O812 2.81 . ?
K801 O806 2.83 . ?
K801 O815 2.88 . ?
K801 O803 2.91 . ?
K801 N849 2.94 . ?
K801 N800 2.94 . ?
K801 N809 2.97 . ?
N800 C857 1.41 . ?
N800 C817 1.50 . ?
N800 C858 1.50 . ?
N800 C818 1.54 . ?
N800 C801 1.54 . ?
N800 C841 1.78 . ?
N800 K802 2.78 . ?
C801 C859 1.28 . ?
C801 C802 1.48 . ?
C801 N840 1.49 . ?
C802 O860 1.26 . ?
C802 C859 1.30 . ?
C802 O803 1.44 . ?
C802 C858 1.58 . ?
C802 K802 3.36 . ?
O803 C804 1.34 . ?
O803 C861 1.37 . ?
O803 C859 1.60 . ?
O803 K802 2.64 . ?
C804 C862 1.06 . ?
C804 C861 1.07 . ?
C804 O860 1.46 . ?
C804 C805 1.61 . ?
C804 K802 3.38 . ?
C805 C862 0.69 . ?
C805 O863 1.09 . ?
C805 O806 1.45 . ?
C805 C861 1.65 . ?
O806 C864 1.31 . ?
O806 C807 1.44 . ?
O806 C862 1.75 . ?
O806 K802 2.71 . ?
C807 C865 1.17 . ?
C807 C864 1.24 . ?
C807 C808 1.43 . ?
C807 O863 1.62 . ?
C808 C865 0.54 . ?
C808 N849 1.38 . ?
C808 N809 1.39 . ?
C808 C864 2.01 . ?
N809 C848 1.08 . ?
N809 N849 1.24 . ?
N809 C847 1.36 . ?
N809 C810 1.45 . ?
N809 C825 1.51 . ?
N809 C865 1.79 . ?
N809 K802 3.19 . ?
C810 C811 1.56 . ?
C810 N849 1.68 . ?
C810 C847 1.83 . ?
C811 C851 1.34 . ?
C811 O812 1.42 . ?
C811 C850 1.54 . ?
C811 C848 1.86 . ?
C811 N849 1.90 . ?
O812 C813 1.48 . ?
O812 O852 1.58 . ?
O812 C851 1.60 . ?
O812 K802 2.80 . ?
C813 C853 1.07 . ?
C813 O852 1.24 . ?
C813 C814 1.56 . ?
C813 C851 1.57 . ?
C814 C853 1.11 . ?
C814 O815 1.38 . ?
C814 C854 1.45 . ?
C814 O855 1.88 . ?
C814 K802 3.50 . ?
O815 O855 0.64 . ?
O815 C854 1.30 . ?
O815 C816 1.42 . ?
O815 C853 1.83 . ?
O815 K802 2.59 . ?
C816 O855 1.07 . ?
C816 C856 1.13 . ?
C816 C817 1.44 . ?
C816 C857 1.70 . ?
C816 K802 3.46 . ?
C817 C856 0.81 . ?
C817 C857 0.87 . ?
C817 N840 1.71 . ?
C817 O855 1.86 . ?
C817 K802 3.45 . ?
C818 C841 0.70 . ?
C818 N840 1.29 . ?
C818 C819 1.49 . ?
C818 C842 1.72 . ?
C818 C857 1.79 . ?
C819 C841 0.90 . ?
C819 C842 1.07 . ?
C819 O820 1.40 . ?
C819 O843 1.82 . ?
O820 C842 1.02 . ?
O820 C821 1.40 . ?
O820 C844 1.67 . ?
O820 K802 3.16 . ?
C821 C844 1.35 . ?
C821 O843 1.42 . ?
C821 C822 1.61 . ?
C822 C845 0.94 . ?
C822 C844 1.06 . ?
C822 O823 1.37 . ?
O823 C845 0.66 . ?
O823 O846 1.40 . ?
O823 C824 1.51 . ?
O823 C844 1.91 . ?
O823 K802 3.31 . ?
C824 C847 1.27 . ?
C824 C845 1.52 . ?
C824 C825 1.56 . ?
C824 O846 1.63 . ?
C825 C847 1.05 . ?
C825 C848 2.00 . ?
K802 O860 2.75 . ?
K802 O846 2.78 . ?
K802 O852 2.81 . ?
K802 O855 2.83 . ?
K802 O843 2.85 . ?
K802 O863 2.88 . ?
N840 C858 1.45 . ?
N840 C857 1.48 . ?
N840 C841 1.50 . ?
C841 C842 1.52 . ?
C842 O843 1.39 . ?
O843 C844 1.44 . ?
C844 C845 1.50 . ?
C845 O846 1.39 . ?
O846 C847 1.40 . ?
C847 C848 1.48 . ?
C848 N849 1.57 . ?
N849 C850 1.46 . ?
N849 C865 1.46 . ?
C850 C851 1.53 . ?
C851 O852 1.44 . ?
O852 C853 1.35 . ?
C853 C854 1.30 . ?
C854 O855 1.32 . ?
O855 C856 1.40 . ?
C856 C857 1.55 . ?
C858 C859 1.47 . ?
C859 O860 1.41 . ?
O860 C861 1.45 . ?
C861 C862 1.47 . ?
C862 O863 1.42 . ?
O863 C864 1.45 . ?
C864 C865 1.48 . ?
N900 C901 1.31(4) . ?
C901 C902 1.52(4) . ?
C902 N903 1.42(4) . ?
N910 C911 1.54(5) . ?
C911 C912 1.63(5) . ?
C912 N913 1.55(5) . ?
 
loop_
  _geom_angle_atom_site_label_1
  _geom_angle_atom_site_label_2
  _geom_angle_atom_site_label_3
  _geom_angle
  _geom_angle_site_symmetry_1
  _geom_angle_site_symmetry_3
  _geom_angle_publ_flag
Sn13 Sn11 Sn15 100.25(6) . . ?
Sn13 Sn11 Sn14 67.92(5) . . ?
Sn15 Sn11 Sn14 64.10(5) . . ?
Sn13 Sn11 Sn12 65.66(6) . . ?
Sn15 Sn11 Sn12 64.83(5) . . ?
Sn14 Sn11 Sn12 99.82(5) . . ?
Sn11 Sn12 Sn17 109.05(7) . . ?
Sn11 Sn12 Sn16 110.37(6) . . ?
Sn17 Sn12 Sn16 61.96(5) . . ?
Sn11 Sn12 Sn15 57.51(5) . . ?
Sn17 Sn12 Sn15 101.65(6) . . ?
Sn16 Sn12 Sn15 58.27(4) . . ?
Sn11 Sn12 Sn13 56.55(5) . . ?
Sn17 Sn12 Sn13 57.07(5) . . ?
Sn16 Sn12 Sn13 100.85(6) . . ?
Sn15 Sn12 Sn13 90.31(6) . . ?
Sn11 Sn13 Sn17 110.91(7) . . ?
Sn11 Sn13 Sn18 108.92(6) . . ?
Sn17 Sn13 Sn18 63.17(5) . . ?
Sn11 Sn13 Sn12 57.79(5) . . ?
Sn17 Sn13 Sn12 57.86(5) . . ?
Sn18 Sn13 Sn12 101.30(5) . . ?
Sn11 Sn13 Sn14 56.61(5) . . ?
Sn17 Sn13 Sn14 100.29(5) . . ?
Sn18 Sn13 Sn14 56.02(4) . . ?
Sn12 Sn13 Sn14 88.79(5) . . ?
Sn19 Sn14 Sn18 62.50(5) . . ?
Sn19 Sn14 Sn11 111.17(6) . . ?
Sn18 Sn14 Sn11 108.26(6) . . ?
Sn19 Sn14 Sn15 58.95(5) . . ?
Sn18 Sn14 Sn15 102.20(5) . . ?
Sn11 Sn14 Sn15 57.89(5) . . ?
Sn19 Sn14 Sn13 100.14(5) . . ?
Sn18 Sn14 Sn13 56.46(5) . . ?
Sn11 Sn14 Sn13 55.47(5) . . ?
Sn15 Sn14 Sn13 89.15(6) . . ?
Sn11 Sn15 Sn19 109.71(6) . . ?
Sn11 Sn15 Sn16 109.95(6) . . ?
Sn19 Sn15 Sn16 60.72(5) . . ?
Sn11 Sn15 Sn14 58.01(5) . . ?
Sn19 Sn15 Sn14 57.21(4) . . ?
Sn16 Sn15 Sn14 100.88(5) . . ?
Sn11 Sn15 Sn12 57.66(5) . . ?
Sn19 Sn15 Sn12 100.70(5) . . ?
Sn16 Sn15 Sn12 57.65(4) . . ?
Sn14 Sn15 Sn12 91.73(6) . . ?
Sn12 Sn16 Sn15 64.08(5) . . ?
Sn12 Sn16 Mo1 114.58(6) . . ?
Sn15 Sn16 Mo1 115.54(6) . . ?
Sn12 Sn16 Sn19 104.45(6) . . ?
Sn15 Sn16 Sn19 59.59(5) . . ?
Mo1 Sn16 Sn19 59.48(5) . . ?
Sn12 Sn16 Sn17 58.99(5) . . ?
Sn15 Sn16 Sn17 103.65(5) . . ?
Mo1 Sn16 Sn17 58.49(5) . . ?
Sn19 Sn16 Sn17 90.50(6) . . ?
Sn13 Sn17 Mo1 115.23(6) . . ?
Sn13 Sn17 Sn12 65.07(5) . . ?
Mo1 Sn17 Sn12 116.19(6) . . ?
Sn13 Sn17 Sn16 104.42(5) . . ?
Mo1 Sn17 Sn16 60.14(5) . . ?
Sn12 Sn17 Sn16 59.05(5) . . ?
Sn13 Sn17 Sn18 58.60(5) . . ?
Mo1 Sn17 Sn18 58.83(5) . . ?
Sn12 Sn17 Sn18 103.12(5) . . ?
Sn16 Sn17 Sn18 89.28(5) . . ?
Sn14 Sn18 Sn13 67.52(5) . . ?
Sn14 Sn18 Mo1 115.74(6) . . ?
Sn13 Sn18 Mo1 114.65(7) . . ?
Sn14 Sn18 Sn19 58.63(4) . . ?
Sn13 Sn18 Sn19 105.13(6) . . ?
Mo1 Sn18 Sn19 59.68(5) . . ?
Sn14 Sn18 Sn17 104.84(6) . . ?
Sn13 Sn18 Sn17 58.23(5) . . ?
Mo1 Sn18 Sn17 58.59(5) . . ?
Sn19 Sn18 Sn17 89.45(5) . . ?
Sn14 Sn19 Sn15 63.84(5) . . ?
Sn14 Sn19 Mo1 115.35(6) . . ?
Sn15 Sn19 Mo1 116.35(6) . . ?
Sn14 Sn19 Sn16 104.89(5) . . ?
Sn15 Sn19 Sn16 59.69(5) . . ?
Mo1 Sn19 Sn16 60.25(5) . . ?
Sn14 Sn19 Sn18 58.87(5) . . ?
Sn15 Sn19 Sn18 103.09(5) . . ?
Mo1 Sn19 Sn18 59.02(5) . . ?
Sn16 Sn19 Sn18 90.76(5) . . ?
C13 Mo1 C12 79.2(9) . . ?
C13 Mo1 C11 89.8(8) . . ?
C12 Mo1 C11 86.4(9) . . ?
C13 Mo1 Sn17 159.1(6) . . ?
C12 Mo1 Sn17 92.8(6) . . ?
C11 Mo1 Sn17 109.1(6) . . ?
C13 Mo1 Sn18 98.8(6) . . ?
C12 Mo1 Sn18 96.3(6) . . ?
C11 Mo1 Sn18 171.3(7) . . ?
Sn17 Mo1 Sn18 62.59(5) . . ?
C13 Mo1 Sn19 85.5(6) . . ?
C12 Mo1 Sn19 150.6(7) . . ?
C11 Mo1 Sn19 118.7(6) . . ?
Sn17 Mo1 Sn19 92.69(5) . . ?
Sn18 Mo1 Sn19 61.30(5) . . ?
C13 Mo1 Sn16 132.9(6) . . ?
C12 Mo1 Sn16 145.0(7) . . ?
C11 Mo1 Sn16 81.1(7) . . ?
Sn17 Mo1 Sn16 61.37(5) . . ?
Sn18 Mo1 Sn16 92.10(6) . . ?
Sn19 Mo1 Sn16 60.27(5) . . ?
O11 C11 Mo1 175.2(21) . . ?
O12 C12 Mo1 177.1(19) . . ?
O13 C13 Mo1 174.5(17) . . ?
Sn25 Sn21 Sn23 98.94(6) . . ?
Sn25 Sn21 Sn24 65.34(6) . . ?
Sn23 Sn21 Sn24 64.30(7) . . ?
Sn25 Sn21 Sn22 64.48(6) . . ?
Sn23 Sn21 Sn22 65.84(7) . . ?
Sn24 Sn21 Sn22 98.83(6) . . ?
Sn26 Sn22 Sn27 63.32(5) . . ?
Sn26 Sn22 Sn21 111.22(8) . . ?
Sn27 Sn22 Sn21 109.89(8) . . ?
Sn26 Sn22 Sn25 58.63(6) . . ?
Sn27 Sn22 Sn25 102.70(6) . . ?
Sn21 Sn22 Sn25 57.46(6) . . ?
Sn26 Sn22 Sn23 100.84(6) . . ?
Sn27 Sn22 Sn23 56.76(5) . . ?
Sn21 Sn22 Sn23 56.82(6) . . ?
Sn25 Sn22 Sn23 89.42(7) . . ?
Sn27 Sn23 Sn21 110.59(7) . . ?
Sn27 Sn23 Sn28 63.46(5) . . ?
Sn21 Sn23 Sn28 111.81(8) . . ?
Sn27 Sn23 Sn24 102.75(7) . . ?
Sn21 Sn23 Sn24 58.03(7) . . ?
Sn28 Sn23 Sn24 58.42(6) . . ?
Sn27 Sn23 Sn22 57.00(5) . . ?
Sn21 Sn23 Sn22 57.34(7) . . ?
Sn28 Sn23 Sn22 101.50(6) . . ?
Sn24 Sn23 Sn22 90.10(6) . . ?
Sn21 Sn24 Sn29 110.26(7) . . ?
Sn21 Sn24 Sn28 110.79(8) . . ?
Sn29 Sn24 Sn28 62.38(5) . . ?
Sn21 Sn24 Sn23 57.67(6) . . ?
Sn29 Sn24 Sn23 101.15(7) . . ?
Sn28 Sn24 Sn23 57.66(5) . . ?
Sn21 Sn24 Sn25 57.12(6) . . ?
Sn29 Sn24 Sn25 57.75(5) . . ?
Sn28 Sn24 Sn25 101.76(6) . . ?
Sn23 Sn24 Sn25 90.06(7) . . ?
Sn21 Sn25 Sn29 110.32(6) . . ?
Sn21 Sn25 Sn26 110.14(7) . . ?
Sn29 Sn25 Sn26 62.02(5) . . ?
Sn21 Sn25 Sn22 58.06(7) . . ?
Sn29 Sn25 Sn22 100.92(6) . . ?
Sn26 Sn25 Sn22 56.85(6) . . ?
Sn21 Sn25 Sn24 57.54(6) . . ?
Sn29 Sn25 Sn24 57.39(5) . . ?
Sn26 Sn25 Sn24 100.79(6) . . ?
Sn22 Sn25 Sn24 90.41(7) . . ?
Sn22 Sn26 Mo2 115.39(7) . . ?
Sn22 Sn26 Sn25 64.51(6) . . ?
Mo2 Sn26 Sn25 115.69(7) . . ?
Sn22 Sn26 Sn29 104.13(7) . . ?
Mo2 Sn26 Sn29 59.83(6) . . ?
Sn25 Sn26 Sn29 58.92(5) . . ?
Sn22 Sn26 Sn27 58.66(5) . . ?
Mo2 Sn26 Sn27 59.48(5) . . ?
Sn25 Sn26 Sn27 103.56(6) . . ?
Sn29 Sn26 Sn27 90.42(5) . . ?
Sn23 Sn27 Sn22 66.24(6) . . ?
Sn23 Sn27 Mo2 114.29(7) . . ?
Sn22 Sn27 Mo2 113.37(7) . . ?
Sn23 Sn27 Sn26 103.75(6) . . ?
Sn22 Sn27 Sn26 58.02(6) . . ?
Mo2 Sn27 Sn26 57.99(5) . . ?
Sn23 Sn27 Sn28 58.60(6) . . ?
Sn22 Sn27 Sn28 104.55(7) . . ?
Mo2 Sn27 Sn28 58.92(5) . . ?
Sn26 Sn27 Sn28 89.56(6) . . ?
Sn23 Sn28 Sn24 63.92(6) . . ?
Sn23 Sn28 Mo2 113.51(7) . . ?
Sn24 Sn28 Mo2 114.33(7) . . ?
Sn23 Sn28 Sn29 102.85(6) . . ?
Sn24 Sn28 Sn29 58.56(5) . . ?
Mo2 Sn28 Sn29 59.18(6) . . ?
Sn23 Sn28 Sn27 57.95(6) . . ?
Sn24 Sn28 Sn27 102.76(6) . . ?
Mo2 Sn28 Sn27 58.74(5) . . ?
Sn29 Sn28 Sn27 89.89(5) . . ?
Sn24 Sn29 Sn25 64.85(5) . . ?
Sn24 Sn29 Mo2 114.66(7) . . ?
Sn25 Sn29 Mo2 114.09(7) . . ?
Sn24 Sn29 Sn26 103.94(7) . . ?
Sn25 Sn29 Sn26 59.06(5) . . ?
Mo2 Sn29 Sn26 58.00(5) . . ?
Sn24 Sn29 Sn28 59.06(5) . . ?
Sn25 Sn29 Sn28 104.42(6) . . ?
Mo2 Sn29 Sn28 59.03(5) . . ?
Sn26 Sn29 Sn28 90.11(6) . . ?
C21 Mo2 C23 86.8(10) . . ?
C21 Mo2 C22 98.7(10) . . ?
C23 Mo2 C22 92.8(11) . . ?
C21 Mo2 Sn26 135.1(6) . . ?
C23 Mo2 Sn26 79.7(7) . . ?
C22 Mo2 Sn26 124.4(8) . . ?
C21 Mo2 Sn27 81.0(6) . . ?
C23 Mo2 Sn27 106.1(8) . . ?
C22 Mo2 Sn27 161.0(7) . . ?
Sn26 Mo2 Sn27 62.52(6) . . ?
C21 Mo2 Sn28 90.7(6) . . ?
C23 Mo2 Sn28 168.4(8) . . ?
C22 Mo2 Sn28 98.8(7) . . ?
Sn26 Mo2 Sn28 94.23(6) . . ?
Sn27 Mo2 Sn28 62.35(6) . . ?
C21 Mo2 Sn29 150.7(6) . . ?
C23 Mo2 Sn29 122.2(8) . . ?
C22 Mo2 Sn29 77.5(8) . . ?
Sn26 Mo2 Sn29 62.18(6) . . ?
Sn27 Mo2 Sn29 93.51(6) . . ?
Sn28 Mo2 Sn29 61.79(6) . . ?
O21 C21 Mo2 166.2(17) . . ?
O22 C22 Mo2 165.0(23) . . ?
O23 C23 Mo2 178.3(21) . . ?
O123 K1 O120 60.7(4) . . ?
O123 K1 O112 96.3(4) . . ?
O120 K1 O112 114.3(5) . . ?
O123 K1 O115 134.2(4) . . ?
O120 K1 O115 92.2(4) . . ?
O112 K1 O115 59.8(3) . . ?
O123 K1 O106 101.3(4) . . ?
O120 K1 O106 143.4(4) . . ?
O112 K1 O106 98.4(4) . . ?
O115 K1 O106 119.4(4) . . ?
O123 K1 O103 121.6(4) . . ?
O120 K1 O103 100.7(4) . . ?
O112 K1 O103 138.0(4) . . ?
O115 K1 O103 98.0(3) . . ?
O106 K1 O103 59.7(3) . . ?
O123 K1 N109 61.8(4) . . ?
O120 K1 N109 121.2(4) . . ?
O112 K1 N109 61.3(4) . . ?
O115 K1 N109 120.1(4) . . ?
O106 K1 N109 60.4(4) . . ?
O103 K1 N109 119.1(4) . . ?
O123 K1 N100 119.1(4) . . ?
O120 K1 N100 59.8(4) . . ?
O112 K1 N100 118.7(4) . . ?
O115 K1 N100 59.7(4) . . ?
O106 K1 N100 118.7(4) . . ?
O103 K1 N100 60.2(4) . . ?
N109 K1 N100 179.0(5) . . ?
C118 N100 C101 111.0(15) . . ?
C118 N100 C117 110.2(15) . . ?
C101 N100 C117 109.1(14) . . ?
C118 N100 K1 110.5(10) . . ?
C101 N100 K1 107.8(11) . . ?
C117 N100 K1 108.2(10) . . ?
C102 C101 N100 116.3(18) . . ?
O103 C102 C101 111.8(16) . . ?
C104 O103 C102 115.5(13) . . ?
C104 O103 K1 113.2(9) . . ?
C102 O103 K1 117.5(9) . . ?
O103 C104 C105 114.5(16) . . ?
O106 C105 C104 108.1(14) . . ?
C107 O106 C105 112.1(12) . . ?
C107 O106 K1 116.8(10) . . ?
C105 O106 K1 115.2(10) . . ?
O106 C107 C108 111.7(14) . . ?
N109 C108 C107 112.2(16) . . ?
C125 N109 C108 111.8(15) . . ?
C125 N109 C110 108.5(15) . . ?
C108 N109 C110 109.9(15) . . ?
C125 N109 K1 107.7(12) . . ?
C108 N109 K1 110.7(10) . . ?
C110 N109 K1 108.1(10) . . ?
C111 C110 N109 111.6(16) . . ?
O112 C111 C110 109.9(18) . . ?
C113 O112 C111 111.6(16) . . ?
C113 O112 K1 118.2(11) . . ?
C111 O112 K1 118.3(11) . . ?
O112 C113 C114 107.5(18) . . ?
O115 C114 C113 109.0(18) . . ?
C114 O115 C116 113.2(15) . . ?
C114 O115 K1 111.3(11) . . ?
C116 O115 K1 118.7(11) . . ?
C117 C116 O115 110.7(17) . . ?
C116 C117 N100 113.3(16) . . ?
C119 C118 N100 112.9(17) . . ?
C118 C119 O120 108.1(16) . . ?
C119 O120 C121 109.9(14) . . ?
C119 O120 K1 117.2(11) . . ?
C121 O120 K1 113.9(11) . . ?
C122 C121 O120 108.8(17) . . ?
O123 C122 C121 110.3(18) . . ?
C122 O123 C124 112.4(14) . . ?
C122 O123 K1 113.8(11) . . ?
C124 O123 K1 117.2(11) . . ?
O123 C124 C125 110.8(16) . . ?
N109 C125 C124 114.8(17) . . ?
O223 K2 O220 59.6(4) . . ?
O223 K2 O212 99.3(4) . . ?
O220 K2 O212 122.4(4) . . ?
O223 K2 O206 96.2(4) . . ?
O220 K2 O206 133.6(4) . . ?
O212 K2 O206 98.8(4) . . ?
O223 K2 O215 139.2(4) . . ?
O220 K2 O215 100.4(4) . . ?
O212 K2 O215 59.5(3) . . ?
O206 K2 O215 119.9(4) . . ?
O223 K2 O203 117.3(4) . . ?
O220 K2 O203 95.6(4) . . ?
O212 K2 O203 137.6(4) . . ?
O206 K2 O203 58.7(4) . . ?
O215 K2 O203 98.6(4) . . ?
O223 K2 N200 119.9(4) . . ?
O220 K2 N200 61.0(4) . . ?
O212 K2 N200 119.5(4) . . ?
O206 K2 N200 118.4(4) . . ?
O215 K2 N200 60.8(4) . . ?
O203 K2 N200 60.6(4) . . ?
O223 K2 N209 60.8(4) . . ?
O220 K2 N209 120.0(4) . . ?
O212 K2 N209 61.8(4) . . ?
O206 K2 N209 59.5(4) . . ?
O215 K2 N209 120.2(4) . . ?
O203 K2 N209 117.4(4) . . ?
N200 K2 N209 177.9(5) . . ?
C217 N200 C218 110.0(14) . . ?
C217 N200 C201 110.2(14) . . ?
C218 N200 C201 108.1(14) . . ?
C217 N200 K2 109.9(11) . . ?
C218 N200 K2 108.5(11) . . ?
C201 N200 K2 110.3(9) . . ?
C202 C201 N200 110.5(16) . . ?
O203 C202 C201 107.4(16) . . ?
C202 O203 C204 110.3(14) . . ?
C202 O203 K2 112.9(11) . . ?
C204 O203 K2 114.5(12) . . ?
O203 C204 C205 111.7(18) . . ?
O206 C205 C204 107.0(18) . . ?
C207 O206 C205 112.7(15) . . ?
C207 O206 K2 116.6(12) . . ?
C205 O206 K2 118.1(11) . . ?
C208 C207 O206 113.0(19) . . ?
C207 C208 N209 114.4(19) . . ?
C225 N209 C210 108.4(17) . . ?
C225 N209 C208 111.1(16) . . ?
C210 N209 C208 112.4(17) . . ?
C225 N209 K2 109.7(12) . . ?
C210 N209 K2 105.7(11) . . ?
C208 N209 K2 109.4(12) . . ?
N209 C210 C211 117.4(18) . . ?
O212 C211 C210 106.0(15) . . ?
C213 O212 C211 110.0(14) . . ?
C213 O212 K2 116.6(11) . . ?
C211 O212 K2 118.8(11) . . ?
O212 C213 C214 108.9(16) . . ?
O215 C214 C213 110.6(17) . . ?
C214 O215 C216 112.1(14) . . ?
C214 O215 K2 115.2(10) . . ?
C216 O215 K2 114.3(11) . . ?
C217 C216 O215 112.3(17) . . ?
C216 C217 N200 114.0(17) . . ?
C219 C218 N200 115.2(16) . . ?
O220 C219 C218 109.0(17) . . ?
C219 O220 C221 111.5(14) . . ?
C219 O220 K2 119.1(11) . . ?
C221 O220 K2 117.6(10) . . ?
O220 C221 C222 109.3(15) . . ?
O223 C222 C221 105.7(17) . . ?
C222 O223 C224 106.7(15) . . ?
C222 O223 K2 116.9(10) . . ?
C224 O223 K2 117.6(11) . . ?
O223 C224 C225 106.1(18) . . ?
N209 C225 C224 117.3(17) . . ?
O320 K3 O306 133.7(4) . . ?
O320 K3 O312 125.3(5) . . ?
O306 K3 O312 96.4(5) . . ?
O320 K3 O303 96.1(4) . . ?
O306 K3 O303 59.2(4) . . ?
O312 K3 O303 133.5(5) . . ?
O320 K3 O315 99.0(6) . . ?
O306 K3 O315 122.7(6) . . ?
O312 K3 O315 56.0(5) . . ?
O303 K3 O315 101.8(4) . . ?
O320 K3 O323 59.8(4) . . ?
O306 K3 O323 96.9(5) . . ?
O312 K3 O323 100.8(5) . . ?
O303 K3 O323 119.7(4) . . ?
O315 K3 O323 133.9(5) . . ?
O320 K3 N300 62.6(4) . . ?
O306 K3 N300 118.9(4) . . ?
O312 K3 N300 117.0(5) . . ?
O303 K3 N300 60.8(4) . . ?
O315 K3 N300 61.0(4) . . ?
O323 K3 N300 122.1(4) . . ?
O320 K3 N309 120.8(5) . . ?
O306 K3 N309 60.8(5) . . ?
O312 K3 N309 59.6(5) . . ?
O303 K3 N309 119.5(5) . . ?
O315 K3 N309 115.6(5) . . ?
O323 K3 N309 61.6(5) . . ?
N300 K3 N309 176.0(5) . . ?
O320 K3 C319 21.9(4) . . ?
O306 K3 C319 126.5(5) . . ?
O312 K3 C319 137.0(5) . . ?
O303 K3 C319 76.8(4) . . ?
O315 K3 C319 93.0(6) . . ?
O323 K3 C319 79.0(4) . . ?
N300 K3 C319 43.3(4) . . ?
N309 K3 C319 140.4(5) . . ?
C318 N300 C317 113.5(16) . . ?
C318 N300 C301 109.0(14) . . ?
C317 N300 C301 108.0(14) . . ?
C318 N300 K3 105.6(12) . . ?
C317 N300 K3 110.1(12) . . ?
C301 N300 K3 110.6(11) . . ?
C302 C301 N300 112.4(14) . . ?
O303 C302 C301 109.7(15) . . ?
C302 O303 C304 112.1(13) . . ?
C302 O303 K3 112.9(10) . . ?
C304 O303 K3 115.0(10) . . ?
O303 C304 C305 107.9(15) . . ?
O306 C305 C304 107.3(18) . . ?
C305 O306 C307 106.1(17) . . ?
C305 O306 K3 116.1(13) . . ?
C307 O306 K3 118.5(13) . . ?
O306 C307 C308 106.5(21) . . ?
C307 C308 N309 112.4(20) . . ?
C310 N309 C325 108.6(21) . . ?
C310 N309 C308 109.7(20) . . ?
C325 N309 C308 114.8(22) . . ?
C310 N309 K3 109.4(17) . . ?
C325 N309 K3 106.9(15) . . ?
C308 N309 K3 107.4(15) . . ?
C311 C310 N309 113.3(24) . . ?
O312 C311 C310 111.3(23) . . ?
C313 O312 C311 114.0(21) . . ?
C313 O312 K3 115.1(19) . . ?
C311 O312 K3 117.8(15) . . ?
C314 C313 O312 108.7(32) . . ?
O315 C314 C313 116.4(36) . . ?
C314 O315 C316 120.9(25) . . ?
C314 O315 K3 115.9(21) . . ?
C316 O315 K3 113.3(12) . . ?
O315 C316 C317 108.8(18) . . ?
N300 C317 C316 110.2(17) . . ?
C319 C318 N300 113.7(18) . . ?
O320 C319 C318 108.9(16) . . ?
O320 C319 K3 46.0(8) . . ?
C318 C319 K3 82.5(12) . . ?
C319 O320 C321 113.2(14) . . ?
C319 O320 K3 112.1(10) . . ?
C321 O320 K3 117.8(11) . . ?
O320 C321 C322 106.5(16) . . ?
O323 C322 C321 110.7(18) . . ?
C322 O323 C324 112.1(17) . . ?
C322 O323 K3 111.1(13) . . ?
C324 O323 K3 114.7(13) . . ?
O323 C324 C325 110.3(21) . . ?
N309 C325 C324 115.6(25) . . ?
O420 K4 O415 100.2(6) . . ?
O420 K4 O423 59.1(6) . . ?
O415 K4 O423 125.3(4) . . ?
O420 K4 O403 100.0(4) . . ?
O415 K4 O403 97.3(3) . . ?
O423 K4 O403 133.7(4) . . ?
O420 K4 O406 120.3(6) . . ?
O415 K4 O406 135.3(4) . . ?
O423 K4 O406 93.5(5) . . ?
O403 K4 O406 59.9(4) . . ?
O420 K4 O412 135.2(5) . . ?
O415 K4 O412 58.5(4) . . ?
O423 K4 O412 99.1(5) . . ?
O403 K4 O412 120.2(4) . . ?
O406 K4 O412 97.9(5) . . ?
O420 K4 N400 62.1(5) . . ?
O415 K4 N400 60.7(4) . . ?
O423 K4 N400 120.9(6) . . ?
O403 K4 N400 61.8(4) . . ?
O406 K4 N400 121.0(4) . . ?
O412 K4 N400 118.8(5) . . ?
O420 K4 N409 116.6(6) . . ?
O415 K4 N409 119.4(5) . . ?
O423 K4 N409 57.7(6) . . ?
O403 K4 N409 119.4(5) . . ?
O406 K4 N409 60.1(5) . . ?
O412 K4 N409 61.4(5) . . ?
N400 K4 N409 178.6(5) . . ?
C417 N400 C401 110.9(15) . . ?
C417 N400 C418 111.1(16) . . ?
C401 N400 C418 106.5(14) . . ?
C417 N400 K4 110.4(12) . . ?
C401 N400 K4 108.2(11) . . ?
C418 N400 K4 109.6(12) . . ?
C402 C401 N400 113.9(16) . . ?
O403 C402 C401 109.0(16) . . ?
C402 O403 C404 110.3(14) . . ?
C402 O403 K4 111.5(10) . . ?
C404 O403 K4 112.8(10) . . ?
O403 C404 C405 109.6(16) . . ?
O406 C405 C404 111.1(17) . . ?
C405 O406 C407 112.3(18) . . ?
C405 O406 K4 116.1(12) . . ?
C407 O406 K4 114.5(14) . . ?
O406 C407 C408 109.4(24) . . ?
C407 C408 N409 118.5(25) . . ?
C425 N409 C408 114.0(23) . . ?
C425 N409 C410 108.8(25) . . ?
C408 N409 C410 114.1(27) . . ?
C425 N409 K4 105.0(20) . . ?
C408 N409 K4 107.4(17) . . ?
C410 N409 K4 107.0(19) . . ?
N409 C410 C411 118.4(33) . . ?
O412 C411 C410 107.4(27) . . ?
C411 O412 C413 108.7(18) . . ?
C411 O412 K4 113.4(17) . . ?
C413 O412 K4 112.6(12) . . ?
O412 C413 C414 109.8(17) . . ?
O415 C414 C413 107.2(16) . . ?
C414 O415 C416 109.3(14) . . ?
C414 O415 K4 119.5(12) . . ?
C416 O415 K4 115.8(10) . . ?
O415 C416 C417 105.0(16) . . ?
N400 C417 C416 114.8(19) . . ?
N400 C418 C419 109.5(19) . . ?
O420 C419 C418 112.5(23) . . ?
C419 O420 C421 114.9(21) . . ?
C419 O420 K4 115.1(19) . . ?
C421 O420 K4 116.5(15) . . ?
C422 C421 O420 111.6(24) . . ?
C421 C422 O423 116.2(26) . . ?
C424 O423 C422 117.8(20) . . ?
C424 O423 K4 116.9(15) . . ?
C422 O423 K4 111.6(17) . . ?
O423 C424 C425 106.8(25) . . ?
C424 C425 N409 119.7(29) . . ?
O520 K5 O503 98.6(4) . . ?
O520 K5 O523 60.0(4) . . ?
O503 K5 O523 119.0(4) . . ?
O520 K5 O506 139.7(4) . . ?
O503 K5 O506 59.9(4) . . ?
O523 K5 O506 98.8(4) . . ?
O520 K5 O512 120.7(5) . . ?
O503 K5 O512 134.9(5) . . ?
O523 K5 O512 100.6(5) . . ?
O506 K5 O512 95.4(4) . . ?
O520 K5 O515 100.0(4) . . ?
O503 K5 O515 97.1(4) . . ?
O523 K5 O515 139.8(4) . . ?
O506 K5 O515 115.3(4) . . ?
O512 K5 O515 57.6(4) . . ?
O520 K5 N500 61.4(4) . . ?
O503 K5 N500 60.3(4) . . ?
O523 K5 N500 120.3(4) . . ?
O506 K5 N500 118.9(4) . . ?
O512 K5 N500 118.3(4) . . ?
O515 K5 N500 61.4(3) . . ?
O520 K5 N509 119.9(5) . . ?
O503 K5 N509 119.3(5) . . ?
O523 K5 N509 61.0(5) . . ?
O506 K5 N509 60.4(5) . . ?
O512 K5 N509 61.0(5) . . ?
O515 K5 N509 117.7(5) . . ?
N500 K5 N509 178.7(5) . . ?
C518 N500 C501 111.1(15) . . ?
C518 N500 C517 109.1(15) . . ?
C501 N500 C517 108.4(16) . . ?
C518 N500 K5 107.3(12) . . ?
C501 N500 K5 110.8(11) . . ?
C517 N500 K5 110.0(10) . . ?
N500 C501 C502 114.7(17) . . ?
O503 C502 C501 109.8(20) . . ?
C502 O503 C504 107.2(17) . . ?
C502 O503 K5 119.5(13) . . ?
C504 O503 K5 116.7(12) . . ?
O503 C504 C505 108.1(21) . . ?
O506 C505 C504 113.9(20) . . ?
C505 O506 C507 114.8(17) . . ?
C505 O506 K5 113.0(12) . . ?
C507 O506 K5 113.8(15) . . ?
O506 C507 C508 109.1(21) . . ?
C507 C508 N509 114.8(23) . . ?
C510 N509 C508 112.7(20) . . ?
C510 N509 C525 106.8(20) . . ?
C508 N509 C525 115.0(20) . . ?
C510 N509 K5 107.3(13) . . ?
C508 N509 K5 106.5(15) . . ?
C525 N509 K5 108.2(14) . . ?
N509 C510 C511 112.2(21) . . ?
O512 C511 C510 108.0(20) . . ?
C511 O512 C513 113.4(16) . . ?
C511 O512 K5 117.4(13) . . ?
C513 O512 K5 116.9(11) . . ?
C514 C513 O512 107.5(18) . . ?
O515 C514 C513 108.9(18) . . ?
C514 O515 C516 112.6(14) . . ?
C514 O515 K5 113.9(11) . . ?
C516 O515 K5 112.2(10) . . ?
C517 C516 O515 113.0(17) . . ?
C516 C517 N500 114.8(17) . . ?
N500 C518 C519 114.9(18) . . ?
O520 C519 C518 107.7(17) . . ?
C519 O520 C521 111.8(15) . . ?
C519 O520 K5 115.1(12) . . ?
C521 O520 K5 112.8(12) . . ?
C522 C521 O520 108.8(19) . . ?
O523 C522 C521 112.6(21) . . ?
C524 O523 C522 113.4(19) . . ?
C524 O523 K5 115.3(14) . . ?
C522 O523 K5 114.5(12) . . ?
O523 C524 C525 111.9(24) . . ?
C524 C525 N509 117.0(23) . . ?
O612 K6 O606 99.4(4) . . ?
O612 K6 O603 117.5(4) . . ?
O606 K6 O603 59.7(4) . . ?
O612 K6 O615 60.0(4) . . ?
O606 K6 O615 141.9(4) . . ?
O603 K6 O615 99.5(4) . . ?
O612 K6 O620 139.2(4) . . ?
O606 K6 O620 115.9(4) . . ?
O603 K6 O620 98.4(4) . . ?
O615 K6 O620 97.5(4) . . ?
O612 K6 O623 96.3(4) . . ?
O606 K6 O623 100.4(4) . . ?
O603 K6 O623 142.1(4) . . ?
O615 K6 O623 112.7(4) . . ?
O620 K6 O623 59.3(4) . . ?
O612 K6 N609 61.1(4) . . ?
O606 K6 N609 62.3(4) . . ?
O603 K6 N609 120.6(5) . . ?
O615 K6 N609 119.0(4) . . ?
O620 K6 N609 117.3(5) . . ?
O623 K6 N609 60.1(5) . . ?
O612 K6 N600 119.7(4) . . ?
O606 K6 N600 118.7(4) . . ?
O603 K6 N600 60.7(4) . . ?
O615 K6 N600 61.4(4) . . ?
O620 K6 N600 60.9(4) . . ?
O623 K6 N600 118.1(5) . . ?
N609 K6 N600 178.2(5) . . ?
C618 N600 C601 108.2(16) . . ?
C618 N600 C617 111.7(15) . . ?
C601 N600 C617 112.4(15) . . ?
C618 N600 K6 107.7(12) . . ?
C601 N600 K6 108.8(12) . . ?
C617 N600 K6 107.9(12) . . ?
N600 C601 C602 117.7(19) . . ?
C602 O603 C604 113.2(14) . . ?
C602 O603 K6 121.2(11) . . ?
C604 O603 K6 117.2(11) . . ?
O603 C602 C601 109.2(18) . . ?
C605 C604 O603 112.1(16) . . ?
C604 C605 O606 109.3(16) . . ?
C607 O606 C605 110.3(15) . . ?
C607 O606 K6 118.0(12) . . ?
C605 O606 K6 114.9(11) . . ?
O606 C607 C608 112.9(19) . . ?
N609 C608 C607 113.2(19) . . ?
C625 N609 C610 116.7(18) . . ?
C625 N609 C608 107.0(17) . . ?
C610 N609 C608 106.9(17) . . ?
C625 N609 K6 110.9(14) . . ?
C610 N609 K6 106.3(14) . . ?
C608 N609 K6 108.9(12) . . ?
N609 C610 C611 113.2(18) . . ?
O612 C611 C610 104.5(18) . . ?
C611 O612 C613 110.4(15) . . ?
C611 O612 K6 122.3(12) . . ?
C613 O612 K6 115.2(11) . . ?
O612 C613 C614 112.2(17) . . ?
O615 C614 C613 112.2(18) . . ?
C614 O615 C616 110.9(16) . . ?
C614 O615 K6 116.9(12) . . ?
C616 O615 K6 118.5(12) . . ?
O615 C616 C617 110.2(18) . . ?
N600 C617 C616 114.3(17) . . ?
N600 C618 C619 117.4(19) . . ?
O620 C619 C618 109.6(18) . . ?
C619 O620 C621 111.1(16) . . ?
C619 O620 K6 120.7(12) . . ?
C621 O620 K6 115.3(13) . . ?
O620 C621 C622 110.0(20) . . ?
O623 C622 C621 114.4(22) . . ?
C622 O623 C624 112.8(19) . . ?
C622 O623 K6 113.7(15) . . ?
C624 O623 K6 118.1(14) . . ?
O623 C624 C625 111.7(22) . . ?
N609 C625 C624 118.1(22) . . ?
O720 K7 O723 57.4(6) . . ?
O720 K7 O712 125.5(9) . . ?
O723 K7 O712 101.3(8) . . ?
O720 K7 O715 97.0(7) . . ?
O723 K7 O715 131.6(6) . . ?
O712 K7 O715 58.2(9) . . ?
O720 K7 O706 134.8(7) . . ?
O723 K7 O706 96.5(6) . . ?
O712 K7 O706 93.3(9) . . ?
O715 K7 O706 125.5(7) . . ?
O720 K7 O703 97.5(8) . . ?
O723 K7 O703 117.7(7) . . ?
O712 K7 O703 133.6(10) . . ?
O715 K7 O703 104.9(8) . . ?
O706 K7 O703 60.0(8) . . ?
O720 K7 N709 112.6(9) . . ?
O723 K7 N709 55.8(9) . . ?
O712 K7 N709 62.4(10) . . ?
O715 K7 N709 120.2(10) . . ?
O706 K7 N709 62.0(9) . . ?
O703 K7 N709 120.0(10) . . ?
O720 K7 N700 61.1(7) . . ?
O723 K7 N700 118.0(7) . . ?
O712 K7 N700 119.8(10) . . ?
O715 K7 N700 61.6(8) . . ?
O706 K7 N700 122.7(7) . . ?
O703 K7 N700 63.5(7) . . ?
N709 K7 N700 173.6(10) . . ?
C718 N700 C717 121.0(28) . . ?
C718 N700 C701 116.8(28) . . ?
C717 N700 C701 93.3(28) . . ?
C718 N700 K7 108.0(19) . . ?
C717 N700 K7 108.2(23) . . ?
C701 N700 K7 108.4 . . ?
C702 C701 N700 111.7(16) . . ?
O703 C702 C701 129.4(35) . . ?
C704 O703 C702 120.3(35) . . ?
C704 O703 K7 111.4(22) . . ?
C702 O703 K7 106.7(27) . . ?
O703 C704 C705 98.5(33) . . ?
O706 C705 C704 137.3(49) . . ?
C707 O706 C705 126.9(36) . . ?
C707 O706 K7 109.7(21) . . ?
C705 O706 K7 100.7(32) . . ?
O706 C707 C708 96.6(34) . . ?
N709 C708 C707 114.4(45) . . ?
C708 N709 C710 104.7(40) . . ?
C708 N709 C725 126.3(44) . . ?
C710 N709 C725 116.5(40) . . ?
C708 N709 K7 90.6(30) . . ?
C710 N709 K7 105.4(25) . . ?
C725 N709 K7 108.7(33) . . ?
C711 C710 N709 106.3(37) . . ?
O712 C711 C710 121.8(44) . . ?
C713 O712 C711 140.2(46) . . ?
C713 O712 K7 108.2(28) . . ?
C711 O712 K7 111.3(31) . . ?
O712 C713 C714 133.6(42) . . ?
O715 C714 C713 124.0(43) . . ?
C714 O715 C716 129.3(34) . . ?
C714 O715 K7 115.7(27) . . ?
C716 O715 K7 114.3(22) . . ?
O715 C716 C717 118.8(33) . . ?
C716 C717 N700 105.7(37) . . ?
N700 C718 C719 129.1(34) . . ?
O720 C719 C718 118.1(36) . . ?
C719 O720 C721 125.2(34) . . ?
C719 O720 K7 116.9(24) . . ?
C721 O720 K7 116.1(23) . . ?
O720 C721 C722 130.1(43) . . ?
O723 C722 C721 112.1(41) . . ?
C722 O723 C724 123.9(34) . . ?
C722 O723 K7 113.1(22) . . ?
C724 O723 K7 112.7(28) . . ?
O723 C724 C725 127.2(46) . . ?
N709 C725 C724 115.7(44) . . ?
K802 K801 O846 150.8 . . ?
K802 K801 O843 134.7 . . ?
O846 K801 O843 71.7 . . ?
K802 K801 O823 167.5 . . ?
O846 K801 O823 30.0 . . ?
O843 K801 O823 53.7 . . ?
K802 K801 O820 128.2 . . ?
O846 K801 O820 78.1 . . ?
O843 K801 O820 6.5 . . ?
O823 K801 O820 59.8 . . ?
K802 K801 O812 83.8 . . ?
O846 K801 O812 69.5 . . ?
O843 K801 O812 119.5 . . ?
O823 K801 O812 99.5 . . ?
O820 K801 O812 122.6 . . ?
K802 K801 O806 71.6 . . ?
O846 K801 O806 100.1 . . ?
O843 K801 O806 132.9 . . ?
O823 K801 O806 95.9 . . ?
O820 K801 O806 133.7 . . ?
O812 K801 O806 98.5 . . ?
K802 K801 O815 52.4 . . ?
O846 K801 O815 117.5 . . ?
O843 K801 O815 103.9 . . ?
O823 K801 O815 139.4 . . ?
O820 K801 O815 100.5 . . ?
O812 K801 O815 59.3 . . ?
O806 K801 O815 119.8 . . ?
K802 K801 O803 55.4 . . ?
O846 K801 O803 143.8 . . ?
O843 K801 O803 101.3 . . ?
O823 K801 O803 117.5 . . ?
O820 K801 O803 96.6 . . ?
O812 K801 O803 136.5 . . ?
O806 K801 O803 57.9 . . ?
O815 K801 O803 98.8 . . ?
K802 K801 N849 87.3 . . ?
O846 K801 N849 66.6 . . ?
O843 K801 N849 137.8 . . ?
O823 K801 N849 85.7 . . ?
O820 K801 N849 144.3 . . ?
O812 K801 N849 49.5 . . ?
O806 K801 N849 52.8 . . ?
O815 K801 N849 100.3 . . ?
O803 K801 N849 108.5 . . ?
K802 K801 N800 67.1 . . ?
O846 K801 N800 136.6 . . ?
O843 K801 N800 67.6 . . ?
O823 K801 N800 120.3 . . ?
O820 K801 N800 61.2 . . ?
O812 K801 N800 119.4 . . ?
O806 K801 N800 118.4 . . ?
O815 K801 N800 60.8 . . ?
O803 K801 N800 61.3 . . ?
N849 K801 N800 154.0 . . ?
K802 K801 N809 110.8 . . ?
O846 K801 N809 45.8 . . ?
O843 K801 N809 114.5 . . ?
O823 K801 N809 61.5 . . ?
O820 K801 N809 120.8 . . ?
O812 K801 N809 60.9 . . ?
O806 K801 N809 59.4 . . ?
O815 K801 N809 119.1 . . ?
O803 K801 N809 116.6 . . ?
N849 K801 N809 24.2 . . ?
N800 K801 N809 177.6 . . ?
C857 N800 C817 34.6 . . ?
C857 N800 C858 114.2 . . ?
C817 N800 C858 105.0 . . ?
C857 N800 C818 74.5 . . ?
C817 N800 C818 109.2 . . ?
C858 N800 C818 104.2 . . ?
C857 N800 C801 121.5 . . ?
C817 N800 C801 110.7 . . ?
C858 N800 C801 7.3 . . ?
C818 N800 C801 105.9 . . ?
C857 N800 C841 97.3 . . ?
C817 N800 C841 131.9 . . ?
C858 N800 C841 93.0 . . ?
C818 N800 C841 22.8 . . ?
C801 N800 C841 92.3 . . ?
C857 N800 K802 123.0 . . ?
C817 N800 K802 103.4 . . ?
C858 N800 K802 113.5 . . ?
C818 N800 K802 120.5 . . ?
C801 N800 K802 107.0 . . ?
C841 N800 K802 109.5 . . ?
C857 N800 K801 124.8 . . ?
C817 N800 K801 110.5 . . ?
C858 N800 K801 116.9 . . ?
C818 N800 K801 110.7 . . ?
C801 N800 K801 109.9 . . ?
C841 N800 K801 99.5 . . ?
K802 N800 K801 10.1 . . ?
C859 C801 C802 55.8 . . ?
C859 C801 N840 124.6 . . ?
C802 C801 N840 121.1 . . ?
C859 C801 N800 123.9 . . ?
C802 C801 N800 110.4 . . ?
N840 C801 N800 11.5 . . ?
O860 C802 C859 66.9 . . ?
O860 C802 O803 4.7 . . ?
C859 C802 O803 71.5 . . ?
O860 C802 C801 107.1 . . ?
C859 C802 C801 54.4 . . ?
O803 C802 C801 110.0 . . ?
O860 C802 C858 112.9 . . ?
C859 C802 C858 60.3 . . ?
O803 C802 C858 115.7 . . ?
C801 C802 C858 6.3 . . ?
O860 C802 K802 50.6 . . ?
C859 C802 K802 86.7 . . ?
O803 C802 K802 48.4 . . ?
C801 C802 K802 84.9 . . ?
C858 C802 K802 87.3 . . ?
C804 O803 C861 46.6 . . ?
C804 O803 C802 109.5 . . ?
C861 O803 C802 121.5 . . ?
C804 O803 C859 136.9 . . ?
C861 O803 C859 106.0 . . ?
C802 O803 C859 50.4 . . ?
C804 O803 K802 112.3 . . ?
C861 O803 K802 130.5 . . ?
C802 O803 K802 107.5 . . ?
C859 O803 K802 110.5 . . ?
C804 O803 K801 116.3 . . ?
C861 O803 K801 126.1 . . ?
C802 O803 K801 112.4 . . ?
C859 O803 K801 106.8 . . ?
K802 O803 K801 9.5 . . ?
C862 C804 C861 87.1 . . ?
C862 C804 O803 124.9 . . ?
C861 C804 O803 68.1 . . ?
C862 C804 O860 131.3 . . ?
C861 C804 O860 67.8 . . ?
O803 C804 O860 7.0 . . ?
C862 C804 C805 18.2 . . ?
C861 C804 C805 72.7 . . ?
O803 C804 C805 108.1 . . ?
O860 C804 C805 114.0 . . ?
C862 C804 K802 93.5 . . ?
C861 C804 K802 97.5 . . ?
O803 C804 K802 46.3 . . ?
O860 C804 K802 52.4 . . ?
C805 C804 K802 84.5 . . ?
C862 C805 O863 104.3 . . ?
C862 C805 O806 104.5 . . ?
O863 C805 O806 1.12(11) . . ?
C862 C805 C804 28.9 . . ?
O863 C805 C804 103.2 . . ?
O806 C805 C804 103.9 . . ?
C862 C805 C861 63.1 . . ?
O863 C805 C861 120.6 . . ?
O806 C805 C861 121.7 . . ?
C804 C805 C861 38.4 . . ?
C864 O806 C807 53.2 . . ?
C864 O806 C805 102.3 . . ?
C807 O806 C805 110.4 . . ?
C864 O806 C862 100.8 . . ?
C807 O806 C862 127.4 . . ?
C805 O806 C862 22.2 . . ?
C864 O806 K802 133.2 . . ?
C807 O806 K802 125.6 . . ?
C805 O806 K802 116.6 . . ?
C862 O806 K802 105.7 . . ?
C864 O806 K801 135.8 . . ?
C807 O806 K801 117.0 . . ?
C805 O806 K801 119.4 . . ?
C862 O806 K801 112.2 . . ?
K802 O806 K801 10.7 . . ?
C865 C807 C864 76.0 . . ?
C865 C807 C808 21.2 . . ?
C864 C807 C808 97.2 . . ?
C865 C807 O806 100.4 . . ?
C864 C807 O806 58.0 . . ?
C808 C807 O806 111.0 . . ?
C865 C807 O863 111.6 . . ?
C864 C807 O863 59.4 . . ?
C808 C807 O863 123.1 . . ?
O806 C807 O863 12.1 . . ?
C865 C808 N849 87.6 . . ?
C865 C808 N809 130.8 . . ?
N849 C808 N809 53.2 . . ?
C865 C808 C807 51.0 . . ?
N849 C808 C807 116.5 . . ?
N809 C808 C807 116.7 . . ?
C865 C808 C864 13.6 . . ?
N849 C808 C864 93.5 . . ?
N809 C808 C864 127.6 . . ?
C807 C808 C864 37.7 . . ?
C848 N809 N849 84.9 . . ?
C848 N809 C847 73.7 . . ?
N849 N809 C847 148.3 . . ?
C848 N809 C808 116.3 . . ?
N849 N809 C808 63.2 . . ?
C847 N809 C808 147.7 . . ?
C848 N809 C810 8.1 . . ?
N849 N809 C810 76.8 . . ?
C847 N809 C810 81.2 . . ?
C808 N809 C810 111.5 . . ?
C848 N809 C825 99.5 . . ?
N849 N809 C825 168.4 . . ?
C847 N809 C825 42.7 . . ?
C808 N809 C825 105.3 . . ?
C810 N809 C825 107.3 . . ?
C848 N809 C865 120.8 . . ?
N849 N809 C865 54.2 . . ?
C847 N809 C865 157.5 . . ?
C808 N809 C865 13.3 . . ?
C810 N809 C865 114.5 . . ?
C825 N809 C865 115.0 . . ?
C848 N809 K801 112.1 . . ?
N849 N809 K801 76.6 . . ?
C847 N809 K801 89.9 . . ?
C808 N809 K801 111.6 . . ?
C810 N809 K801 109.9 . . ?
C825 N809 K801 111.1 . . ?
C865 N809 K801 98.8 . . ?
C848 N809 K802 112.4 . . ?
N849 N809 K802 68.0 . . ?
C847 N809 K802 98.6 . . ?
C808 N809 K802 104.5 . . ?
C810 N809 K802 108.9 . . ?
C825 N809 K802 119.2 . . ?
C865 N809 K802 91.5 . . ?
K801 N809 K802 8.9 . . ?
N809 C810 C811 114.0 . . ?
N809 C810 N849 45.9 . . ?
C811 C810 N849 71.7 . . ?
N809 C810 C847 47.2 . . ?
C811 C810 C847 136.7 . . ?
N849 C810 C847 90.7 . . ?
C851 C811 O812 70.4 . . ?
C851 C811 C850 63.7 . . ?
O812 C811 C850 108.1 . . ?
C851 C811 C810 156.9 . . ?
O812 C811 C810 108.0 . . ?
C850 C811 C810 96.4 . . ?
C851 C811 C848 148.7 . . ?
O812 C811 C848 101.8 . . ?
C850 C811 C848 92.0 . . ?
C810 C811 C848 9.3 . . ?
C851 C811 N849 99.7 . . ?
O812 C811 N849 92.0 . . ?
C850 C811 N849 49.0 . . ?
C810 C811 N849 57.2 . . ?
C848 C811 N849 49.4 . . ?
C811 O812 C813 106.8 . . ?
C811 O812 O852 103.2 . . ?
C813 O812 O852 47.5 . . ?
C811 O812 C851 52.5 . . ?
C813 O812 C851 61.3 . . ?
O852 O812 C851 53.7 . . ?
C811 O812 K802 120.6 . . ?
C813 O812 K802 111.1 . . ?
O852 O812 K802 73.9 . . ?
C851 O812 K802 113.7 . . ?
C811 O812 K801 119.1 . . ?
C813 O812 K801 120.2 . . ?
O852 O812 K801 84.7 . . ?
C851 O812 K801 122.3 . . ?
K802 O812 K801 10.8 . . ?
C853 C813 O852 71.2 . . ?
C853 C813 O812 128.2 . . ?
O852 C813 O812 70.7 . . ?
C853 C813 C814 45.6 . . ?
O852 C813 C814 94.2 . . ?
O812 C813 C814 104.8 . . ?
C853 C813 C851 121.7 . . ?
O852 C813 C851 60.2 . . ?
O812 C813 C851 63.1 . . ?
C814 C813 C851 153.7 . . ?
C853 C814 O815 93.7 . . ?
C853 C814 C854 59.6 . . ?
O815 C814 C854 54.7 . . ?
C853 C814 C813 43.2 . . ?
O815 C814 C813 112.9 . . ?
C854 C814 C813 101.6 . . ?
C853 C814 O855 92.9 . . ?
O815 C814 O855 14.2 . . ?
C854 C814 O855 44.3 . . ?
C813 C814 O855 120.9 . . ?
C853 C814 K802 87.2 . . ?
O815 C814 K802 39.9 . . ?
C854 C814 K802 83.6 . . ?
C813 C814 K802 81.4 . . ?
O855 C814 K802 53.9 . . ?
O855 O815 C854 77.4 . . ?
O855 O815 C814 133.7 . . ?
C854 O815 C814 65.1 . . ?
O855 O815 C816 44.7 . . ?
C854 O815 C816 97.5 . . ?
C814 O815 C816 113.0 . . ?
O855 O815 C853 121.9 . . ?
C854 O815 C853 45.4 . . ?
C814 O815 C853 37.3 . . ?
C816 O815 C853 135.3 . . ?
O855 O815 K802 105.5 . . ?
C854 O815 K802 135.0 . . ?
C814 O815 K802 120.0 . . ?
C816 O815 K802 116.2 . . ?
C853 O815 K802 108.4 . . ?
O855 O815 K801 111.5 . . ?
C854 O815 K801 141.9 . . ?
C814 O815 K801 114.8 . . ?
C816 O815 K801 114.9 . . ?
C853 O815 K801 109.4 . . ?
K802 O815 K801 9.3 . . ?
O855 C816 C856 79.2 . . ?
O855 C816 O815 24.8 . . ?
C856 C816 O815 103.3 . . ?
O855 C816 C817 94.4 . . ?
C856 C816 C817 34.1 . . ?
O815 C816 C817 111.8 . . ?
O855 C816 C857 119.1 . . ?
C856 C816 C857 62.6 . . ?
O815 C816 C857 127.5 . . ?
C817 C816 C857 30.8 . . ?
O855 C816 K802 46.1 . . ?
C856 C816 K802 88.6 . . ?
O815 C816 K802 42.2 . . ?
C817 C816 K802 77.5 . . ?
C857 C816 K802 85.5 . . ?
C856 C817 C857 134.5 . . ?
C856 C817 C816 51.6 . . ?
C857 C817 C816 91.3 . . ?
C856 C817 N800 146.6 . . ?
C857 C817 N800 66.9 . . ?
C816 C817 N800 114.8 . . ?
C856 C817 N840 154.6 . . ?
C857 C817 N840 59.9 . . ?
C816 C817 N840 117.5 . . ?
N800 C817 N840 8.2 . . ?
C856 C817 O855 44.7 . . ?
C857 C817 O855 119.4 . . ?
C816 C817 O855 34.9 . . ?
N800 C817 O855 105.0 . . ?
N840 C817 O855 111.8 . . ?
C856 C817 K802 95.3 . . ?
C857 C817 K802 102.4 . . ?
C816 C817 K802 78.4 . . ?
N800 C817 K802 51.5 . . ?
N840 C817 K802 59.3 . . ?
O855 C817 K802 55.0 . . ?
C841 C818 N840 93.2 . . ?
C841 C818 C819 24.7 . . ?
N840 C818 C819 107.8 . . ?
C841 C818 N800 98.7 . . ?
N840 C818 N800 7.5 . . ?
C819 C818 N800 111.1 . . ?
C841 C818 C842 61.9 . . ?
N840 C818 C842 112.3 . . ?
C819 C818 C842 38.2 . . ?
N800 C818 C842 110.5 . . ?
C841 C818 C857 147.8 . . ?
N840 C818 C857 54.7 . . ?
C819 C818 C857 156.1 . . ?
N800 C818 C857 49.5 . . ?
C842 C818 C857 127.7 . . ?
C841 C819 C842 100.0 . . ?
C841 C819 O820 121.8 . . ?
C842 C819 O820 46.5 . . ?
C841 C819 C818 18.8 . . ?
C842 C819 C818 82.3 . . ?
O820 C819 C818 112.4 . . ?
C841 C819 O843 117.1 . . ?
C842 C819 O843 49.2 . . ?
O820 C819 O843 6.2 . . ?
C818 C819 O843 109.2 . . ?
C842 O820 C819 49.4 . . ?
C842 O820 C821 126.4 . . ?
C819 O820 C821 113.8 . . ?
C842 O820 C844 116.7 . . ?
C819 O820 C844 152.7 . . ?
C821 O820 C844 51.2 . . ?
C842 O820 K801 116.0 . . ?
C819 O820 K801 117.9 . . ?
C821 O820 K801 115.5 . . ?
C844 O820 K801 89.1 . . ?
C842 O820 K802 110.1 . . ?
C819 O820 K802 110.6 . . ?
C821 O820 K802 122.3 . . ?
C844 O820 K802 96.1 . . ?
K801 O820 K802 7.6 . . ?
C844 C821 O820 74.6 . . ?
C844 C821 O843 62.5 . . ?
O820 C821 O843 18.6 . . ?
C844 C821 C822 41.0 . . ?
O820 C821 C822 109.9 . . ?
O843 C821 C822 93.0 . . ?
C845 C822 C844 96.7 . . ?
C845 C822 O823 25.6 . . ?
C844 C822 O823 102.6 . . ?
C845 C822 C821 121.3 . . ?
C844 C822 C821 56.3 . . ?
O823 C822 C821 103.6 . . ?
C845 O823 C822 37.8 . . ?
C845 O823 O846 75.5 . . ?
C822 O823 O846 110.7 . . ?
C845 O823 C824 78.1 . . ?
C822 O823 C824 103.7 . . ?
O846 O823 C824 68.1 . . ?
C845 O823 C844 43.3 . . ?
C822 O823 C844 32.9 . . ?
O846 O823 C844 90.8 . . ?
C824 O823 C844 121.4 . . ?
C845 O823 K801 107.8 . . ?
C822 O823 K801 117.6 . . ?
O846 O823 K801 55.4 . . ?
C824 O823 K801 118.1 . . ?
C844 O823 K801 84.8 . . ?
C845 O823 K802 109.6 . . ?
C822 O823 K802 119.4 . . ?
O846 O823 K802 56.0 . . ?
C824 O823 K802 117.6 . . ?
C844 O823 K802 86.7 . . ?
K801 O823 K802 2.0 . . ?
C847 C824 O823 98.8 . . ?
C847 C824 C845 107.7 . . ?
O823 C824 C845 25.3 . . ?
C847 C824 C825 42.1 . . ?
O823 C824 C825 106.0 . . ?
C845 C824 C825 128.5 . . ?
C847 C824 O846 56.0 . . ?
O823 C824 O846 52.7 . . ?
C845 C824 O846 52.2 . . ?
C825 C824 O846 89.3 . . ?
C847 C825 N809 61.0 . . ?
C847 C825 C824 54.2 . . ?
N809 C825 C824 111.6 . . ?
C847 C825 C848 46.3 . . ?
N809 C825 C848 32.3 . . ?
C824 C825 C848 99.6 . . ?
K801 K802 O815 118.3 . . ?
K801 K802 O803 115.2 . . ?
O815 K802 O803 114.1 . . ?
K801 K802 O806 97.7 . . ?
O815 K802 O806 137.5 . . ?
O803 K802 O806 62.5 . . ?
K801 K802 O860 115.3 . . ?
O815 K802 O860 111.5 . . ?
O803 K802 O860 3.9 . . ?
O806 K802 O860 66.4 . . ?
K801 K802 O846 23.9 . . ?
O815 K802 O846 111.6 . . ?
O803 K802 O846 132.2 . . ?
O806 K802 O846 92.1 . . ?
O860 K802 O846 133.6 . . ?
K801 K802 N800 102.9 . . ?
O815 K802 N800 66.5 . . ?
O803 K802 N800 66.7 . . ?
O806 K802 N800 129.2 . . ?
O860 K802 N800 62.8 . . ?
O846 K802 N800 122.9 . . ?
K801 K802 O812 85.4 . . ?
O815 K802 O812 62.8 . . ?
O803 K802 O812 154.5 . . ?
O806 K802 O812 101.6 . . ?
O860 K802 O812 156.6 . . ?
O846 K802 O812 63.7 . . ?
N800 K802 O812 125.8 . . ?
K801 K802 O852 118.1 . . ?
O815 K802 O852 47.8 . . ?
O803 K802 O852 124.8 . . ?
O806 K802 O852 96.7 . . ?
O860 K802 O852 125.6 . . ?
O846 K802 O852 96.1 . . ?
N800 K802 O852 112.7 . . ?
O812 K802 O852 32.8 . . ?
K801 K802 O855 126.0 . . ?
O815 K802 O855 12.5 . . ?
O803 K802 O855 101.8 . . ?
O806 K802 O855 134.9 . . ?
O860 K802 O855 99.1 . . ?
O846 K802 O855 122.9 . . ?
N800 K802 O855 56.9 . . ?
O812 K802 O855 74.8 . . ?
O852 K802 O855 55.8 . . ?
K801 K802 O843 37.7 . . ?
O815 K802 O843 101.3 . . ?
O803 K802 O843 98.2 . . ?
O806 K802 O843 121.2 . . ?
O860 K802 O843 96.1 . . ?
O846 K802 O843 59.4 . . ?
N800 K802 O843 65.1 . . ?
O812 K802 O843 107.2 . . ?
O852 K802 O843 133.2 . . ?
O855 K802 O843 102.0 . . ?
K801 K802 O863 99.7 . . ?
O815 K802 O863 138.7 . . ?
O803 K802 O863 55.8 . . ?
O806 K802 O863 6.7 . . ?
O860 K802 O863 59.7 . . ?
O846 K802 O863 96.4 . . ?
N800 K802 O863 122.5 . . ?
O812 K802 O863 108.1 . . ?
O852 K802 O863 101.3 . . ?
O855 K802 O863 134.1 . . ?
O843 K802 O863 119.3 . . ?
C818 N840 C858 122.6 . . ?
C818 N840 C857 80.1 . . ?
C858 N840 C857 113.6 . . ?
C818 N840 C801 124.5 . . ?
C858 N840 C801 7.6 . . ?
C857 N840 C801 120.7 . . ?
C818 N840 C841 27.8 . . ?
C858 N840 C841 108.6 . . ?
C857 N840 C841 107.8 . . ?
C801 N840 C841 107.1 . . ?
C818 N840 C817 110.6 . . ?
C858 N840 C817 97.9 . . ?
C857 N840 C817 30.6 . . ?
C801 N840 C817 103.0 . . ?
C841 N840 C817 138.3 . . ?
C818 N840 K802 121.1 . . ?
C858 N840 K802 106.4 . . ?
C857 N840 K802 109.8 . . ?
C801 N840 K802 100.4 . . ?
C841 N840 K802 110.7 . . ?
C817 N840 K802 91.1 . . ?
C818 N840 K801 112.1 . . ?
C858 N840 K801 111.5 . . ?
C857 N840 K801 113.4 . . ?
C801 N840 K801 104.9 . . ?
C841 N840 K801 101.0 . . ?
C817 N840 K801 98.3 . . ?
K802 N840 K801 9.7 . . ?
C818 C841 C819 136.5 . . ?
C818 C841 N840 59.1 . . ?
C819 C841 N840 137.2 . . ?
C818 C841 C842 94.1 . . ?
C819 C841 C842 44.1 . . ?
N840 C841 C842 112.4 . . ?
C818 C841 N800 58.4 . . ?
C819 C841 N800 134.1 . . ?
N840 C841 N800 4.4 . . ?
C842 C841 N800 108.0 . . ?
O820 C842 C819 84.1 . . ?
O820 C842 O843 13.2 . . ?
C819 C842 O843 95.1 . . ?
O820 C842 C841 104.5 . . ?
C819 C842 C841 36.0 . . ?
O843 C842 C841 109.9 . . ?
O820 C842 C818 120.9 . . ?
C819 C842 C818 59.5 . . ?
O843 C842 C818 121.5 . . ?
C841 C842 C818 24.0 . . ?
O820 C842 K801 48.2 . . ?
C819 C842 K801 97.5 . . ?
O843 C842 K801 38.8 . . ?
C841 C842 K801 89.3 . . ?
C818 C842 K801 89.4 . . ?
C842 O843 C821 101.4 . . ?
C842 O843 C844 110.1 . . ?
C821 O843 C844 56.2 . . ?
C842 O843 C819 35.8 . . ?
C821 O843 C819 91.9 . . ?
C844 O843 C819 132.0 . . ?
C842 O843 K801 120.5 . . ?
C821 O843 K801 137.6 . . ?
C844 O843 K801 109.7 . . ?
C819 O843 K801 117.4 . . ?
C842 O843 K802 113.6 . . ?
C821 O843 K802 143.5 . . ?
C844 O843 K802 116.5 . . ?
C819 O843 K802 110.1 . . ?
K801 O843 K802 7.6 . . ?
C822 C844 C821 82.7 . . ?
C822 C844 O843 122.6 . . ?
C821 C844 O843 61.3 . . ?
C822 C844 C845 38.6 . . ?
C821 C844 C845 103.9 . . ?
O843 C844 C845 106.3 . . ?
C822 C844 O820 127.9 . . ?
C821 C844 O820 54.2 . . ?
O843 C844 O820 14.6 . . ?
C845 C844 O820 119.4 . . ?
C822 C844 O823 44.5 . . ?
C821 C844 O823 90.4 . . ?
O843 C844 O823 89.9 . . ?
C845 C844 O823 17.7 . . ?
O820 C844 O823 102.3 . . ?
C822 C844 K801 103.6 . . ?
C821 C844 K801 96.1 . . ?
O843 C844 K801 45.6 . . ?
C845 C844 K801 69.7 . . ?
O820 C844 K801 60.0 . . ?
O823 C844 K801 59.2 . . ?
O823 C845 C822 116.6 . . ?
O823 C845 O846 77.0 . . ?
C822 C845 O846 155.4 . . ?
O823 C845 C844 119.0 . . ?
C822 C845 C844 44.7 . . ?
O846 C845 C844 111.2 . . ?
O823 C845 C824 76.6 . . ?
C822 C845 C824 133.0 . . ?
O846 C845 C824 68.1 . . ?
C844 C845 C824 164.2 . . ?
O823 C845 K801 60.3 . . ?
C822 C845 K801 121.1 . . ?
O846 C845 K801 45.4 . . ?
C844 C845 K801 82.9 . . ?
C824 C845 K801 104.8 . . ?
C845 O846 O823 27.5 . . ?
C845 O846 C847 108.2 . . ?
O823 O846 C847 98.5 . . ?
C845 O846 C824 59.7 . . ?
O823 O846 C824 59.2 . . ?
C847 O846 C824 49.0 . . ?
C845 O846 K801 109.2 . . ?
O823 O846 K801 94.6 . . ?
C847 O846 K801 121.3 . . ?
C824 O846 K801 143.6 . . ?
C845 O846 K802 114.5 . . ?
O823 O846 K802 99.4 . . ?
C847 O846 K802 117.9 . . ?
C824 O846 K802 145.4 . . ?
K801 O846 K802 5.3 . . ?
C825 C847 C824 83.8 . . ?
C825 C847 N809 76.2 . . ?
C824 C847 N809 149.5 . . ?
C825 C847 O846 131.9 . . ?
C824 C847 O846 75.0 . . ?
N809 C847 O846 101.7 . . ?
C825 C847 C848 102.6 . . ?
C824 C847 C848 165.6 . . ?
N809 C847 C848 44.6 . . ?
O846 C847 C848 108.5 . . ?
C825 C847 C810 108.5 . . ?
C824 C847 C810 158.8 . . ?
N809 C847 C810 51.6 . . ?
O846 C847 C810 106.3 . . ?
C848 C847 C810 7.4 . . ?
C825 C847 K801 111.8 . . ?
C824 C847 K801 102.3 . . ?
N809 C847 K801 65.4 . . ?
O846 C847 K801 37.2 . . ?
C848 C847 K801 87.4 . . ?
C810 C847 K801 89.3 . . ?
N809 C848 C847 61.7 . . ?
N809 C848 N849 51.8 . . ?
C847 C848 N849 110.0 . . ?
N809 C848 C811 115.6 . . ?
C847 C848 C811 140.9 . . ?
N849 C848 C811 66.6 . . ?
N809 C848 C825 48.2 . . ?
C847 C848 C825 31.0 . . ?
N849 C848 C825 99.4 . . ?
C811 C848 C825 162.0 . . ?
N809 C848 K801 51.3 . . ?
C847 C848 K801 67.8 . . ?
N849 C848 K801 55.8 . . ?
C811 C848 K801 81.1 . . ?
C825 C848 K801 81.5 . . ?
N809 N849 C808 63.6 . . ?
N809 N849 C850 150.3 . . ?
C808 N849 C850 119.6 . . ?
N809 N849 C865 82.5 . . ?
C808 N849 C865 21.8 . . ?
C850 N849 C865 108.9 . . ?
N809 N849 C848 43.3 . . ?
C808 N849 C848 90.6 . . ?
C850 N849 C848 108.1 . . ?
C865 N849 C848 112.3 . . ?
N809 N849 C810 57.3 . . ?
C808 N849 C810 99.5 . . ?
C850 N849 C810 94.3 . . ?
C865 N849 C810 120.6 . . ?
C848 N849 C810 13.9 . . ?
N809 N849 C811 105.0 . . ?
C808 N849 C811 142.4 . . ?
C850 N849 C811 52.8 . . ?
C865 N849 C811 152.4 . . ?
C848 N849 C811 63.9 . . ?
C810 N849 C811 51.1 . . ?
N809 N849 K801 79.1 . . ?
C808 N849 K801 113.2 . . ?
C850 N849 K801 119.7 . . ?
C865 N849 K801 109.4 . . ?
C848 N849 K801 98.0 . . ?
C810 N849 K801 103.9 . . ?
C811 N849 K801 98.2 . . ?
N809 N849 K802 89.1 . . ?
C808 N849 K802 116.5 . . ?
C850 N849 K802 111.5 . . ?
C865 N849 K802 108.7 . . ?
C848 N849 K802 107.2 . . ?
C810 N849 K802 111.9 . . ?
C811 N849 K802 98.0 . . ?
K801 N849 K802 10.3 . . ?
N849 C850 C851 113.3 . . ?
N849 C850 C811 78.2 . . ?
C851 C850 C811 51.8 . . ?
C811 C851 O852 115.9 . . ?
C811 C851 C850 64.5 . . ?
O852 C851 C850 109.3 . . ?
C811 C851 C813 105.8 . . ?
O852 C851 C813 48.3 . . ?
C850 C851 C813 151.2 . . ?
C811 C851 O812 57.1 . . ?
O852 C851 O812 62.7 . . ?
C850 C851 O812 100.2 . . ?
C813 C851 O812 55.6 . . ?
C813 O852 C853 48.5 . . ?
C813 O852 C851 71.5 . . ?
C853 O852 C851 112.5 . . ?
C813 O852 O812 61.8 . . ?
C853 O852 O812 102.9 . . ?
C851 O852 O812 63.6 . . ?
C813 O852 K802 121.3 . . ?
C853 O852 K802 116.3 . . ?
C851 O852 K802 120.1 . . ?
O812 O852 K802 73.4 . . ?
C813 O852 K801 114.4 . . ?
C853 O852 K801 116.7 . . ?
C851 O852 K801 114.0 . . ?
O812 O852 K801 64.7 . . ?
K802 O852 K801 8.7 . . ?
C813 C853 C814 91.2 . . ?
C813 C853 C854 158.2 . . ?
C814 C853 C854 73.1 . . ?
C813 C853 O852 60.2 . . ?
C814 C853 O852 113.2 . . ?
C854 C853 O852 111.7 . . ?
C813 C853 O815 113.0 . . ?
C814 C853 O815 49.0 . . ?
C854 C853 O815 45.3 . . ?
O852 C853 O815 86.2 . . ?
O815 C854 C853 89.3 . . ?
O815 C854 O855 28.1 . . ?
C853 C854 O855 116.8 . . ?
O815 C854 C814 60.2 . . ?
C853 C854 C814 47.3 . . ?
O855 C854 C814 85.6 . . ?
O815 O855 C816 110.5 . . ?
O815 O855 C854 74.5 . . ?
C816 O855 C854 118.0 . . ?
O815 O855 C856 159.5 . . ?
C816 O855 C856 52.5 . . ?
C854 O855 C856 121.9 . . ?
O815 O855 C817 138.2 . . ?
C816 O855 C817 50.7 . . ?
C854 O855 C817 145.8 . . ?
C856 O855 C817 23.9 . . ?
O815 O855 C814 32.1 . . ?
C816 O855 C814 101.5 . . ?
C854 O855 C814 50.1 . . ?
C856 O855 C814 148.8 . . ?
C817 O855 C814 150.3 . . ?
O815 O855 K802 61.9 . . ?
C816 O855 K802 118.1 . . ?
C854 O855 K802 117.4 . . ?
C856 O855 K802 113.0 . . ?
C817 O855 K802 92.5 . . ?
C814 O855 K802 93.6 . . ?
O815 O855 K801 57.8 . . ?
C816 O855 K801 112.4 . . ?
C854 O855 K801 119.5 . . ?
C856 O855 K801 114.5 . . ?
C817 O855 K801 92.4 . . ?
C814 O855 K801 89.9 . . ?
K802 O855 K801 7.8 . . ?
C817 C856 C816 94.3 . . ?
C817 C856 O855 111.4 . . ?
C816 C856 O855 48.3 . . ?
C817 C856 C857 23.6 . . ?
C816 C856 C857 77.0 . . ?
O855 C856 C857 109.2 . . ?
C817 C857 N800 78.5 . . ?
C817 C857 N840 89.4 . . ?
N800 C857 N840 11.9 . . ?
C817 C857 C856 21.9 . . ?
N800 C857 C856 97.3 . . ?
N840 C857 C856 108.9 . . ?
C817 C857 C816 57.9 . . ?
N800 C857 C816 105.4 . . ?
N840 C857 C816 115.8 . . ?
C856 C857 C816 40.5 . . ?
C817 C857 C818 134.5 . . ?
N800 C857 C818 56.0 . . ?
N840 C857 C818 45.3 . . ?
C856 C857 C818 151.2 . . ?
C816 C857 C818 129.8 . . ?
N840 C858 C859 114.5 . . ?
N840 C858 N800 11.8 . . ?
C859 C858 N800 114.0 . . ?
N840 C858 C802 116.8 . . ?
C859 C858 C802 50.3 . . ?
N800 C858 C802 106.8 . . ?
C801 C859 C802 69.8 . . ?
C801 C859 O860 109.8 . . ?
C802 C859 O860 55.0 . . ?
C801 C859 C858 2.5 . . ?
C802 C859 C858 69.4 . . ?
O860 C859 C858 111.0 . . ?
C801 C859 O803 111.3 . . ?
C802 C859 O803 58.2 . . ?
O860 C859 O803 3.3 . . ?
C858 C859 O803 112.6 . . ?
C801 C859 K802 80.3 . . ?
C802 C859 K802 71.8 . . ?
O860 C859 K802 45.7 . . ?
C858 C859 K802 82.6 . . ?
O803 C859 K802 44.4 . . ?
C802 O860 C859 58.1 . . ?
C802 O860 C861 129.2 . . ?
C859 O860 C861 112.4 . . ?
C802 O860 C804 112.8 . . ?
C859 O860 C804 144.6 . . ?
C861 O860 C804 43.1 . . ?
C802 O860 K802 108.7 . . ?
C859 O860 K802 112.7 . . ?
C861 O860 K802 119.2 . . ?
C804 O860 K802 102.7 . . ?
C802 O860 K801 113.9 . . ?
C859 O860 K801 108.3 . . ?
C861 O860 K801 116.0 . . ?
C804 O860 K801 106.3 . . ?
K802 O860 K801 9.1 . . ?
C804 C861 O803 65.2 . . ?
C804 C861 O860 69.1 . . ?
O803 C861 O860 8.0 . . ?
C804 C861 C862 46.2 . . ?
O803 C861 C862 97.4 . . ?
O860 C861 C862 104.4 . . ?
C804 C861 C805 69.0 . . ?
O803 C861 C805 104.6 . . ?
O860 C861 C805 112.5 . . ?
C862 C861 C805 24.6 . . ?
C805 C862 C804 132.9 . . ?
C805 C862 O863 47.8 . . ?
C804 C862 O863 118.1 . . ?
C805 C862 C861 92.3 . . ?
C804 C862 C861 46.7 . . ?
O863 C862 C861 111.6 . . ?
C805 C862 O806 53.3 . . ?
C804 C862 O806 115.7 . . ?
O863 C862 O806 5.5 . . ?
C861 C862 O806 114.0 . . ?
C805 O863 C862 27.9 . . ?
C805 O863 C864 115.3 . . ?
C862 O863 C864 111.8 . . ?
C805 O863 C807 121.7 . . ?
C862 O863 C807 141.3 . . ?
C864 O863 C807 47.1 . . ?
C805 O863 K802 124.4 . . ?
C862 O863 K802 109.4 . . ?
C864 O863 K802 115.1 . . ?
C807 O863 K802 109.2 . . ?
C805 O863 K801 126.8 . . ?
C862 O863 K801 116.1 . . ?
C864 O863 K801 116.3 . . ?
C807 O863 K801 102.5 . . ?
K802 O863 K801 10.0 . . ?
C807 C864 O806 68.8 . . ?
C807 C864 O863 73.5 . . ?
O806 C864 O863 14.1 . . ?
C807 C864 C865 49.9 . . ?
O806 C864 C865 91.9 . . ?
O863 C864 C865 104.4 . . ?
C807 C864 C808 45.1 . . ?
O806 C864 C808 88.5 . . ?
O863 C864 C808 100.5 . . ?
C865 C864 C808 4.9 . . ?
C808 C865 C807 107.8 . . ?
C808 C865 N849 70.6 . . ?
C807 C865 N849 130.5 . . ?
C808 C865 C864 161.48(8) . . ?
C807 C865 C864 54.1 . . ?
N849 C865 C864 116.4 . . ?
C808 C865 N809 35.9 . . ?
C807 C865 N809 106.5 . . ?
N849 C865 N809 43.4 . . ?
C864 C865 N809 137.9 . . ?
N900 C901 C902 122.8(33) . . ?
N903 C902 C901 102.2(31) . . ?
N910 C911 C912 85.1(30) . . ?
N913 C912 C911 93.1(31) . . ?
 
_refine_diff_density_max    2.982
_refine_diff_density_min   -2.989
_refine_diff_density_rms    0.255

#===END

data_Pb9W(CO)34-
 
_audit_creation_method            SHELXL
_chemical_name_systematic
;
  ?
;
_chemical_name_common             ?
_chemical_formula_moiety          ?
_chemical_formula_structural      ?
_chemical_formula_analytical      ?
_chemical_formula_sum             'C87 H180 K4 N17 O30 Pb9 W2'
_chemical_formula_weight          4333.29
_chemical_melting_point           ?
_chemical_compound_source         ?
 
loop_
  _atom_type_symbol
  _atom_type_description
  _atom_type_scat_dispersion_real
  _atom_type_scat_dispersion_imag
  _atom_type_scat_source
  'C'  'C'   0.0033   0.0016
  'International Tables Vol C Tables 4.2.6.8 and 6.1.1.4'
  'H'  'H'   0.0000   0.0000
  'International Tables Vol C Tables 4.2.6.8 and 6.1.1.4'
  'N'  'N'   0.0061   0.0033
  'International Tables Vol C Tables 4.2.6.8 and 6.1.1.4'
  'O'  'O'   0.0106   0.0060
  'International Tables Vol C Tables 4.2.6.8 and 6.1.1.4'
  'K'  'K'   0.2009   0.2494
  'International Tables Vol C Tables 4.2.6.8 and 6.1.1.4'
  'W'  'W'  -0.8490   6.8722
  'International Tables Vol C Tables 4.2.6.8 and 6.1.1.4'
  'Pb'  'Pb'  -3.3944  10.1111
  'International Tables Vol C Tables 4.2.6.8 and 6.1.1.4'
 
_symmetry_cell_setting            ?
_symmetry_space_group_name_H-M    ?
 
loop_
  _symmetry_equiv_pos_as_xyz
  'x, y, z'
  '-x, -y, -z'
 
_cell_length_a                    16.283(4)
_cell_length_b                    17.094(3)
_cell_length_c                    24.872(6)
_cell_angle_alpha                 71.62(2)
_cell_angle_beta                  82.91(2)
_cell_angle_gamma                 81.35(2)
_cell_volume                      6473.9(24)
_cell_formula_units_Z             2
_cell_measurement_temperature     120(2)
_cell_measurement_reflns_used     ?
_cell_measurement_theta_min       ?
_cell_measurement_theta_max       ?
 
_exptl_crystal_description        ?
_exptl_crystal_colour             ?
_exptl_crystal_size_max           ?
_exptl_crystal_size_mid           ?
_exptl_crystal_size_min           ?
_exptl_crystal_density_meas       ?
_exptl_crystal_density_diffrn     2.223
_exptl_crystal_density_method     ?
_exptl_crystal_F_000              4046
_exptl_absorpt_coefficient_mu     13.621
_exptl_absorpt_correction_type    ?
_exptl_absorpt_correction_T_min   ?
_exptl_absorpt_correction_T_max   ?
 
_exptl_special_details
;
  ?
;
 
_diffrn_ambient_temperature       120(2)
_diffrn_radiation_wavelength      0.71073
_diffrn_radiation_type            MoK\a
_diffrn_radiation_source          'fine-focus sealed tube'
_diffrn_radiation_monochromator   graphite
_diffrn_measurement_device        ?
_diffrn_measurement_method        ?
_diffrn_standards_number          ?
_diffrn_standards_interval_count  ?
_diffrn_standards_interval_time   ?
_diffrn_standards_decay_%         ?
_diffrn_reflns_number             69158
_diffrn_reflns_av_R_equivalents   0.1803
_diffrn_reflns_av_sigmaI/netI     0.1528
_diffrn_reflns_limit_h_min        -20
_diffrn_reflns_limit_h_max        20
_diffrn_reflns_limit_k_min        -18
_diffrn_reflns_limit_k_max        19
_diffrn_reflns_limit_l_min        -30
_diffrn_reflns_limit_l_max        30
_diffrn_reflns_theta_min          2.52
_diffrn_reflns_theta_max          25.95
_reflns_number_total              23480
_reflns_number_observed           17703
_reflns_observed_criterion        >2sigma(I)
 
_computing_data_collection        ?
_computing_cell_refinement        ?
_computing_data_reduction         ?
_computing_structure_solution     'SHELXS-86 (Sheldrick, 1990)'
_computing_structure_refinement   'SHELXL-93 (Sheldrick, 1993)'
_computing_molecular_graphics     ?
_computing_publication_material   ?
 
_refine_special_details
;
  Refinement on F^2^ for ALL reflections except for 95 with very negative F^2^
  or flagged by the user for potential systematic errors.  Weighted R-factors
  wR and all goodnesses of fit S are based on F^2^, conventional R-factors R
  are based on F, with F set to zero for negative F^2^. The observed criterion
  of F^2^ > 2sigma(F^2^) is used only for calculating _R_factor_obs etc. and is
  not relevant to the choice of reflections for refinement.  R-factors based
  on F^2^ are statistically about twice as large as those based on F, and R-
  factors based on ALL data will be even larger.
;
 
_refine_ls_structure_factor_coef  Fsqd
_refine_ls_matrix_type            full
_refine_ls_weighting_scheme
  'calc w=1/[\s^2^(Fo^2^)+(0.0567P)^2^+0.0000P] where P=(Fo^2^+2Fc^2^)/3'
_atom_sites_solution_primary      direct
_atom_sites_solution_secondary    difmap
_atom_sites_solution_hydrogens    geom
_refine_ls_hydrogen_treatment     ?
_refine_ls_extinction_method      none
_refine_ls_extinction_coef        ?
_refine_ls_number_reflns          23385
_refine_ls_number_parameters      1342
_refine_ls_number_restraints      804
_refine_ls_R_factor_all           0.0696
_refine_ls_R_factor_obs           0.0544
_refine_ls_wR_factor_all          0.1312
_refine_ls_wR_factor_obs          0.1227
_refine_ls_goodness_of_fit_all    1.006
_refine_ls_goodness_of_fit_obs    1.096
_refine_ls_restrained_S_all       1.005
_refine_ls_restrained_S_obs       1.085
_refine_ls_shift/esd_max          -0.045
_refine_ls_shift/esd_mean         0.001
 
loop_
  _atom_site_label
  _atom_site_type_symbol
  _atom_site_fract_x
  _atom_site_fract_y
  _atom_site_fract_z
  _atom_site_U_iso_or_equiv
  _atom_site_thermal_displace_type
  _atom_site_occupancy
  _atom_site_calc_flag
  _atom_site_refinement_flags
  _atom_site_disorder_group
Pb1 Pb 0.81354(2) 0.30541(3) 0.40068(2) 0.02910(13) Uani 1 d . .
Pb2 Pb 0.75732(2) 0.42987(3) 0.29079(2) 0.01990(11) Uani 1 d . .
Pb3 Pb 0.86893(2) 0.24985(3) 0.29514(2) 0.02145(12) Uani 1 d . .
Pb4 Pb 0.73816(2) 0.15225(3) 0.39830(2) 0.02490(12) Uani 1 d . .
Pb5 Pb 0.62555(2) 0.33164(3) 0.39465(2) 0.01964(11) Uani 1 d . .
Pb6 Pb 0.58248(2) 0.39779(3) 0.26982(2) 0.01625(10) Uani 1 d . .
Pb7 Pb 0.75393(2) 0.34129(3) 0.19914(2) 0.01729(11) Uani 1 d . .
Pb8 Pb 0.73278(2) 0.15218(3) 0.27227(2) 0.01791(11) Uani 1 d . .
Pb9 Pb 0.57028(2) 0.20747(3) 0.34021(2) 0.01797(11) Uani 1 d . .
W10 W 0.59263(2) 0.26997(3) 0.20958(2) 0.01465(11) Uani 1 d . .
C11 C 0.4769(6) 0.2497(8) 0.2193(6) 0.022(3) Uani 1 d U .
O11 O 0.4055(4) 0.2394(5) 0.2234(4) 0.023(2) Uani 1 d U .
C12 C 0.6271(6) 0.2042(7) 0.1586(5) 0.016(2) Uani 1 d U .
O12 O 0.6498(5) 0.1638(6) 0.1274(4) 0.028(2) Uani 1 d U .
C13 C 0.5717(6) 0.3636(7) 0.1427(5) 0.018(2) Uani 1 d U .
O13 O 0.5576(4) 0.4209(6) 0.1027(4) 0.030(2) Uani 1 d U .
W2 W 0.99263(2) -0.06811(3) 0.24532(2) 0.01599(11) Uani 1 d . .
C1 C 1.0752(6) -0.0710(8) 0.1840(6) 0.025(3) Uani 1 d U .
O1 O 1.1281(5) -0.0727(7) 0.1457(4) 0.039(3) Uani 1 d U .
C2 C 0.9249(5) -0.1248(7) 0.2145(5) 0.013(2) Uani 1 d U .
O2 O 0.8839(5) -0.1606(6) 0.1954(4) 0.033(2) Uani 1 d U .
C3 C 1.0471(5) -0.1763(8) 0.2844(5) 0.019(2) Uani 1 d U .
O3 O 1.0836(4) -0.2421(5) 0.3052(4) 0.027(2) Uani 1 d U .
N1 N 0.9334(5) 0.0645(6) 0.2039(5) 0.021(2) Uani 1 d U .
H1A H 0.8773(5) 0.0654(6) 0.2149(5) 0.026 Uiso 1 calc R .
H1B H 0.9536(5) 0.0978(6) 0.2207(5) 0.026 Uiso 1 calc R .
C4 C 0.9406(8) 0.1067(10) 0.1424(7) 0.039(3) Uani 1 d U .
H4C H 0.9997(8) 0.1137(10) 0.1295(7) 0.047 Uiso 1 calc R .
H4D H 0.9085(8) 0.1626(10) 0.1345(7) 0.047 Uiso 1 calc R .
C5 C 0.9073(9) 0.0568(12) 0.1082(8) 0.058(5) Uani 1 d U .
H5A H 0.9147(9) 0.0865(12) 0.0670(8) 0.069 Uiso 1 calc R .
H5B H 0.9403(9) 0.0015(12) 0.1152(8) 0.069 Uiso 1 calc R .
N2 N 0.8198(7) 0.0463(9) 0.1240(7) 0.058(4) Uani 1 d U .
H2A H 0.7923(7) 0.0671(9) 0.1501(7) 0.070 Uiso 1 calc R .
H2B H 0.7943(7) 0.0193(9) 0.1075(7) 0.070 Uiso 1 calc R .
N3 N 1.0579(5) 0.0006(6) 0.2903(4) 0.019(2) Uani 1 d U .
H3A H 1.1033(5) -0.0336(6) 0.3065(4) 0.023 Uiso 1 calc R .
H3B H 1.0770(5) 0.0466(6) 0.2638(4) 0.023 Uiso 1 calc R .
C6 C 1.0030(6) 0.0272(8) 0.3349(5) 0.025(3) Uani 1 d U .
H6A H 0.9710(6) 0.0816(8) 0.3175(5) 0.030 Uiso 1 calc R .
H6B H 1.0373(6) 0.0338(8) 0.3630(5) 0.030 Uiso 1 calc R .
C7 C 0.9443(6) -0.0352(8) 0.3640(6) 0.028(3) Uani 1 d U .
H7A H 0.9030(6) -0.0137(8) 0.3902(6) 0.033 Uiso 1 calc R .
H7B H 0.9753(6) -0.0873(8) 0.3864(6) 0.033 Uiso 1 calc R .
N4 N 0.9009(5) -0.0511(6) 0.3193(4) 0.021(2) Uani 1 d U .
H4A H 0.8610(5) -0.0072(6) 0.3059(4) 0.025 Uiso 1 calc R .
H4B H 0.8746(5) -0.0981(6) 0.3352(4) 0.025 Uiso 1 calc R .
K1 K 0.48091(11) 0.81776(15) 0.31117(11) 0.0149(5) Uani 1 d . .
N100 N 0.4471(5) 0.9990(6) 0.2823(4) 0.020(2) Uani 1 d U .
C101 C 0.4906(6) 1.0363(8) 0.2261(6) 0.023(3) Uani 1 d U .
H10A H 0.4881(6) 1.0968(8) 0.2194(6) 0.028 Uiso 1 calc R .
H10B H 0.4608(6) 1.0280(8) 0.1964(6) 0.028 Uiso 1 calc R .
C102 C 0.5795(6) 1.0009(7) 0.2204(6) 0.023(3) Uani 1 d U .
H10C H 0.6063(6) 1.0313(7) 0.1833(6) 0.028 Uiso 1 calc R .
H10D H 0.6098(6) 1.0066(7) 0.2509(6) 0.028 Uiso 1 calc R .
O103 O 0.5831(4) 0.9137(5) 0.2246(3) 0.017(2) Uani 1 d U .
C104 C 0.6657(5) 0.8806(8) 0.2101(5) 0.022(3) Uani 1 d U .
H10E H 0.7040(5) 0.8845(8) 0.2368(5) 0.027 Uiso 1 calc R .
H10F H 0.6850(5) 0.9131(8) 0.1712(5) 0.027 Uiso 1 calc R .
C105 C 0.6664(6) 0.7927(8) 0.2128(5) 0.022(3) Uani 1 d U .
H10G H 0.6333(6) 0.7893(8) 0.1829(5) 0.027 Uiso 1 calc R .
H10H H 0.7243(6) 0.7680(8) 0.2061(5) 0.027 Uiso 1 calc R .
O106 O 0.6318(4) 0.7478(5) 0.2674(3) 0.018(2) Uani 1 d U .
C107 C 0.6430(6) 0.6605(8) 0.2753(6) 0.024(3) Uani 1 d U .
H10I H 0.7033(6) 0.6407(8) 0.2729(6) 0.028 Uiso 1 calc R .
H10J H 0.6178(6) 0.6492(8) 0.2446(6) 0.028 Uiso 1 calc R .
C108 C 0.6035(6) 0.6145(7) 0.3315(5) 0.020(3) Uani 1 d U .
H10K H 0.6314(6) 0.6237(7) 0.3619(5) 0.024 Uiso 1 calc R .
H10L H 0.6132(6) 0.5544(7) 0.3357(5) 0.024 Uiso 1 calc R .
N109 N 0.5121(5) 0.6391(6) 0.3401(4) 0.018(2) Uani 1 d U .
C110 C 0.4834(6) 0.5984(8) 0.3998(6) 0.024(3) Uani 1 d U .
H11A H 0.5026(6) 0.5382(8) 0.4095(6) 0.029 Uiso 1 calc R .
H11B H 0.4217(6) 0.6052(8) 0.4038(6) 0.029 Uiso 1 calc R .
C111 C 0.5152(6) 0.6337(8) 0.4416(6) 0.026(3) Uani 1 d U .
H11C H 0.4923(6) 0.6063(8) 0.4807(6) 0.032 Uiso 1 calc R .
H11D H 0.5768(6) 0.6227(8) 0.4404(6) 0.032 Uiso 1 calc R .
O112 O 0.4906(4) 0.7196(5) 0.4272(4) 0.019(2) Uani 1 d U .
C113 C 0.5233(6) 0.7573(8) 0.4618(6) 0.022(3) Uani 1 d U .
H11E H 0.5839(6) 0.7589(8) 0.4518(6) 0.026 Uiso 1 calc R .
H11F H 0.5150(6) 0.7241(8) 0.5022(6) 0.026 Uiso 1 calc R .
C114 C 0.4815(6) 0.8427(8) 0.4540(6) 0.031(3) Uani 1 d U .
H11G H 0.4208(6) 0.8415(8) 0.4638(6) 0.037 Uiso 1 calc R .
H11H H 0.5033(6) 0.8677(8) 0.4794(6) 0.037 Uiso 1 calc R .
O115 O 0.4966(4) 0.8913(5) 0.3962(4) 0.020(2) Uani 1 d U .
C116 C 0.4569(7) 0.9760(8) 0.3864(6) 0.030(3) Uani 1 d U .
H11I H 0.4769(7) 1.0014(8) 0.4123(6) 0.035 Uiso 1 calc R .
H11J H 0.3958(7) 0.9764(8) 0.3940(6) 0.035 Uiso 1 calc R .
C117 C 0.4780(7) 1.0245(8) 0.3261(6) 0.025(3) Uani 1 d U .
H11K H 0.4560(7) 1.0834(8) 0.3211(6) 0.030 Uiso 1 calc R .
H11P H 0.5394(7) 1.0216(8) 0.3195(6) 0.030 Uiso 1 calc R .
C118 C 0.3569(6) 1.0270(8) 0.2802(6) 0.025(3) Uani 1 d U .
H11L H 0.3487(6) 1.0881(8) 0.2630(6) 0.030 Uiso 1 calc R .
H11M H 0.3302(6) 1.0140(8) 0.3195(6) 0.030 Uiso 1 calc R .
C119 C 0.3139(6) 0.9869(8) 0.2462(6) 0.024(3) Uani 1 d U .
H11N H 0.2544(6) 1.0097(8) 0.2447(6) 0.028 Uiso 1 calc R .
H11O H 0.3401(6) 0.9993(8) 0.2069(6) 0.028 Uiso 1 calc R .
O120 O 0.3212(4) 0.8988(5) 0.2729(4) 0.024(2) Uani 1 d U .
C121 C 0.2785(6) 0.8591(8) 0.2440(6) 0.029(3) Uani 1 d U .
H12A H 0.3031(6) 0.8693(8) 0.2043(6) 0.035 Uiso 1 calc R .
H12B H 0.2191(6) 0.8827(8) 0.2430(6) 0.035 Uiso 1 calc R .
C122 C 0.2848(6) 0.7684(8) 0.2733(6) 0.032(3) Uani 1 d U .
H12C H 0.2609(6) 0.7580(8) 0.3132(6) 0.038 Uiso 1 calc R .
H12D H 0.2529(6) 0.7416(8) 0.2541(6) 0.038 Uiso 1 calc R .
O123 O 0.3710(4) 0.7341(5) 0.2721(4) 0.022(2) Uani 1 d U .
C124 C 0.3781(6) 0.6460(7) 0.2981(6) 0.023(3) Uani 1 d U .
H12E H 0.3512(6) 0.6201(7) 0.2754(6) 0.028 Uiso 1 calc R .
H12F H 0.3489(6) 0.6331(7) 0.3367(6) 0.028 Uiso 1 calc R .
C125 C 0.4680(6) 0.6108(8) 0.3019(6) 0.027(3) Uani 1 d U .
H12G H 0.4715(6) 0.5494(8) 0.3157(6) 0.032 Uiso 1 calc R .
H12H H 0.4969(6) 0.6265(8) 0.2633(6) 0.032 Uiso 1 calc R .
K2 K 0.16181(11) 0.5516(2) 0.11857(11) 0.0179(5) Uani 1 d . .
N200 N 0.2366(5) 0.5199(7) 0.0114(5) 0.028(2) Uani 1 d U .
C201 C 0.3017(7) 0.4492(9) 0.0257(6) 0.032(3) Uani 1 d U .
H20A H 0.3344(7) 0.4453(9) -0.0098(6) 0.038 Uiso 1 calc R .
H20B H 0.2746(7) 0.3978(9) 0.0423(6) 0.038 Uiso 1 calc R .
C202 C 0.3608(6) 0.4530(9) 0.0666(6) 0.031(3) Uani 1 d U .
H20C H 0.4039(6) 0.4043(9) 0.0728(6) 0.037 Uiso 1 calc R .
H20D H 0.3890(6) 0.5039(9) 0.0507(6) 0.037 Uiso 1 calc R .
O203 O 0.3148(4) 0.4536(5) 0.1195(4) 0.021(2) Uani 1 d U .
C204 C 0.3702(6) 0.4554(8) 0.1592(5) 0.021(3) Uani 1 d U .
H20E H 0.3945(6) 0.5086(8) 0.1459(5) 0.025 Uiso 1 calc R .
H20F H 0.4163(6) 0.4098(8) 0.1619(5) 0.025 Uiso 1 calc R .
C205 C 0.3240(6) 0.4460(8) 0.2168(5) 0.023(3) Uani 1 d U .
H20G H 0.3003(6) 0.3924(8) 0.2301(5) 0.028 Uiso 1 calc R .
H20H H 0.3634(6) 0.4452(8) 0.2443(5) 0.028 Uiso 1 calc R .
O206 O 0.2592(4) 0.5116(5) 0.2149(4) 0.025(2) Uani 1 d U .
C207 C 0.2157(6) 0.5032(9) 0.2684(6) 0.029(3) Uani 1 d U .
H20I H 0.2551(6) 0.5018(9) 0.2962(6) 0.035 Uiso 1 calc R .
H20J H 0.1912(6) 0.4501(9) 0.2815(6) 0.035 Uiso 1 calc R .
C208 C 0.1493(7) 0.5720(9) 0.2663(7) 0.035(3) Uani 1 d U .
H20K H 0.1740(7) 0.6250(9) 0.2527(7) 0.041 Uiso 1 calc R .
H20L H 0.1228(7) 0.5664(9) 0.3051(7) 0.041 Uiso 1 calc R .
N209 N 0.0844(5) 0.5749(7) 0.2283(5) 0.029(3) Uani 1 d U .
C210 C 0.0341(7) 0.6569(9) 0.2146(6) 0.032(3) Uani 1 d U .
H21A H 0.0169(7) 0.6711(9) 0.2502(6) 0.038 Uiso 1 calc R .
H21B H -0.0171(7) 0.6532(9) 0.1982(6) 0.038 Uiso 1 calc R .
C211 C 0.0785(8) 0.7262(10) 0.1734(7) 0.042(4) Uani 1 d U .
H21C H 0.0436(8) 0.7800(10) 0.1698(7) 0.051 Uiso 1 calc R .
H21D H 0.1317(8) 0.7283(10) 0.1880(7) 0.051 Uiso 1 calc R .
O212 O 0.0948(5) 0.7124(6) 0.1183(4) 0.037(2) Uani 1 d U .
C213 C 0.1379(8) 0.7764(10) 0.0771(7) 0.041(4) Uani 1 d U .
H21E H 0.1931(8) 0.7765(10) 0.0898(7) 0.050 Uiso 1 calc R .
H21F H 0.1056(8) 0.8313(10) 0.0740(7) 0.050 Uiso 1 calc R .
C214 C 0.1485(8) 0.7620(11) 0.0214(8) 0.049(4) Uani 1 d U .
H21G H 0.0935(8) 0.7592(11) 0.0096(8) 0.058 Uiso 1 calc R .
H21H H 0.1736(8) 0.8088(11) -0.0072(8) 0.058 Uiso 1 calc R .
O215 O 0.2014(4) 0.6858(6) 0.0241(4) 0.033(2) Uani 1 d U .
C216 C 0.2194(8) 0.6744(10) -0.0296(7) 0.038(3) Uani 1 d U .
H21I H 0.2477(8) 0.7213(10) -0.0554(7) 0.046 Uiso 1 calc R .
H21J H 0.1668(8) 0.6741(10) -0.0456(7) 0.046 Uiso 1 calc R .
C217 C 0.2727(7) 0.5964(10) -0.0262(7) 0.039(3) Uani 1 d U .
H21K H 0.3262(7) 0.5989(10) -0.0122(7) 0.047 Uiso 1 calc R .
H21L H 0.2849(7) 0.5913(10) -0.0651(7) 0.047 Uiso 1 calc R .
C218 C 0.1736(7) 0.5022(10) -0.0188(7) 0.043(4) Uani 1 d U .
H21M H 0.2019(7) 0.4828(10) -0.0507(7) 0.051 Uiso 1 calc R .
H21N H 0.1373(7) 0.5542(10) -0.0351(7) 0.051 Uiso 1 calc R .
C219 C 0.1193(7) 0.4368(9) 0.0188(6) 0.034(3) Uani 1 d U .
H21O H 0.0798(7) 0.4253(9) -0.0043(6) 0.040 Uiso 1 calc R .
H21P H 0.1546(7) 0.3843(9) 0.0360(6) 0.040 Uiso 1 calc R .
O220 O 0.0751(4) 0.4676(6) 0.0617(4) 0.029(2) Uani 1 d U .
C221 C 0.0281(7) 0.4065(9) 0.1003(6) 0.036(3) Uani 1 d U .
H22A H 0.0666(7) 0.3588(9) 0.1208(6) 0.043 Uiso 1 calc R .
H22B H -0.0069(7) 0.3863(9) 0.0789(6) 0.043 Uiso 1 calc R .
C222 C -0.0258(7) 0.4411(9) 0.1419(6) 0.030(3) Uani 1 d U .
H22C H -0.0641(7) 0.4892(9) 0.1217(6) 0.036 Uiso 1 calc R .
H22D H -0.0596(7) 0.3985(9) 0.1675(6) 0.036 Uiso 1 calc R .
O223 O 0.0262(4) 0.4666(5) 0.1743(4) 0.022(2) Uani 1 d U .
C224 C -0.0245(7) 0.4939(9) 0.2169(6) 0.037(3) Uani 1 d U .
H22E H -0.0598(7) 0.4505(9) 0.2393(6) 0.044 Uiso 1 calc R .
H22F H -0.0615(7) 0.5447(9) 0.1990(6) 0.044 Uiso 1 calc R .
C225 C 0.0299(7) 0.5120(9) 0.2556(6) 0.034(3) Uani 1 d U .
H22G H -0.0066(7) 0.5294(9) 0.2857(6) 0.041 Uiso 1 calc R .
H22H H 0.0645(7) 0.4598(9) 0.2744(6) 0.041 Uiso 1 calc R .
K3 K 0.79268(12) -0.2870(2) 0.49281(11) 0.0178(5) Uani 1 d . .
N300 N 0.8680(5) -0.3649(6) 0.4013(4) 0.021(2) Uani 1 d U .
C301 C 0.9535(7) -0.4063(9) 0.4141(7) 0.038(3) Uani 1 d U .
H30A H 0.9833(7) -0.4160(9) 0.3792(7) 0.045 Uiso 1 calc R .
H30B H 0.9495(7) -0.4610(9) 0.4430(7) 0.045 Uiso 1 calc R .
C302 C 1.0028(7) -0.3569(10) 0.4353(7) 0.039(3) Uani 1 d U .
H30C H 1.0608(7) -0.3840(10) 0.4397(7) 0.046 Uiso 1 calc R .
H30D H 1.0041(7) -0.3004(10) 0.4082(7) 0.046 Uiso 1 calc R .
O303 O 0.9637(5) -0.3530(8) 0.4877(5) 0.054(3) Uani 1 d U .
C304 C 1.0104(12) -0.2942(16) 0.5099(11) 0.087(6) Uani 1 d U .
H30E H 0.9939(12) -0.2343(16) 0.4915(11) 0.105 Uiso 1 calc R .
H30F H 1.0718(12) -0.3070(16) 0.5068(11) 0.105 Uiso 1 calc R .
C305 C 0.9686(15) -0.3276(20) 0.5749(14) 0.120(9) Uani 1 d U .
H30G H 1.0037(15) -0.3270(20) 0.6045(14) 0.144 Uiso 1 calc R .
H30H H 0.9457(15) -0.3812(20) 0.5841(14) 0.144 Uiso 1 calc R .
O306 O 0.8957(6) -0.2401(9) 0.5540(6) 0.067(3) Uani 1 d U .
C307 C 0.8678(9) -0.2301(12) 0.6097(8) 0.054(4) Uani 1 d U .
H30I H 0.9099(9) -0.2064(12) 0.6234(8) 0.065 Uiso 1 calc R .
H30J H 0.8574(9) -0.2841(12) 0.6378(8) 0.065 Uiso 1 calc R .
C308 C 0.7846(8) -0.1688(11) 0.6002(8) 0.052(4) Uani 1 d U .
H30K H 0.7640(8) -0.1549(11) 0.6357(8) 0.063 Uiso 1 calc R .
H30L H 0.7950(8) -0.1168(11) 0.5699(8) 0.063 Uiso 1 calc R .
N309 N 0.7206(5) -0.2097(7) 0.5836(5) 0.026(2) Uani 1 d U .
C310 C 0.6516(7) -0.1457(8) 0.5620(6) 0.028(3) Uani 1 d U .
H31A H 0.6366(7) -0.1120(8) 0.5885(6) 0.034 Uiso 1 calc R .
H31B H 0.6024(7) -0.1731(8) 0.5615(6) 0.034 Uiso 1 calc R .
C311 C 0.6713(10) -0.0893(11) 0.5039(8) 0.056(4) Uani 1 d U .
H31C H 0.6236(10) -0.0459(11) 0.4927(8) 0.067 Uiso 1 calc R .
H31D H 0.7205(10) -0.0616(11) 0.5038(8) 0.067 Uiso 1 calc R .
O312 O 0.6880(4) -0.1349(5) 0.4641(4) 0.025(2) Uani 1 d U .
C313 C 0.7032(6) -0.0817(8) 0.4067(5) 0.023(3) Uani 1 d U .
H31E H 0.7549(6) -0.0560(8) 0.4036(5) 0.027 Uiso 1 calc R .
H31F H 0.6565(6) -0.0367(8) 0.3974(5) 0.027 Uiso 1 calc R .
C314 C 0.7116(6) -0.1299(8) 0.3667(5) 0.021(3) Uani 1 d U .
H31G H 0.6610(6) -0.1577(8) 0.3711(5) 0.025 Uiso 1 calc R .
H31H H 0.7173(6) -0.0923(8) 0.3273(5) 0.025 Uiso 1 calc R .
O315 O 0.7845(4) -0.1918(5) 0.3771(3) 0.017(2) Uani 1 d U .
C316 C 0.7947(6) -0.2378(8) 0.3365(6) 0.025(3) Uani 1 d U .
H31I H 0.8007(6) -0.1992(8) 0.2974(6) 0.030 Uiso 1 calc R .
H31J H 0.7449(6) -0.2664(8) 0.3399(6) 0.030 Uiso 1 calc R .
C317 C 0.8714(6) -0.3009(8) 0.3475(6) 0.026(3) Uani 1 d U .
H31K H 0.8808(6) -0.3276(8) 0.3169(6) 0.031 Uiso 1 calc R .
H31L H 0.9201(6) -0.2712(8) 0.3450(6) 0.031 Uiso 1 calc R .
C318 C 0.8132(7) -0.4262(9) 0.4010(6) 0.032(3) Uani 1 d U .
H31M H 0.8421(7) -0.4606(9) 0.3773(6) 0.038 Uiso 1 calc R .
H31N H 0.7620(7) -0.3961(9) 0.3829(6) 0.038 Uiso 1 calc R .
C319 C 0.7887(9) -0.4824(11) 0.4582(8) 0.047(4) Uani 1 d U .
H31O H 0.7569(9) -0.5248(11) 0.4541(8) 0.057 Uiso 1 calc R .
H31P H 0.8393(9) -0.5112(11) 0.4776(8) 0.057 Uiso 1 calc R .
O320 O 0.7396(5) -0.4367(6) 0.4911(4) 0.034(2) Uani 1 d U .
C321 C 0.7187(7) -0.4886(9) 0.5465(6) 0.032(3) Uani 1 d U .
H32A H 0.7696(7) -0.5093(9) 0.5673(6) 0.038 Uiso 1 calc R .
H32B H 0.6945(7) -0.5370(9) 0.5441(6) 0.038 Uiso 1 calc R .
C322 C 0.6574(7) -0.4410(9) 0.5778(6) 0.029(3) Uani 1 d U .
H32C H 0.6088(7) -0.4155(9) 0.5553(6) 0.035 Uiso 1 calc R .
H32D H 0.6374(7) -0.4788(9) 0.6147(6) 0.035 Uiso 1 calc R .
O323 O 0.6972(4) -0.3777(5) 0.5871(4) 0.021(2) Uani 1 d U .
C324 C 0.6406(6) -0.3310(8) 0.6182(5) 0.020(3) Uani 1 d U .
H32E H 0.6151(6) -0.3693(8) 0.6528(5) 0.024 Uiso 1 calc R .
H32F H 0.5955(6) -0.2981(8) 0.5944(5) 0.024 Uiso 1 calc R .
C325 C 0.6882(6) -0.2741(8) 0.6344(5) 0.022(3) Uani 1 d U .
H32G H 0.6513(6) -0.2465(8) 0.6595(5) 0.026 Uiso 1 calc R .
H32H H 0.7355(6) -0.3072(8) 0.6560(5) 0.026 Uiso 1 calc R .
K4 K 0.62473(14) 0.7933(2) 0.04184(12) 0.0268(6) Uani 1 d . .
N400 N 0.7906(6) 0.8585(8) 0.0048(5) 0.037(3) Uani 1 d U .
C401 C 0.7977(8) 0.9192(11) 0.0325(8) 0.050(4) Uani 1 d U .
H40A H 0.8466(8) 0.9485(11) 0.0139(8) 0.060 Uiso 1 calc R .
H40L H 0.8092(8) 0.8896(11) 0.0725(8) 0.060 Uiso 1 calc R .
C402 C 0.7218(8) 0.9844(10) 0.0324(7) 0.045(4) Uani 1 d U .
H40B H 0.7334(8) 1.0237(10) 0.0517(7) 0.054 Uiso 1 calc R .
H40C H 0.7102(8) 1.0163(10) -0.0073(7) 0.054 Uiso 1 calc R .
O403 O 0.6506(5) 0.9432(6) 0.0615(4) 0.030(2) Uani 1 d U .
C404 C 0.5787(7) 1.0003(10) 0.0595(7) 0.040(3) Uani 1 d U .
H40D H 0.5629(7) 1.0238(10) 0.0198(7) 0.048 Uiso 1 calc R .
H40E H 0.5899(7) 1.0465(10) 0.0725(7) 0.048 Uiso 1 calc R .
C405 C 0.5079(7) 0.9580(9) 0.0970(6) 0.033(3) Uani 1 d U .
H40F H 0.5244(7) 0.9323(9) 0.1363(6) 0.040 Uiso 1 calc R .
H40G H 0.4585(7) 0.9993(9) 0.0978(6) 0.040 Uiso 1 calc R .
O406 O 0.4879(4) 0.8960(6) 0.0755(4) 0.029(2) Uani 1 d U .
C407 C 0.4183(7) 0.8607(9) 0.1060(6) 0.032(3) Uani 1 d U .
H40H H 0.3712(7) 0.9048(9) 0.1056(6) 0.038 Uiso 1 calc R .
H40I H 0.4305(7) 0.8325(9) 0.1461(6) 0.038 Uiso 1 calc R .
C408 C 0.3946(7) 0.7990(9) 0.0805(6) 0.032(3) Uani 1 d U .
H40J H 0.3436(7) 0.7765(9) 0.1020(6) 0.038 Uiso 1 calc R .
H40K H 0.3812(7) 0.8283(9) 0.0409(6) 0.038 Uiso 1 calc R .
N409 N 0.4585(5) 0.7310(7) 0.0806(5) 0.028(2) Uani 1 d U .
C410 C 0.4393(7) 0.6875(9) 0.0421(6) 0.034(3) Uani 1 d U .
H41A H 0.3800(7) 0.6778(9) 0.0498(6) 0.041 Uiso 1 calc R .
H41B H 0.4734(7) 0.6327(9) 0.0503(6) 0.041 Uiso 1 calc R .
C411 C 0.4549(7) 0.7333(9) -0.0188(6) 0.037(3) Uani 1 d U .
H41C H 0.4408(7) 0.7005(9) -0.0421(6) 0.044 Uiso 1 calc R .
H41D H 0.4182(7) 0.7866(9) -0.0279(6) 0.044 Uiso 1 calc R .
O412 O 0.5385(5) 0.7491(6) -0.0331(4) 0.033(2) Uani 1 d U .
C413 C 0.5519(7) 0.7938(9) -0.0909(6) 0.033(3) Uani 1 d U .
H41E H 0.5210(7) 0.8502(9) -0.0982(6) 0.040 Uiso 1 calc R .
H41F H 0.5305(7) 0.7655(9) -0.1145(6) 0.040 Uiso 1 calc R .
C414 C 0.6430(7) 0.8003(10) -0.1072(7) 0.038(3) Uani 1 d U .
H41G H 0.6738(7) 0.7439(10) -0.0997(7) 0.045 Uiso 1 calc R .
H41H H 0.6514(7) 0.8294(10) -0.1484(7) 0.045 Uiso 1 calc R .
O415 O 0.6759(5) 0.8452(6) -0.0755(4) 0.035(2) Uani 1 d U .
C416 C 0.7614(7) 0.8504(10) -0.0897(7) 0.042(4) Uani 1 d U .
H41I H 0.7710(7) 0.8777(10) -0.1311(7) 0.050 Uiso 1 calc R .
H41J H 0.7917(7) 0.7937(10) -0.0809(7) 0.050 Uiso 1 calc R .
C417 C 0.7949(8) 0.8978(10) -0.0584(7) 0.042(4) Uani 1 d U .
H41K H 0.7635(8) 0.9540(10) -0.0668(7) 0.050 Uiso 1 calc R .
H41L H 0.8538(8) 0.9043(10) -0.0725(7) 0.050 Uiso 1 calc R .
C418 C 0.8566(7) 0.7907(10) 0.0185(7) 0.044(4) Uani 1 d U .
H41M H 0.9100(7) 0.8137(10) 0.0152(7) 0.053 Uiso 1 calc R .
H41N H 0.8612(7) 0.7599(10) -0.0097(7) 0.053 Uiso 1 calc R .
C419 C 0.8434(7) 0.7301(10) 0.0782(7) 0.040(3) Uani 1 d U .
H41O H 0.8931(7) 0.6886(10) 0.0869(7) 0.048 Uiso 1 calc R .
H41P H 0.8347(7) 0.7605(10) 0.1067(7) 0.048 Uiso 1 calc R .
O420 O 0.7725(5) 0.6900(6) 0.0802(4) 0.034(2) Uani 1 d U .
C421 C 0.7615(7) 0.6276(9) 0.1337(6) 0.033(3) Uani 1 d U .
H42A H 0.7562(7) 0.6531(9) 0.1648(6) 0.039 Uiso 1 calc R .
H42B H 0.8110(7) 0.5853(9) 0.1390(6) 0.039 Uiso 1 calc R .
C422 C 0.6854(6) 0.5872(8) 0.1363(6) 0.025(3) Uani 1 d U .
H42C H 0.6894(6) 0.5636(8) 0.1043(6) 0.030 Uiso 1 calc R .
H42D H 0.6805(6) 0.5415(8) 0.1723(6) 0.030 Uiso 1 calc R .
O423 O 0.6123(4) 0.6493(5) 0.1328(4) 0.028(2) Uani 1 d U .
C424 C 0.5366(7) 0.6097(9) 0.1453(6) 0.033(3) Uani 1 d U .
H42E H 0.5346(7) 0.5717(9) 0.1847(6) 0.040 Uiso 1 calc R .
H42F H 0.5357(7) 0.5766(9) 0.1191(6) 0.040 Uiso 1 calc R .
C425 C 0.4654(7) 0.6724(9) 0.1388(7) 0.037(3) Uani 1 d U .
H42G H 0.4676(7) 0.7048(9) 0.1652(7) 0.045 Uiso 1 calc R .
H42H H 0.4142(7) 0.6444(9) 0.1503(7) 0.045 Uiso 1 calc R .
N500 N 1.2098(6) 0.2965(8) 0.1830(5) 0.035(3) Uani 1 d U .
H50A H 1.2209(6) 0.2572(8) 0.1665(5) 0.042 Uiso 1 calc R .
H50B H 1.2298(6) 0.3444(8) 0.1672(5) 0.042 Uiso 1 calc R .
C501 C 1.1594(7) 0.2828(8) 0.2356(6) 0.026(3) Uani 1 d U .
H50C H 1.1093(7) 0.3243(8) 0.2311(6) 0.031 Uiso 1 calc R .
H50D H 1.1911(7) 0.2888(8) 0.2652(6) 0.031 Uiso 1 calc R .
C502 C 1.1336(8) 0.1959(9) 0.2531(7) 0.039(3) Uani 1 d U .
H50E H 1.1844(8) 0.1553(9) 0.2563(7) 0.047 Uiso 1 calc R .
H50F H 1.1029(8) 0.1847(9) 0.2912(7) 0.047 Uiso 1 calc R .
N503 N 1.0817(6) 0.1830(8) 0.2140(5) 0.034(3) Uani 1 d U .
H50G H 1.0681(6) 0.2238(8) 0.1834(5) 0.041 Uiso 1 calc R .
H50H H 1.0639(6) 0.1344(8) 0.2208(5) 0.041 Uiso 1 calc R .
N510 N 1.1808(8) -0.0837(11) 0.3792(8) 0.078(5) Uani 1 d U .
H51A H 1.2225(8) -0.0544(11) 0.3748(8) 0.094 Uiso 1 calc R .
H51B H 1.1327(8) -0.0593(11) 0.3660(8) 0.094 Uiso 1 calc R .
C511 C 1.1912(11) -0.1718(14) 0.4082(10) 0.073(6) Uani 1 d U .
H51C H 1.1789(11) -0.2009(14) 0.3820(10) 0.088 Uiso 1 calc R .
H51D H 1.1488(11) -0.1834(14) 0.4410(10) 0.088 Uiso 1 calc R .
C512 C 1.2723(10) -0.2079(13) 0.4289(9) 0.065(5) Uani 1 d U .
H51E H 1.3152(10) -0.1903(13) 0.3971(9) 0.078 Uiso 1 calc R .
H51F H 1.2814(10) -0.1836(13) 0.4586(9) 0.078 Uiso 1 calc R .
N513 N 1.2862(9) -0.2947(11) 0.4515(8) 0.071(5) Uani 1 d U .
H51G H 1.2465(9) -0.3251(11) 0.4527(8) 0.085 Uiso 1 calc R .
H51H H 1.3345(9) -0.3187(11) 0.4644(8) 0.085 Uiso 1 calc R .
N520 N 0.8892(12) 0.0064(15) 0.5124(10) 0.114(7) Uani 1 d U .
H52A H 0.8869(12) -0.0472(15) 0.5282(10) 0.136 Uiso 1 calc R .
H52B H 0.8429(12) 0.0410(15) 0.5083(10) 0.136 Uiso 1 calc R .
C521 C 0.9660(10) 0.0364(14) 0.4938(10) 0.075(6) Uani 1 d U .
H52C H 0.9741(10) 0.0761(14) 0.5138(10) 0.090 Uiso 1 calc R .
H52D H 0.9681(10) 0.0658(14) 0.4525(10) 0.090 Uiso 1 calc R .
 
loop_
  _atom_site_aniso_label
  _atom_site_aniso_U_11
  _atom_site_aniso_U_22
  _atom_site_aniso_U_33
  _atom_site_aniso_U_23
  _atom_site_aniso_U_13
  _atom_site_aniso_U_12
Pb1 0.0288(2) 0.0395(3) 0.0268(3) -0.0183(2) -0.0108(2) -0.0031(2)
Pb2 0.0220(2) 0.0164(3) 0.0241(3) -0.0103(2) 0.0031(2) -0.0061(2)
Pb3 0.0166(2) 0.0236(3) 0.0253(3) -0.0111(2) -0.0015(2) 0.0019(2)
Pb4 0.0373(2) 0.0207(3) 0.0149(3) -0.0012(2) -0.0078(2) -0.0022(2)
Pb5 0.0236(2) 0.0263(3) 0.0127(3) -0.0118(2) 0.00313(15) -0.0050(2)
Pb6 0.0189(2) 0.0146(2) 0.0164(3) -0.0081(2) -0.00142(14) 0.00195(14)
Pb7 0.0194(2) 0.0205(3) 0.0116(2) -0.0051(2) 0.00398(14) -0.00510(15)
Pb8 0.0233(2) 0.0145(2) 0.0177(3) -0.0090(2) -0.0025(2) 0.00184(15)
Pb9 0.0220(2) 0.0204(3) 0.0137(3) -0.0073(2) 0.00408(15) -0.0091(2)
W10 0.0183(2) 0.0164(3) 0.0111(3) -0.0069(2) -0.00160(15) -0.0015(2)
C11 0.022(4) 0.023(5) 0.022(5) -0.008(4) 0.005(3) -0.004(3)
O11 0.019(3) 0.027(5) 0.024(5) -0.011(4) 0.002(3) 0.001(3)
C12 0.022(4) 0.011(5) 0.018(5) -0.006(4) -0.004(3) -0.005(3)
O12 0.043(4) 0.029(5) 0.019(5) -0.017(4) 0.001(3) -0.001(4)
C13 0.021(4) 0.019(5) 0.016(5) -0.011(4) -0.003(3) 0.005(3)
O13 0.032(4) 0.034(5) 0.020(5) -0.002(4) -0.005(3) -0.004(3)
W2 0.0172(2) 0.0171(3) 0.0134(3) -0.0051(2) 0.0004(2) -0.0014(2)
C1 0.026(4) 0.027(5) 0.024(5) -0.009(4) -0.007(4) 0.000(4)
O1 0.035(4) 0.050(6) 0.029(6) -0.013(5) 0.011(4) -0.003(4)
C2 0.020(3) 0.003(4) 0.015(5) -0.003(4) 0.003(3) 0.001(3)
O2 0.035(4) 0.041(6) 0.030(6) -0.020(4) 0.001(3) -0.012(4)
C3 0.015(3) 0.025(5) 0.018(5) -0.009(4) 0.003(3) -0.003(3)
O3 0.025(3) 0.025(5) 0.026(5) -0.008(4) -0.004(3) 0.006(3)
N1 0.029(3) 0.017(4) 0.022(5) -0.013(4) 0.000(3) 0.000(3)
C4 0.045(5) 0.037(6) 0.032(6) -0.010(5) -0.001(4) 0.002(4)
C5 0.064(6) 0.057(7) 0.049(7) -0.017(5) -0.007(5) 0.005(5)
N2 0.057(6) 0.069(9) 0.062(9) -0.039(7) -0.031(6) 0.011(6)
N3 0.025(3) 0.016(4) 0.015(4) -0.004(3) -0.002(3) 0.001(3)
C6 0.025(4) 0.027(5) 0.023(5) -0.010(4) -0.005(4) 0.003(4)
C7 0.028(4) 0.033(5) 0.025(5) -0.015(4) -0.003(4) 0.000(4)
N4 0.025(3) 0.017(4) 0.023(5) -0.010(4) -0.002(3) -0.001(3)
K1 0.0195(9) 0.0130(13) 0.0128(14) -0.0055(10) 0.0010(8) -0.0025(8)
N100 0.024(3) 0.018(4) 0.020(5) -0.010(4) 0.002(3) 0.001(3)
C101 0.027(4) 0.021(5) 0.022(5) -0.010(4) 0.000(4) 0.003(4)
C102 0.028(4) 0.018(5) 0.024(5) -0.008(4) 0.004(4) -0.004(4)
O103 0.020(3) 0.012(4) 0.020(4) -0.008(3) 0.001(3) -0.002(2)
C104 0.017(3) 0.026(5) 0.021(5) -0.006(4) 0.000(3) -0.002(3)
C105 0.025(4) 0.021(5) 0.021(5) -0.007(4) -0.003(4) -0.001(3)
O106 0.024(3) 0.014(4) 0.014(4) -0.003(3) 0.005(3) -0.003(3)
C107 0.021(4) 0.023(5) 0.026(5) -0.012(4) 0.005(3) 0.005(3)
C108 0.023(4) 0.017(5) 0.017(5) -0.006(4) 0.007(3) -0.002(3)
N109 0.025(3) 0.014(4) 0.014(4) -0.004(3) -0.001(3) -0.004(3)
C110 0.029(4) 0.022(5) 0.025(5) -0.009(4) -0.001(4) -0.006(4)
C111 0.031(4) 0.025(5) 0.023(5) -0.007(4) -0.004(4) -0.001(4)
O112 0.026(3) 0.015(4) 0.019(4) -0.007(3) -0.007(3) -0.004(3)
C113 0.026(4) 0.022(5) 0.020(5) -0.009(4) -0.003(3) -0.007(3)
C114 0.029(4) 0.032(5) 0.032(6) -0.010(4) -0.001(4) -0.002(4)
O115 0.029(3) 0.018(4) 0.015(4) -0.010(3) 0.001(3) 0.000(3)
C116 0.035(4) 0.030(5) 0.027(5) -0.016(4) 0.002(4) -0.003(4)
C117 0.036(4) 0.017(5) 0.027(5) -0.014(4) 0.002(4) -0.003(4)
C118 0.024(4) 0.028(5) 0.021(5) -0.013(4) 0.002(4) 0.009(4)
C119 0.025(4) 0.023(5) 0.021(5) -0.005(4) -0.001(4) 0.001(3)
O120 0.021(3) 0.022(4) 0.025(4) -0.002(3) -0.005(3) 0.001(3)
C121 0.024(4) 0.030(5) 0.032(5) -0.006(4) -0.004(4) 0.000(4)
C122 0.025(4) 0.032(5) 0.041(6) -0.012(4) -0.002(4) -0.008(4)
O123 0.019(3) 0.018(4) 0.029(4) -0.006(3) 0.001(3) -0.005(3)
C124 0.026(4) 0.020(5) 0.024(5) -0.005(4) 0.000(4) -0.011(4)
C125 0.031(4) 0.022(5) 0.030(5) -0.011(4) -0.005(4) -0.003(4)
K2 0.0172(9) 0.0213(14) 0.0147(14) -0.0064(11) 0.0012(8) -0.0010(8)
N200 0.028(3) 0.033(5) 0.022(5) -0.010(4) 0.001(3) -0.002(3)
C201 0.041(4) 0.037(6) 0.022(5) -0.021(4) -0.001(4) 0.001(4)
C202 0.022(4) 0.038(6) 0.028(5) -0.010(4) 0.004(4) 0.004(4)
O203 0.021(3) 0.028(4) 0.014(4) -0.006(3) -0.002(3) 0.000(3)
C204 0.023(4) 0.025(5) 0.016(5) -0.007(4) -0.004(3) 0.000(3)
C205 0.024(4) 0.023(5) 0.022(5) -0.005(4) -0.006(4) -0.002(3)
O206 0.023(3) 0.027(4) 0.023(4) -0.008(3) -0.003(3) 0.000(3)
C207 0.029(4) 0.038(6) 0.022(5) -0.012(4) -0.001(4) -0.004(4)
C208 0.037(4) 0.040(6) 0.032(6) -0.018(4) -0.004(4) -0.005(4)
N209 0.029(3) 0.031(5) 0.029(5) -0.013(4) 0.004(3) -0.005(3)
C210 0.031(4) 0.034(6) 0.033(6) -0.019(4) 0.003(4) 0.003(4)
C211 0.040(5) 0.042(6) 0.044(6) -0.016(5) 0.000(4) -0.003(4)
O212 0.042(3) 0.034(5) 0.035(5) -0.014(4) 0.005(3) -0.005(3)
C213 0.048(5) 0.035(6) 0.043(6) -0.014(5) -0.002(4) -0.007(4)
C214 0.050(5) 0.043(6) 0.046(6) -0.007(5) 0.001(5) -0.004(4)
O215 0.034(3) 0.029(4) 0.027(5) -0.001(4) 0.003(3) 0.003(3)
C216 0.042(5) 0.038(6) 0.030(6) -0.005(4) -0.001(4) -0.003(4)
C217 0.035(4) 0.046(6) 0.034(6) -0.014(5) 0.002(4) -0.002(4)
C218 0.039(5) 0.049(6) 0.040(6) -0.015(5) -0.004(4) -0.002(4)
C219 0.034(4) 0.039(6) 0.032(6) -0.020(4) -0.005(4) 0.003(4)
O220 0.030(3) 0.033(4) 0.028(4) -0.015(4) -0.003(3) 0.000(3)
C221 0.036(4) 0.037(6) 0.040(6) -0.011(4) -0.009(4) -0.015(4)
C222 0.031(4) 0.032(5) 0.032(6) -0.013(4) 0.001(4) -0.014(4)
O223 0.021(3) 0.028(4) 0.019(4) -0.012(3) 0.001(3) -0.005(3)
C224 0.028(4) 0.042(6) 0.038(6) -0.009(4) 0.004(4) -0.012(4)
C225 0.035(4) 0.041(6) 0.027(6) -0.014(4) 0.003(4) -0.005(4)
K3 0.0204(9) 0.0220(15) 0.0128(14) -0.0073(11) 0.0003(8) -0.0049(9)
N300 0.025(3) 0.022(4) 0.016(4) -0.007(4) -0.005(3) 0.000(3)
C301 0.035(4) 0.039(6) 0.036(6) -0.010(4) -0.006(4) 0.007(4)
C302 0.038(4) 0.047(6) 0.033(6) -0.019(5) -0.002(4) 0.002(4)
O303 0.041(4) 0.082(6) 0.046(5) -0.027(4) -0.016(4) 0.001(4)
C304 0.078(7) 0.103(8) 0.087(8) -0.030(6) -0.017(5) -0.017(5)
C305 0.117(10) 0.129(11) 0.120(11) -0.041(6) -0.022(6) -0.015(6)
O306 0.051(4) 0.099(6) 0.065(6) -0.042(5) -0.002(4) -0.017(4)
C307 0.055(5) 0.066(7) 0.053(7) -0.027(5) -0.009(5) -0.020(5)
C308 0.060(5) 0.052(7) 0.052(7) -0.020(5) -0.004(5) -0.018(5)
N309 0.033(4) 0.029(5) 0.019(5) -0.011(4) 0.002(3) -0.011(3)
C310 0.039(4) 0.022(5) 0.020(5) -0.008(4) 0.010(4) 0.002(4)
C311 0.064(6) 0.048(7) 0.053(7) -0.014(5) -0.002(5) -0.004(5)
O312 0.037(3) 0.018(4) 0.021(4) -0.007(3) 0.006(3) -0.008(3)
C313 0.027(4) 0.019(5) 0.017(5) 0.000(4) 0.000(4) 0.000(3)
C314 0.024(4) 0.024(5) 0.015(5) -0.006(4) -0.004(3) 0.001(3)
O315 0.020(3) 0.016(4) 0.013(4) -0.006(3) 0.004(2) 0.000(3)
C316 0.024(4) 0.034(5) 0.022(5) -0.015(4) 0.002(4) -0.002(4)
C317 0.026(4) 0.031(5) 0.025(5) -0.015(4) -0.004(4) -0.002(4)
C318 0.042(4) 0.026(5) 0.031(6) -0.014(4) -0.001(4) -0.005(4)
C319 0.056(5) 0.039(6) 0.048(6) -0.017(5) 0.005(5) -0.006(4)
O320 0.039(3) 0.030(4) 0.035(5) -0.012(4) 0.006(3) -0.010(3)
C321 0.043(4) 0.026(5) 0.026(5) -0.012(4) 0.008(4) -0.008(4)
C322 0.035(4) 0.029(5) 0.026(5) -0.010(4) 0.006(4) -0.009(4)
O323 0.025(3) 0.020(4) 0.020(4) -0.008(3) 0.003(3) -0.009(3)
C324 0.023(4) 0.025(5) 0.015(5) -0.008(4) -0.003(3) -0.003(3)
C325 0.025(4) 0.023(5) 0.018(5) -0.009(4) 0.003(3) -0.004(3)
K4 0.0380(12) 0.025(2) 0.017(2) -0.0057(12) -0.0068(10) -0.0003(11)
N400 0.038(4) 0.038(5) 0.031(5) -0.006(4) -0.005(4) -0.005(4)
C401 0.051(5) 0.053(6) 0.053(7) -0.018(5) -0.012(5) -0.015(5)
C402 0.053(5) 0.041(6) 0.046(6) -0.015(5) -0.009(4) -0.012(4)
O403 0.044(3) 0.027(4) 0.023(4) -0.012(3) -0.011(3) -0.002(3)
C404 0.046(5) 0.039(6) 0.041(6) -0.017(5) -0.020(4) -0.002(4)
C405 0.041(4) 0.034(6) 0.027(5) -0.013(4) -0.015(4) 0.007(4)
O406 0.037(3) 0.028(4) 0.023(4) -0.009(3) -0.008(3) -0.001(3)
C407 0.036(4) 0.033(5) 0.023(5) -0.010(4) 0.002(4) 0.006(4)
C408 0.033(4) 0.031(5) 0.033(6) -0.010(4) -0.002(4) -0.005(4)
N409 0.036(4) 0.028(5) 0.023(5) -0.011(4) -0.003(3) -0.003(3)
C410 0.040(4) 0.033(6) 0.033(6) -0.009(4) -0.010(4) -0.009(4)
C411 0.043(5) 0.037(6) 0.034(6) -0.013(4) -0.008(4) -0.011(4)
O412 0.046(4) 0.032(4) 0.026(5) -0.010(4) -0.009(3) -0.007(3)
C413 0.039(4) 0.036(6) 0.028(6) -0.012(4) -0.002(4) -0.008(4)
C414 0.043(5) 0.040(6) 0.031(6) -0.012(4) -0.008(4) 0.001(4)
O415 0.041(3) 0.039(5) 0.028(5) -0.013(4) -0.001(3) -0.003(3)
C416 0.046(5) 0.038(6) 0.037(6) -0.007(5) 0.003(4) -0.005(4)
C417 0.042(5) 0.041(6) 0.043(6) -0.012(5) -0.001(4) -0.012(4)
C418 0.038(5) 0.051(6) 0.041(6) -0.010(5) -0.002(4) -0.007(4)
C419 0.042(5) 0.047(6) 0.034(6) -0.013(5) -0.007(4) -0.006(4)
O420 0.036(3) 0.038(5) 0.026(5) -0.007(4) -0.005(3) -0.002(3)
C421 0.034(4) 0.031(5) 0.025(5) -0.004(4) -0.002(4) 0.007(4)
C422 0.037(4) 0.014(5) 0.022(5) -0.010(4) 0.002(4) 0.004(4)
O423 0.030(3) 0.021(4) 0.031(4) -0.008(3) 0.001(3) 0.002(3)
C424 0.036(4) 0.032(6) 0.031(6) -0.009(4) -0.001(4) -0.003(4)
C425 0.043(5) 0.035(6) 0.037(6) -0.014(4) -0.001(4) -0.007(4)
N500 0.046(5) 0.038(7) 0.030(7) -0.019(5) 0.006(4) -0.020(5)
C501 0.033(4) 0.023(5) 0.021(5) -0.003(4) -0.002(4) -0.008(4)
C502 0.041(4) 0.039(6) 0.038(6) -0.010(5) -0.004(4) -0.009(4)
N503 0.041(5) 0.032(6) 0.035(7) -0.016(5) 0.002(4) -0.016(4)
N510 0.055(6) 0.092(10) 0.069(10) -0.003(8) -0.008(6) 0.002(6)
C511 0.079(7) 0.074(8) 0.070(8) -0.026(5) -0.004(5) -0.012(5)
C512 0.065(6) 0.068(7) 0.060(7) -0.018(5) -0.001(5) -0.008(5)
N513 0.074(7) 0.064(9) 0.076(10) -0.024(7) -0.006(7) -0.007(6)
N520 0.107(9) 0.111(12) 0.115(12) -0.026(9) -0.006(9) -0.009(8)
C521 0.078(7) 0.081(8) 0.068(8) -0.025(5) -0.015(5) -0.002(5)
 
_geom_special_details
;
  All esds (except the esd in the dihedral angle between two l.s. planes)
  are estimated using the full covariance matrix.  The cell esds are taken
  into account individually in the estimation of esds in distances, angles
  and torsion angles; correlations between esds in cell parameters are only
  used when they are defined by crystal symmetry.  An approximate (isotropic)
  treatment of cell esds is used for estimating esds involving l.s. planes.
;
 
loop_
  _geom_bond_atom_site_label_1
  _geom_bond_atom_site_label_2
  _geom_bond_distance
  _geom_bond_site_symmetry_2
  _geom_bond_publ_flag
Pb1 Pb2 3.0330(11) . ?
Pb1 Pb5 3.0417(9) . ?
Pb1 Pb3 3.0557(10) . ?
Pb1 Pb4 3.0737(9) . ?
Pb2 Pb6 3.1136(8) . ?
Pb2 Pb7 3.1184(9) . ?
Pb2 Pb3 3.3076(10) . ?
Pb2 Pb5 3.3282(11) . ?
Pb3 Pb7 3.0854(10) . ?
Pb3 Pb8 3.1703(8) . ?
Pb3 Pb4 3.3050(11) . ?
Pb4 Pb9 3.1289(9) . ?
Pb4 Pb8 3.1471(10) . ?
Pb4 Pb5 3.3086(10) . ?
Pb5 Pb6 3.0813(10) . ?
Pb5 Pb9 3.1364(8) . ?
Pb6 W10 2.9902(9) . ?
Pb6 Pb9 3.1948(10) . ?
Pb6 Pb7 3.2962(10) . ?
Pb7 W10 3.0081(8) . ?
Pb7 Pb8 3.2171(10) . ?
Pb8 W10 3.0347(10) . ?
Pb8 Pb9 3.1466(9) . ?
Pb9 W10 3.0768(10) . ?
W10 C12 1.928(13) . ?
W10 C13 1.935(12) . ?
W10 C11 1.939(9) . ?
C11 O11 1.189(11) . ?
C12 O12 1.186(14) . ?
C13 O13 1.171(14) . ?
W2 C1 1.912(13) . ?
W2 C2 1.934(10) . ?
W2 C3 1.933(12) . ?
W2 N4 2.286(10) . ?
W2 N3 2.294(9) . ?
W2 N1 2.290(10) . ?
C1 O1 1.21(2) . ?
C2 O2 1.196(14) . ?
C3 O3 1.180(14) . ?
N1 C4 1.47(2) . ?
N1 H1A 0.92 . ?
N1 H1B 0.92 . ?
C4 C5 1.57(2) . ?
C4 H4C 0.99 . ?
C4 H4D 0.99 . ?
C5 N2 1.45(2) . ?
C5 H5A 0.99 . ?
C5 H5B 0.99 . ?
N2 H2A 0.88 . ?
N2 H2B 0.88 . ?
N3 C6 1.48(2) . ?
N3 H3A 0.92 . ?
N3 H3B 0.92 . ?
C6 C7 1.49(2) . ?
C6 H6A 0.99 . ?
C6 H6B 0.99 . ?
C7 N4 1.501(15) . ?
C7 H7A 0.99 . ?
C7 H7B 0.99 . ?
N4 H4A 0.92 . ?
N4 H4B 0.92 . ?
K1 O103 2.793(8) . ?
K1 O106 2.815(8) . ?
K1 O115 2.833(9) . ?
K1 O112 2.854(8) . ?
K1 O123 2.876(8) . ?
K1 O120 2.878(7) . ?
K1 N109 2.888(10) . ?
K1 N100 2.933(10) . ?
N100 C117 1.46(2) . ?
N100 C118 1.477(12) . ?
N100 C101 1.48(2) . ?
C101 C102 1.490(14) . ?
C101 H10A 0.99 . ?
C101 H10B 0.99 . ?
C102 O103 1.454(14) . ?
C102 H10C 0.99 . ?
C102 H10D 0.99 . ?
O103 C104 1.428(12) . ?
C104 C105 1.48(2) . ?
C104 H10E 0.99 . ?
C104 H10F 0.99 . ?
C105 O106 1.427(14) . ?
C105 H10G 0.99 . ?
C105 H10H 0.99 . ?
O106 C107 1.430(15) . ?
C107 C108 1.49(2) . ?
C107 H10I 0.99 . ?
C107 H10J 0.99 . ?
C108 N109 1.493(12) . ?
C108 H10K 0.99 . ?
C108 H10L 0.99 . ?
N109 C110 1.48(2) . ?
N109 C125 1.489(15) . ?
C110 C111 1.53(2) . ?
C110 H11A 0.99 . ?
C110 H11B 0.99 . ?
C111 O112 1.404(15) . ?
C111 H11C 0.99 . ?
C111 H11D 0.99 . ?
O112 C113 1.419(14) . ?
C113 C114 1.48(2) . ?
C113 H11E 0.99 . ?
C113 H11F 0.99 . ?
C114 O115 1.43(2) . ?
C114 H11G 0.99 . ?
C114 H11H 0.99 . ?
O115 C116 1.45(2) . ?
C116 C117 1.49(2) . ?
C116 H11I 0.99 . ?
C116 H11J 0.99 . ?
C117 H11K 0.99 . ?
C117 H11P 0.99 . ?
C118 C119 1.53(2) . ?
C118 H11L 0.99 . ?
C118 H11M 0.99 . ?
C119 O120 1.435(14) . ?
C119 H11N 0.99 . ?
C119 H11O 0.99 . ?
O120 C121 1.43(2) . ?
C121 C122 1.49(2) . ?
C121 H12A 0.99 . ?
C121 H12B 0.99 . ?
C122 O123 1.439(12) . ?
C122 H12C 0.99 . ?
C122 H12D 0.99 . ?
O123 C124 1.433(14) . ?
C124 C125 1.499(14) . ?
C124 H12E 0.99 . ?
C124 H12F 0.99 . ?
C125 H12G 0.99 . ?
C125 H12H 0.99 . ?
K2 O203 2.782(7) . ?
K2 O212 2.800(10) . ?
K2 O223 2.802(7) . ?
K2 O215 2.806(9) . ?
K2 O206 2.880(8) . ?
K2 O220 2.905(9) . ?
K2 N200 2.965(12) . ?
K2 N209 2.979(12) . ?
N200 C218 1.46(2) . ?
N200 C201 1.46(2) . ?
N200 C217 1.50(2) . ?
C201 C202 1.51(2) . ?
C201 H20A 0.99 . ?
C201 H20B 0.99 . ?
C202 O203 1.43(2) . ?
C202 H20C 0.99 . ?
C202 H20D 0.99 . ?
O203 C204 1.427(12) . ?
C204 C205 1.51(2) . ?
C204 H20E 0.99 . ?
C204 H20F 0.99 . ?
C205 O206 1.413(14) . ?
C205 H20G 0.99 . ?
C205 H20H 0.99 . ?
O206 C207 1.40(2) . ?
C207 C208 1.47(2) . ?
C207 H20I 0.99 . ?
C207 H20J 0.99 . ?
C208 N209 1.488(15) . ?
C208 H20K 0.99 . ?
C208 H20L 0.99 . ?
N209 C225 1.44(2) . ?
N209 C210 1.47(2) . ?
C210 C211 1.51(2) . ?
C210 H21A 0.99 . ?
C210 H21B 0.99 . ?
C211 O212 1.45(2) . ?
C211 H21C 0.99 . ?
C211 H21D 0.99 . ?
O212 C213 1.44(2) . ?
C213 C214 1.47(2) . ?
C213 H21E 0.99 . ?
C213 H21F 0.99 . ?
C214 O215 1.44(2) . ?
C214 H21G 0.99 . ?
C214 H21H 0.99 . ?
O215 C216 1.40(2) . ?
C216 C217 1.46(2) . ?
C216 H21I 0.99 . ?
C216 H21J 0.99 . ?
C217 H21K 0.99 . ?
C217 H21L 0.99 . ?
C218 C219 1.53(2) . ?
C218 H21M 0.99 . ?
C218 H21N 0.99 . ?
C219 O220 1.41(2) . ?
C219 H21O 0.99 . ?
C219 H21P 0.99 . ?
O220 C221 1.42(2) . ?
C221 C222 1.48(2) . ?
C221 H22A 0.99 . ?
C221 H22B 0.99 . ?
C222 O223 1.435(14) . ?
C222 H22C 0.99 . ?
C222 H22D 0.99 . ?
O223 C224 1.41(2) . ?
C224 C225 1.51(2) . ?
C224 H22E 0.99 . ?
C224 H22F 0.99 . ?
C225 H22G 0.99 . ?
C225 H22H 0.99 . ?
K3 O306 2.754(11) . ?
K3 O323 2.802(8) . ?
K3 O312 2.824(9) . ?
K3 O315 2.832(8) . ?
K3 O320 2.834(10) . ?
K3 O303 2.846(9) . ?
K3 N309 2.997(12) . ?
K3 N300 3.030(11) . ?
N300 C317 1.44(2) . ?
N300 C318 1.477(15) . ?
N300 C301 1.487(13) . ?
C301 C302 1.49(2) . ?
C301 H30A 0.99 . ?
C301 H30B 0.99 . ?
C302 O303 1.39(2) . ?
C302 H30C 0.99 . ?
C302 H30D 0.99 . ?
O303 C304 1.60(2) . ?
C304 C305 1.63(4) . ?
C304 H30E 0.99 . ?
C304 H30F 0.99 . ?
C305 O306 1.74(3) . ?
C305 H30G 0.99 . ?
C305 H30H 0.99 . ?
O306 C307 1.46(2) . ?
C307 C308 1.58(2) . ?
C307 H30I 0.99 . ?
C307 H30J 0.99 . ?
C308 N309 1.50(2) . ?
C308 H30K 0.99 . ?
C308 H30L 0.99 . ?
N309 C310 1.47(2) . ?
N309 C325 1.49(2) . ?
C310 C311 1.49(2) . ?
C310 H31A 0.99 . ?
C310 H31B 0.99 . ?
C311 O312 1.42(2) . ?
C311 H31C 0.99 . ?
C311 H31D 0.99 . ?
O312 C313 1.445(14) . ?
C313 C314 1.46(2) . ?
C313 H31E 0.99 . ?
C313 H31F 0.99 . ?
C314 O315 1.456(13) . ?
C314 H31G 0.99 . ?
C314 H31H 0.99 . ?
O315 C316 1.45(2) . ?
C316 C317 1.51(2) . ?
C316 H31I 0.99 . ?
C316 H31J 0.99 . ?
C317 H31K 0.99 . ?
C317 H31L 0.99 . ?
C318 C319 1.49(2) . ?
C318 H31M 0.99 . ?
C318 H31N 0.99 . ?
C319 O320 1.40(2) . ?
C319 H31O 0.99 . ?
C319 H31P 0.99 . ?
O320 C321 1.42(2) . ?
C321 C322 1.49(2) . ?
C321 H32A 0.99 . ?
C321 H32B 0.99 . ?
C322 O323 1.432(15) . ?
C322 H32C 0.99 . ?
C322 H32D 0.99 . ?
O323 C324 1.442(15) . ?
C324 C325 1.50(2) . ?
C324 H32E 0.99 . ?
C324 H32F 0.99 . ?
C325 H32G 0.99 . ?
C325 H32H 0.99 . ?
K4 O423 2.783(9) . ?
K4 O412 2.805(9) . ?
K4 O415 2.826(11) . ?
K4 O406 2.834(9) . ?
K4 O420 2.836(8) . ?
K4 O403 2.854(10) . ?
K4 N409 2.995(9) . ?
K4 N400 3.005(10) . ?
N400 C401 1.44(2) . ?
N400 C418 1.44(2) . ?
N400 C417 1.50(2) . ?
C401 C402 1.53(2) . ?
C401 H40A 0.99 . ?
C401 H40L 0.99 . ?
C402 O403 1.44(2) . ?
C402 H40B 0.99 . ?
C402 H40C 0.99 . ?
O403 C404 1.40(2) . ?
C404 C405 1.51(2) . ?
C404 H40D 0.99 . ?
C404 H40E 0.99 . ?
C405 O406 1.42(2) . ?
C405 H40F 0.99 . ?
C405 H40G 0.99 . ?
O406 C407 1.390(14) . ?
C407 C408 1.51(2) . ?
C407 H40H 0.99 . ?
C407 H40I 0.99 . ?
C408 N409 1.44(2) . ?
C408 H40J 0.99 . ?
C408 H40K 0.99 . ?
N409 C410 1.47(2) . ?
N409 C425 1.48(2) . ?
C410 C411 1.48(2) . ?
C410 H41A 0.99 . ?
C410 H41B 0.99 . ?
C411 O412 1.408(14) . ?
C411 H41C 0.99 . ?
C411 H41D 0.99 . ?
O412 C413 1.41(2) . ?
C413 C414 1.50(2) . ?
C413 H41E 0.99 . ?
C413 H41F 0.99 . ?
C414 O415 1.45(2) . ?
C414 H41G 0.99 . ?
C414 H41H 0.99 . ?
O415 C416 1.403(14) . ?
C416 C417 1.48(2) . ?
C416 H41I 0.99 . ?
C416 H41J 0.99 . ?
C417 H41K 0.99 . ?
C417 H41L 0.99 . ?
C418 C419 1.53(2) . ?
C418 H41M 0.99 . ?
C418 H41N 0.99 . ?
C419 O420 1.417(14) . ?
C419 H41O 0.99 . ?
C419 H41P 0.99 . ?
O420 C421 1.43(2) . ?
C421 C422 1.49(2) . ?
C421 H42A 0.99 . ?
C421 H42B 0.99 . ?
C422 O423 1.464(13) . ?
C422 H42C 0.99 . ?
C422 H42D 0.99 . ?
O423 C424 1.448(13) . ?
C424 C425 1.44(2) . ?
C424 H42E 0.99 . ?
C424 H42F 0.99 . ?
C425 H42G 0.99 . ?
C425 H42H 0.99 . ?
N500 C501 1.43(2) . ?
N500 H50A 0.88 . ?
N500 H50B 0.88 . ?
C501 C502 1.52(2) . ?
C501 H50C 0.99 . ?
C501 H50D 0.99 . ?
C502 N503 1.45(2) . ?
C502 H50E 0.99 . ?
C502 H50F 0.99 . ?
N503 H50G 0.88 . ?
N503 H50H 0.88 . ?
N510 C511 1.44(3) . ?
N510 H51A 0.88 . ?
N510 H51B 0.88 . ?
C511 C512 1.45(2) . ?
C511 H51C 0.99 . ?
C511 H51D 0.99 . ?
C512 N513 1.41(2) . ?
C512 H51E 0.99 . ?
C512 H51F 0.99 . ?
N513 H51G 0.88 . ?
N513 H51H 0.88 . ?
N520 C521 1.39(3) . ?
N520 H52A 0.88 . ?
N520 H52B 0.88 . ?
C521 C521 1.52(4) 2_756 ?
C521 H52C 0.99 . ?
C521 H52D 0.99 . ?
 
loop_
  _geom_angle_atom_site_label_1
  _geom_angle_atom_site_label_2
  _geom_angle_atom_site_label_3
  _geom_angle
  _geom_angle_site_symmetry_1
  _geom_angle_site_symmetry_3
  _geom_angle_publ_flag
Pb2 Pb1 Pb5 66.44(3) . . ?
Pb2 Pb1 Pb3 65.81(2) . . ?
Pb5 Pb1 Pb3 100.20(2) . . ?
Pb2 Pb1 Pb4 100.38(2) . . ?
Pb5 Pb1 Pb4 65.51(2) . . ?
Pb3 Pb1 Pb4 65.26(2) . . ?
Pb1 Pb2 Pb6 109.62(3) . . ?
Pb1 Pb2 Pb7 110.44(3) . . ?
Pb6 Pb2 Pb7 63.86(2) . . ?
Pb1 Pb2 Pb3 57.43(2) . . ?
Pb6 Pb2 Pb3 101.44(2) . . ?
Pb7 Pb2 Pb3 57.30(2) . . ?
Pb1 Pb2 Pb5 56.90(2) . . ?
Pb6 Pb2 Pb5 57.04(2) . . ?
Pb7 Pb2 Pb5 102.04(2) . . ?
Pb3 Pb2 Pb5 89.64(3) . . ?
Pb1 Pb3 Pb7 110.72(2) . . ?
Pb1 Pb3 Pb8 110.40(2) . . ?
Pb7 Pb3 Pb8 61.88(2) . . ?
Pb1 Pb3 Pb4 57.64(2) . . ?
Pb7 Pb3 Pb4 102.59(2) . . ?
Pb8 Pb3 Pb4 58.11(2) . . ?
Pb1 Pb3 Pb2 56.77(2) . . ?
Pb7 Pb3 Pb2 58.27(2) . . ?
Pb8 Pb3 Pb2 100.74(2) . . ?
Pb4 Pb3 Pb2 90.38(2) . . ?
Pb1 Pb4 Pb9 109.98(2) . . ?
Pb1 Pb4 Pb8 110.54(3) . . ?
Pb9 Pb4 Pb8 60.18(2) . . ?
Pb1 Pb4 Pb3 57.11(2) . . ?
Pb9 Pb4 Pb3 100.93(3) . . ?
Pb8 Pb4 Pb3 58.80(2) . . ?
Pb1 Pb4 Pb5 56.78(2) . . ?
Pb9 Pb4 Pb5 58.23(2) . . ?
Pb8 Pb4 Pb5 100.62(3) . . ?
Pb3 Pb4 Pb5 90.03(2) . . ?
Pb1 Pb5 Pb6 110.26(3) . . ?
Pb1 Pb5 Pb9 110.63(2) . . ?
Pb6 Pb5 Pb9 61.83(2) . . ?
Pb1 Pb5 Pb4 57.71(2) . . ?
Pb6 Pb5 Pb4 101.75(3) . . ?
Pb9 Pb5 Pb4 58.01(2) . . ?
Pb1 Pb5 Pb2 56.65(2) . . ?
Pb6 Pb5 Pb2 57.97(2) . . ?
Pb9 Pb5 Pb2 100.88(2) . . ?
Pb4 Pb5 Pb2 89.95(2) . . ?
W10 Pb6 Pb5 115.70(3) . . ?
W10 Pb6 Pb2 112.52(2) . . ?
Pb5 Pb6 Pb2 64.99(2) . . ?
W10 Pb6 Pb9 59.56(2) . . ?
Pb5 Pb6 Pb9 59.93(2) . . ?
Pb2 Pb6 Pb9 104.42(3) . . ?
W10 Pb6 Pb7 56.93(2) . . ?
Pb5 Pb6 Pb7 103.59(3) . . ?
Pb2 Pb6 Pb7 58.14(2) . . ?
Pb9 Pb6 Pb7 89.52(3) . . ?
W10 Pb7 Pb3 114.70(3) . . ?
W10 Pb7 Pb2 111.89(2) . . ?
Pb3 Pb7 Pb2 64.43(2) . . ?
W10 Pb7 Pb8 58.24(2) . . ?
Pb3 Pb7 Pb8 60.36(2) . . ?
Pb2 Pb7 Pb8 103.92(3) . . ?
W10 Pb7 Pb6 56.41(2) . . ?
Pb3 Pb7 Pb6 102.31(3) . . ?
Pb2 Pb7 Pb6 58.00(2) . . ?
Pb8 Pb7 Pb6 87.81(3) . . ?
W10 Pb8 Pb9 59.67(2) . . ?
W10 Pb8 Pb4 114.56(3) . . ?
Pb9 Pb8 Pb4 59.62(2) . . ?
W10 Pb8 Pb3 111.54(2) . . ?
Pb9 Pb8 Pb3 103.57(2) . . ?
Pb4 Pb8 Pb3 63.09(2) . . ?
W10 Pb8 Pb7 57.43(2) . . ?
Pb9 Pb8 Pb7 91.82(3) . . ?
Pb4 Pb8 Pb7 103.23(2) . . ?
Pb3 Pb8 Pb7 57.76(2) . . ?
W10 Pb9 Pb4 113.89(3) . . ?
W10 Pb9 Pb5 111.66(2) . . ?
Pb4 Pb9 Pb5 63.75(2) . . ?
W10 Pb9 Pb8 58.36(2) . . ?
Pb4 Pb9 Pb8 60.20(2) . . ?
Pb5 Pb9 Pb8 104.53(2) . . ?
W10 Pb9 Pb6 56.91(2) . . ?
Pb4 Pb9 Pb6 103.30(2) . . ?
Pb5 Pb9 Pb6 58.24(2) . . ?
Pb8 Pb9 Pb6 90.84(3) . . ?
C12 W10 C13 87.0(5) . . ?
C12 W10 C11 94.9(5) . . ?
C13 W10 C11 91.1(5) . . ?
C12 W10 Pb6 162.9(3) . . ?
C13 W10 Pb6 85.1(4) . . ?
C11 W10 Pb6 100.4(4) . . ?
C12 W10 Pb7 97.3(3) . . ?
C13 W10 Pb7 82.5(3) . . ?
C11 W10 Pb7 165.9(4) . . ?
Pb6 W10 Pb7 66.67(2) . . ?
C12 W10 Pb8 80.0(3) . . ?
C13 W10 Pb8 142.1(3) . . ?
C11 W10 Pb8 125.2(4) . . ?
Pb6 W10 Pb8 97.13(2) . . ?
Pb7 W10 Pb8 64.33(2) . . ?
C12 W10 Pb9 127.2(3) . . ?
C13 W10 Pb9 145.2(4) . . ?
C11 W10 Pb9 80.7(4) . . ?
Pb6 W10 Pb9 63.53(2) . . ?
Pb7 W10 Pb9 97.38(3) . . ?
Pb8 W10 Pb9 61.97(2) . . ?
O11 C11 W10 177.6(10) . . ?
O12 C12 W10 178.8(8) . . ?
O13 C13 W10 178.6(9) . . ?
C1 W2 C2 88.4(5) . . ?
C1 W2 C3 85.5(5) . . ?
C2 W2 C3 87.2(4) . . ?
C1 W2 N4 173.0(4) . . ?
C2 W2 N4 98.0(4) . . ?
C3 W2 N4 97.5(4) . . ?
C1 W2 N3 99.2(4) . . ?
C2 W2 N3 172.3(4) . . ?
C3 W2 N3 94.2(4) . . ?
N4 W2 N3 74.3(3) . . ?
C1 W2 N1 95.7(4) . . ?
C2 W2 N1 97.5(4) . . ?
C3 W2 N1 175.1(4) . . ?
N4 W2 N1 80.7(4) . . ?
N3 W2 N1 80.9(3) . . ?
O1 C1 W2 179.2(9) . . ?
O2 C2 W2 179.2(10) . . ?
O3 C3 W2 175.9(10) . . ?
C4 N1 W2 123.8(9) . . ?
C4 N1 H1A 106.4(6) . . ?
W2 N1 H1A 106.4(2) . . ?
C4 N1 H1B 106.4(7) . . ?
W2 N1 H1B 106.4(2) . . ?
H1A N1 H1B 106.5 . . ?
N1 C4 C5 111.9(13) . . ?
N1 C4 H4C 109.2(6) . . ?
C5 C4 H4C 109.2(8) . . ?
N1 C4 H4D 109.2(7) . . ?
C5 C4 H4D 109.2(8) . . ?
H4C C4 H4D 107.9 . . ?
N2 C5 C4 111.9(14) . . ?
N2 C5 H5A 109.2(9) . . ?
C4 C5 H5A 109.2(9) . . ?
N2 C5 H5B 109.2(9) . . ?
C4 C5 H5B 109.2(8) . . ?
H5A C5 H5B 107.9 . . ?
C5 N2 H2A 120.0(9) . . ?
C5 N2 H2B 120.0(9) . . ?
H2A N2 H2B 120.0 . . ?
C6 N3 W2 113.1(6) . . ?
C6 N3 H3A 109.0(6) . . ?
W2 N3 H3A 109.0(2) . . ?
C6 N3 H3B 109.0(6) . . ?
W2 N3 H3B 109.0(2) . . ?
H3A N3 H3B 107.8 . . ?
N3 C6 C7 110.5(11) . . ?
N3 C6 H6A 109.6(6) . . ?
C7 C6 H6A 109.6(6) . . ?
N3 C6 H6B 109.6(5) . . ?
C7 C6 H6B 109.6(7) . . ?
H6A C6 H6B 108.1 . . ?
C6 C7 N4 108.0(10) . . ?
C6 C7 H7A 110.1(7) . . ?
N4 C7 H7A 110.1(6) . . ?
C6 C7 H7B 110.1(6) . . ?
N4 C7 H7B 110.1(7) . . ?
H7A C7 H7B 108.4 . . ?
C7 N4 W2 111.5(6) . . ?
C7 N4 H4A 109.3(7) . . ?
W2 N4 H4A 109.3(2) . . ?
C7 N4 H4B 109.3(6) . . ?
W2 N4 H4B 109.3(2) . . ?
H4A N4 H4B 108.0 . . ?
O103 K1 O106 58.1(2) . . ?
O103 K1 O115 97.9(2) . . ?
O106 K1 O115 115.0(2) . . ?
O103 K1 O112 137.8(2) . . ?
O106 K1 O112 97.5(2) . . ?
O115 K1 O112 59.1(2) . . ?
O103 K1 O123 114.1(2) . . ?
O106 K1 O123 97.3(2) . . ?
O115 K1 O123 143.4(2) . . ?
O112 K1 O123 102.0(2) . . ?
O103 K1 O120 98.8(2) . . ?
O106 K1 O120 138.7(3) . . ?
O115 K1 O120 100.9(2) . . ?
O112 K1 O120 118.9(2) . . ?
O123 K1 O120 58.6(2) . . ?
O103 K1 N109 118.8(3) . . ?
O106 K1 N109 62.0(2) . . ?
O115 K1 N109 117.7(3) . . ?
O112 K1 N109 60.0(3) . . ?
O123 K1 N109 62.3(2) . . ?
O120 K1 N109 118.7(2) . . ?
O103 K1 N100 61.8(2) . . ?
O106 K1 N100 118.7(2) . . ?
O115 K1 N100 62.2(3) . . ?
O112 K1 N100 119.8(3) . . ?
O123 K1 N100 117.3(2) . . ?
O120 K1 N100 60.7(2) . . ?
N109 K1 N100 179.3(2) . . ?
C117 N100 C118 108.7(10) . . ?
C117 N100 C101 110.6(9) . . ?
C118 N100 C101 109.3(9) . . ?
C117 N100 K1 108.2(7) . . ?
C118 N100 K1 111.4(7) . . ?
C101 N100 K1 108.6(7) . . ?
N100 C101 C102 113.7(10) . . ?
N100 C101 H10A 108.8(7) . . ?
C102 C101 H10A 108.8(6) . . ?
N100 C101 H10B 108.8(6) . . ?
C102 C101 H10B 108.8(7) . . ?
H10A C101 H10B 107.7 . . ?
O103 C102 C101 109.0(8) . . ?
O103 C102 H10C 109.9(6) . . ?
C101 C102 H10C 109.9(7) . . ?
O103 C102 H10D 109.9(6) . . ?
C101 C102 H10D 109.9(7) . . ?
H10C C102 H10D 108.3 . . ?
C104 O103 C102 110.9(7) . . ?
C104 O103 K1 120.9(6) . . ?
C102 O103 K1 117.2(6) . . ?
O103 C104 C105 109.5(8) . . ?
O103 C104 H10E 109.8(6) . . ?
C105 C104 H10E 109.8(6) . . ?
O103 C104 H10F 109.8(6) . . ?
C105 C104 H10F 109.8(7) . . ?
H10E C104 H10F 108.2 . . ?
O106 C105 C104 109.3(11) . . ?
O106 C105 H10G 109.8(5) . . ?
C104 C105 H10G 109.8(6) . . ?
O106 C105 H10H 109.8(5) . . ?
C104 C105 H10H 109.8(5) . . ?
H10G C105 H10H 108.3 . . ?
C105 O106 C107 111.3(9) . . ?
C105 O106 K1 118.1(6) . . ?
C107 O106 K1 118.3(5) . . ?
O106 C107 C108 110.9(10) . . ?
O106 C107 H10I 109.5(5) . . ?
C108 C107 H10I 109.5(6) . . ?
O106 C107 H10J 109.5(6) . . ?
C108 C107 H10J 109.5(7) . . ?
H10I C107 H10J 108.0 . . ?
C107 C108 N109 114.3(9) . . ?
C107 C108 H10K 108.7(7) . . ?
N109 C108 H10K 108.7(6) . . ?
C107 C108 H10L 108.7(7) . . ?
N109 C108 H10L 108.7(6) . . ?
H10K C108 H10L 107.6 . . ?
C110 N109 C125 109.2(9) . . ?
C110 N109 C108 108.8(8) . . ?
C125 N109 C108 109.1(10) . . ?
C110 N109 K1 111.7(8) . . ?
C125 N109 K1 109.1(7) . . ?
C108 N109 K1 108.9(6) . . ?
N109 C110 C111 112.8(9) . . ?
N109 C110 H11A 109.0(7) . . ?
C111 C110 H11A 109.0(7) . . ?
N109 C110 H11B 109.0(5) . . ?
C111 C110 H11B 109.0(6) . . ?
H11A C110 H11B 107.8 . . ?
O112 C111 C110 109.6(10) . . ?
O112 C111 H11C 109.8(7) . . ?
C110 C111 H11C 109.8(7) . . ?
O112 C111 H11D 109.8(5) . . ?
C110 C111 H11D 109.8(6) . . ?
H11C C111 H11D 108.2 . . ?
C111 O112 C113 112.5(9) . . ?
C111 O112 K1 120.8(8) . . ?
C113 O112 K1 114.9(7) . . ?
O112 C113 C114 110.5(9) . . ?
O112 C113 H11E 109.5(6) . . ?
C114 C113 H11E 109.5(6) . . ?
O112 C113 H11F 109.5(6) . . ?
C114 C113 H11F 109.5(8) . . ?
H11E C113 H11F 108.1 . . ?
O115 C114 C113 109.3(11) . . ?
O115 C114 H11G 109.8(5) . . ?
C113 C114 H11G 109.8(6) . . ?
O115 C114 H11H 109.8(6) . . ?
C113 C114 H11H 109.8(7) . . ?
H11G C114 H11H 108.3 . . ?
C114 O115 C116 111.3(10) . . ?
C114 O115 K1 117.2(7) . . ?
C116 O115 K1 115.4(7) . . ?
O115 C116 C117 108.8(11) . . ?
O115 C116 H11I 109.9(6) . . ?
C117 C116 H11I 109.9(7) . . ?
O115 C116 H11J 109.9(5) . . ?
C117 C116 H11J 109.9(6) . . ?
H11I C116 H11J 108.3 . . ?
N100 C117 C116 116.8(10) . . ?
N100 C117 H11K 108.1(7) . . ?
C116 C117 H11K 108.1(8) . . ?
N100 C117 H11P 108.1(6) . . ?
C116 C117 H11P 108.1(6) . . ?
H11K C117 H11P 107.3 . . ?
N100 C118 C119 113.2(10) . . ?
N100 C118 H11L 108.9(6) . . ?
C119 C118 H11L 108.9(7) . . ?
N100 C118 H11M 108.9(7) . . ?
C119 C118 H11M 108.9(7) . . ?
H11L C118 H11M 107.8 . . ?
O120 C119 C118 109.3(10) . . ?
O120 C119 H11N 109.8(5) . . ?
C118 C119 H11N 109.8(6) . . ?
O120 C119 H11O 109.8(7) . . ?
C118 C119 H11O 109.8(7) . . ?
H11N C119 H11O 108.3 . . ?
C121 O120 C119 111.2(9) . . ?
C121 O120 K1 117.2(7) . . ?
C119 O120 K1 117.4(5) . . ?
O120 C121 C122 110.2(10) . . ?
O120 C121 H12A 109.6(7) . . ?
C122 C121 H12A 109.6(8) . . ?
O120 C121 H12B 109.6(6) . . ?
C122 C121 H12B 109.6(5) . . ?
H12A C121 H12B 108.1 . . ?
O123 C122 C121 109.1(9) . . ?
O123 C122 H12C 109.9(7) . . ?
C121 C122 H12C 109.9(8) . . ?
O123 C122 H12D 109.9(7) . . ?
C121 C122 H12D 109.9(7) . . ?
H12C C122 H12D 108.3 . . ?
C124 O123 C122 109.9(8) . . ?
C124 O123 K1 114.6(6) . . ?
C122 O123 K1 115.1(7) . . ?
O123 C124 C125 110.2(8) . . ?
O123 C124 H12E 109.6(6) . . ?
C125 C124 H12E 109.6(7) . . ?
O123 C124 H12F 109.6(6) . . ?
C125 C124 H12F 109.6(7) . . ?
H12E C124 H12F 108.1 . . ?
N109 C125 C124 114.0(11) . . ?
N109 C125 H12G 108.8(6) . . ?
C124 C125 H12G 108.8(6) . . ?
N109 C125 H12H 108.8(6) . . ?
C124 C125 H12H 108.8(7) . . ?
H12G C125 H12H 107.7 . . ?
O203 K2 O212 140.4(2) . . ?
O203 K2 O223 115.4(2) . . ?
O212 K2 O223 99.1(3) . . ?
O203 K2 O215 97.8(2) . . ?
O212 K2 O215 61.2(3) . . ?
O223 K2 O215 140.7(2) . . ?
O203 K2 O206 60.3(2) . . ?
O212 K2 O206 97.9(3) . . ?
O223 K2 O206 97.7(2) . . ?
O215 K2 O206 117.4(3) . . ?
O203 K2 O220 97.4(2) . . ?
O212 K2 O220 117.7(3) . . ?
O223 K2 O220 59.0(3) . . ?
O215 K2 O220 98.3(3) . . ?
O206 K2 O220 139.0(3) . . ?
O203 K2 N200 61.4(3) . . ?
O212 K2 N200 120.1(3) . . ?
O223 K2 N200 117.0(3) . . ?
O215 K2 N200 60.6(3) . . ?
O206 K2 N200 120.5(2) . . ?
O220 K2 N200 59.5(3) . . ?
O203 K2 N209 117.9(3) . . ?
O212 K2 N209 62.4(3) . . ?
O223 K2 N209 60.6(3) . . ?
O215 K2 N209 122.1(3) . . ?
O206 K2 N209 59.4(2) . . ?
O220 K2 N209 118.5(3) . . ?
N200 K2 N209 177.2(3) . . ?
C218 N200 C201 110.3(12) . . ?
C218 N200 C217 108.1(11) . . ?
C201 N200 C217 110.8(9) . . ?
C218 N200 K2 111.0(8) . . ?
C201 N200 K2 108.1(8) . . ?
C217 N200 K2 108.6(9) . . ?
N200 C201 C202 115.1(12) . . ?
N200 C201 H20A 108.5(7) . . ?
C202 C201 H20A 108.5(7) . . ?
N200 C201 H20B 108.5(7) . . ?
C202 C201 H20B 108.5(8) . . ?
H20A C201 H20B 107.5 . . ?
O203 C202 C201 109.0(9) . . ?
O203 C202 H20C 109.9(6) . . ?
C201 C202 H20C 109.9(8) . . ?
O203 C202 H20D 109.9(7) . . ?
C201 C202 H20D 109.9(8) . . ?
H20C C202 H20D 108.3 . . ?
C204 O203 C202 109.7(8) . . ?
C204 O203 K2 116.8(7) . . ?
C202 O203 K2 119.3(6) . . ?
O203 C204 C205 110.0(8) . . ?
O203 C204 H20E 109.7(6) . . ?
C205 C204 H20E 109.7(7) . . ?
O203 C204 H20F 109.7(6) . . ?
C205 C204 H20F 109.7(6) . . ?
H20E C204 H20F 108.2 . . ?
O206 C205 C204 111.1(9) . . ?
O206 C205 H20G 109.4(5) . . ?
C204 C205 H20G 109.4(7) . . ?
O206 C205 H20H 109.4(6) . . ?
C204 C205 H20H 109.4(5) . . ?
H20G C205 H20H 108.0 . . ?
C207 O206 C205 111.5(9) . . ?
C207 O206 K2 117.4(5) . . ?
C205 O206 K2 113.8(7) . . ?
O206 C207 C208 111.2(11) . . ?
O206 C207 H20I 109.4(5) . . ?
C208 C207 H20I 109.4(7) . . ?
O206 C207 H20J 109.4(7) . . ?
C208 C207 H20J 109.4(7) . . ?
H20I C207 H20J 108.0 . . ?
C207 C208 N209 112.6(12) . . ?
C207 C208 H20K 109.1(7) . . ?
N209 C208 H20K 109.1(7) . . ?
C207 C208 H20L 109.1(8) . . ?
N209 C208 H20L 109.1(7) . . ?
H20K C208 H20L 107.8 . . ?
C225 N209 C210 108.7(9) . . ?
C225 N209 C208 110.5(10) . . ?
C210 N209 C208 109.8(11) . . ?
C225 N209 K2 109.8(8) . . ?
C210 N209 K2 107.0(8) . . ?
C208 N209 K2 111.0(7) . . ?
N209 C210 C211 114.3(10) . . ?
N209 C210 H21A 108.7(8) . . ?
C211 C210 H21A 108.7(9) . . ?
N209 C210 H21B 108.7(6) . . ?
C211 C210 H21B 108.7(7) . . ?
H21A C210 H21B 107.6 . . ?
O212 C211 C210 109.9(12) . . ?
O212 C211 H21C 109.7(7) . . ?
C210 C211 H21C 109.7(8) . . ?
O212 C211 H21D 109.7(6) . . ?
C210 C211 H21D 109.7(7) . . ?
H21C C211 H21D 108.2 . . ?
C213 O212 C211 112.6(11) . . ?
C213 O212 K2 113.4(8) . . ?
C211 O212 K2 116.1(8) . . ?
O212 C213 C214 110.3(13) . . ?
O212 C213 H21E 109.6(7) . . ?
C214 C213 H21E 109.6(7) . . ?
O212 C213 H21F 109.6(7) . . ?
C214 C213 H21F 109.6(9) . . ?
H21E C213 H21F 108.1 . . ?
O215 C214 C213 110.3(13) . . ?
O215 C214 H21G 109.6(7) . . ?
C213 C214 H21G 109.6(7) . . ?
O215 C214 H21H 109.6(7) . . ?
C213 C214 H21H 109.6(9) . . ?
H21G C214 H21H 108.1 . . ?
C216 O215 C214 111.6(11) . . ?
C216 O215 K2 119.8(8) . . ?
C214 O215 K2 114.2(8) . . ?
O215 C216 C217 111.1(12) . . ?
O215 C216 H21I 109.4(7) . . ?
C217 C216 H21I 109.4(8) . . ?
O215 C216 H21J 109.4(6) . . ?
C217 C216 H21J 109.4(8) . . ?
H21I C216 H21J 108.0 . . ?
C216 C217 N200 114.9(11) . . ?
C216 C217 H21K 108.5(8) . . ?
N200 C217 H21K 108.5(6) . . ?
C216 C217 H21L 108.5(9) . . ?
N200 C217 H21L 108.5(8) . . ?
H21K C217 H21L 107.5 . . ?
N200 C218 C219 113.7(12) . . ?
N200 C218 H21M 108.8(8) . . ?
C219 C218 H21M 108.8(9) . . ?
N200 C218 H21N 108.8(8) . . ?
C219 C218 H21N 108.8(7) . . ?
H21M C218 H21N 107.7 . . ?
O220 C219 C218 108.2(12) . . ?
O220 C219 H21O 110.1(5) . . ?
C218 C219 H21O 110.1(7) . . ?
O220 C219 H21P 110.1(7) . . ?
C218 C219 H21P 110.1(7) . . ?
H21O C219 H21P 108.4 . . ?
C219 O220 C221 110.4(11) . . ?
C219 O220 K2 119.0(6) . . ?
C221 O220 K2 112.9(7) . . ?
O220 C221 C222 111.0(12) . . ?
O220 C221 H22A 109.4(6) . . ?
C222 C221 H22A 109.4(8) . . ?
O220 C221 H22B 109.4(6) . . ?
C222 C221 H22B 109.4(6) . . ?
H22A C221 H22B 108.0 . . ?
O223 C222 C221 108.7(9) . . ?
O223 C222 H22C 110.0(7) . . ?
C221 C222 H22C 110.0(8) . . ?
O223 C222 H22D 110.0(7) . . ?
C221 C222 H22D 110.0(7) . . ?
H22C C222 H22D 108.3 . . ?
C224 O223 C222 108.9(8) . . ?
C224 O223 K2 119.1(7) . . ?
C222 O223 K2 119.3(7) . . ?
O223 C224 C225 109.6(9) . . ?
O223 C224 H22E 109.7(6) . . ?
C225 C224 H22E 109.7(7) . . ?
O223 C224 H22F 109.7(7) . . ?
C225 C224 H22F 109.7(8) . . ?
H22E C224 H22F 108.2 . . ?
N209 C225 C224 115.5(12) . . ?
N209 C225 H22G 108.4(8) . . ?
C224 C225 H22G 108.4(7) . . ?
N209 C225 H22H 108.4(7) . . ?
C224 C225 H22H 108.4(8) . . ?
H22G C225 H22H 107.5 . . ?
O306 K3 O323 96.1(3) . . ?
O306 K3 O312 95.9(3) . . ?
O323 K3 O312 99.8(2) . . ?
O306 K3 O315 116.4(3) . . ?
O323 K3 O315 142.4(2) . . ?
O312 K3 O315 60.5(2) . . ?
O306 K3 O320 137.2(4) . . ?
O323 K3 O320 60.6(3) . . ?
O312 K3 O320 121.7(2) . . ?
O315 K3 O320 100.6(3) . . ?
O306 K3 O303 63.1(4) . . ?
O323 K3 O303 113.7(3) . . ?
O312 K3 O303 141.4(3) . . ?
O315 K3 O303 98.3(3) . . ?
O320 K3 O303 92.3(3) . . ?
O306 K3 N309 59.6(3) . . ?
O323 K3 N309 60.5(3) . . ?
O312 K3 N309 60.1(3) . . ?
O315 K3 N309 119.3(3) . . ?
O320 K3 N309 120.1(3) . . ?
O303 K3 N309 120.7(3) . . ?
O306 K3 N300 119.6(3) . . ?
O323 K3 N300 119.9(3) . . ?
O312 K3 N300 120.2(3) . . ?
O315 K3 N300 60.8(2) . . ?
O320 K3 N300 60.5(3) . . ?
O303 K3 N300 58.6(3) . . ?
N309 K3 N300 179.2(2) . . ?
C317 N300 C318 110.8(9) . . ?
C317 N300 C301 109.6(9) . . ?
C318 N300 C301 110.4(10) . . ?
C317 N300 K3 108.9(8) . . ?
C318 N300 K3 107.0(8) . . ?
C301 N300 K3 110.1(8) . . ?
N300 C301 C302 113.1(12) . . ?
N300 C301 H30A 109.0(7) . . ?
C302 C301 H30A 109.0(8) . . ?
N300 C301 H30B 109.0(7) . . ?
C302 C301 H30B 109.0(9) . . ?
H30A C301 H30B 107.8 . . ?
O303 C302 C301 106.9(12) . . ?
O303 C302 H30C 110.3(6) . . ?
C301 C302 H30C 110.3(7) . . ?
O303 C302 H30D 110.3(9) . . ?
C301 C302 H30D 110.3(8) . . ?
H30C C302 H30D 108.6 . . ?
C302 O303 C304 108.7(13) . . ?
C302 O303 K3 118.4(7) . . ?
C304 O303 K3 104.5(10) . . ?
O303 C304 C305 93.3(16) . . ?
O303 C304 H30E 113.0(10) . . ?
C305 C304 H30E 113.1(15) . . ?
O303 C304 H30F 113.0(9) . . ?
C305 C304 H30F 113.0(12) . . ?
H30E C304 H30F 110.4 . . ?
C304 C305 O306 84.5(18) . . ?
C304 C305 H30G 114.5(12) . . ?
O306 C305 H30G 114.5(11) . . ?
C304 C305 H30H 114.6(15) . . ?
O306 C305 H30H 114.6(10) . . ?
H30G C305 H30H 111.7 . . ?
C307 O306 C305 98.9(15) . . ?
C307 O306 K3 121.6(7) . . ?
C305 O306 K3 103.1(12) . . ?
O306 C307 C308 104.9(13) . . ?
O306 C307 H30I 110.8(7) . . ?
C308 C307 H30I 110.8(8) . . ?
O306 C307 H30J 110.8(10) . . ?
C308 C307 H30J 110.8(9) . . ?
H30I C307 H30J 108.8 . . ?
N309 C308 C307 109.0(13) . . ?
N309 C308 H30K 109.9(8) . . ?
C307 C308 H30K 109.9(10) . . ?
N309 C308 H30L 109.9(8) . . ?
C307 C308 H30L 109.9(9) . . ?
H30K C308 H30L 108.3 . . ?
C310 N309 C325 108.9(8) . . ?
C310 N309 C308 107.9(12) . . ?
C325 N309 C308 109.6(11) . . ?
C310 N309 K3 109.4(8) . . ?
C325 N309 K3 109.9(8) . . ?
C308 N309 K3 111.1(9) . . ?
N309 C310 C311 113.6(11) . . ?
N309 C310 H31A 108.8(7) . . ?
C311 C310 H31A 108.8(10) . . ?
N309 C310 H31B 108.8(6) . . ?
C311 C310 H31B 108.8(8) . . ?
H31A C310 H31B 107.7 . . ?
O312 C311 C310 110.3(14) . . ?
O312 C311 H31C 109.6(7) . . ?
C310 C311 H31C 109.6(8) . . ?
O312 C311 H31D 109.6(7) . . ?
C310 C311 H31D 109.6(8) . . ?
H31C C311 H31D 108.1 . . ?
C311 O312 C313 111.9(11) . . ?
C311 O312 K3 118.8(8) . . ?
C313 O312 K3 115.1(7) . . ?
O312 C313 C314 110.1(10) . . ?
O312 C313 H31E 109.6(5) . . ?
C314 C313 H31E 109.6(6) . . ?
O312 C313 H31F 109.6(6) . . ?
C314 C313 H31F 109.6(6) . . ?
H31E C313 H31F 108.2 . . ?
O315 C314 C313 110.0(8) . . ?
O315 C314 H31G 109.7(5) . . ?
C313 C314 H31G 109.7(6) . . ?
O315 C314 H31H 109.7(6) . . ?
C313 C314 H31H 109.7(7) . . ?
H31G C314 H31H 108.2 . . ?
C316 O315 C314 110.3(8) . . ?
C316 O315 K3 116.3(7) . . ?
C314 O315 K3 113.6(6) . . ?
O315 C316 C317 109.6(9) . . ?
O315 C316 H31I 109.8(6) . . ?
C317 C316 H31I 109.8(7) . . ?
O315 C316 H31J 109.8(5) . . ?
C317 C316 H31J 109.8(6) . . ?
H31I C316 H31J 108.2 . . ?
N300 C317 C316 115.4(10) . . ?
N300 C317 H31K 108.4(7) . . ?
C316 C317 H31K 108.4(7) . . ?
N300 C317 H31L 108.4(5) . . ?
C316 C317 H31L 108.4(6) . . ?
H31K C317 H31L 107.5 . . ?
N300 C318 C319 114.7(12) . . ?
N300 C318 H31M 108.6(7) . . ?
C319 C318 H31M 108.6(9) . . ?
N300 C318 H31N 108.6(6) . . ?
C319 C318 H31N 108.6(7) . . ?
H31M C318 H31N 107.6 . . ?
O320 C319 C318 110.3(13) . . ?
O320 C319 H31O 109.6(7) . . ?
C318 C319 H31O 109.6(9) . . ?
O320 C319 H31P 109.6(8) . . ?
C318 C319 H31P 109.6(7) . . ?
H31O C319 H31P 108.1 . . ?
C319 O320 C321 111.0(11) . . ?
C319 O320 K3 118.3(8) . . ?
C321 O320 K3 112.0(8) . . ?
O320 C321 C322 109.8(11) . . ?
O320 C321 H32A 109.7(6) . . ?
C322 C321 H32A 109.7(7) . . ?
O320 C321 H32B 109.7(7) . . ?
C322 C321 H32B 109.7(7) . . ?
H32A C321 H32B 108.2 . . ?
O323 C322 C321 108.8(9) . . ?
O323 C322 H32C 109.9(6) . . ?
C321 C322 H32C 109.9(7) . . ?
O323 C322 H32D 109.9(7) . . ?
C321 C322 H32D 109.9(7) . . ?
H32C C322 H32D 108.3 . . ?
C322 O323 C324 110.8(8) . . ?
C322 O323 K3 115.3(7) . . ?
C324 O323 K3 117.0(6) . . ?
O323 C324 C325 108.8(8) . . ?
O323 C324 H32E 109.9(6) . . ?
C325 C324 H32E 109.9(7) . . ?
O323 C324 H32F 109.9(5) . . ?
C325 C324 H32F 109.9(6) . . ?
H32E C324 H32F 108.3 . . ?
N309 C325 C324 111.8(10) . . ?
N309 C325 H32G 109.3(7) . . ?
C324 C325 H32G 109.3(6) . . ?
N309 C325 H32H 109.3(5) . . ?
C324 C325 H32H 109.3(6) . . ?
H32G C325 H32H 107.9 . . ?
O423 K4 O412 97.1(3) . . ?
O423 K4 O415 140.7(3) . . ?
O412 K4 O415 61.3(3) . . ?
O423 K4 O406 99.1(3) . . ?
O412 K4 O406 95.3(3) . . ?
O415 K4 O406 114.4(3) . . ?
O423 K4 O420 61.0(2) . . ?
O412 K4 O420 117.2(3) . . ?
O415 K4 O420 98.1(3) . . ?
O406 K4 O420 142.6(3) . . ?
O423 K4 O403 120.0(3) . . ?
O412 K4 O403 136.7(3) . . ?
O415 K4 O403 95.3(3) . . ?
O406 K4 O403 59.7(2) . . ?
O420 K4 O403 100.9(3) . . ?
O423 K4 N409 60.5(2) . . ?
O412 K4 N409 60.1(3) . . ?
O415 K4 N409 119.6(3) . . ?
O406 K4 N409 59.4(3) . . ?
O420 K4 N409 120.2(3) . . ?
O403 K4 N409 118.0(3) . . ?
O423 K4 N400 119.5(3) . . ?
O412 K4 N400 121.1(3) . . ?
O415 K4 N400 61.3(3) . . ?
O406 K4 N400 119.4(3) . . ?
O420 K4 N400 60.2(3) . . ?
O403 K4 N400 60.7(3) . . ?
N409 K4 N400 178.6(4) . . ?
C401 N400 C418 110.9(11) . . ?
C401 N400 C417 110.0(12) . . ?
C418 N400 C417 108.9(12) . . ?
C401 N400 K4 109.4(8) . . ?
C418 N400 K4 109.7(8) . . ?
C417 N400 K4 108.0(6) . . ?
N400 C401 C402 116.2(11) . . ?
N400 C401 H40A 108.2(8) . . ?
C402 C401 H40A 108.2(8) . . ?
N400 C401 H40L 108.2(8) . . ?
C402 C401 H40L 108.2(10) . . ?
H40A C401 H40L 107.4 . . ?
O403 C402 C401 109.1(12) . . ?
O403 C402 H40B 109.9(8) . . ?
C401 C402 H40B 109.9(8) . . ?
O403 C402 H40C 109.8(7) . . ?
C401 C402 H40C 109.8(9) . . ?
H40B C402 H40C 108.3 . . ?
C404 O403 C402 110.9(11) . . ?
C404 O403 K4 114.1(7) . . ?
C402 O403 K4 118.9(9) . . ?
O403 C404 C405 110.0(12) . . ?
O403 C404 H40D 109.7(8) . . ?
C405 C404 H40D 109.7(7) . . ?
O403 C404 H40E 109.7(7) . . ?
C405 C404 H40E 109.7(9) . . ?
H40D C404 H40E 108.2 . . ?
O406 C405 C404 109.3(12) . . ?
O406 C405 H40F 109.8(6) . . ?
C404 C405 H40F 109.8(7) . . ?
O406 C405 H40G 109.8(6) . . ?
C404 C405 H40G 109.8(8) . . ?
H40F C405 H40G 108.3 . . ?
C407 O406 C405 110.8(11) . . ?
C407 O406 K4 119.5(8) . . ?
C405 O406 K4 116.2(6) . . ?
O406 C407 C408 110.3(12) . . ?
O406 C407 H40H 109.6(7) . . ?
C408 C407 H40H 109.6(6) . . ?
O406 C407 H40I 109.6(6) . . ?
C408 C407 H40I 109.6(8) . . ?
H40H C407 H40I 108.1 . . ?
N409 C408 C407 113.9(9) . . ?
N409 C408 H40J 108.8(6) . . ?
C407 C408 H40J 108.8(7) . . ?
N409 C408 H40K 108.8(8) . . ?
C407 C408 H40K 108.8(8) . . ?
H40J C408 H40K 107.7 . . ?
C408 N409 C410 109.5(9) . . ?
C408 N409 C425 110.9(11) . . ?
C410 N409 C425 110.1(11) . . ?
C408 N409 K4 110.3(7) . . ?
C410 N409 K4 109.1(7) . . ?
C425 N409 K4 106.8(6) . . ?
N409 C410 C411 113.7(11) . . ?
N409 C410 H41A 108.8(6) . . ?
C411 C410 H41A 108.8(6) . . ?
N409 C410 H41B 108.8(7) . . ?
C411 C410 H41B 108.8(9) . . ?
H41A C410 H41B 107.7 . . ?
O412 C411 C410 112.1(10) . . ?
O412 C411 H41C 109.2(8) . . ?
C410 C411 H41C 109.2(8) . . ?
O412 C411 H41D 109.2(7) . . ?
C410 C411 H41D 109.2(8) . . ?
H41C C411 H41D 107.9 . . ?
C413 O412 C411 111.3(9) . . ?
C413 O412 K4 115.6(7) . . ?
C411 O412 K4 120.3(8) . . ?
O412 C413 C414 110.6(10) . . ?
O412 C413 H41E 109.5(7) . . ?
C414 C413 H41E 109.5(8) . . ?
O412 C413 H41F 109.5(7) . . ?
C414 C413 H41F 109.5(8) . . ?
H41E C413 H41F 108.1 . . ?
O415 C414 C413 111.2(12) . . ?
O415 C414 H41G 109.4(7) . . ?
C413 C414 H41G 109.4(8) . . ?
O415 C414 H41H 109.4(7) . . ?
C413 C414 H41H 109.4(8) . . ?
H41G C414 H41H 108.0 . . ?
C416 O415 C414 111.6(11) . . ?
C416 O415 K4 116.2(8) . . ?
C414 O415 K4 113.0(8) . . ?
O415 C416 C417 111.8(13) . . ?
O415 C416 H41I 109.2(8) . . ?
C417 C416 H41I 109.2(9) . . ?
O415 C416 H41J 109.2(7) . . ?
C417 C416 H41J 109.2(8) . . ?
H41I C416 H41J 107.9 . . ?
C416 C417 N400 114.3(12) . . ?
C416 C417 H41K 108.7(8) . . ?
N400 C417 H41K 108.7(8) . . ?
C416 C417 H41L 108.7(8) . . ?
N400 C417 H41L 108.7(6) . . ?
H41K C417 H41L 107.6 . . ?
N400 C418 C419 113.4(12) . . ?
N400 C418 H41M 108.9(7) . . ?
C419 C418 H41M 108.9(7) . . ?
N400 C418 H41N 108.9(9) . . ?
C419 C418 H41N 108.9(10) . . ?
H41M C418 H41N 107.7 . . ?
O420 C419 C418 108.4(11) . . ?
O420 C419 H41O 110.0(7) . . ?
C418 C419 H41O 110.0(8) . . ?
O420 C419 H41P 110.0(8) . . ?
C418 C419 H41P 110.0(10) . . ?
H41O C419 H41P 108.4 . . ?
C419 O420 C421 110.6(10) . . ?
C419 O420 K4 116.9(8) . . ?
C421 O420 K4 114.8(6) . . ?
O420 C421 C422 110.4(10) . . ?
O420 C421 H42A 109.6(8) . . ?
C422 C421 H42A 109.6(8) . . ?
O420 C421 H42B 109.6(6) . . ?
C422 C421 H42B 109.6(7) . . ?
H42A C421 H42B 108.1 . . ?
O423 C422 C421 108.9(10) . . ?
O423 C422 H42C 109.9(7) . . ?
C421 C422 H42C 109.9(8) . . ?
O423 C422 H42D 109.9(6) . . ?
C421 C422 H42D 109.9(7) . . ?
H42C C422 H42D 108.3 . . ?
C424 O423 C422 110.3(9) . . ?
C424 O423 K4 120.1(7) . . ?
C422 O423 K4 114.1(7) . . ?
O423 C424 C425 109.3(12) . . ?
O423 C424 H42E 109.8(7) . . ?
C425 C424 H42E 109.8(9) . . ?
O423 C424 H42F 109.8(7) . . ?
C425 C424 H42F 109.8(9) . . ?
H42E C424 H42F 108.3 . . ?
C424 C425 N409 115.3(12) . . ?
C424 C425 H42G 108.5(9) . . ?
N409 C425 H42G 108.5(8) . . ?
C424 C425 H42H 108.5(7) . . ?
N409 C425 H42H 108.5(6) . . ?
H42G C425 H42H 107.5 . . ?
C501 N500 H50A 120.0(7) . . ?
C501 N500 H50B 120.0(7) . . ?
H50A N500 H50B 120.0 . . ?
N500 C501 C502 109.0(12) . . ?
N500 C501 H50C 109.9(7) . . ?
C502 C501 H50C 109.9(7) . . ?
N500 C501 H50D 109.9(6) . . ?
C502 C501 H50D 109.9(7) . . ?
H50C C501 H50D 108.3 . . ?
N503 C502 C501 113.8(12) . . ?
N503 C502 H50E 108.8(8) . . ?
C501 C502 H50E 108.8(7) . . ?
N503 C502 H50F 108.8(7) . . ?
C501 C502 H50F 108.8(8) . . ?
H50E C502 H50F 107.7 . . ?
C502 N503 H50G 120.0(8) . . ?
C502 N503 H50H 120.0(8) . . ?
H50G N503 H50H 120.0 . . ?
C511 N510 H51A 120.0(9) . . ?
C511 N510 H51B 120.0(9) . . ?
H51A N510 H51B 120.0 . . ?
N510 C511 C512 117.0(16) . . ?
N510 C511 H51C 108.0(12) . . ?
C512 C511 H51C 108.0(12) . . ?
N510 C511 H51D 108.1(11) . . ?
C512 C511 H51D 108.1(12) . . ?
H51C C511 H51D 107.3 . . ?
N513 C512 C511 117.5(16) . . ?
N513 C512 H51E 107.9(11) . . ?
C511 C512 H51E 107.9(12) . . ?
N513 C512 H51F 107.9(12) . . ?
C511 C512 H51F 107.9(13) . . ?
H51E C512 H51F 107.2 . . ?
C512 N513 H51G 120.0(9) . . ?
C512 N513 H51H 120.0(9) . . ?
H51G N513 H51H 120.0 . . ?
C521 N520 H52A 120.0(13) . . ?
C521 N520 H52B 120.0(14) . . ?
H52A N520 H52B 120.0 . . ?
N520 C521 C521 108.4(25) . 2_756 ?
N520 C521 H52C 110.0(14) . . ?
C521 C521 H52C 110.0(17) 2_756 . ?
N520 C521 H52D 110.0(13) . . ?
C521 C521 H52D 110.0(18) 2_756 . ?
H52C C521 H52D 108.4 . . ?
 
_refine_diff_density_max    3.616
_refine_diff_density_min   -3.203
_refine_diff_density_rms    0.348

#===END

data Pb9Mo(CO)34-
 
_audit_creation_method            SHELXL
_chemical_name_systematic
;
  ?
;
_chemical_name_common             ?
_chemical_formula_moiety          ?
_chemical_formula_structural      ?
_chemical_formula_analytical      ?
_chemical_formula_sum             'C87 H180 K4 Mo2 N17 O30 Pb9'
_chemical_formula_weight          4157.47
_chemical_melting_point           ?
_chemical_compound_source         ?
 
loop_
  _atom_type_symbol
  _atom_type_description
  _atom_type_scat_dispersion_real
  _atom_type_scat_dispersion_imag
  _atom_type_scat_source
  'C'  'C'   0.0033   0.0016
  'International Tables Vol C Tables 4.2.6.8 and 6.1.1.4'
  'H'  'H'   0.0000   0.0000
  'International Tables Vol C Tables 4.2.6.8 and 6.1.1.4'
  'N'  'N'   0.0061   0.0033
  'International Tables Vol C Tables 4.2.6.8 and 6.1.1.4'
  'O'  'O'   0.0106   0.0060
  'International Tables Vol C Tables 4.2.6.8 and 6.1.1.4'
  'K'  'K'   0.2009   0.2494
  'International Tables Vol C Tables 4.2.6.8 and 6.1.1.4'
  'Mo'  'Mo'  -1.6832   0.6857
  'International Tables Vol C Tables 4.2.6.8 and 6.1.1.4'
  'Pb'  'Pb'  -3.3944  10.1111
  'International Tables Vol C Tables 4.2.6.8 and 6.1.1.4'
 
_symmetry_cell_setting            ?
_symmetry_space_group_name_H-M    ?
 
loop_
  _symmetry_equiv_pos_as_xyz
  'x, y, z'
  '-x, -y, -z'
 
_cell_length_a                    16.319(3)
_cell_length_b                    17.078(3)
_cell_length_c                    24.827(5)
_cell_angle_alpha                 71.82(3)
_cell_angle_beta                  83.01(3)
_cell_angle_gamma                 81.73(3)
_cell_volume                      6483.7(21)
_cell_formula_units_Z             2
_cell_measurement_temperature     140(2)
_cell_measurement_reflns_used     ?
_cell_measurement_theta_min       ?
_cell_measurement_theta_max       ?
 
_exptl_crystal_description        ?
_exptl_crystal_colour             ?
_exptl_crystal_size_max           ?
_exptl_crystal_size_mid           ?
_exptl_crystal_size_min           ?
_exptl_crystal_density_meas       ?
_exptl_crystal_density_diffrn     2.130
_exptl_crystal_density_method     ?
_exptl_crystal_F_000              3918
_exptl_absorpt_coefficient_mu     12.022
_exptl_absorpt_correction_type    ?
_exptl_absorpt_correction_T_min   ?
_exptl_absorpt_correction_T_max   ?
 
_exptl_special_details
;
  ?
;
 
_diffrn_ambient_temperature       140(2)
_diffrn_radiation_wavelength      0.71073
_diffrn_radiation_type            MoK\a
_diffrn_radiation_source          'fine-focus sealed tube'
_diffrn_radiation_monochromator   graphite
_diffrn_measurement_device        ?
_diffrn_measurement_method        ?
_diffrn_standards_number          ?
_diffrn_standards_interval_count  ?
_diffrn_standards_interval_time   ?
_diffrn_standards_decay_%         ?
_diffrn_reflns_number             86717
_diffrn_reflns_av_R_equivalents   0.1415
_diffrn_reflns_av_sigmaI/netI     0.1151
_diffrn_reflns_limit_h_min        -21
_diffrn_reflns_limit_h_max        21
_diffrn_reflns_limit_k_min        -24
_diffrn_reflns_limit_k_max        24
_diffrn_reflns_limit_l_min        -35
_diffrn_reflns_limit_l_max        35
_diffrn_reflns_theta_min          2.53
_diffrn_reflns_theta_max          29.00
_reflns_number_total              31613
_reflns_number_observed           24428
_reflns_observed_criterion        >2sigma(I)
 
_computing_data_collection        ?
_computing_cell_refinement        ?
_computing_data_reduction         ?
_computing_structure_solution     'SHELXS-86 (Sheldrick, 1990)'
_computing_structure_refinement   'SHELXL-93 (Sheldrick, 1993)'
_computing_molecular_graphics     ?
_computing_publication_material   ?
 
_refine_special_details
;
  Refinement on F^2^ for ALL reflections except for 75 with very negative F^2^
  or flagged by the user for potential systematic errors.  Weighted R-factors
  wR and all goodnesses of fit S are based on F^2^, conventional R-factors R
  are based on F, with F set to zero for negative F^2^. The observed criterion
  of F^2^ > 2sigma(F^2^) is used only for calculating _R_factor_obs etc. and is
  not relevant to the choice of reflections for refinement.  R-factors based
  on F^2^ are statistically about twice as large as those based on F, and R-
  factors based on ALL data will be even larger.
;
 
_refine_ls_structure_factor_coef  Fsqd
_refine_ls_matrix_type            full
_refine_ls_weighting_scheme
  'calc w=1/[\s^2^(Fo^2^)+(0.1030P)^2^+39.2163P] where P=(Fo^2^+2Fc^2^)/3'
_atom_sites_solution_primary      direct
_atom_sites_solution_secondary    difmap
_atom_sites_solution_hydrogens    geom
_refine_ls_hydrogen_treatment     ?
_refine_ls_extinction_method      SHELXL
_refine_ls_extinction_coef        0.00032(4)
_refine_ls_extinction_expression
  'Fc^*^=kFc[1+0.001xFc^2^\l^3^/sin(2\q)]^-1/4^'
_refine_ls_number_reflns          31538
_refine_ls_number_parameters      1343
_refine_ls_number_restraints      18
_refine_ls_R_factor_all           0.0876
_refine_ls_R_factor_obs           0.0700
_refine_ls_wR_factor_all          0.1967
_refine_ls_wR_factor_obs          0.1781
_refine_ls_goodness_of_fit_all    1.051
_refine_ls_goodness_of_fit_obs    1.090
_refine_ls_restrained_S_all       1.056
_refine_ls_restrained_S_obs       1.090
_refine_ls_shift/esd_max          0.775
_refine_ls_shift/esd_mean         0.018
 
loop_
  _atom_site_label
  _atom_site_type_symbol
  _atom_site_fract_x
  _atom_site_fract_y
  _atom_site_fract_z
  _atom_site_U_iso_or_equiv
  _atom_site_thermal_displace_type
  _atom_site_occupancy
  _atom_site_calc_flag
  _atom_site_refinement_flags
  _atom_site_disorder_group
Pb1 Pb -0.18689(3) 0.80714(3) -0.09947(2) 0.03572(12) Uani 1 d . .
Pb2 Pb -0.26205(3) 0.65353(3) -0.10127(2) 0.03097(11) Uani 1 d . .
Pb3 Pb -0.13127(3) 0.75097(3) -0.20482(2) 0.02751(10) Uani 1 d . .
Pb4 Pb -0.24287(3) 0.93115(3) -0.20926(2) 0.02557(10) Uani 1 d . .
Pb5 Pb -0.37431(3) 0.83294(3) -0.10508(2) 0.02562(10) Uani 1 d . .
Pb6 Pb -0.42912(3) 0.70867(3) -0.15927(2) 0.02394(10) Uani 1 d . .
Pb7 Pb -0.26715(3) 0.65353(2) -0.22729(2) 0.02385(10) Uani 1 d . .
Pb8 Pb -0.24648(3) 0.84171(3) -0.30033(2) 0.02301(10) Uani 1 d . .
Pb9 Pb -0.41700(3) 0.89812(2) -0.22981(2) 0.02194(9) Uani 1 d . .
Mo10 Mo -0.40775(6) 0.77065(6) -0.29033(4) 0.0198(2) Uani 1 d . .
C11 C -0.5241(8) 0.7512(7) -0.2816(5) 0.028(3) Uani 1 d . .
O11 O -0.5957(5) 0.7425(5) -0.2781(4) 0.027(2) Uani 1 d . .
C12 C -0.3737(8) 0.7042(7) -0.3409(4) 0.024(2) Uani 1 d . .
O12 O -0.3518(6) 0.6656(5) -0.3728(3) 0.034(2) Uani 1 d . .
C13 C -0.4296(7) 0.8638(8) -0.3566(5) 0.025(2) Uani 1 d . .
O13 O -0.4417(6) 0.9206(6) -0.3981(4) 0.037(2) Uani 1 d . .
Mo2 Mo 0.00721(6) 0.56671(6) 0.25567(4) 0.0215(2) Uani 1 d . .
C1 C 0.0744(7) 0.6234(7) 0.2871(5) 0.024(2) Uani 1 d . .
O1 O 0.1130(6) 0.6612(7) 0.3053(4) 0.042(2) Uani 1 d . .
C2 C -0.0464(7) 0.6740(8) 0.2179(5) 0.026(2) Uani 1 d . .
O2 O -0.0831(6) 0.7405(6) 0.1965(4) 0.037(2) Uani 1 d . .
C3 C -0.0747(8) 0.5701(7) 0.3174(5) 0.030(2) Uani 1 d . .
O3 O -0.1255(7) 0.5731(7) 0.3554(4) 0.043(2) Uani 1 d . .
N1 N 0.0653(7) 0.4305(6) 0.2983(4) 0.029(2) Uani 1 d . .
H1A H 0.0426(7) 0.3968(6) 0.2830(4) 0.035 Uiso 1 calc R .
H1B H 0.1210(7) 0.4279(6) 0.2864(4) 0.035 Uiso 1 calc R .
C4 C 0.0588(12) 0.3920(10) 0.3609(6) 0.052(4) Uani 1 d . .
H4C H 0.0886(12) 0.3353(10) 0.3702(6) 0.063 Uiso 1 calc R .
H4D H -0.0003(12) 0.3876(10) 0.3748(6) 0.063 Uiso 1 calc R .
C5 C 0.0947(12) 0.4416(10) 0.3901(6) 0.057(5) Uani 1 d . .
H5A H 0.0888(12) 0.4136(10) 0.4316(6) 0.068 Uiso 1 calc R .
H5B H 0.0614(12) 0.4966(10) 0.3829(6) 0.068 Uiso 1 calc R .
N2 N 0.1851(10) 0.4548(10) 0.3727(7) 0.062(4) Uani 1 d . .
H2A H 0.2127(10) 0.4336(10) 0.3468(7) 0.074 Uiso 1 calc R .
H2B H 0.2099(10) 0.4835(10) 0.3884(7) 0.074 Uiso 1 calc R .
N3 N -0.0594(6) 0.4978(6) 0.2109(4) 0.028(2) Uani 1 d . .
H3A H -0.0787(6) 0.4519(6) 0.2375(4) 0.033 Uiso 1 calc R .
H3B H -0.1045(6) 0.5320(6) 0.1947(4) 0.033 Uiso 1 calc R .
C6 C 0.0538(8) 0.5358(9) 0.1366(5) 0.033(3) Uani 1 d . .
H6A H 0.0939(8) 0.5152(9) 0.1094(5) 0.040 Uiso 1 calc R .
H6B H 0.0222(8) 0.5877(9) 0.1151(5) 0.040 Uiso 1 calc R .
C7 C -0.0053(8) 0.4713(8) 0.1666(5) 0.032(3) Uani 1 d . .
H7A H -0.0395(8) 0.4639(8) 0.1387(5) 0.039 Uiso 1 calc R .
H7B H 0.0271(8) 0.4173(8) 0.1840(5) 0.039 Uiso 1 calc R .
N4 N 0.0989(6) 0.5518(6) 0.1797(4) 0.026(2) Uani 1 d . .
H4A H 0.1244(6) 0.5994(6) 0.1636(4) 0.031 Uiso 1 calc R .
H4B H 0.1393(6) 0.5085(6) 0.1923(4) 0.031 Uiso 1 calc R .
K1 K 0.51890(14) 0.68215(14) 0.18800(9) 0.0207(4) Uani 1 d . .
N100 N 0.4877(6) 0.8612(6) 0.1588(4) 0.027(2) Uani 1 d . .
C101 C 0.5325(8) 0.8881(6) 0.1974(5) 0.026(2) Uani 1 d . .
H10A H 0.5033(8) 0.8722(6) 0.2359(5) 0.031 Uiso 1 calc R .
H10B H 0.5299(8) 0.9493(6) 0.1840(5) 0.031 Uiso 1 calc R .
C102 C 0.6216(8) 0.8522(8) 0.2014(6) 0.033(3) Uani 1 d . .
H10C H 0.6507(8) 0.8655(8) 0.1628(6) 0.040 Uiso 1 calc R .
H10D H 0.6485(8) 0.8779(8) 0.2243(6) 0.040 Uiso 1 calc R .
O103 O 0.6293(5) 0.7647(5) 0.2267(4) 0.030(2) Uani 1 d . .
C104 C 0.7131(9) 0.7333(9) 0.2245(7) 0.042(3) Uani 1 d . .
H10E H 0.7448(9) 0.7610(9) 0.2434(7) 0.051 Uiso 1 calc R .
H10F H 0.7361(9) 0.7441(9) 0.1844(7) 0.051 Uiso 1 calc R .
C105 C 0.7208(8) 0.6401(8) 0.2546(6) 0.034(3) Uani 1 d . .
H10G H 0.7800(8) 0.6172(8) 0.2544(6) 0.041 Uiso 1 calc R .
H10H H 0.6976(8) 0.6295(8) 0.2947(6) 0.041 Uiso 1 calc R .
O106 O 0.6772(6) 0.6008(6) 0.2266(4) 0.031(2) Uani 1 d . .
C107 C 0.6838(9) 0.5132(8) 0.2524(6) 0.035(3) Uani 1 d . .
H10I H 0.6588(9) 0.5008(8) 0.2921(6) 0.041 Uiso 1 calc R .
H10J H 0.7432(9) 0.4907(8) 0.2533(6) 0.041 Uiso 1 calc R .
C108 C 0.6412(8) 0.4723(7) 0.2208(5) 0.031(3) Uani 1 d . .
H10K H 0.6485(8) 0.4117(7) 0.2395(5) 0.037 Uiso 1 calc R .
H10L H 0.6683(8) 0.4829(7) 0.1817(5) 0.037 Uiso 1 calc R .
N109 N 0.5507(7) 0.5005(6) 0.2175(4) 0.026(2) Uani 1 d . .
C110 C 0.5071(8) 0.4631(7) 0.2732(5) 0.029(2) Uani 1 d . .
H11A H 0.5382(8) 0.4690(7) 0.3033(5) 0.035 Uiso 1 calc R .
H11B H 0.5075(8) 0.4030(7) 0.2788(5) 0.035 Uiso 1 calc R .
C111 C 0.4182(8) 0.5006(7) 0.2803(5) 0.032(3) Uani 1 d . .
H11C H 0.3860(8) 0.4946(7) 0.2507(5) 0.038 Uiso 1 calc R .
H11D H 0.3923(8) 0.4711(7) 0.3180(5) 0.038 Uiso 1 calc R .
O112 O 0.4168(5) 0.5866(5) 0.2753(3) 0.024(2) Uani 1 d . .
C113 C 0.3354(8) 0.6195(8) 0.2890(5) 0.029(2) Uani 1 d . .
H11E H 0.3154(8) 0.5869(8) 0.3276(5) 0.035 Uiso 1 calc R .
H11F H 0.2978(8) 0.6154(8) 0.2618(5) 0.035 Uiso 1 calc R .
C114 C 0.3340(9) 0.7073(8) 0.2867(5) 0.034(3) Uani 1 d . .
H11G H 0.2761(9) 0.7310(8) 0.2936(5) 0.041 Uiso 1 calc R .
H11H H 0.3666(9) 0.7108(8) 0.3168(5) 0.041 Uiso 1 calc R .
O115 O 0.3687(5) 0.7546(5) 0.2315(3) 0.024(2) Uani 1 d . .
C116 C 0.3560(8) 0.8400(7) 0.2246(5) 0.031(3) Uani 1 d . .
H11I H 0.3807(8) 0.8522(7) 0.2552(5) 0.038 Uiso 1 calc R .
H11J H 0.2957(8) 0.8589(7) 0.2267(5) 0.038 Uiso 1 calc R .
C117 C 0.3963(8) 0.8847(8) 0.1675(5) 0.030(2) Uani 1 d . .
H11K H 0.3688(8) 0.8738(8) 0.1376(5) 0.036 Uiso 1 calc R .
H11L H 0.3864(8) 0.9450(8) 0.1623(5) 0.036 Uiso 1 calc R .
C118 C 0.5173(9) 0.9004(7) 0.0994(5) 0.031(3) Uani 1 d . .
H11M H 0.5788(9) 0.8922(7) 0.0954(5) 0.037 Uiso 1 calc R .
H11N H 0.4996(9) 0.9608(7) 0.0891(5) 0.037 Uiso 1 calc R .
C119 C 0.4832(8) 0.8639(8) 0.0581(5) 0.029(2) Uani 1 d . .
H11O H 0.4217(8) 0.8736(8) 0.0607(5) 0.035 Uiso 1 calc R .
H11P H 0.5043(8) 0.8912(8) 0.0186(5) 0.035 Uiso 1 calc R .
O120 O 0.5091(5) 0.7783(5) 0.0729(3) 0.027(2) Uani 1 d . .
C121 C 0.4786(7) 0.7416(7) 0.0362(5) 0.025(2) Uani 1 d . .
H12A H 0.4906(7) 0.7744(7) -0.0039(5) 0.030 Uiso 1 calc R .
H12B H 0.4177(7) 0.7415(7) 0.0438(5) 0.030 Uiso 1 calc R .
C122 C 0.5177(9) 0.6572(7) 0.0454(5) 0.031(3) Uani 1 d . .
H12C H 0.4952(9) 0.6316(7) 0.0204(5) 0.037 Uiso 1 calc R .
H12D H 0.5783(9) 0.6577(7) 0.0352(5) 0.037 Uiso 1 calc R .
O123 O 0.5032(5) 0.6089(5) 0.1037(3) 0.027(2) Uani 1 d . .
C124 C 0.5420(8) 0.5258(7) 0.1128(5) 0.029(2) Uani 1 d . .
H12E H 0.6029(8) 0.5259(7) 0.1050(5) 0.034 Uiso 1 calc R .
H12F H 0.5220(8) 0.5009(7) 0.0865(5) 0.034 Uiso 1 calc R .
C125 C 0.5215(8) 0.4748(7) 0.1738(5) 0.028(2) Uani 1 d . .
H12G H 0.4604(8) 0.4755(7) 0.1805(5) 0.034 Uiso 1 calc R .
H12H H 0.5451(8) 0.4166(7) 0.1781(5) 0.034 Uiso 1 calc R .
K2 K 0.16153(15) 0.04982(15) 0.61862(10) 0.0237(4) Uani 1 d . .
N200 N 0.2368(7) 0.0205(8) 0.5109(4) 0.036(3) Uani 1 d . .
C201 C 0.3033(10) -0.0508(11) 0.5255(6) 0.048(4) Uani 1 d . .
H20A H 0.3359(10) -0.0551(11) 0.4900(6) 0.057 Uiso 1 calc R .
H20B H 0.2768(10) -0.1026(11) 0.5427(6) 0.057 Uiso 1 calc R .
C202 C 0.3614(8) -0.0437(10) 0.5659(5) 0.037(3) Uani 1 d . .
H20C H 0.4068(8) -0.0899(10) 0.5713(5) 0.044 Uiso 1 calc R .
H20D H 0.3863(8) 0.0092(10) 0.5503(5) 0.044 Uiso 1 calc R .
O203 O 0.3150(5) -0.0465(5) 0.6191(3) 0.028(2) Uani 1 d . .
C204 C 0.3702(8) -0.0422(9) 0.6592(5) 0.034(3) Uani 1 d . .
H20E H 0.3917(8) 0.0126(9) 0.6463(5) 0.040 Uiso 1 calc R .
H20F H 0.4180(8) -0.0854(9) 0.6611(5) 0.040 Uiso 1 calc R .
C205 C 0.3258(8) -0.0543(8) 0.7160(5) 0.033(3) Uani 1 d . .
H20G H 0.3031(8) -0.1085(8) 0.7286(5) 0.039 Uiso 1 calc R .
H20H H 0.3649(8) -0.0547(8) 0.7437(5) 0.039 Uiso 1 calc R .
O206 O 0.2589(6) 0.0115(6) 0.7145(4) 0.032(2) Uani 1 d . .
C207 C 0.2165(9) 0.0035(10) 0.7684(6) 0.042(3) Uani 1 d . .
H20I H 0.2558(9) 0.0057(10) 0.7952(6) 0.051 Uiso 1 calc R .
H20J H 0.1945(9) -0.0509(10) 0.7828(6) 0.051 Uiso 1 calc R .
C208 C 0.1462(9) 0.0713(10) 0.7658(6) 0.042(3) Uani 1 d . .
H20K H 0.1194(9) 0.0645(10) 0.8047(6) 0.051 Uiso 1 calc R .
H20L H 0.1693(9) 0.1252(10) 0.7529(6) 0.051 Uiso 1 calc R .
N209 N 0.0835(6) 0.0737(6) 0.7287(4) 0.027(2) Uani 1 d . .
C210 C 0.0294(9) 0.0098(9) 0.7559(5) 0.036(3) Uani 1 d . .
H21A H -0.0074(9) 0.0267(9) 0.7861(5) 0.043 Uiso 1 calc R .
H21B H 0.0640(9) -0.0419(9) 0.7745(5) 0.043 Uiso 1 calc R .
C211 C -0.0228(9) -0.0082(11) 0.7178(6) 0.043(3) Uani 1 d . .
H21C H -0.0571(9) -0.0527(11) 0.7402(6) 0.052 Uiso 1 calc R .
H21D H -0.0609(9) 0.0420(11) 0.7012(6) 0.052 Uiso 1 calc R .
O212 O 0.0251(5) -0.0333(6) 0.6735(4) 0.028(2) Uani 1 d . .
C213 C -0.0249(9) -0.0576(12) 0.6408(7) 0.048(4) Uani 1 d . .
H21E H -0.0613(9) -0.0088(12) 0.6199(7) 0.058 Uiso 1 calc R .
H21F H -0.0606(9) -0.0987(12) 0.6661(7) 0.058 Uiso 1 calc R .
C214 C 0.0266(10) -0.0937(10) 0.6008(6) 0.044(3) Uani 1 d . .
H21G H 0.0642(10) -0.1415(10) 0.6217(6) 0.053 Uiso 1 calc R .
H21H H -0.0090(10) -0.1141(10) 0.5797(6) 0.053 Uiso 1 calc R .
O215 O 0.0751(6) -0.0328(6) 0.5612(4) 0.037(2) Uani 1 d . .
C216 C 0.1209(10) -0.0623(11) 0.5185(6) 0.045(4) Uani 1 d . .
H21I H 0.0825(10) -0.0759(11) 0.4956(6) 0.054 Uiso 1 calc R .
H21J H 0.1571(10) -0.1136(11) 0.5361(6) 0.054 Uiso 1 calc R .
C217 C 0.1730(9) 0.0021(11) 0.4809(6) 0.045(4) Uani 1 d . .
H21K H 0.2005(9) -0.0172(11) 0.4488(6) 0.054 Uiso 1 calc R .
H21L H 0.1365(9) 0.0538(11) 0.4649(6) 0.054 Uiso 1 calc R .
C218 C 0.2730(9) 0.0944(11) 0.4747(5) 0.042(3) Uani 1 d . .
H21M H 0.2881(9) 0.0885(11) 0.4362(5) 0.051 Uiso 1 calc R .
H21N H 0.3247(9) 0.0986(11) 0.4903(5) 0.051 Uiso 1 calc R .
C219 C 0.2166(10) 0.1721(10) 0.4699(6) 0.045(3) Uani 1 d . .
H21O H 0.2422(10) 0.2195(10) 0.4423(6) 0.054 Uiso 1 calc R .
H21P H 0.1635(10) 0.1679(10) 0.4561(6) 0.054 Uiso 1 calc R .
O220 O 0.2011(6) 0.1856(6) 0.5252(4) 0.037(2) Uani 1 d . .
C221 C 0.1532(12) 0.2612(10) 0.5222(7) 0.054(4) Uani 1 d . .
H22A H 0.0994(12) 0.2621(10) 0.5072(7) 0.065 Uiso 1 calc R .
H22B H 0.1824(12) 0.3070(10) 0.4957(7) 0.065 Uiso 1 calc R .
C222 C 0.1384(12) 0.2732(9) 0.5781(7) 0.055(4) Uani 1 d . .
H22C H 0.1924(12) 0.2753(9) 0.5918(7) 0.066 Uiso 1 calc R .
H22D H 0.1047(12) 0.3273(9) 0.5749(7) 0.066 Uiso 1 calc R .
O223 O 0.0971(6) 0.2101(6) 0.6186(4) 0.040(2) Uani 1 d . .
C224 C 0.0805(11) 0.2245(9) 0.6728(7) 0.049(4) Uani 1 d . .
H22E H 0.0467(11) 0.2788(9) 0.6686(7) 0.059 Uiso 1 calc R .
H22F H 0.1334(11) 0.2261(9) 0.6879(7) 0.059 Uiso 1 calc R .
C225 C 0.0336(9) 0.1555(9) 0.7144(6) 0.038(3) Uani 1 d . .
H22G H 0.0157(9) 0.1704(9) 0.7498(6) 0.045 Uiso 1 calc R .
H22H H -0.0169(9) 0.1516(9) 0.6974(6) 0.045 Uiso 1 calc R .
K3 K 0.2071(2) 0.7864(2) 0.00688(10) 0.0254(5) Uani 1 d . .
N300 N 0.2786(7) 0.7095(7) -0.0847(4) 0.029(2) Uani 1 d . .
C301 C 0.3119(9) 0.7742(8) -0.1347(5) 0.034(3) Uani 1 d . .
H30A H 0.2652(9) 0.8068(8) -0.1568(5) 0.041 Uiso 1 calc R .
H30B H 0.3494(9) 0.7469(8) -0.1596(5) 0.041 Uiso 1 calc R .
C302 C 0.3585(8) 0.8320(8) -0.1185(5) 0.030(2) Uani 1 d . .
H30C H 0.4033(8) 0.7999(8) -0.0944(5) 0.036 Uiso 1 calc R .
H30D H 0.3842(8) 0.8702(8) -0.1531(5) 0.036 Uiso 1 calc R .
O303 O 0.3025(5) 0.8781(5) -0.0883(4) 0.029(2) Uani 1 d . .
C304 C 0.3415(9) 0.9391(8) -0.0766(5) 0.036(3) Uani 1 d . .
H30E H 0.3647(9) 0.9762(8) -0.1127(5) 0.043 Uiso 1 calc R .
H30F H 0.3880(9) 0.9118(8) -0.0527(5) 0.043 Uiso 1 calc R .
C305 C 0.2824(11) 0.9885(8) -0.0469(6) 0.045(4) Uani 1 d . .
H30G H 0.3083(11) 1.0359(8) -0.0440(6) 0.054 Uiso 1 calc R .
H30H H 0.2323(11) 1.0105(8) -0.0681(6) 0.054 Uiso 1 calc R .
O306 O 0.2601(6) 0.9359(5) 0.0086(4) 0.036(2) Uani 1 d . .
C307 C 0.2100(12) 0.9825(9) 0.0428(7) 0.054(5) Uani 1 d . .
H30I H 0.1594(12) 1.0112(9) 0.0236(7) 0.065 Uiso 1 calc R .
H30J H 0.2418(12) 1.0251(9) 0.0472(7) 0.065 Uiso 1 calc R .
C308 C 0.1862(9) 0.9262(10) 0.0992(6) 0.040(3) Uani 1 d . .
H30K H 0.1574(9) 0.9597(10) 0.1235(6) 0.048 Uiso 1 calc R .
H30L H 0.2373(9) 0.8961(10) 0.1171(6) 0.048 Uiso 1 calc R .
N309 N 0.1310(6) 0.8643(7) 0.0977(4) 0.027(2) Uani 1 d . .
C310 C 0.1303(8) 0.8004(7) 0.1521(5) 0.027(2) Uani 1 d . .
H31A H 0.0816(8) 0.7700(7) 0.1560(5) 0.032 Uiso 1 calc R .
H31B H 0.1224(8) 0.8277(7) 0.1825(5) 0.032 Uiso 1 calc R .
C311 C 0.2068(8) 0.7383(9) 0.1621(5) 0.034(3) Uani 1 d . .
H31C H 0.2565(8) 0.7676(9) 0.1576(5) 0.041 Uiso 1 calc R .
H31D H 0.2021(8) 0.7003(9) 0.2014(5) 0.041 Uiso 1 calc R .
O312 O 0.2161(5) 0.6911(5) 0.1221(3) 0.027(2) Uani 1 d . .
C313 C 0.2875(8) 0.6317(8) 0.1324(5) 0.031(3) Uani 1 d . .
H31E H 0.2825(8) 0.5948(8) 0.1721(5) 0.037 Uiso 1 calc R .
H31F H 0.3378(8) 0.6604(8) 0.1274(5) 0.037 Uiso 1 calc R .
C314 C 0.2958(8) 0.5808(7) 0.0915(5) 0.028(2) Uani 1 d U .
H31G H 0.3427(8) 0.5364(7) 0.1004(5) 0.033 Uiso 1 calc R .
H31H H 0.2442(8) 0.5548(7) 0.0945(5) 0.033 Uiso 1 calc R .
O315 O 0.3104(5) 0.6362(5) 0.0349(3) 0.028(2) Uani 1 d . .
C316 C 0.3261(10) 0.5859(8) -0.0036(5) 0.036(3) Uani 1 d . .
H31I H 0.2767(10) 0.5583(8) -0.0033(5) 0.043 Uiso 1 calc R .
H31J H 0.3737(10) 0.5429(8) 0.0075(5) 0.043 Uiso 1 calc R .
C317 C 0.3456(9) 0.6458(7) -0.0622(5) 0.032(3) Uani 1 d . .
H31K H 0.3941(9) 0.6735(7) -0.0605(5) 0.039 Uiso 1 calc R .
H31P H 0.3620(9) 0.6132(7) -0.0893(5) 0.039 Uiso 1 calc R .
C318 C 0.2133(10) 0.6725(11) -0.0999(6) 0.047(4) Uani 1 d . .
H31L H 0.2034(10) 0.6203(11) -0.0696(6) 0.057 Uiso 1 calc R .
H31M H 0.2322(10) 0.6584(11) -0.1355(6) 0.057 Uiso 1 calc R .
C319 C 0.1330(10) 0.7286(14) -0.1081(7) 0.061(5) Uani 1 d . .
H31N H 0.1422(10) 0.7821(14) -0.1372(7) 0.073 Uiso 1 calc R .
H31O H 0.0919(10) 0.7026(14) -0.1211(7) 0.073 Uiso 1 calc R .
O320 O 0.1038(7) 0.7416(12) -0.0568(6) 0.090(6) Uani 1 d . .
C321 C 0.0322(19) 0.7805(20) -0.0618(12) 0.107(8) Uani 1 d U .
H32A H -0.0012(19) 0.7487(20) -0.0764(12) 0.129 Uiso 1 calc R .
H32H H 0.0376(19) 0.8340(20) -0.0919(12) 0.129 Uiso 1 calc R .
C322 C -0.0202(19) 0.8006(20) -0.0098(12) 0.111(9) Uani 1 d U .
H32B H -0.0335(19) 0.7491(20) 0.0201(12) 0.134 Uiso 1 calc R .
H32C H -0.0726(19) 0.8358(20) -0.0214(12) 0.134 Uiso 1 calc R .
O323 O 0.0385(7) 0.8485(11) 0.0119(5) 0.077(5) Uani 1 d . .
C324 C -0.0030(9) 0.8507(13) 0.0664(6) 0.055(5) Uani 1 d . .
H32D H -0.0026(9) 0.7941(13) 0.0936(6) 0.066 Uiso 1 calc R .
H32E H -0.0613(9) 0.8762(13) 0.0624(6) 0.066 Uiso 1 calc R .
C325 C 0.0492(10) 0.9050(12) 0.0866(6) 0.051(4) Uani 1 d . .
H32F H 0.0529(10) 0.9590(12) 0.0568(6) 0.062 Uiso 1 calc R .
H32G H 0.0208(10) 0.9159(12) 0.1215(6) 0.062 Uiso 1 calc R .
K4 K 0.3747(2) -0.2934(2) 0.45802(10) 0.0299(5) Uani 1 d . .
N400 N 0.5409(8) -0.2307(7) 0.4190(4) 0.033(2) Uani 1 d . .
C401 C 0.5341(10) -0.1730(8) 0.3608(5) 0.037(3) Uani 1 d . .
H40A H 0.5856(10) -0.1456(8) 0.3488(5) 0.045 Uiso 1 calc R .
H40B H 0.5308(10) -0.2059(8) 0.3347(5) 0.045 Uiso 1 calc R .
C402 C 0.4629(9) -0.1087(8) 0.3538(6) 0.036(3) Uani 1 d . .
H40C H 0.4642(9) -0.0754(8) 0.3799(6) 0.043 Uiso 1 calc R .
H40D H 0.4652(9) -0.0711(8) 0.3143(6) 0.043 Uiso 1 calc R .
O403 O 0.3871(6) -0.1485(6) 0.3665(4) 0.037(2) Uani 1 d . .
C404 C 0.3158(9) -0.0902(9) 0.3645(6) 0.037(3) Uani 1 d . .
H40E H 0.3211(9) -0.0433(9) 0.3293(6) 0.045 Uiso 1 calc R .
H40F H 0.3125(9) -0.0681(9) 0.3972(6) 0.045 Uiso 1 calc R .
C405 C 0.2381(9) -0.1267(8) 0.3660(5) 0.034(3) Uani 1 d . .
H40G H 0.1901(9) -0.0832(8) 0.3622(5) 0.040 Uiso 1 calc R .
H40H H 0.2411(9) -0.1504(8) 0.3341(5) 0.040 Uiso 1 calc R .
O406 O 0.2279(7) -0.1907(6) 0.4193(4) 0.041(2) Uani 1 d . .
C407 C 0.1572(11) -0.2300(11) 0.4216(6) 0.048(4) Uani 1 d . .
H40I H 0.1653(11) -0.2603(11) 0.3929(6) 0.058 Uiso 1 calc R .
H40J H 0.1083(11) -0.1880(11) 0.4128(6) 0.058 Uiso 1 calc R .
C408 C 0.1418(11) -0.2911(11) 0.4811(7) 0.052(4) Uani 1 d . .
H40K H 0.1348(11) -0.2606(11) 0.5097(7) 0.063 Uiso 1 calc R .
H40L H 0.0896(11) -0.3155(11) 0.4831(7) 0.063 Uiso 1 calc R .
N409 N 0.2093(8) -0.3570(8) 0.4949(5) 0.040(3) Uani 1 d . .
C410 C 0.2049(12) -0.3982(11) 0.5582(7) 0.052(4) Uani 1 d . .
H41A H 0.1465(12) -0.4062(11) 0.5725(7) 0.062 Uiso 1 calc R .
H41B H 0.2374(12) -0.4536(11) 0.5662(7) 0.062 Uiso 1 calc R .
C411 C 0.2376(11) -0.3488(11) 0.5893(6) 0.050(4) Uani 1 d . .
H41C H 0.2084(11) -0.2918(11) 0.5790(6) 0.061 Uiso 1 calc R .
H41D H 0.2268(11) -0.3744(11) 0.6307(6) 0.061 Uiso 1 calc R .
O412 O 0.3242(6) -0.3453(6) 0.5754(4) 0.036(2) Uani 1 d . .
C413 C 0.3586(9) -0.2993(9) 0.6053(5) 0.035(3) Uani 1 d . .
H41E H 0.3303(9) -0.2419(9) 0.5958(5) 0.042 Uiso 1 calc R .
H41F H 0.3485(9) -0.3253(9) 0.6468(5) 0.042 Uiso 1 calc R .
C414 C 0.4455(10) -0.2969(9) 0.5908(5) 0.043(3) Uani 1 d . .
H41G H 0.4689(10) -0.2716(9) 0.6155(5) 0.051 Uiso 1 calc R .
H41P H 0.4735(10) -0.3540(9) 0.5967(5) 0.051 Uiso 1 calc R .
O415 O 0.4597(6) -0.2496(6) 0.5329(3) 0.035(2) Uani 1 d . .
C416 C 0.5445(11) -0.2349(10) 0.5194(6) 0.048(4) Uani 1 d . .
H41H H 0.5804(11) -0.2885(10) 0.5273(6) 0.058 Uiso 1 calc R .
H41I H 0.5597(11) -0.2035(10) 0.5434(6) 0.058 Uiso 1 calc R .
C417 C 0.5584(10) -0.1864(9) 0.4576(5) 0.040(3) Uani 1 d . .
H41J H 0.5222(10) -0.1330(9) 0.4502(5) 0.048 Uiso 1 calc R .
H41K H 0.6168(10) -0.1739(9) 0.4494(5) 0.048 Uiso 1 calc R .
C418 C 0.6061(10) -0.2986(10) 0.4174(6) 0.043(3) Uani 1 d . .
H41L H 0.6226(10) -0.3268(10) 0.4564(6) 0.052 Uiso 1 calc R .
H41M H 0.6553(10) -0.2751(10) 0.3939(6) 0.052 Uiso 1 calc R .
C419 C 0.5801(10) -0.3620(10) 0.3937(5) 0.044(4) Uani 1 d . .
H41N H 0.5669(10) -0.3350(10) 0.3537(5) 0.053 Uiso 1 calc R .
H41O H 0.6267(10) -0.4061(10) 0.3939(5) 0.053 Uiso 1 calc R .
O420 O 0.5106(6) -0.3974(5) 0.4256(3) 0.032(2) Uani 1 d . .
C421 C 0.4886(10) -0.4613(9) 0.4048(6) 0.047(4) Uani 1 d . .
H42A H 0.5368(10) -0.5038(9) 0.4052(6) 0.056 Uiso 1 calc R .
H42B H 0.4735(10) -0.4367(9) 0.3651(6) 0.056 Uiso 1 calc R .
C422 C 0.4188(9) -0.4999(8) 0.4404(6) 0.039(3) Uani 1 d . .
H42C H 0.4066(9) -0.5455(8) 0.4271(6) 0.047 Uiso 1 calc R .
H42D H 0.4342(9) -0.5241(8) 0.4801(6) 0.047 Uiso 1 calc R .
O423 O 0.3456(6) -0.4420(6) 0.4393(4) 0.040(2) Uani 1 d . .
C424 C 0.2757(11) -0.4825(11) 0.4674(7) 0.051(4) Uani 1 d . .
H42E H 0.2867(11) -0.5141(11) 0.5072(7) 0.061 Uiso 1 calc R .
H42F H 0.2645(11) -0.5220(11) 0.4480(7) 0.061 Uiso 1 calc R .
C425 C 0.2012(10) -0.4181(10) 0.4668(7) 0.048(4) Uani 1 d . .
H42G H 0.1904(10) -0.3886(10) 0.4267(7) 0.058 Uiso 1 calc R .
H42H H 0.1521(10) -0.4472(10) 0.4851(7) 0.058 Uiso 1 calc R .
N500 N -0.2081(9) 0.2004(9) 0.3200(5) 0.050(3) Uani 1 d . .
H50A H -0.2172(9) 0.2387(9) 0.3376(5) 0.059 Uiso 1 calc R .
H50B H -0.2284(9) 0.1526(9) 0.3355(5) 0.059 Uiso 1 calc R .
C501 C -0.1599(9) 0.2160(8) 0.2658(5) 0.035(3) Uani 1 d . .
H50C H -0.1938(9) 0.2116(8) 0.2366(5) 0.042 Uiso 1 calc R .
H50D H -0.1105(9) 0.1743(8) 0.2684(5) 0.042 Uiso 1 calc R .
C502 C -0.1329(11) 0.3022(8) 0.2491(6) 0.045(4) Uani 1 d . .
H50E H -0.1039(11) 0.3141(8) 0.2104(6) 0.054 Uiso 1 calc R .
H50F H -0.1831(11) 0.3428(8) 0.2471(6) 0.054 Uiso 1 calc R .
N503 N -0.0794(8) 0.3150(8) 0.2865(5) 0.040(3) Uani 1 d . .
H50G H -0.0646(8) 0.2742(8) 0.3166(5) 0.048 Uiso 1 calc R .
H50H H -0.0613(8) 0.3637(8) 0.2793(5) 0.048 Uiso 1 calc R .
N510 N -0.1800(11) 0.5815(12) 0.1207(8) 0.081(6) Uani 1 d . .
H51A H -0.2220(11) 0.5524(12) 0.1251(8) 0.097 Uiso 1 calc R .
H51B H -0.1323(11) 0.5570(12) 0.1341(8) 0.097 Uiso 1 calc R .
C511 C -0.1892(12) 0.6674(14) 0.0922(9) 0.064(5) Uani 1 d . .
H51C H -0.1476(12) 0.6794(14) 0.0590(9) 0.077 Uiso 1 calc R .
H51D H -0.1777(12) 0.6976(14) 0.1181(9) 0.077 Uiso 1 calc R .
C512 C -0.2741(13) 0.6988(20) 0.0722(9) 0.093(9) Uani 1 d . .
H51E H -0.3165(13) 0.6785(20) 0.1038(9) 0.112 Uiso 1 calc R .
H51F H -0.2819(13) 0.6770(20) 0.0408(9) 0.112 Uiso 1 calc R .
N513 N -0.2860(11) 0.7930(11) 0.0517(8) 0.070(5) Uani 1 d . .
H51G H -0.2454(11) 0.8212(11) 0.0527(8) 0.083 Uiso 1 calc R .
H51H H -0.3334(11) 0.8193(11) 0.0388(8) 0.083 Uiso 1 calc R .
N520 N -0.1127(14) 0.5070(14) 0.0116(9) 0.095(6) Uani 1 d . .
H52A H -0.1176(14) 0.4537(14) 0.0264(9) 0.114 Uiso 1 calc R .
H52B H -0.1574(14) 0.5433(14) 0.0071(9) 0.114 Uiso 1 calc R .
C521 C -0.0274(18) 0.5362(16) -0.0064(10) 0.094(9) Uani 1 d . .
H52C H -0.0220(18) 0.5660(16) -0.0477(10) 0.113 Uiso 1 calc R .
H52D H -0.0169(18) 0.5735(16) 0.0149(10) 0.113 Uiso 1 calc R .
 
loop_
  _atom_site_aniso_label
  _atom_site_aniso_U_11
  _atom_site_aniso_U_22
  _atom_site_aniso_U_33
  _atom_site_aniso_U_23
  _atom_site_aniso_U_13
  _atom_site_aniso_U_12
Pb1 0.0325(3) 0.0461(3) 0.0342(2) -0.0166(2) -0.0133(2) -0.0032(2)
Pb2 0.0423(3) 0.0219(2) 0.0239(2) 0.0020(2) -0.0103(2) -0.0015(2)
Pb3 0.0208(2) 0.0272(2) 0.0328(2) -0.0080(2) -0.0031(2) 0.0014(2)
Pb4 0.0270(2) 0.0185(2) 0.0309(2) -0.0063(2) 0.0011(2) -0.00676(15)
Pb5 0.0286(2) 0.0287(2) 0.0198(2) -0.0083(2) 0.00172(15) -0.0049(2)
Pb6 0.0262(2) 0.0228(2) 0.0217(2) -0.0037(2) 0.00215(14) -0.00900(15)
Pb7 0.0276(2) 0.0164(2) 0.0263(2) -0.0058(2) -0.00451(15) 0.00226(14)
Pb8 0.0243(2) 0.0229(2) 0.0187(2) -0.0019(2) 0.00209(14) -0.00547(14)
Pb9 0.0238(2) 0.0164(2) 0.0232(2) -0.0039(2) -0.00324(14) 0.00192(14)
Mo10 0.0198(5) 0.0190(4) 0.0201(4) -0.0043(3) -0.0037(3) -0.0025(3)
C11 0.044(8) 0.025(6) 0.019(5) -0.011(5) 0.002(4) -0.004(5)
O11 0.018(5) 0.029(4) 0.035(4) -0.009(4) 0.003(3) -0.008(3)
C12 0.034(6) 0.023(5) 0.011(4) 0.003(4) -0.001(4) -0.005(4)
O12 0.049(6) 0.025(4) 0.022(4) -0.005(3) -0.001(4) 0.004(4)
C13 0.017(6) 0.034(6) 0.026(5) -0.012(5) -0.002(4) -0.003(4)
O13 0.046(6) 0.027(5) 0.025(4) 0.008(4) -0.004(4) 0.002(4)
Mo2 0.0222(5) 0.0188(4) 0.0209(4) -0.0025(3) -0.0013(3) -0.0020(3)
C1 0.012(5) 0.036(6) 0.030(5) -0.015(5) -0.006(4) -0.002(4)
O1 0.043(6) 0.048(6) 0.042(5) -0.024(5) 0.001(4) -0.008(4)
C2 0.020(6) 0.031(6) 0.026(5) -0.007(5) 0.004(4) -0.010(4)
O2 0.039(6) 0.027(5) 0.040(5) -0.005(4) -0.005(4) 0.000(4)
C3 0.041(7) 0.021(5) 0.027(6) 0.001(5) -0.005(5) -0.011(5)
O3 0.046(6) 0.051(6) 0.033(5) -0.016(5) 0.015(4) -0.011(5)
N1 0.029(6) 0.025(5) 0.032(5) -0.004(4) -0.005(4) -0.005(4)
C4 0.069(11) 0.035(8) 0.029(7) 0.018(6) 0.008(7) 0.001(7)
C5 0.096(14) 0.039(8) 0.022(6) -0.002(6) -0.014(7) 0.029(9)
N2 0.062(10) 0.068(10) 0.069(10) -0.038(9) -0.035(8) 0.013(7)
N3 0.026(5) 0.027(5) 0.027(5) 0.000(4) -0.003(4) -0.009(4)
C6 0.033(7) 0.043(8) 0.025(6) -0.013(6) -0.005(5) 0.002(5)
C7 0.035(7) 0.026(6) 0.039(7) -0.015(5) -0.007(5) 0.000(5)
N4 0.030(6) 0.021(5) 0.027(5) -0.006(4) -0.006(4) 0.002(4)
K1 0.0223(12) 0.0170(10) 0.0220(10) -0.0032(8) -0.0034(8) -0.0037(8)
N100 0.025(5) 0.031(5) 0.030(5) -0.015(4) -0.004(4) -0.003(4)
C101 0.047(7) 0.005(4) 0.028(5) -0.001(4) -0.009(5) -0.010(4)
C102 0.031(7) 0.032(7) 0.042(7) -0.016(6) -0.003(5) -0.006(5)
O103 0.016(4) 0.032(5) 0.045(5) -0.012(4) -0.007(3) -0.005(3)
C104 0.029(8) 0.037(8) 0.063(9) -0.016(7) -0.003(6) -0.008(5)
C105 0.024(7) 0.035(7) 0.042(7) -0.008(6) -0.006(5) 0.001(5)
O106 0.033(5) 0.029(5) 0.030(4) -0.004(4) -0.008(3) -0.004(3)
C107 0.043(8) 0.020(6) 0.034(6) 0.000(5) -0.008(5) 0.004(5)
C108 0.036(7) 0.017(5) 0.032(6) -0.003(5) 0.002(5) 0.006(4)
N109 0.041(6) 0.011(4) 0.023(4) -0.001(3) -0.005(4) 0.001(4)
C110 0.035(7) 0.021(6) 0.027(6) -0.003(5) 0.002(5) -0.005(4)
C111 0.040(7) 0.021(6) 0.033(6) -0.005(5) -0.002(5) -0.007(5)
O112 0.029(4) 0.015(4) 0.024(4) 0.000(3) -0.002(3) 0.001(3)
C113 0.027(6) 0.036(7) 0.019(5) -0.003(5) 0.004(4) -0.004(5)
C114 0.039(8) 0.038(7) 0.017(5) -0.003(5) 0.008(4) -0.001(5)
O115 0.026(4) 0.019(4) 0.022(4) -0.005(3) 0.005(3) 0.000(3)
C116 0.039(7) 0.020(6) 0.025(5) 0.002(5) 0.001(5) 0.008(5)
C117 0.034(7) 0.028(6) 0.026(6) -0.008(5) 0.002(4) 0.003(5)
C118 0.047(8) 0.012(5) 0.024(5) 0.008(4) 0.002(5) -0.003(4)
C119 0.033(7) 0.032(6) 0.021(5) -0.004(5) 0.002(4) -0.010(5)
O120 0.034(5) 0.023(4) 0.024(4) -0.005(3) -0.006(3) -0.002(3)
C121 0.022(6) 0.029(6) 0.021(5) -0.002(4) 0.001(4) -0.012(4)
C122 0.048(8) 0.020(5) 0.016(5) 0.004(4) -0.002(4) 0.001(5)
O123 0.039(5) 0.021(4) 0.019(4) -0.005(3) -0.001(3) -0.004(3)
C124 0.039(7) 0.023(6) 0.022(5) -0.005(5) 0.000(4) -0.008(5)
C125 0.037(7) 0.020(5) 0.025(5) -0.002(4) -0.009(4) -0.002(4)
K2 0.0228(12) 0.0227(11) 0.0232(10) -0.0043(9) -0.0005(8) -0.0016(8)
N200 0.026(6) 0.056(8) 0.030(5) -0.018(5) -0.004(4) -0.002(5)
C201 0.053(10) 0.052(9) 0.032(7) -0.014(7) -0.008(6) 0.021(7)
C202 0.025(7) 0.055(9) 0.033(6) -0.021(6) -0.003(5) 0.004(5)
O203 0.023(4) 0.034(5) 0.028(4) -0.009(4) -0.010(3) 0.003(3)
C204 0.025(7) 0.043(8) 0.028(6) 0.001(5) -0.011(5) -0.008(5)
C205 0.025(7) 0.037(7) 0.033(6) -0.008(6) -0.010(5) 0.003(5)
O206 0.027(5) 0.038(5) 0.034(4) -0.013(4) -0.002(3) -0.003(3)
C207 0.036(8) 0.061(10) 0.036(7) -0.021(7) -0.013(6) -0.004(6)
C208 0.041(9) 0.063(10) 0.033(7) -0.028(7) 0.002(5) -0.009(6)
N209 0.023(5) 0.033(5) 0.025(5) -0.011(4) -0.001(3) 0.001(4)
C210 0.038(8) 0.039(7) 0.026(6) -0.003(5) 0.015(5) -0.017(5)
C211 0.023(8) 0.069(11) 0.043(8) -0.023(8) 0.008(5) -0.018(6)
O212 0.012(4) 0.039(5) 0.034(4) -0.009(4) 0.006(3) -0.016(3)
C213 0.031(9) 0.077(12) 0.047(8) -0.026(9) -0.004(6) -0.017(7)
C214 0.042(9) 0.053(10) 0.038(7) -0.011(7) -0.008(6) -0.011(7)
O215 0.038(6) 0.039(5) 0.036(5) -0.015(4) -0.008(4) -0.001(4)
C216 0.037(9) 0.065(11) 0.036(7) -0.017(7) -0.011(6) -0.006(7)
C217 0.039(9) 0.073(11) 0.027(6) -0.023(7) -0.011(5) 0.006(7)
C218 0.028(8) 0.069(11) 0.024(6) -0.005(7) 0.007(5) -0.015(6)
C219 0.053(10) 0.040(8) 0.025(6) 0.012(6) -0.009(6) 0.001(6)
O220 0.030(5) 0.036(5) 0.036(5) -0.001(4) 0.000(4) -0.002(4)
C221 0.067(12) 0.032(8) 0.053(9) -0.002(7) -0.011(8) 0.008(7)
C222 0.079(12) 0.015(6) 0.049(9) 0.018(6) -0.015(8) 0.008(7)
O223 0.048(6) 0.025(5) 0.040(5) -0.005(4) -0.001(4) 0.010(4)
C224 0.070(11) 0.030(7) 0.048(8) -0.019(7) 0.003(7) 0.003(7)
C225 0.028(7) 0.043(8) 0.039(7) -0.015(6) 0.005(5) 0.001(5)
K3 0.0276(13) 0.0268(12) 0.0196(10) -0.0035(9) -0.0017(8) -0.0047(9)
N300 0.034(6) 0.030(5) 0.023(5) -0.007(4) -0.003(4) -0.006(4)
C301 0.055(9) 0.027(6) 0.016(5) -0.001(5) 0.000(5) -0.008(5)
C302 0.023(6) 0.037(7) 0.024(5) 0.001(5) -0.001(4) -0.006(5)
O303 0.023(5) 0.029(4) 0.032(4) -0.006(4) 0.005(3) -0.007(3)
C304 0.050(9) 0.021(6) 0.032(6) 0.002(5) 0.002(5) -0.019(5)
C305 0.068(11) 0.023(6) 0.039(7) -0.002(6) 0.019(7) -0.027(6)
O306 0.059(6) 0.017(4) 0.031(4) -0.005(4) 0.013(4) -0.016(4)
C307 0.086(13) 0.023(7) 0.049(9) -0.009(6) 0.019(8) -0.008(7)
C308 0.027(7) 0.059(10) 0.044(7) -0.029(7) -0.005(5) -0.009(6)
N309 0.008(5) 0.037(6) 0.034(5) -0.008(5) -0.002(3) -0.003(3)
C310 0.030(6) 0.021(5) 0.023(5) -0.002(4) -0.003(4) 0.005(4)
C311 0.033(7) 0.041(8) 0.031(6) -0.015(6) -0.006(5) 0.002(5)
O312 0.029(5) 0.030(4) 0.020(4) -0.004(3) 0.000(3) -0.006(3)
C313 0.023(6) 0.042(7) 0.016(5) 0.002(5) -0.002(4) 0.011(5)
C314 0.031(5) 0.021(4) 0.025(4) 0.003(3) 0.003(3) -0.011(3)
O315 0.032(5) 0.027(4) 0.020(4) -0.006(3) 0.008(3) -0.004(3)
C316 0.057(9) 0.019(6) 0.025(6) -0.003(5) 0.002(5) 0.003(5)
C317 0.046(8) 0.017(5) 0.025(5) 0.001(4) 0.004(5) 0.001(5)
C318 0.041(9) 0.073(11) 0.041(8) -0.025(8) -0.004(6) -0.031(7)
C319 0.035(10) 0.122(17) 0.050(9) -0.052(11) 0.001(6) -0.036(9)
O320 0.006(6) 0.219(19) 0.084(9) -0.095(12) 0.012(5) -0.036(7)
C321 0.107(10) 0.115(10) 0.103(9) -0.039(6) -0.012(6) -0.009(6)
C322 0.110(10) 0.123(10) 0.107(10) -0.042(6) -0.011(6) -0.013(6)
O323 0.019(6) 0.184(16) 0.039(6) -0.056(8) -0.013(4) 0.018(7)
C324 0.023(8) 0.117(16) 0.033(7) -0.037(9) -0.008(5) -0.001(7)
C325 0.032(9) 0.087(13) 0.036(7) -0.023(8) -0.011(6) 0.008(7)
K4 0.042(2) 0.0226(12) 0.0220(11) -0.0024(9) -0.0074(10) -0.0007(10)
N400 0.050(7) 0.025(5) 0.022(5) -0.004(4) -0.005(4) -0.006(4)
C401 0.064(10) 0.025(6) 0.018(5) 0.001(5) -0.007(5) -0.005(6)
C402 0.044(8) 0.033(7) 0.032(6) -0.010(6) -0.006(5) -0.002(5)
O403 0.051(6) 0.027(5) 0.029(4) -0.009(4) -0.007(4) 0.014(4)
C404 0.036(8) 0.034(7) 0.034(6) -0.002(6) -0.011(5) 0.007(5)
C405 0.048(8) 0.022(6) 0.018(5) 0.006(4) -0.006(5) 0.014(5)
O406 0.056(7) 0.035(5) 0.025(4) 0.001(4) -0.006(4) 0.002(4)
C407 0.052(10) 0.053(10) 0.031(7) 0.000(7) -0.017(6) 0.004(7)
C408 0.039(10) 0.058(11) 0.049(9) -0.002(8) 0.006(7) -0.015(7)
N409 0.048(8) 0.034(6) 0.030(5) 0.002(5) -0.008(5) -0.003(5)
C410 0.064(12) 0.045(9) 0.041(8) 0.003(7) -0.008(7) -0.020(8)
C411 0.063(11) 0.046(9) 0.035(7) 0.000(7) -0.003(7) -0.011(7)
O412 0.046(6) 0.035(5) 0.023(4) -0.002(4) -0.001(4) -0.005(4)
C413 0.044(8) 0.039(7) 0.021(5) -0.007(5) -0.005(5) -0.005(6)
C414 0.068(10) 0.040(8) 0.022(6) -0.015(6) -0.003(6) -0.004(7)
O415 0.045(6) 0.037(5) 0.019(4) -0.002(4) -0.006(3) -0.007(4)
C416 0.074(12) 0.039(8) 0.033(7) -0.008(6) -0.007(7) -0.012(7)
C417 0.054(9) 0.039(8) 0.026(6) -0.004(6) -0.004(5) -0.018(6)
C418 0.044(9) 0.042(8) 0.040(7) -0.005(6) -0.009(6) -0.006(6)
C419 0.054(9) 0.048(9) 0.023(6) -0.012(6) -0.003(6) 0.017(7)
O420 0.047(6) 0.026(4) 0.024(4) -0.009(4) -0.012(4) 0.005(4)
C421 0.066(11) 0.039(8) 0.048(8) -0.026(7) -0.035(7) 0.005(7)
C422 0.041(8) 0.032(7) 0.050(8) -0.016(6) -0.019(6) -0.006(5)
O423 0.043(6) 0.041(6) 0.038(5) -0.014(4) -0.013(4) 0.003(4)
C424 0.064(12) 0.048(9) 0.045(8) -0.009(7) -0.026(8) -0.011(8)
C425 0.044(10) 0.039(8) 0.057(9) 0.001(7) -0.014(7) -0.017(6)
N500 0.066(10) 0.051(8) 0.035(6) -0.016(6) 0.014(6) -0.030(7)
C501 0.041(8) 0.032(7) 0.035(6) -0.008(5) -0.010(5) -0.015(5)
C502 0.072(11) 0.023(6) 0.041(7) 0.002(6) -0.019(7) -0.016(6)
N503 0.048(8) 0.043(7) 0.031(5) -0.009(5) 0.007(5) -0.023(5)
N510 0.047(10) 0.070(12) 0.094(13) 0.017(10) -0.019(8) 0.014(8)
C511 0.050(12) 0.080(15) 0.067(12) -0.028(11) -0.008(8) -0.003(9)
C512 0.038(12) 0.197(32) 0.069(13) -0.074(18) 0.013(9) -0.030(13)
N513 0.059(11) 0.072(12) 0.091(13) -0.041(11) -0.008(8) -0.013(8)
N520 0.072(15) 0.085(16) 0.108(16) -0.001(13) -0.016(11) -0.004(11)
C521 0.131(24) 0.096(20) 0.065(13) -0.043(14) -0.043(14) 0.030(16)
 
_geom_special_details
;
  All esds (except the esd in the dihedral angle between two l.s. planes)
  are estimated using the full covariance matrix.  The cell esds are taken
  into account individually in the estimation of esds in distances, angles
  and torsion angles; correlations between esds in cell parameters are only
  used when they are defined by crystal symmetry.  An approximate (isotropic)
  treatment of cell esds is used for estimating esds involving l.s. planes.
;
 
loop_
  _geom_bond_atom_site_label_1
  _geom_bond_atom_site_label_2
  _geom_bond_distance
  _geom_bond_site_symmetry_2
  _geom_bond_publ_flag
Pb1 Pb4 3.0326(14) . ?
Pb1 Pb5 3.0407(9) . ?
Pb1 Pb3 3.0533(10) . ?
Pb1 Pb2 3.0661(10) . ?
Pb2 Pb6 3.1248(11) . ?
Pb2 Pb7 3.1399(9) . ?
Pb2 Pb3 3.3091(14) . ?
Pb2 Pb5 3.3165(12) . ?
Pb3 Pb8 3.0844(13) . ?
Pb3 Pb7 3.1527(10) . ?
Pb3 Pb4 3.3200(12) . ?
Pb4 Pb9 3.1059(9) . ?
Pb4 Pb8 3.1082(9) . ?
Pb4 Pb5 3.3289(14) . ?
Pb5 Pb9 3.0765(11) . ?
Pb5 Pb6 3.1200(9) . ?
Pb6 Mo10 3.0840(13) . ?
Pb6 Pb7 3.1489(11) . ?
Pb6 Pb9 3.1842(12) . ?
Pb7 Mo10 3.052(2) . ?
Pb7 Pb8 3.2026(12) . ?
Pb8 Mo10 3.0055(12) . ?
Pb8 Pb9 3.2911(11) . ?
Pb9 Mo10 2.9852(11) . ?
Mo10 C13 1.926(12) . ?
Mo10 C12 1.926(10) . ?
Mo10 C11 1.950(13) . ?
C11 O11 1.19(2) . ?
C12 O12 1.175(13) . ?
C13 O13 1.189(14) . ?
Mo2 C2 1.916(13) . ?
Mo2 C3 1.917(13) . ?
Mo2 C1 1.932(10) . ?
Mo2 N3 2.298(9) . ?
Mo2 N4 2.315(9) . ?
Mo2 N1 2.346(10) . ?
C1 O1 1.176(13) . ?
C2 O2 1.20(2) . ?
C3 O3 1.18(2) . ?
N1 C4 1.48(2) . ?
N1 H1A 0.92 . ?
N1 H1B 0.92 . ?
C4 C5 1.49(2) . ?
C4 H4C 0.99 . ?
C4 H4D 0.99 . ?
C5 N2 1.51(3) . ?
C5 H5A 0.99 . ?
C5 H5B 0.99 . ?
N2 H2A 0.88 . ?
N2 H2B 0.88 . ?
N3 C7 1.467(15) . ?
N3 H3A 0.92 . ?
N3 H3B 0.92 . ?
C6 N4 1.481(14) . ?
C6 C7 1.52(2) . ?
C6 H6A 0.99 . ?
C6 H6B 0.99 . ?
C7 H7A 0.99 . ?
C7 H7B 0.99 . ?
N4 H4A 0.92 . ?
N4 H4B 0.92 . ?
K1 O112 2.798(8) . ?
K1 O123 2.806(7) . ?
K1 O120 2.828(8) . ?
K1 O115 2.833(8) . ?
K1 O103 2.855(8) . ?
K1 O106 2.875(9) . ?
K1 N100 2.898(10) . ?
K1 N109 2.939(9) . ?
N100 C118 1.470(15) . ?
N100 C101 1.483(13) . ?
N100 C117 1.50(2) . ?
C101 C102 1.50(2) . ?
C101 H10A 0.99 . ?
C101 H10B 0.99 . ?
C102 O103 1.42(2) . ?
C102 H10C 0.99 . ?
C102 H10D 0.99 . ?
O103 C104 1.39(2) . ?
C104 C105 1.53(2) . ?
C104 H10E 0.99 . ?
C104 H10F 0.99 . ?
C105 O106 1.409(15) . ?
C105 H10G 0.99 . ?
C105 H10H 0.99 . ?
O106 C107 1.425(15) . ?
C107 C108 1.48(2) . ?
C107 H10I 0.99 . ?
C107 H10J 0.99 . ?
C108 N109 1.49(2) . ?
C108 H10K 0.99 . ?
C108 H10L 0.99 . ?
N109 C125 1.442(14) . ?
N109 C110 1.472(15) . ?
C110 C111 1.51(2) . ?
C110 H11A 0.99 . ?
C110 H11B 0.99 . ?
C111 O112 1.433(13) . ?
C111 H11C 0.99 . ?
C111 H11D 0.99 . ?
O112 C113 1.410(14) . ?
C113 C114 1.48(2) . ?
C113 H11E 0.99 . ?
C113 H11F 0.99 . ?
C114 O115 1.450(14) . ?
C114 H11G 0.99 . ?
C114 H11H 0.99 . ?
O115 C116 1.401(13) . ?
C116 C117 1.51(2) . ?
C116 H11I 0.99 . ?
C116 H11J 0.99 . ?
C117 H11K 0.99 . ?
C117 H11L 0.99 . ?
C118 C119 1.54(2) . ?
C118 H11M 0.99 . ?
C118 H11N 0.99 . ?
C119 O120 1.406(14) . ?
C119 H11O 0.99 . ?
C119 H11P 0.99 . ?
O120 C121 1.423(12) . ?
C121 C122 1.45(2) . ?
C121 H12A 0.99 . ?
C121 H12B 0.99 . ?
C122 O123 1.435(13) . ?
C122 H12C 0.99 . ?
C122 H12D 0.99 . ?
O123 C124 1.429(14) . ?
C124 C125 1.52(2) . ?
C124 H12E 0.99 . ?
C124 H12F 0.99 . ?
C125 H12G 0.99 . ?
C125 H12H 0.99 . ?
K2 O223 2.788(9) . ?
K2 O203 2.791(8) . ?
K2 O212 2.791(8) . ?
K2 O220 2.808(10) . ?
K2 O206 2.875(9) . ?
K2 O215 2.886(9) . ?
K2 N200 2.962(10) . ?
K2 N209 2.993(9) . ?
N200 C218 1.46(2) . ?
N200 C217 1.47(2) . ?
N200 C201 1.49(2) . ?
C201 C202 1.50(2) . ?
C201 H20A 0.99 . ?
C201 H20B 0.99 . ?
C202 O203 1.432(14) . ?
C202 H20C 0.99 . ?
C202 H20D 0.99 . ?
O203 C204 1.445(13) . ?
C204 C205 1.47(2) . ?
C204 H20E 0.99 . ?
C204 H20F 0.99 . ?
C205 O206 1.445(14) . ?
C205 H20G 0.99 . ?
C205 H20H 0.99 . ?
O206 C207 1.41(2) . ?
C207 C208 1.50(2) . ?
C207 H20I 0.99 . ?
C207 H20J 0.99 . ?
C208 N209 1.45(2) . ?
C208 H20K 0.99 . ?
C208 H20L 0.99 . ?
N209 C210 1.45(2) . ?
N209 C225 1.47(2) . ?
C210 C211 1.47(2) . ?
C210 H21A 0.99 . ?
C210 H21B 0.99 . ?
C211 O212 1.412(15) . ?
C211 H21C 0.99 . ?
C211 H21D 0.99 . ?
O212 C213 1.401(15) . ?
C213 C214 1.45(2) . ?
C213 H21E 0.99 . ?
C213 H21F 0.99 . ?
C214 O215 1.44(2) . ?
C214 H21G 0.99 . ?
C214 H21H 0.99 . ?
O215 C216 1.40(2) . ?
C216 C217 1.50(2) . ?
C216 H21I 0.99 . ?
C216 H21J 0.99 . ?
C217 H21K 0.99 . ?
C217 H21L 0.99 . ?
C218 C219 1.48(2) . ?
C218 H21M 0.99 . ?
C218 H21N 0.99 . ?
C219 O220 1.45(2) . ?
C219 H21O 0.99 . ?
C219 H21P 0.99 . ?
O220 C221 1.40(2) . ?
C221 C222 1.45(2) . ?
C221 H22A 0.99 . ?
C221 H22B 0.99 . ?
C222 O223 1.41(2) . ?
C222 H22C 0.99 . ?
C222 H22D 0.99 . ?
O223 C224 1.43(2) . ?
C224 C225 1.53(2) . ?
C224 H22E 0.99 . ?
C224 H22F 0.99 . ?
C225 H22G 0.99 . ?
C225 H22H 0.99 . ?
K3 O320 2.773(11) . ?
K3 O315 2.799(9) . ?
K3 O323 2.806(11) . ?
K3 O303 2.822(9) . ?
K3 O306 2.825(8) . ?
K3 O312 2.826(8) . ?
K3 N300 3.006(9) . ?
K3 N309 3.019(10) . ?
K3 C321 3.53(3) . ?
N300 C318 1.45(2) . ?
N300 C317 1.46(2) . ?
N300 C301 1.49(2) . ?
C301 C302 1.50(2) . ?
C301 H30A 0.99 . ?
C301 H30B 0.99 . ?
C302 O303 1.418(14) . ?
C302 H30C 0.99 . ?
C302 H30D 0.99 . ?
O303 C304 1.414(14) . ?
C304 C305 1.47(2) . ?
C304 H30E 0.99 . ?
C304 H30F 0.99 . ?
C305 O306 1.43(2) . ?
C305 H30G 0.99 . ?
C305 H30H 0.99 . ?
O306 C307 1.45(2) . ?
C307 C308 1.47(2) . ?
C307 H30I 0.99 . ?
C307 H30J 0.99 . ?
C308 N309 1.49(2) . ?
C308 H30K 0.99 . ?
C308 H30L 0.99 . ?
N309 C325 1.43(2) . ?
N309 C310 1.45(2) . ?
C310 C311 1.51(2) . ?
C310 H31A 0.99 . ?
C310 H31B 0.99 . ?
C311 O312 1.442(13) . ?
C311 H31C 0.99 . ?
C311 H31D 0.99 . ?
O312 C313 1.422(14) . ?
C313 C314 1.51(2) . ?
C313 H31E 0.99 . ?
C313 H31F 0.99 . ?
C314 O315 1.442(13) . ?
C314 H31G 0.99 . ?
C314 H31H 0.99 . ?
O315 C316 1.452(13) . ?
C316 C317 1.52(2) . ?
C316 H31I 0.99 . ?
C316 H31J 0.99 . ?
C317 H31K 0.99 . ?
C317 H31P 0.99 . ?
C318 C319 1.50(3) . ?
C318 H31L 0.99 . ?
C318 H31M 0.99 . ?
C319 O320 1.38(2) . ?
C319 H31N 0.99 . ?
C319 H31O 0.99 . ?
O320 C321 1.26(3) . ?
C321 C322 1.56(4) . ?
C321 H32A 0.99 . ?
C321 H32H 0.99 . ?
C322 O323 1.58(3) . ?
C322 H32B 0.99 . ?
C322 H32C 0.99 . ?
O323 C324 1.45(2) . ?
C324 C325 1.57(2) . ?
C324 H32D 0.99 . ?
C324 H32E 0.99 . ?
C325 H32F 0.99 . ?
C325 H32G 0.99 . ?
K4 O415 2.781(9) . ?
K4 O403 2.801(10) . ?
K4 O412 2.824(9) . ?
K4 O423 2.831(10) . ?
K4 O406 2.836(11) . ?
K4 O420 2.836(9) . ?
K4 N409 2.988(14) . ?
K4 N400 2.998(12) . ?
N400 C418 1.46(2) . ?
N400 C417 1.468(15) . ?
N400 C401 1.48(2) . ?
C401 C402 1.47(2) . ?
C401 H40A 0.99 . ?
C401 H40B 0.99 . ?
C402 O403 1.45(2) . ?
C402 H40C 0.99 . ?
C402 H40D 0.99 . ?
O403 C404 1.414(15) . ?
C404 C405 1.48(2) . ?
C404 H40E 0.99 . ?
C404 H40F 0.99 . ?
C405 O406 1.439(15) . ?
C405 H40G 0.99 . ?
C405 H40H 0.99 . ?
O406 C407 1.40(2) . ?
C407 C408 1.54(2) . ?
C407 H40I 0.99 . ?
C407 H40J 0.99 . ?
C408 N409 1.45(2) . ?
C408 H40K 0.99 . ?
C408 H40L 0.99 . ?
N409 C425 1.45(2) . ?
N409 C410 1.51(2) . ?
C410 C411 1.49(2) . ?
C410 H41A 0.99 . ?
C410 H41B 0.99 . ?
C411 O412 1.42(2) . ?
C411 H41C 0.99 . ?
C411 H41D 0.99 . ?
O412 C413 1.441(15) . ?
C413 C414 1.42(2) . ?
C413 H41E 0.99 . ?
C413 H41F 0.99 . ?
C414 O415 1.42(2) . ?
C414 H41G 0.99 . ?
C414 H41P 0.99 . ?
O415 C416 1.42(2) . ?
C416 C417 1.51(2) . ?
C416 H41H 0.99 . ?
C416 H41I 0.99 . ?
C417 H41J 0.99 . ?
C417 H41K 0.99 . ?
C418 C419 1.51(2) . ?
C418 H41L 0.99 . ?
C418 H41M 0.99 . ?
C419 O420 1.40(2) . ?
C419 H41N 0.99 . ?
C419 H41O 0.99 . ?
O420 C421 1.447(14) . ?
C421 C422 1.46(2) . ?
C421 H42A 0.99 . ?
C421 H42B 0.99 . ?
C422 O423 1.43(2) . ?
C422 H42C 0.99 . ?
C422 H42D 0.99 . ?
O423 C424 1.41(2) . ?
C424 C425 1.52(2) . ?
C424 H42E 0.99 . ?
C424 H42F 0.99 . ?
C425 H42G 0.99 . ?
C425 H42H 0.99 . ?
N500 C501 1.44(2) . ?
N500 H50A 0.88 . ?
N500 H50B 0.88 . ?
C501 C502 1.52(2) . ?
C501 H50C 0.99 . ?
C501 H50D 0.99 . ?
C502 N503 1.43(2) . ?
C502 H50E 0.99 . ?
C502 H50F 0.99 . ?
N503 H50G 0.88 . ?
N503 H50H 0.88 . ?
N510 C511 1.41(3) . ?
N510 H51A 0.88 . ?
N510 H51B 0.88 . ?
C511 C512 1.50(3) . ?
C511 H51C 0.99 . ?
C511 H51D 0.99 . ?
C512 N513 1.52(3) . ?
C512 H51E 0.99 . ?
C512 H51F 0.99 . ?
N513 H51G 0.88 . ?
N513 H51H 0.88 . ?
N520 C521 1.52(4) . ?
N520 H52A 0.88 . ?
N520 H52B 0.88 . ?
C521 C521 1.39(4) 2_565 ?
C521 H52C 0.99 . ?
C521 H52D 0.99 . ?
 
loop_
  _geom_angle_atom_site_label_1
  _geom_angle_atom_site_label_2
  _geom_angle_atom_site_label_3
  _geom_angle
  _geom_angle_site_symmetry_1
  _geom_angle_site_symmetry_3
  _geom_angle_publ_flag
Pb4 Pb1 Pb5 66.48(4) . . ?
Pb4 Pb1 Pb3 66.12(2) . . ?
Pb5 Pb1 Pb3 100.64(3) . . ?
Pb4 Pb1 Pb2 100.71(3) . . ?
Pb5 Pb1 Pb2 65.79(3) . . ?
Pb3 Pb1 Pb2 65.47(3) . . ?
Pb1 Pb2 Pb6 109.49(3) . . ?
Pb1 Pb2 Pb7 110.06(3) . . ?
Pb6 Pb2 Pb7 60.35(3) . . ?
Pb1 Pb2 Pb3 57.08(3) . . ?
Pb6 Pb2 Pb3 100.80(3) . . ?
Pb7 Pb2 Pb3 58.46(2) . . ?
Pb1 Pb2 Pb5 56.74(2) . . ?
Pb6 Pb2 Pb5 57.85(3) . . ?
Pb7 Pb2 Pb5 100.41(4) . . ?
Pb3 Pb2 Pb5 90.13(3) . . ?
Pb1 Pb3 Pb8 110.20(3) . . ?
Pb1 Pb3 Pb7 110.05(3) . . ?
Pb8 Pb3 Pb7 61.78(3) . . ?
Pb1 Pb3 Pb2 57.45(2) . . ?
Pb8 Pb3 Pb2 102.36(3) . . ?
Pb7 Pb3 Pb2 58.08(2) . . ?
Pb1 Pb3 Pb4 56.64(3) . . ?
Pb8 Pb3 Pb4 57.93(3) . . ?
Pb7 Pb3 Pb4 100.41(2) . . ?
Pb2 Pb3 Pb4 90.22(3) . . ?
Pb1 Pb4 Pb9 109.49(4) . . ?
Pb1 Pb4 Pb8 110.11(2) . . ?
Pb9 Pb4 Pb8 63.96(3) . . ?
Pb1 Pb4 Pb3 57.24(3) . . ?
Pb9 Pb4 Pb3 101.56(3) . . ?
Pb8 Pb4 Pb3 57.23(3) . . ?
Pb1 Pb4 Pb5 56.88(3) . . ?
Pb9 Pb4 Pb5 57.00(2) . . ?
Pb8 Pb4 Pb5 102.00(3) . . ?
Pb3 Pb4 Pb5 89.72(3) . . ?
Pb1 Pb5 Pb9 110.06(4) . . ?
Pb1 Pb5 Pb6 110.28(3) . . ?
Pb9 Pb5 Pb6 61.84(2) . . ?
Pb1 Pb5 Pb2 57.48(3) . . ?
Pb9 Pb5 Pb2 101.79(3) . . ?
Pb6 Pb5 Pb2 57.99(2) . . ?
Pb1 Pb5 Pb4 56.65(3) . . ?
Pb9 Pb5 Pb4 57.85(2) . . ?
Pb6 Pb5 Pb4 100.71(3) . . ?
Pb2 Pb5 Pb4 89.93(3) . . ?
Mo10 Pb6 Pb5 111.87(3) . . ?
Mo10 Pb6 Pb2 114.20(4) . . ?
Pb5 Pb6 Pb2 64.16(3) . . ?
Mo10 Pb6 Pb7 58.63(3) . . ?
Pb5 Pb6 Pb7 104.65(3) . . ?
Pb2 Pb6 Pb7 60.06(2) . . ?
Mo10 Pb6 Pb9 56.85(3) . . ?
Pb5 Pb6 Pb9 58.41(2) . . ?
Pb2 Pb6 Pb9 103.75(3) . . ?
Pb7 Pb6 Pb9 90.90(3) . . ?
Mo10 Pb7 Pb2 114.67(3) . . ?
Mo10 Pb7 Pb6 59.62(3) . . ?
Pb2 Pb7 Pb6 59.59(3) . . ?
Mo10 Pb7 Pb3 111.88(3) . . ?
Pb2 Pb7 Pb3 63.45(3) . . ?
Pb6 Pb7 Pb3 103.80(2) . . ?
Mo10 Pb7 Pb8 57.38(3) . . ?
Pb2 Pb7 Pb8 103.57(3) . . ?
Pb6 Pb7 Pb8 91.65(3) . . ?
Pb3 Pb7 Pb8 58.06(3) . . ?
Mo10 Pb8 Pb3 115.16(3) . . ?
Mo10 Pb8 Pb4 111.98(3) . . ?
Pb3 Pb8 Pb4 64.84(2) . . ?
Mo10 Pb8 Pb7 58.79(4) . . ?
Pb3 Pb8 Pb7 60.16(3) . . ?
Pb4 Pb8 Pb7 104.03(2) . . ?
Mo10 Pb8 Pb9 56.38(2) . . ?
Pb3 Pb8 Pb9 102.69(3) . . ?
Pb4 Pb8 Pb9 57.99(2) . . ?
Pb7 Pb8 Pb9 88.04(3) . . ?
Mo10 Pb9 Pb5 115.95(3) . . ?
Mo10 Pb9 Pb4 112.61(3) . . ?
Pb5 Pb9 Pb4 65.16(3) . . ?
Mo10 Pb9 Pb6 59.88(3) . . ?
Pb5 Pb9 Pb6 59.75(3) . . ?
Pb4 Pb9 Pb6 104.32(4) . . ?
Mo10 Pb9 Pb8 56.97(3) . . ?
Pb5 Pb9 Pb8 103.57(3) . . ?
Pb4 Pb9 Pb8 58.06(2) . . ?
Pb6 Pb9 Pb8 89.41(3) . . ?
C13 Mo10 C12 87.7(4) . . ?
C13 Mo10 C11 89.6(5) . . ?
C12 Mo10 C11 94.7(5) . . ?
C13 Mo10 Pb9 85.1(3) . . ?
C12 Mo10 Pb9 163.1(4) . . ?
C11 Mo10 Pb9 100.5(3) . . ?
C13 Mo10 Pb8 83.3(3) . . ?
C12 Mo10 Pb8 97.4(4) . . ?
C11 Mo10 Pb8 165.7(3) . . ?
Pb9 Mo10 Pb8 66.65(3) . . ?
C13 Mo10 Pb7 142.6(3) . . ?
C12 Mo10 Pb7 79.9(3) . . ?
C11 Mo10 Pb7 126.2(4) . . ?
Pb9 Mo10 Pb7 96.75(3) . . ?
Pb8 Mo10 Pb7 63.83(3) . . ?
C13 Mo10 Pb6 144.7(3) . . ?
C12 Mo10 Pb6 126.9(3) . . ?
C11 Mo10 Pb6 81.8(3) . . ?
Pb9 Mo10 Pb6 63.26(3) . . ?
Pb8 Mo10 Pb6 96.84(4) . . ?
Pb7 Mo10 Pb6 61.75(3) . . ?
O11 C11 Mo10 177.1(11) . . ?
O12 C12 Mo10 178.0(10) . . ?
O13 C13 Mo10 178.5(9) . . ?
C2 Mo2 C3 84.9(5) . . ?
C2 Mo2 C1 86.8(5) . . ?
C3 Mo2 C1 87.5(5) . . ?
C2 Mo2 N3 94.6(4) . . ?
C3 Mo2 N3 99.2(4) . . ?
C1 Mo2 N3 173.2(4) . . ?
C2 Mo2 N4 97.2(4) . . ?
C3 Mo2 N4 173.9(4) . . ?
C1 Mo2 N4 98.3(4) . . ?
N3 Mo2 N4 74.9(3) . . ?
C2 Mo2 N1 175.1(4) . . ?
C3 Mo2 N1 95.2(4) . . ?
C1 Mo2 N1 98.1(4) . . ?
N3 Mo2 N1 80.6(4) . . ?
N4 Mo2 N1 82.2(4) . . ?
O1 C1 Mo2 177.0(11) . . ?
O2 C2 Mo2 176.7(10) . . ?
O3 C3 Mo2 179.2(11) . . ?
C4 N1 Mo2 121.9(8) . . ?
C4 N1 H1A 106.9(8) . . ?
Mo2 N1 H1A 106.8(2) . . ?
C4 N1 H1B 106.8(8) . . ?
Mo2 N1 H1B 106.8(3) . . ?
H1A N1 H1B 106.7 . . ?
N1 C4 C5 111.4(13) . . ?
N1 C4 H4C 109.4(7) . . ?
C5 C4 H4C 109.3(9) . . ?
N1 C4 H4D 109.3(8) . . ?
C5 C4 H4D 109.4(10) . . ?
H4C C4 H4D 108.0 . . ?
C4 C5 N2 115.5(12) . . ?
C4 C5 H5A 108.4(8) . . ?
N2 C5 H5A 108.4(8) . . ?
C4 C5 H5B 108.4(9) . . ?
N2 C5 H5B 108.4(8) . . ?
H5A C5 H5B 107.5 . . ?
C5 N2 H2A 120.0(7) . . ?
C5 N2 H2B 120.0(7) . . ?
H2A N2 H2B 120.0 . . ?
C7 N3 Mo2 112.7(7) . . ?
C7 N3 H3A 109.0(6) . . ?
Mo2 N3 H3A 109.0(3) . . ?
C7 N3 H3B 109.1(7) . . ?
Mo2 N3 H3B 109.1(3) . . ?
H3A N3 H3B 107.8 . . ?
N4 C6 C7 108.9(10) . . ?
N4 C6 H6A 109.9(6) . . ?
C7 C6 H6A 109.9(6) . . ?
N4 C6 H6B 109.9(7) . . ?
C7 C6 H6B 109.9(7) . . ?
H6A C6 H6B 108.3 . . ?
N3 C7 C6 110.1(9) . . ?
N3 C7 H7A 109.6(6) . . ?
C6 C7 H7A 109.6(6) . . ?
N3 C7 H7B 109.6(7) . . ?
C6 C7 H7B 109.6(7) . . ?
H7A C7 H7B 108.1 . . ?
C6 N4 Mo2 110.0(7) . . ?
C6 N4 H4A 109.7(7) . . ?
Mo2 N4 H4A 109.7(2) . . ?
C6 N4 H4B 109.7(6) . . ?
Mo2 N4 H4B 109.6(2) . . ?
H4A N4 H4B 108.2 . . ?
O112 K1 O123 98.3(2) . . ?
O112 K1 O120 137.8(3) . . ?
O123 K1 O120 58.8(2) . . ?
O112 K1 O115 58.8(2) . . ?
O123 K1 O115 115.5(3) . . ?
O120 K1 O115 97.1(2) . . ?
O112 K1 O103 113.9(3) . . ?
O123 K1 O103 143.0(3) . . ?
O120 K1 O103 102.4(3) . . ?
O115 K1 O103 97.2(2) . . ?
O112 K1 O106 98.4(3) . . ?
O123 K1 O106 100.7(2) . . ?
O120 K1 O106 119.3(3) . . ?
O115 K1 O106 138.6(2) . . ?
O103 K1 O106 58.4(2) . . ?
O112 K1 N100 118.6(3) . . ?
O123 K1 N100 117.6(3) . . ?
O120 K1 N100 60.2(2) . . ?
O115 K1 N100 61.0(3) . . ?
O103 K1 N100 62.9(3) . . ?
O106 K1 N100 119.3(3) . . ?
O112 K1 N109 61.5(3) . . ?
O123 K1 N109 62.4(2) . . ?
O120 K1 N109 119.8(2) . . ?
O115 K1 N109 119.1(3) . . ?
O103 K1 N109 117.1(3) . . ?
O106 K1 N109 60.7(3) . . ?
N100 K1 N109 179.9(3) . . ?
C118 N100 C101 109.8(10) . . ?
C118 N100 C117 109.8(10) . . ?
C101 N100 C117 110.0(9) . . ?
C118 N100 K1 110.9(6) . . ?
C101 N100 K1 107.8(7) . . ?
C117 N100 K1 108.5(7) . . ?
N100 C101 C102 114.4(9) . . ?
N100 C101 H10A 108.7(6) . . ?
C102 C101 H10A 108.7(7) . . ?
N100 C101 H10B 108.7(6) . . ?
C102 C101 H10B 108.6(6) . . ?
H10A C101 H10B 107.6 . . ?
O103 C102 C101 111.6(10) . . ?
O103 C102 H10C 109.3(6) . . ?
C101 C102 H10C 109.3(7) . . ?
O103 C102 H10D 109.3(6) . . ?
C101 C102 H10D 109.3(6) . . ?
H10C C102 H10D 108.0 . . ?
C104 O103 C102 109.4(10) . . ?
C104 O103 K1 116.2(7) . . ?
C102 O103 K1 114.1(7) . . ?
O103 C104 C105 108.8(11) . . ?
O103 C104 H10E 109.9(7) . . ?
C105 C104 H10E 109.9(7) . . ?
O103 C104 H10F 110.0(8) . . ?
C105 C104 H10F 109.9(8) . . ?
H10E C104 H10F 108.3 . . ?
O106 C105 C104 109.7(11) . . ?
O106 C105 H10G 109.7(6) . . ?
C104 C105 H10G 109.7(7) . . ?
O106 C105 H10H 109.7(7) . . ?
C104 C105 H10H 109.7(8) . . ?
H10G C105 H10H 108.2 . . ?
C105 O106 C107 112.0(9) . . ?
C105 O106 K1 117.6(7) . . ?
C107 O106 K1 117.3(7) . . ?
O106 C107 C108 111.4(10) . . ?
O106 C107 H10I 109.4(6) . . ?
C108 C107 H10I 109.4(7) . . ?
O106 C107 H10J 109.4(7) . . ?
C108 C107 H10J 109.4(7) . . ?
H10I C107 H10J 108.0 . . ?
C107 C108 N109 114.1(9) . . ?
C107 C108 H10K 108.7(7) . . ?
N109 C108 H10K 108.7(6) . . ?
C107 C108 H10L 108.7(7) . . ?
N109 C108 H10L 108.7(6) . . ?
H10K C108 H10L 107.6 . . ?
C125 N109 C110 110.7(10) . . ?
C125 N109 C108 108.7(9) . . ?
C110 N109 C108 108.5(9) . . ?
C125 N109 K1 108.5(7) . . ?
C110 N109 K1 109.4(6) . . ?
C108 N109 K1 111.0(7) . . ?
N109 C110 C111 114.2(10) . . ?
N109 C110 H11A 108.7(6) . . ?
C111 C110 H11A 108.7(6) . . ?
N109 C110 H11B 108.7(6) . . ?
C111 C110 H11B 108.7(6) . . ?
H11A C110 H11B 107.6 . . ?
O112 C111 C110 109.5(10) . . ?
O112 C111 H11C 109.8(6) . . ?
C110 C111 H11C 109.8(6) . . ?
O112 C111 H11D 109.8(6) . . ?
C110 C111 H11D 109.8(7) . . ?
H11C C111 H11D 108.2 . . ?
C113 O112 C111 109.8(9) . . ?
C113 O112 K1 120.5(7) . . ?
C111 O112 K1 118.3(7) . . ?
O112 C113 C114 110.2(10) . . ?
O112 C113 H11E 109.6(6) . . ?
C114 C113 H11E 109.6(6) . . ?
O112 C113 H11F 109.6(6) . . ?
C114 C113 H11F 109.6(7) . . ?
H11E C113 H11F 108.1 . . ?
O115 C114 C113 110.2(9) . . ?
O115 C114 H11G 109.6(6) . . ?
C113 C114 H11G 109.6(7) . . ?
O115 C114 H11H 109.6(6) . . ?
C113 C114 H11H 109.6(7) . . ?
H11G C114 H11H 108.1 . . ?
C116 O115 C114 111.5(8) . . ?
C116 O115 K1 120.7(7) . . ?
C114 O115 K1 116.4(7) . . ?
O115 C116 C117 108.5(9) . . ?
O115 C116 H11I 110.0(6) . . ?
C117 C116 H11I 110.0(7) . . ?
O115 C116 H11J 110.0(6) . . ?
C117 C116 H11J 110.0(7) . . ?
H11I C116 H11J 108.4 . . ?
N100 C117 C116 115.2(10) . . ?
N100 C117 H11K 108.5(6) . . ?
C116 C117 H11K 108.5(7) . . ?
N100 C117 H11L 108.5(6) . . ?
C116 C117 H11L 108.5(6) . . ?
H11K C117 H11L 107.5 . . ?
N100 C118 C119 111.8(10) . . ?
N100 C118 H11M 109.3(7) . . ?
C119 C118 H11M 109.3(7) . . ?
N100 C118 H11N 109.3(6) . . ?
C119 C118 H11N 109.2(6) . . ?
H11M C118 H11N 107.9 . . ?
O120 C119 C118 108.8(9) . . ?
O120 C119 H11O 109.9(6) . . ?
C118 C119 H11O 109.9(7) . . ?
O120 C119 H11P 109.9(6) . . ?
C118 C119 H11P 109.9(6) . . ?
H11O C119 H11P 108.3 . . ?
C119 O120 C121 110.9(9) . . ?
C119 O120 K1 120.9(6) . . ?
C121 O120 K1 117.1(6) . . ?
O120 C121 C122 110.0(10) . . ?
O120 C121 H12A 109.7(6) . . ?
C122 C121 H12A 109.7(6) . . ?
O120 C121 H12B 109.7(6) . . ?
C122 C121 H12B 109.7(7) . . ?
H12A C121 H12B 108.2 . . ?
O123 C122 C121 110.8(9) . . ?
O123 C122 H12C 109.5(6) . . ?
C121 C122 H12C 109.5(6) . . ?
O123 C122 H12D 109.5(7) . . ?
C121 C122 H12D 109.5(7) . . ?
H12C C122 H12D 108.1 . . ?
C124 O123 C122 110.8(8) . . ?
C124 O123 K1 115.8(6) . . ?
C122 O123 K1 117.7(6) . . ?
O123 C124 C125 109.8(9) . . ?
O123 C124 H12E 109.7(6) . . ?
C125 C124 H12E 109.7(7) . . ?
O123 C124 H12F 109.7(6) . . ?
C125 C124 H12F 109.7(6) . . ?
H12E C124 H12F 108.2 . . ?
N109 C125 C124 116.5(10) . . ?
N109 C125 H12G 108.2(7) . . ?
C124 C125 H12G 108.2(7) . . ?
N109 C125 H12H 108.1(6) . . ?
C124 C125 H12H 108.2(6) . . ?
H12G C125 H12H 107.3 . . ?
O223 K2 O203 139.2(3) . . ?
O223 K2 O212 99.0(3) . . ?
O203 K2 O212 116.7(3) . . ?
O223 K2 O220 60.2(3) . . ?
O203 K2 O220 97.7(3) . . ?
O212 K2 O220 140.1(3) . . ?
O223 K2 O206 97.2(3) . . ?
O203 K2 O206 60.3(2) . . ?
O212 K2 O206 98.5(3) . . ?
O220 K2 O206 116.6(3) . . ?
O223 K2 O215 117.8(3) . . ?
O203 K2 O215 98.0(3) . . ?
O212 K2 O215 59.2(3) . . ?
O220 K2 O215 98.5(3) . . ?
O206 K2 O215 139.8(3) . . ?
O223 K2 N200 119.3(3) . . ?
O203 K2 N200 61.4(3) . . ?
O212 K2 N200 117.8(3) . . ?
O220 K2 N200 60.7(3) . . ?
O206 K2 N200 120.4(3) . . ?
O215 K2 N200 59.9(3) . . ?
O223 K2 N209 62.3(3) . . ?
O203 K2 N209 118.2(3) . . ?
O212 K2 N209 60.5(3) . . ?
O220 K2 N209 121.1(3) . . ?
O206 K2 N209 59.8(3) . . ?
O215 K2 N209 118.6(3) . . ?
N200 K2 N209 178.1(3) . . ?
C218 N200 C217 109.2(11) . . ?
C218 N200 C201 109.7(13) . . ?
C217 N200 C201 110.8(12) . . ?
C218 N200 K2 109.4(8) . . ?
C217 N200 K2 110.1(8) . . ?
C201 N200 K2 107.6(7) . . ?
N200 C201 C202 113.7(12) . . ?
N200 C201 H20A 108.8(7) . . ?
C202 C201 H20A 108.8(7) . . ?
N200 C201 H20B 108.8(9) . . ?
C202 C201 H20B 108.8(9) . . ?
H20A C201 H20B 107.7 . . ?
O203 C202 C201 108.3(11) . . ?
O203 C202 H20C 110.0(7) . . ?
C201 C202 H20C 110.0(7) . . ?
O203 C202 H20D 110.0(7) . . ?
C201 C202 H20D 110.0(9) . . ?
H20C C202 H20D 108.4 . . ?
C202 O203 C204 109.3(9) . . ?
C202 O203 K2 118.6(7) . . ?
C204 O203 K2 115.8(7) . . ?
O203 C204 C205 110.2(10) . . ?
O203 C204 H20E 109.6(7) . . ?
C205 C204 H20E 109.6(8) . . ?
O203 C204 H20F 109.6(6) . . ?
C205 C204 H20F 109.6(7) . . ?
H20E C204 H20F 108.1 . . ?
O206 C205 C204 110.1(11) . . ?
O206 C205 H20G 109.6(7) . . ?
C204 C205 H20G 109.6(8) . . ?
O206 C205 H20H 109.6(6) . . ?
C204 C205 H20H 109.6(7) . . ?
H20G C205 H20H 108.2 . . ?
C207 O206 C205 111.9(10) . . ?
C207 O206 K2 117.9(7) . . ?
C205 O206 K2 113.9(6) . . ?
O206 C207 C208 111.2(12) . . ?
O206 C207 H20I 109.4(7) . . ?
C208 C207 H20I 109.4(7) . . ?
O206 C207 H20J 109.4(8) . . ?
C208 C207 H20J 109.4(9) . . ?
H20I C207 H20J 108.0 . . ?
N209 C208 C207 114.7(10) . . ?
N209 C208 H20K 108.6(7) . . ?
C207 C208 H20K 108.6(8) . . ?
N209 C208 H20L 108.6(8) . . ?
C207 C208 H20L 108.6(9) . . ?
H20K C208 H20L 107.6 . . ?
C208 N209 C210 110.4(11) . . ?
C208 N209 C225 110.3(10) . . ?
C210 N209 C225 109.3(11) . . ?
C208 N209 K2 110.9(7) . . ?
C210 N209 K2 109.2(7) . . ?
C225 N209 K2 106.6(7) . . ?
N209 C210 C211 115.3(11) . . ?
N209 C210 H21A 108.4(6) . . ?
C211 C210 H21A 108.4(7) . . ?
N209 C210 H21B 108.4(7) . . ?
C211 C210 H21B 108.5(9) . . ?
H21A C210 H21B 107.5 . . ?
O212 C211 C210 112.0(11) . . ?
O212 C211 H21C 109.2(7) . . ?
C210 C211 H21C 109.2(8) . . ?
O212 C211 H21D 109.2(8) . . ?
C210 C211 H21D 109.2(9) . . ?
H21C C211 H21D 107.9 . . ?
C213 O212 C211 111.2(10) . . ?
C213 O212 K2 118.5(8) . . ?
C211 O212 K2 119.2(7) . . ?
O212 C213 C214 110.1(12) . . ?
O212 C213 H21E 109.7(9) . . ?
C214 C213 H21E 109.6(10) . . ?
O212 C213 H21F 109.6(8) . . ?
C214 C213 H21F 109.6(9) . . ?
H21E C213 H21F 108.2 . . ?
O215 C214 C213 110.3(13) . . ?
O215 C214 H21G 109.6(8) . . ?
C213 C214 H21G 109.6(10) . . ?
O215 C214 H21H 109.6(7) . . ?
C213 C214 H21H 109.6(8) . . ?
H21G C214 H21H 108.1 . . ?
C216 O215 C214 112.7(11) . . ?
C216 O215 K2 117.4(8) . . ?
C214 O215 K2 111.9(7) . . ?
O215 C216 C217 109.9(13) . . ?
O215 C216 H21I 109.7(7) . . ?
C217 C216 H21I 109.7(7) . . ?
O215 C216 H21J 109.7(8) . . ?
C217 C216 H21J 109.7(9) . . ?
H21I C216 H21J 108.2 . . ?
N200 C217 C216 113.1(11) . . ?
N200 C217 H21K 109.0(7) . . ?
C216 C217 H21K 109.0(8) . . ?
N200 C217 H21L 109.0(8) . . ?
C216 C217 H21L 109.0(9) . . ?
H21K C217 H21L 107.8 . . ?
N200 C218 C219 113.3(12) . . ?
N200 C218 H21M 108.9(7) . . ?
C219 C218 H21M 108.9(7) . . ?
N200 C218 H21N 108.9(8) . . ?
C219 C218 H21N 108.9(9) . . ?
H21M C218 H21N 107.7 . . ?
O220 C219 C218 109.2(10) . . ?
O220 C219 H21O 109.8(7) . . ?
C218 C219 H21O 109.9(8) . . ?
O220 C219 H21P 109.8(7) . . ?
C218 C219 H21P 109.8(9) . . ?
H21O C219 H21P 108.3 . . ?
C221 O220 C219 111.4(11) . . ?
C221 O220 K2 116.5(9) . . ?
C219 O220 K2 117.4(8) . . ?
O220 C221 C222 110.4(13) . . ?
O220 C221 H22A 109.6(9) . . ?
C222 C221 H22A 109.6(11) . . ?
O220 C221 H22B 109.6(9) . . ?
C222 C221 H22B 109.6(10) . . ?
H22A C221 H22B 108.1 . . ?
O223 C222 C221 113.2(14) . . ?
O223 C222 H22C 108.9(9) . . ?
C221 C222 H22C 108.9(11) . . ?
O223 C222 H22D 108.9(8) . . ?
C221 C222 H22D 108.9(8) . . ?
H22C C222 H22D 107.7 . . ?
C222 O223 C224 112.4(12) . . ?
C222 O223 K2 114.2(8) . . ?
C224 O223 K2 116.8(8) . . ?
O223 C224 C225 110.0(11) . . ?
O223 C224 H22E 109.7(7) . . ?
C225 C224 H22E 109.7(8) . . ?
O223 C224 H22F 109.7(9) . . ?
C225 C224 H22F 109.7(9) . . ?
H22E C224 H22F 108.2 . . ?
N209 C225 C224 113.3(11) . . ?
N209 C225 H22G 108.9(6) . . ?
C224 C225 H22G 108.9(7) . . ?
N209 C225 H22H 108.9(7) . . ?
C224 C225 H22H 108.9(9) . . ?
H22G C225 H22H 107.7 . . ?
O320 K3 O315 96.7(4) . . ?
O320 K3 O323 62.3(4) . . ?
O315 K3 O323 140.7(4) . . ?
O320 K3 O303 94.8(4) . . ?
O315 K3 O303 99.9(3) . . ?
O323 K3 O303 113.9(4) . . ?
O320 K3 O306 136.0(5) . . ?
O315 K3 O306 121.7(3) . . ?
O323 K3 O306 93.1(4) . . ?
O303 K3 O306 60.6(2) . . ?
O320 K3 O312 117.7(4) . . ?
O315 K3 O312 60.3(2) . . ?
O323 K3 O312 98.6(3) . . ?
O303 K3 O312 142.4(3) . . ?
O306 K3 O312 100.8(3) . . ?
O320 K3 N300 59.3(3) . . ?
O315 K3 N300 60.3(3) . . ?
O323 K3 N300 120.0(3) . . ?
O303 K3 N300 60.4(3) . . ?
O306 K3 N300 119.9(3) . . ?
O312 K3 N300 119.2(3) . . ?
O320 K3 N309 119.3(3) . . ?
O315 K3 N309 120.7(3) . . ?
O323 K3 N309 58.6(3) . . ?
O303 K3 N309 120.0(3) . . ?
O306 K3 N309 60.7(3) . . ?
O312 K3 N309 61.5(3) . . ?
N300 K3 N309 178.6(3) . . ?
O320 K3 C321 18.6(5) . . ?
O315 K3 C321 113.7(5) . . ?
O323 K3 C321 44.2(5) . . ?
O303 K3 C321 98.6(5) . . ?
O306 K3 C321 122.9(6) . . ?
O312 K3 C321 118.3(5) . . ?
N300 K3 C321 76.2(5) . . ?
N309 K3 C321 102.3(5) . . ?
C318 N300 C317 110.1(11) . . ?
C318 N300 C301 111.1(10) . . ?
C317 N300 C301 109.7(11) . . ?
C318 N300 K3 108.4(8) . . ?
C317 N300 K3 108.1(6) . . ?
C301 N300 K3 109.4(7) . . ?
N300 C301 C302 113.0(9) . . ?
N300 C301 H30A 109.0(7) . . ?
C302 C301 H30A 109.0(7) . . ?
N300 C301 H30B 109.0(6) . . ?
C302 C301 H30B 109.0(7) . . ?
H30A C301 H30B 107.8 . . ?
O303 C302 C301 109.0(10) . . ?
O303 C302 H30C 109.9(6) . . ?
C301 C302 H30C 109.9(7) . . ?
O303 C302 H30D 109.9(6) . . ?
C301 C302 H30D 109.9(6) . . ?
H30C C302 H30D 108.3 . . ?
C304 O303 C302 111.4(10) . . ?
C304 O303 K3 112.9(7) . . ?
C302 O303 K3 116.7(7) . . ?
O303 C304 C305 111.2(11) . . ?
O303 C304 H30E 109.4(6) . . ?
C305 C304 H30E 109.4(7) . . ?
O303 C304 H30F 109.4(7) . . ?
C305 C304 H30F 109.4(9) . . ?
H30E C304 H30F 108.0 . . ?
O306 C305 C304 108.0(12) . . ?
O306 C305 H30G 110.1(7) . . ?
C304 C305 H30G 110.1(7) . . ?
O306 C305 H30H 110.1(9) . . ?
C304 C305 H30H 110.1(9) . . ?
H30G C305 H30H 108.4 . . ?
C305 O306 C307 111.2(10) . . ?
C305 O306 K3 112.9(7) . . ?
C307 O306 K3 118.2(8) . . ?
O306 C307 C308 109.8(12) . . ?
O306 C307 H30I 109.7(9) . . ?
C308 C307 H30I 109.7(10) . . ?
O306 C307 H30J 109.7(8) . . ?
C308 C307 H30J 109.7(8) . . ?
H30I C307 H30J 108.2 . . ?
C307 C308 N309 114.0(11) . . ?
C307 C308 H30K 108.8(8) . . ?
N309 C308 H30K 108.8(6) . . ?
C307 C308 H30L 108.7(10) . . ?
N309 C308 H30L 108.7(7) . . ?
H30K C308 H30L 107.7 . . ?
C325 N309 C310 110.9(11) . . ?
C325 N309 C308 109.4(12) . . ?
C310 N309 C308 108.2(10) . . ?
C325 N309 K3 112.1(7) . . ?
C310 N309 K3 108.5(7) . . ?
C308 N309 K3 107.5(7) . . ?
N309 C310 C311 115.9(10) . . ?
N309 C310 H31A 108.3(6) . . ?
C311 C310 H31A 108.3(7) . . ?
N309 C310 H31B 108.3(6) . . ?
C311 C310 H31B 108.3(6) . . ?
H31A C310 H31B 107.4 . . ?
O312 C311 C310 110.3(10) . . ?
O312 C311 H31C 109.6(7) . . ?
C310 C311 H31C 109.6(7) . . ?
O312 C311 H31D 109.6(7) . . ?
C310 C311 H31D 109.6(7) . . ?
H31C C311 H31D 108.1 . . ?
C313 O312 C311 109.9(9) . . ?
C313 O312 K3 114.0(6) . . ?
C311 O312 K3 115.2(7) . . ?
O312 C313 C314 109.7(9) . . ?
O312 C313 H31E 109.7(6) . . ?
C314 C313 H31E 109.7(6) . . ?
O312 C313 H31F 109.7(7) . . ?
C314 C313 H31F 109.7(7) . . ?
H31E C313 H31F 108.2 . . ?
O315 C314 C313 107.4(9) . . ?
O315 C314 H31G 110.2(6) . . ?
C313 C314 H31G 110.2(6) . . ?
O315 C314 H31H 110.2(6) . . ?
C313 C314 H31H 110.3(7) . . ?
H31G C314 H31H 108.5 . . ?
C314 O315 C316 107.2(9) . . ?
C314 O315 K3 116.5(6) . . ?
C316 O315 K3 120.7(7) . . ?
O315 C316 C317 105.6(9) . . ?
O315 C316 H31I 110.6(7) . . ?
C317 C316 H31I 110.6(8) . . ?
O315 C316 H31J 110.6(7) . . ?
C317 C316 H31J 110.6(7) . . ?
H31I C316 H31J 108.8 . . ?
N300 C317 C316 115.9(11) . . ?
N300 C317 H31K 108.3(7) . . ?
C316 C317 H31K 108.3(8) . . ?
N300 C317 H31P 108.3(6) . . ?
C316 C317 H31P 108.3(6) . . ?
H31K C317 H31P 107.4 . . ?
N300 C318 C319 113.0(13) . . ?
N300 C318 H31L 109.0(8) . . ?
C319 C318 H31L 109.0(9) . . ?
N300 C318 H31M 109.0(7) . . ?
C319 C318 H31M 109.0(7) . . ?
H31L C318 H31M 107.8 . . ?
O320 C319 C318 108.2(14) . . ?
O320 C319 H31N 110.1(12) . . ?
C318 C319 H31N 110.1(9) . . ?
O320 C319 H31O 110.1(8) . . ?
C318 C319 H31O 110.1(7) . . ?
H31N C319 H31O 108.4 . . ?
C321 O320 C319 108.2(17) . . ?
C321 O320 K3 116.9(15) . . ?
C319 O320 K3 121.0(8) . . ?
O320 C321 C322 120.9(24) . . ?
O320 C321 K3 44.5(12) . . ?
C322 C321 K3 85.6(15) . . ?
O320 C321 H32A 106.9(15) . . ?
C322 C321 H32A 106.6(16) . . ?
K3 C321 H32A 148.7(5) . . ?
O320 C321 H32H 107.6(17) . . ?
C322 C321 H32H 107.3(17) . . ?
K3 C321 H32H 96.3(5) . . ?
H32A C321 H32H 106.8 . . ?
C321 C322 O323 103.7(21) . . ?
C321 C322 H32B 111.0(17) . . ?
O323 C322 H32B 110.7(13) . . ?
C321 C322 H32C 111.3(16) . . ?
O323 C322 H32C 111.2(13) . . ?
H32B C322 H32C 108.9 . . ?
C324 O323 C322 102.6(15) . . ?
C324 O323 K3 118.6(8) . . ?
C322 O323 K3 114.4(13) . . ?
O323 C324 C325 103.9(13) . . ?
O323 C324 H32D 111.1(11) . . ?
C325 C324 H32D 111.1(9) . . ?
O323 C324 H32E 110.9(7) . . ?
C325 C324 H32E 110.8(8) . . ?
H32D C324 H32E 109.0 . . ?
N309 C325 C324 111.0(13) . . ?
N309 C325 H32F 109.3(9) . . ?
C324 C325 H32F 109.5(9) . . ?
N309 C325 H32G 109.5(7) . . ?
C324 C325 H32G 109.5(8) . . ?
H32F C325 H32G 108.0 . . ?
O415 K4 O403 97.4(3) . . ?
O415 K4 O412 60.9(3) . . ?
O403 K4 O412 140.7(3) . . ?
O415 K4 O423 136.8(3) . . ?
O403 K4 O423 120.3(3) . . ?
O412 K4 O423 94.7(3) . . ?
O415 K4 O406 117.3(3) . . ?
O403 K4 O406 60.7(3) . . ?
O412 K4 O406 98.4(3) . . ?
O423 K4 O406 100.2(3) . . ?
O415 K4 O420 95.2(3) . . ?
O403 K4 O420 100.0(3) . . ?
O412 K4 O420 113.5(3) . . ?
O423 K4 O420 60.5(3) . . ?
O406 K4 O420 142.9(3) . . ?
O415 K4 N409 120.6(3) . . ?
O403 K4 N409 119.0(3) . . ?
O412 K4 N409 61.4(3) . . ?
O423 K4 N409 60.2(3) . . ?
O406 K4 N409 59.9(3) . . ?
O420 K4 N409 119.5(3) . . ?
O415 K4 N400 60.5(3) . . ?
O403 K4 N400 60.6(3) . . ?
O412 K4 N400 119.6(3) . . ?
O423 K4 N400 118.9(3) . . ?
O406 K4 N400 120.1(3) . . ?
O420 K4 N400 59.8(3) . . ?
N409 K4 N400 178.8(3) . . ?
C418 N400 C417 111.2(11) . . ?
C418 N400 C401 109.2(10) . . ?
C417 N400 C401 110.3(10) . . ?
C418 N400 K4 111.3(8) . . ?
C417 N400 K4 108.1(8) . . ?
C401 N400 K4 106.7(8) . . ?
C402 C401 N400 115.6(11) . . ?
C402 C401 H40A 108.4(8) . . ?
N400 C401 H40A 108.4(8) . . ?
C402 C401 H40B 108.4(7) . . ?
N400 C401 H40B 108.4(6) . . ?
H40A C401 H40B 107.4 . . ?
O403 C402 C401 108.6(11) . . ?
O403 C402 H40C 110.0(6) . . ?
C401 C402 H40C 110.0(7) . . ?
O403 C402 H40D 110.0(6) . . ?
C401 C402 H40D 110.0(7) . . ?
H40C C402 H40D 108.3 . . ?
C404 O403 C402 111.6(10) . . ?
C404 O403 K4 112.8(8) . . ?
C402 O403 K4 120.1(7) . . ?
O403 C404 C405 112.5(11) . . ?
O403 C404 H40E 109.1(7) . . ?
C405 C404 H40E 109.1(7) . . ?
O403 C404 H40F 109.1(6) . . ?
C405 C404 H40F 109.1(7) . . ?
H40E C404 H40F 107.8 . . ?
O406 C405 C404 108.6(10) . . ?
O406 C405 H40G 110.0(6) . . ?
C404 C405 H40G 110.0(7) . . ?
O406 C405 H40H 110.0(6) . . ?
C404 C405 H40H 110.0(7) . . ?
H40G C405 H40H 108.3 . . ?
C407 O406 C405 110.8(10) . . ?
C407 O406 K4 117.2(9) . . ?
C405 O406 K4 115.7(8) . . ?
O406 C407 C408 109.9(12) . . ?
O406 C407 H40I 109.7(8) . . ?
C408 C407 H40I 109.7(9) . . ?
O406 C407 H40J 109.7(8) . . ?
C408 C407 H40J 109.7(9) . . ?
H40I C407 H40J 108.2 . . ?
N409 C408 C407 112.1(13) . . ?
N409 C408 H40K 109.2(8) . . ?
C407 C408 H40K 109.2(9) . . ?
N409 C408 H40L 109.2(9) . . ?
C407 C408 H40L 109.2(9) . . ?
H40K C408 H40L 107.9 . . ?
C408 N409 C425 108.9(13) . . ?
C408 N409 C410 109.6(12) . . ?
C425 N409 C410 108.9(12) . . ?
C408 N409 K4 111.7(9) . . ?
C425 N409 K4 109.2(9) . . ?
C410 N409 K4 108.4(9) . . ?
C411 C410 N409 112.5(13) . . ?
C411 C410 H41A 109.1(10) . . ?
N409 C410 H41A 109.1(9) . . ?
C411 C410 H41B 109.1(10) . . ?
N409 C410 H41B 109.1(9) . . ?
H41A C410 H41B 107.8 . . ?
O412 C411 C410 110.7(14) . . ?
O412 C411 H41C 109.5(8) . . ?
C410 C411 H41C 109.5(10) . . ?
O412 C411 H41D 109.5(7) . . ?
C410 C411 H41D 109.5(9) . . ?
H41C C411 H41D 108.1 . . ?
C411 O412 C413 112.5(10) . . ?
C411 O412 K4 115.5(8) . . ?
C413 O412 K4 111.2(7) . . ?
C414 C413 O412 111.4(10) . . ?
C414 C413 H41E 109.3(8) . . ?
O412 C413 H41E 109.3(7) . . ?
C414 C413 H41F 109.3(7) . . ?
O412 C413 H41F 109.3(6) . . ?
H41E C413 H41F 108.0 . . ?
O415 C414 C413 109.6(12) . . ?
O415 C414 H41G 109.8(7) . . ?
C413 C414 H41G 109.8(6) . . ?
O415 C414 H41P 109.8(7) . . ?
C413 C414 H41P 109.8(8) . . ?
H41G C414 H41P 108.2 . . ?
C414 O415 C416 111.1(11) . . ?
C414 O415 K4 114.2(8) . . ?
C416 O415 K4 120.4(7) . . ?
O415 C416 C417 110.1(13) . . ?
O415 C416 H41H 109.6(8) . . ?
C417 C416 H41H 109.6(9) . . ?
O415 C416 H41I 109.7(6) . . ?
C417 C416 H41I 109.7(7) . . ?
H41H C416 H41I 108.2 . . ?
N400 C417 C416 113.0(11) . . ?
N400 C417 H41J 109.0(8) . . ?
C416 C417 H41J 109.0(9) . . ?
N400 C417 H41K 109.0(8) . . ?
C416 C417 H41K 109.0(9) . . ?
H41J C417 H41K 107.8 . . ?
N400 C418 C419 113.6(12) . . ?
N400 C418 H41L 108.9(7) . . ?
C419 C418 H41L 108.9(8) . . ?
N400 C418 H41M 108.8(8) . . ?
C419 C418 H41M 108.8(8) . . ?
H41L C418 H41M 107.7 . . ?
O420 C419 C418 111.2(10) . . ?
O420 C419 H41N 109.4(7) . . ?
C418 C419 H41N 109.4(8) . . ?
O420 C419 H41O 109.4(7) . . ?
C418 C419 H41O 109.4(8) . . ?
H41N C419 H41O 108.0 . . ?
C419 O420 C421 111.1(11) . . ?
C419 O420 K4 119.3(7) . . ?
C421 O420 K4 115.3(8) . . ?
O420 C421 C422 110.1(11) . . ?
O420 C421 H42A 109.6(7) . . ?
C422 C421 H42A 109.7(8) . . ?
O420 C421 H42B 109.6(7) . . ?
C422 C421 H42B 109.6(7) . . ?
H42A C421 H42B 108.2 . . ?
O423 C422 C421 112.2(12) . . ?
O423 C422 H42C 109.2(6) . . ?
C421 C422 H42C 109.1(7) . . ?
O423 C422 H42D 109.2(7) . . ?
C421 C422 H42D 109.2(7) . . ?
H42C C422 H42D 107.9 . . ?
C424 O423 C422 111.4(12) . . ?
C424 O423 K4 120.1(8) . . ?
C422 O423 K4 113.4(7) . . ?
O423 C424 C425 109.0(13) . . ?
O423 C424 H42E 109.9(7) . . ?
C425 C424 H42E 109.9(9) . . ?
O423 C424 H42F 109.9(7) . . ?
C425 C424 H42F 109.9(8) . . ?
H42E C424 H42F 108.3 . . ?
N409 C425 C424 115.4(13) . . ?
N409 C425 H42G 108.4(8) . . ?
C424 C425 H42G 108.4(9) . . ?
N409 C425 H42H 108.4(9) . . ?
C424 C425 H42H 108.4(9) . . ?
H42G C425 H42H 107.5 . . ?
C501 N500 H50A 120.0(7) . . ?
C501 N500 H50B 120.0(7) . . ?
H50A N500 H50B 120.0 . . ?
N500 C501 C502 109.1(11) . . ?
N500 C501 H50C 109.8(7) . . ?
C502 C501 H50C 109.8(7) . . ?
N500 C501 H50D 109.9(9) . . ?
C502 C501 H50D 109.9(9) . . ?
H50C C501 H50D 108.3 . . ?
N503 C502 C501 115.2(12) . . ?
N503 C502 H50E 108.5(8) . . ?
C501 C502 H50E 108.5(8) . . ?
N503 C502 H50F 108.5(9) . . ?
C501 C502 H50F 108.5(9) . . ?
H50E C502 H50F 107.5 . . ?
C502 N503 H50G 120.0(7) . . ?
C502 N503 H50H 120.0(7) . . ?
H50G N503 H50H 120.0 . . ?
C511 N510 H51A 120.0(11) . . ?
C511 N510 H51B 120.0(11) . . ?
H51A N510 H51B 120.0 . . ?
N510 C511 C512 112.9(19) . . ?
N510 C511 H51C 109.0(11) . . ?
C512 C511 H51C 109.0(11) . . ?
N510 C511 H51D 109.0(11) . . ?
C512 C511 H51D 109.0(11) . . ?
H51C C511 H51D 107.8 . . ?
C511 C512 N513 110.9(18) . . ?
C511 C512 H51E 109.5(12) . . ?
N513 C512 H51E 109.5(10) . . ?
C511 C512 H51F 109.5(11) . . ?
N513 C512 H51F 109.5(10) . . ?
H51E C512 H51F 108.1 . . ?
C512 N513 H51G 120.0(10) . . ?
C512 N513 H51H 120.0(10) . . ?
H51G N513 H51H 120.0 . . ?
C521 N520 H52A 120.0(12) . . ?
C521 N520 H52B 120.0(12) . . ?
H52A N520 H52B 120.0 . . ?
C521 C521 N520 104.6(34) 2_565 . ?
C521 C521 H52C 110.9(21) 2_565 . ?
N520 C521 H52C 110.8(12) . . ?
C521 C521 H52D 110.8(18) 2_565 . ?
N520 C521 H52D 110.8(11) . . ?
H52C C521 H52D 108.9 . . ?
 
_refine_diff_density_max    5.444
_refine_diff_density_min   -4.394
_refine_diff_density_rms    0.391

#===END
